# Supplementary material for: An Optimized Method for LC-MS Based Quantification of Endogenous Organic Acids: Metabolic Perturbations in Pancreatic Cancer
Source: Preprints.org preprint supplement (doi:10.20944/preprints202404.0528.v1), 2024-04-08
Supplement: Supplementary file 2 [file supplementary]

## **Supplementary Information**

### **An optimized method for LC-MS based quantification of endogenous organic acids: metabolic perturbations in pancreatic cancer**

<sup>§</sup>Shreyans K. Jain<sup>a</sup>, <sup>§</sup>Shivani Bansal<sup>a</sup>, <sup>§</sup>Sunil Bansal<sup>a</sup>, Baldev Singh<sup>a</sup>, William Klotzbier<sup>a</sup>, Khyati Y. Mehta<sup>a</sup>, Amrita K. Cheema<sup>a,b\*</sup>

<sup>a</sup>Department of Oncology, Lombardi Comprehensive Cancer Centre, Georgetown University Medical Centre, Washington, DC, United States of America

<sup>b</sup>Department of Biochemistry Molecular and Cellular Biology, Georgetown University Medical Centre, Washington, DC, United States of America

<sup>§</sup>: Both authors contributed equally.

\*Corresponding Author

**Professor, Department of Oncology, Lombardi Comprehensive Cancer Center,**

**E-415, New Research Building**

**3900 Reservoir Road NW, Washington D.C. 20057**

**Georgetown University Medical Center**

**E-mail: akc27@georgetown.edu**

Phone: (202)-687-2756 Fax: (202)-687-8860

| <b><u>CONTENTS</u></b>                                                                                                                                                                            | <b><u>PAGE NO.</u></b> |
|---------------------------------------------------------------------------------------------------------------------------------------------------------------------------------------------------|------------------------|
| <b>Supplementary Table S1.</b> List of CCMs, the structures of parent molecules and their corresponding benzimidazole derivatives along with MRM Transitions and other parameters.                | 5-13                   |
| <b>Supplementary Table S2.</b> Quantitation results of 76 CCMs in human body fluids, tissue, and cell lines (in ng/mL).                                                                           | 14-16                  |
| <b>Supplementary Table S3.</b> List of metabolites with respective MRM transitions, retention time (RT), limit of detection (LOD), linearity range, single to noise (S/N) ratio and $r^2$ values. | 17-19                  |
| <b>Supplementary Figure S1.</b> LC Chromatogram of derivatized CCMs                                                                                                                               | 20-95                  |
| <b>Supplementary Figure S2.</b> Standard curve of derivatized CCMs                                                                                                                                | 96-173                 |

## 1. Materials and Methods

### 1.1 Collection and Handling of biospecimens

Samples (plasma, serum, saliva, urine, and liver tissue) were made available through the Indivumed repository at the MedStar-Georgetown University hospital protocols under approved institutional review board (IRB) protocols. On the day of analysis, samples were thawed on ice and immediately refrozen (-80 °C) after an appropriate aliquot was taken for analysis.

### 1.2 Cell culture

hTERT-HPNE and HPDE-H6c7 cells were grown in keratinocyte serum free media (K-SFM, 1 ml), containing K-SFM supplements, epidermal growth factor (EGF) and bovine pituitary extract (BPE) and 1% penicillin-streptomycin. PANC-1 cells were cultured in modified-improved minimum essential medium (modified-IMEM, 1 ml) harboring 2 mM L-glutamine, 1% penicillin-streptomycin and 10% heat-inactivated fetal bovine serum (Hi-FBS) and PPCL68 cells were cultured in advanced minimum essential medium (advanced-MEM, 1 ml) having 2 mM L-glutamine, 1% penicillin-streptomycin and 10% heat-inactivated fetal bovine serum (Hi-FBS). For each cell lines, cells were seeded in twelve well plates and allowed to grow for 24 h under humidified environment (CO<sub>2</sub> incubator) at 37 °C with 5% CO<sub>2</sub>.

### 1.3 Metabolite extraction from cells

Culture plates were taken out from the incubator and kept on ice. Media (800 µl) was collected from each well and rest was discarded. After washing with PBS, 300 µl of extraction solvent (100% methanol) was added to cells in each well. Cells were scraped after 5 min and the suspension was transferred to 1.5 ml of micro centrifuge tubes. The tubes were centrifuged at 13,000 rpm at 4 °C for 20 min. The supernatant was collected, dried under nitrogen flow, and stored at -80 °C till further processing.

### 1.4 Metabolite extraction from growth media

Collected media (800 µl) was centrifuged at 13,000 rpm at 4 °C for 20 min to remove cellular debris. Media (500 µl) was collected into fresh micro centrifuge tube, lyophilized, and stored at -80 °C till further processing. Media without cells were incubated and processed under similar conditions and were taken as control.

### 1.5 LC conditions and data acquisition

The mobile phase was composed of water with 0.2% formic acid (solvent A) and acetonitrile with 0.2% formic acid (solvent B). A gradient elution was used over 15 min with a flow rate of 0.4 mL/min: 0-2 min 100% A; 2-8 min 0-100% B; 8-12 min 100% B; 12-14 min 100-0% B and 14-15 min 0% B.

We used six to eight-point calibration curve, generated by serially diluting (in extraction buffer) the main stock (10 µg/ml) in a range of 0.001 ng/ml to 5 µg/ml. The quality and reproducibility of LC-MS data was ensured using several measures. The sample queue was randomized in prior, and solvent blanks were injected between sets of samples to monitor and ensure there was no sample-to-sample carry-over. QC standard was injected periodically (after every 10 sample injections) to monitor shifts in signal intensities

and retention time as measures of reproducibility and to ensure high quality LC-MS data. The coefficient of variation for QC standard was well within permissible limits (<5%). The data were processed using TargetLynx 4.1. The metabolite abundance was calculated by normalizing the peak areas of metabolites to the peak areas of respective internal standard (IS) used for a particular metabolite. Herein, we used 12 internal standards such as valine-d<sub>8</sub>, methionine-<sup>13</sup>C, alanine-<sup>13</sup>C, octanoic acid-<sup>13</sup>C, succinic acid-d<sub>6</sub>, arachidonic acid-d<sub>8</sub>, docosahexenoic acid-d<sub>5</sub>, 4-aminobutyric acid-4,4-d<sub>2</sub>, pyruvic acid-<sup>13</sup>C<sub>3</sub>, malic acid-d<sub>3</sub> and  $\alpha$ -keto glutaric acid-d<sub>4</sub>.

**Supplementary Table S1. List of CCMs, the structures of parent molecules and their corresponding benzimidazole derivatives along with MRM Transitions and other parameters.**

| S. No. | Name                          | Compound (m/z)                                                                      | Derivatized parent (m/z)                                                             | MRM transition Q1>Q3 (CV, CE) | RT   |
|--------|-------------------------------|-------------------------------------------------------------------------------------|--------------------------------------------------------------------------------------|-------------------------------|------|
| 1      | Glyceric acid                 | 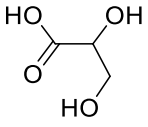   |    | 213.26>196.01 (20, 20)        | 0.71 |
| 2      | Glyoxalic acid                |    |    | 180.913>152 (20, 20)          | 4.02 |
| 3      | Propionic acid                |    |     | 181.259>166.06 (2, 26)        | 4.03 |
| 4      | Pyruvic acid                  |    |    | 194.929>179 (34, 26)          | 4.16 |
| 5      | Alanine                       |    |    | 196.273>181.01 (20, 20)       | 4.16 |
| 6      | 2-Oxo butyric acid            |   |    | 209.270>194.035 (20, 20)      | 4.23 |
| 7      | Malonic acid                  |  |  | 211.243>152.07 (20, 30)       | 3.92 |
| 8      | Serine                        |  |  | 212.270>165.062               | 3.92 |
| 9      | 4-Methyl-2-oxo-pentanoic acid |  |   | 223.216>180 (58, 24)          | 4.82 |
| 10     | Fumaric acid                  |  |  | 223.252>165.061 (20, 40)      | 4.82 |
| 11     | Maleic acid                   |  |   | 245.179>182.998 (44, 26)      | 3.61 |

|    |                              |                                                                                     |                                                                                      |                             |      |
|----|------------------------------|-------------------------------------------------------------------------------------|--------------------------------------------------------------------------------------|-----------------------------|------|
| 12 | Valine                       | 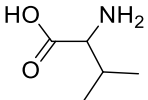   |    | 224.33>165.03<br>(30, 25)   | 4.76 |
| 13 | Succinic acid                |    |    | 225.195>166.01 (20,<br>25)  | 4.05 |
| 14 | Ureidopropionic acid         |    |    | 238.966>166.036 (20,<br>12) | 8.71 |
| 15 | Oxaloacetic acid             |    |    | 239.238>152.03<br>(20, 20)  | 6.16 |
| 16 | Aspartic acid                |   |   | 240.36>165.061<br>(20, 30)  | 4.19 |
| 17 | Malic acid                   |  |  | 240.679>179.032 (20,<br>15) | 3.96 |
| 18 | Homocysteine                 |  |  | 242>209<br>(20, 15)         | 4.19 |
| 19 | $\alpha$ -Keto glutaric acid |  |  | 252.871>152.01 (30,<br>40)  | 4.28 |
| 20 | Glutamine                    |  |  | 253.33>152.04<br>(20, 40)   | 4.28 |

|    |                       |                                                                                     |                                                                                      |                            |      |
|----|-----------------------|-------------------------------------------------------------------------------------|--------------------------------------------------------------------------------------|----------------------------|------|
| 21 | Methionine            | 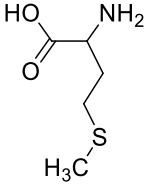   |    | 256.39>152.06<br>(20, 50)  | 5.26 |
| 22 | Orotic acid           |    |    | 263.5>165.062<br>(30, 25)  | 5.49 |
| 23 | 3-Methyl adipic acid  |    |    | 267.114>166.061 (30, 25)   | 5.3  |
| 24 | N-Acetyl glutamine    |    |    | 296.346>165.061 (20, 32)   | 4.79 |
| 25 | Ascorbic acid         |   |   | 301.05>266.01<br>(40, 35)  | 6.36 |
| 26 | 3-Nitrotyrosine       |  |  | 333.37>181.03<br>(10, 30)  | 4.85 |
| 27 | Methylmalonic acid    |  |  | 353.14>180.011<br>(30, 60) | 5.24 |
| 28 | Docosatetraenoic acid |  |  | 439.68>179.035<br>(20, 46) | 7.43 |
| 29 | Palmitic acid         |  |  | 363.345>179.132 (28, 40)   | 7.31 |

|    |                              |                                                                                     |                                                                                      |                          |      |
|----|------------------------------|-------------------------------------------------------------------------------------|--------------------------------------------------------------------------------------|--------------------------|------|
| 30 | Glycine                      | 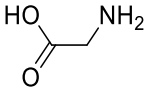   |    | 182.251>166.060 (20, 30) | 4.02 |
| 31 | Sarcosine                    |    |    | 196.273>166.060 (20, 40) | 4.24 |
| 32 | Lactic acid                  |    |    | 196.817>143.802 (2, 24)  | 3.95 |
| 33 | Oxalic acid                  |    |    | 196.972>151.042 (34, 22) | 4.34 |
| 34 | $\gamma$ -Amino butyric acid |    |    | 210.300>166.05 (20, 40)  | 4.44 |
| 35 | 3-Hydrobutyric acid          |    |    | 211.152>179.077 (26, 16) | 5.09 |
| 36 | Threonine                    |   |   | 226.300>166.014 (25, 30) | 4.24 |
| 37 | Cysteine                     |  |  | 228.34>166.036 (25, 22)  | 5.65 |
| 38 | Pyroglutamic acid            |  |  | 236.295>165.996 (30, 30) | 4.89 |
| 39 | Cis-Aconitic acid            |  |  | 281.288>166.06 (20, 40)  | 4.62 |
| 40 | Citric/Isocitric acid        |  |  | 237.259>166.115 (74, 26) | 5.08 |



|    |                           |                                                                                     |                                                                                      |                            |      |
|----|---------------------------|-------------------------------------------------------------------------------------|--------------------------------------------------------------------------------------|----------------------------|------|
| 41 | Glutaconic acid           | 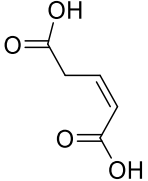   |    | 237.279>166.06<br>(20, 40) | 5.13 |
| 42 | 4-Hydroxy proline         |    |    | 238.966>179.133 (10, 40)   | 4.20 |
| 43 | Asparagine/Glutamic acid  |    |    | 239.299>166.06<br>(20, 40) | 4.26 |
| 44 | Ornithine                 |    |    | 239.299>209.06<br>(20, 40) | 6.28 |
| 45 | Adipic acid               |   |   | 253.16>166.06<br>(20, 40)  | 4.21 |
| 46 | Glutamic acid             |  |  | 366.23>304.053<br>(20, 40) | 6.81 |
| 47 | Mevalonic acid            |  |  | 255.11 > 219.09 (34, 18)   | 3.93 |
| 48 | 2-Hydroxy glutaric acid   |  |  | 255.142>209.101 (46, 18)   | 3.92 |
| 49 | Dihydroorotic acid        |  |  | 265.29>166.06<br>(20, 40)  | 5.62 |
| 50 | 2,2-Dimethylglutaric acid |  |  | 267.35>180.07<br>(20, 40)  | 6.51 |

|    |                             |  |  |                           |      |
|----|-----------------------------|--|--|---------------------------|------|
| 51 | 2-Hydroxy octanoic acid     |  |  | 267.39>182.02<br>(20, 40) | 5.31 |
| 52 | 3-Hydroxy octanoic acid     |  |  | 267.39>250.12<br>(20, 40) | 6.51 |
| 53 | Hippuric acid               |  |  | 286.355>166.062 (60, 60)  | 4.66 |
| 54 | Arginine                    |  |  | 281>166.06<br>(20, 40)    | 4.61 |
| 55 | 10-Undecenoic acid          |  |  | 291.46>166.06<br>(20, 40) | 5.86 |
| 56 | Tridecanoic acid            |  |  | 321.48>166.06<br>(20, 40) | 6.61 |
| 57 | 2/3-Hydroxy dodecanoic acid |  |  | 323.5>166.026<br>(20, 40) | 6.45 |
| 58 | Myristic acid               |  |  | 335.55>166.06<br>(20, 40) | 6.85 |
| 59 | Dodecanedioic acid          |  |  | 337.48>165.96<br>(30, 30) | 5.45 |
| 60 | 3-Hydroxy myristic acid     |  |  | 351.55>166.06<br>(20, 40) | 5.65 |
| 61 | Pentadecanoic acid          |  |  | 349.58>166.06<br>(20, 40) | 7.09 |
| 62 | Palmitoleic acid            |  |  | 361.59>166.06<br>(20, 40) | 6.98 |

|    |                          |  |  |                            |      |
|----|--------------------------|--|--|----------------------------|------|
| 63 | Heptadecenoic acid       |  |  | 375.58>166.06<br>(20, 40)  | 7.19 |
| 64 | Heptadecanoic acid       |  |  | 377.63>166.06<br>(20, 40)  | 7.58 |
| 65 | 16-Hydroxy palmitic acid |  |  | 379.6>166.06<br>(20, 40)   | 6.05 |
| 66 | Linoeliaidic acid        |  |  | 387.345>166.06<br>(20, 40) | 7.23 |
| 67 | Oleic acid/ Elaidic acid |  |  | 389.64>166.06<br>(20, 40)  | 7.45 |
| 68 | Stearic acid             |  |  | 391.66>166.06<br>(20, 40)  | 7.82 |
| 69 | 9-Cis Retinoic acid      |  |  | 407.58>166.06<br>(20, 40)  | 6.46 |
| 70 | Eicosapentaenoic acid    |  |  | 409.63>166.06<br>(20, 40)  | 7.30 |
| 71 | Arachidonic acid         |  |  | 411.65>165.96<br>(30, 30)  | 7.17 |
| 72 | Cis-11-Eicosenoic acid   |  |  | 417.69>166.06<br>(20, 40)  | 7.89 |
| 73 | Docosahexaenoic acid     |  |  | 435.67>166.06<br>(20, 40)  | 6.87 |
| 74 | Heneicosanoic acid       |  |  | 433.74>166.06<br>(20, 40)  | 8.71 |
| 75 | Erucic acid              |  |  | 445.75>166.06<br>(20, 40)  | 8.38 |

|    |                                 |  |  |                           |      |
|----|---------------------------------|--|--|---------------------------|------|
| 76 | 2-Phenyl-2-propyl-succinic acid |  |  | 450.3>166.06<br>(30, 30)  | 9.91 |
| 77 | Valine-d8                       |  |  | 232.23>166.03<br>(30, 25) | 4.71 |
| 78 | Methionine-1-13C                |  |  | 257.3>153.06<br>(20, 50)  | 5.23 |
| 79 | Alanine-13C                     |  |  | 197.25>182.01<br>(20, 20) | 4.18 |
| 80 | Octanoic acid-13C               |  |  | 251.29>153.02<br>(20, 40) | 5.6  |
| 81 | Succinic acid-d6                |  |  | 230.195>168.01 (20, 25)   | 4.25 |
| 82 | Arachidonic acid-d8             |  |  | 418.75>166.96<br>(30, 30) | 7.27 |
| 83 | Docosaheptaenoic acid-d5        |  |  | 439.55>166.96<br>(25, 30) | 7.52 |
| 84 | 4-Aminobutyric acid-4,4-d2      |  |  | 212.18>166.67<br>(28, 30) | 4.52 |
| 85 | Pyruvic acid-13C3               |  |  | 197.83>181<br>(34, 28)    | 4.18 |

|    |                                 |                                                                                   |                                                                                    |                          |      |
|----|---------------------------------|-----------------------------------------------------------------------------------|------------------------------------------------------------------------------------|--------------------------|------|
| 86 | Malic acid-d3                   | 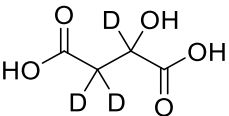 |  | 244.479>182.032 (20, 16) | 3.98 |
| 87 | $\alpha$ -Keto glutaric acid-d4 |  |  | 257.671>152.01 (30, 40)  | 4.31 |

**Supplementary Table S2. Quantitation results of 76 CCMs in human body fluids, tissue, and cell lines (in ng/mL).**

| S. No. | Carboxyl-containing metabolites | Concentration of CCMs in ng/mL |                  |                    |                   |                   |                    |              |
|--------|---------------------------------|--------------------------------|------------------|--------------------|-------------------|-------------------|--------------------|--------------|
|        |                                 | Tissue (10 mg)                 | NIST (2 $\mu$ L) | Plasma (2 $\mu$ L) | Serum (2 $\mu$ L) | Urine (5 $\mu$ L) | Saliva (5 $\mu$ L) | PANC-1 (50K) |
| 1      | Glyceric acid                   | ND                             | 98.12            | 355.40             | 132.66            | 193.07            | 119.00             | 1.1342       |
| 2      | Glyoxalic acid                  | 154.10                         | 11.66            | 32.20              | 46.15             | 22.33             | 110.80             | 0.0332       |
| 3      | Propionic acid                  | 182.18                         | 30.90            | 29.12              | 32.95             | 23.43             | 29.35              | 0.0918       |
| 4      | Pyruvic acid                    | 1105.78                        | 1316.98          | 1973.82            | 2830.12           | 1763.53           | 1132.22            | 7.6327       |
| 5      | Alanine                         | 1304.73                        | 1679.32          | 2121.02            | 4852.65           | 2336.25           | 2689.17            | 7.2958       |
| 6      | 2-Oxo butyric acid              | 3988.87                        | 102.08           | 141.13             | 120.10            | 152.90            | 88.18              | 0.416        |
| 7      | Malonic acid                    | 664.33                         | 168.90           | 211.70             | 102.62            | 173.03            | 110.85             | 0.4858       |
| 8      | Serine                          | 86.45                          | 150.12           | 218.68             | 86.60             | 163.03            | 92.65              | 0.4296       |
| 9      | 4-Methyl-2-oxo-pentanoic acid   | 560.00                         | 237.47           | 99.38              | 79.33             | 161.73            | 161.62             | 1.5342       |
| 10     | Fumaric acid                    | 213.4                          | 84.2             | 64.2               | 96.4              | 65.8              | 69.7               | 0.495        |
| 11     | Maleic acid                     | 912.53                         | 328.42           | 101.28             | 81.36             | 203.17            | 202.50             | 1.8687       |
| 12     | Valine                          | 1362.48                        | 276.18           | 89.13              | 63.78             | 159.32            | 168.82             | 1.4862       |
| 13     | Succinic acid                   | 3028.47                        | 277.80           | 213.00             | 235.63            | 292.37            | 338.43             | 0.729        |
| 14     | Ureidopropionic acid            | 2.50                           | 1.12             | 1.35               | 1.95              | 1.20              | 1.12               | 0.0107       |
| 15     | Oxaloacetic acid                | 525.73                         | 10.75            | 12.18              | 390.53            | 13.26             | 29.30              | ND           |
| 16     | Aspartic acid                   | 1673.23                        | 12.47            | 2.33               | 52.77             | 10.70             | 4.52               | 0.0935       |
| 17     | Malic acid                      | 3134.72                        | 26.68            | 29.60              | 80.67             | 34.72             | 19.18              | 0.1598       |
| 18     | Homocysteine                    | 1392.50                        | 8.77             | ND                 | 33.95             | 15.92             | 0.20               | 0.0532       |
| 19     | $\alpha$ -Keto glutaric acid    | 701.40                         | 33.20            | 4.13               | 55.12             | 23.43             | 3.13               | 0.2932       |
| 20     | Glutamine                       | 642.23                         | 46.65            | 10.07              | 49.97             | 28.00             | 4.87               | 0.2538       |
| 21     | Methionine                      | 2806.95                        | 4734.87          | 8862.48            | 8494.47           | 5466.43           | 3031.80            | 7.7685       |
| 22     | Orotic acid                     | 2444.88                        | 1545.65          | 131.72             | 50.40             | 540.52            | 191.05             | 1.878        |
| 23     | 3-Methyl adipic acid            | 269.53                         | 32.63            | 34.78              | 41.85             | 106.98            | 41.58              | 0.2828       |
| 24     | N-Acetyl glutamine              | 2183.42                        | 333.35           | 201.58             | 211.63            | 237.47            | 107.95             | 1.861        |
| 25     | Ascorbic acid                   | 302.10                         | 248.55           | 663.23             | 344.05            | 178.22            | 95.06              | 0.077        |

|    |                              |         |         |         |         |         |         |         |
|----|------------------------------|---------|---------|---------|---------|---------|---------|---------|
| 26 | 3-Nitrotyrosine              | 4518.22 | 406.68  | 552.67  | 238.15  | 935.85  | 99.08   | 0.8855  |
| 27 | Methylmalonic acid           | ND      | 1140.25 | 3391.00 | 3120.35 | 2113.27 | 640.90  | 1.6825  |
| 28 | Docosatetraenoic acid        | 434.68  | 29.53   | 63.18   | 47.00   | 73.35   | 110.53  | 1.5563  |
| 29 | Palmitic acid                | 6436.25 | 2162.38 | 928.32  | 208.87  | 2523.72 | 3032.07 | 41.3982 |
| 30 | Glycine                      | 199.47  | 22.78   | 18.90   | 24.65   | 15.73   | 11.88   | 0.0773  |
| 31 | Sarcosine                    | 155.50  | 233.53  | 133.62  | 200.55  | 230.53  | 438.27  | 0.3562  |
| 32 | Lactic acid                  | 65.22   | 18.38   | 26.65   | 29.87   | 9.98    | 29.25   | 0.093   |
| 33 | Oxalic acid                  | 899.32  | 166.82  | 146.90  | 379.53  | 125.20  | 85.55   | 0.2363  |
| 34 | $\gamma$ -Amino butyric acid | 86.18   | 78.12   | 18.80   | 124.22  | 41.17   | 10.07   | 0.092   |
| 35 | 3-Hydroxybutyric acid        | 3995.53 | 1199.93 | 1468.93 | 807.88  | 1995.62 | 208.73  | 1.0618  |
| 36 | Threonine                    | 2293.17 | 99.22   | 38.18   | 638.75  | 112.22  | 41.70   | 0.4547  |
| 37 | Cysteine                     | 207.63  | 56.00   | 48.53   | 21.67   | 48.40   | 9.78    | 0.0474  |
| 38 | Pyroglutamic acid            | 401.03  | 43.82   | 18.75   | 43.13   | 89.52   | 32.12   | 0.468   |
| 39 | Cis-Aconitic acid            | 66.17   | 1.87    | 0.28    | 5.15    | 0.15    | ND      | 0.0064  |
| 40 | Citric/Isocitric acid        | 1636.68 | 426.05  | 293.03  | 217.20  | 294.13  | 257.07  | 5.681   |
| 41 | Glutaconic acid              | 2027.37 | 459.38  | 321.40  | 227.28  | 327.50  | 272.02  | 6.6508  |
| 42 | 4-Hydroxy proline            | 1086.52 | 11.20   | 4.03    | 30.67   | 7.13    | 3.55    | 0.0872  |
| 43 | Asparagine/Glutaric acid     | 987.37  | 10.02   | 7.88    | 37.13   | 8.70    | 5.20    | 0.070   |
| 44 | Ornithine                    | 1067.32 | 43.70   | 17.28   | 92.65   | 38.20   | 19.13   | 0.2073  |
| 45 | Adipic acid                  | 347.13  | 23.75   | 5.27    | 35.43   | 15.85   | 4.95    | 0.2353  |
| 46 | Glutamic acid                | 46.95   | 145.82  | 222.68  | 182.57  | 142.23  | 194.20  | 0.3415  |
| 47 | Mevalonic acid               | 5.13    | 1.08    | 0.95    | 3.67    | 2.57    | 0.20    | 0.002   |
| 48 | 2-Hydroxy glutaric acid      | ND      | 14.08   | 7.60    | 14.45   | 11.90   | 7.12    | 0.0522  |
| 49 | Dihydroorotic acid           | 2778.13 | 2525.03 | 2960.85 | 2537.67 | 2627.30 | 2551.38 | 18.282  |
| 50 | 2,2-Dimethylglutaric acid    | 39.80   | 29.62   | 32.67   | 22.12   | 25.78   | 25.37   | 0.1993  |
| 51 | 2-Hydroxy octanoic acid      | 1.71    | 1.50    | 1.48    | 1.56    | 1.48    | 1.38    | 0.0139  |

|                   |                                 |         |         |         |        |         |         |         |
|-------------------|---------------------------------|---------|---------|---------|--------|---------|---------|---------|
| 52                | 3-Hydroxy octanoic acid         | 212.12  | 45.08   | 28.10   | 38.32  | 73.38   | 45.75   | 0.4668  |
| 53                | Hippuric acid                   | 168.95  | 100.07  | 170.97  | 61.27  | 118.27  | 135.63  | 0.5823  |
| 54                | Arginine                        | 59.13   | 4.92    | 3.33    | 7.87   | 3.10    | 1.85    | 0.0372  |
| 55                | 10-Undecenoic acid              | 7.27    | 5.78    | 6.32    | 3.92   | 4.72    | 7.43    | 0.0438  |
| 56                | Tridecanoic acid                | 89.27   | 150.90  | 161.78  | 117.43 | 113.92  | 102.97  | 0.7718  |
| 57                | 2/3-Hydroxy dodecanoic acid     | 3.18    | 3.32    | 3.53    | 2.67   | 2.27    | 2.40    | 0.0167  |
| 58                | Myristic acid                   | 389.10  | 207.17  | 248.07  | 162.40 | 219.13  | 205.63  | 2.1272  |
| 59                | Dodecanedioic acid              | 2870.18 | 148.65  | 130.38  | 72.82  | 111.03  | 57.60   | 5.2045  |
| 60                | 3-Hydroxy myristic acid         | 59.78   | 8.05    | 6.57    | 6.53   | 5.38    | 6.70    | 0.0928  |
| 61                | Pentadecanoic acid              | 739.93  | 477.18  | 457.40  | 350.88 | 417.22  | 469.80  | 5.7507  |
| 62                | Palmitoleic acid                | 456.73  | 71.02   | 15.98   | 12.60  | 37.52   | 118.72  | 1.9232  |
| 63                | Heptadecenoic acid              | 158.18  | 44.48   | 12.52   | 3.72   | 16.53   | 48.87   | 0.974   |
| 64                | Heptadecanoic acid              | 1547.23 | 556.53  | 299.08  | 217.70 | 372.70  | 669.23  | 5.6572  |
| 65                | 16-Hydroxy palmitic acid        | 71.15   | 9.88    | 8.12    | 8.10   | 6.72    | 8.30    | 0.1133  |
| 66                | Linoelaidic acid                | 7997.12 | 951.87  | 276.58  | 23.97  | 431.35  | 729.05  | 3.8245  |
| 67                | Oleic acid/ Elaidic acid        | 6208.93 | 3711.07 | 623.55  | 64.35  | 1386.43 | 3895.68 | 33.125  |
| 68                | Stearic acid                    | 5236.50 | 2637.82 | 1495.55 | 582.73 | 2293.77 | 3426.10 | 24.2295 |
| 69                | 9-Cis Retinoic acid             | 56.20   | 6.47    | 4.70    | 3.20   | 4.73    | 1.95    | 0.044   |
| 70                | Eicosapentoic acid              | 458.93  | 40.35   | 32.30   | 137.27 | 26.88   | 22.82   | 0.4723  |
| 71                | Arachidonic acid                | 718.98  | 191.85  | 31.30   | 4.53   | 139.32  | 94.70   | 1.4938  |
| 72                | Cis-11-Eicosenoic acid          | 1341.63 | 363.13  | 187.38  | 57.55  | 322.00  | 1472.93 | 4.5103  |
| 73                | Docosahexanoic acid             | 47.62   | 8.44    | 10.97   | 4.20   | 2.28    | 4.80    | 0.3647  |
| 74                | Heneicosanoic acid              | 312.67  | 44.75   | 38.18   | 16.28  | 56.07   | 167.02  | 1.5405  |
| 75                | Erucic acid                     | 1508.10 | 320.70  | 71.97   | 8.55   | 178.43  | 2324.15 | 2.5322  |
| 76                | 2-Phenyl-2-propyl-succinic acid | 3684.73 | 886.83  | 857.35  | 806.33 | 663.23  | 497.13  | 20.3593 |
| ND = not detected |                                 |         |         |         |        |         |         |         |



**Supplementary Table 3.** List of metabolites with respective MRM transitions, retention time (RT), limit of detection (LOD), linearity range, single to noise (S/N) ratio and  $r^2$  values.

| S. No. | Name of Metabolite            | MRM trace       | RT (min) | LOD (ng/mL) | Linearity range (ng/mL) | S/N at LOD | $r^2$ value |
|--------|-------------------------------|-----------------|----------|-------------|-------------------------|------------|-------------|
| 1      | Glyceric acid                 | 213.26>196.01   | 0.71     | 0.25        | 2.5-3000                | 1554       | 0.997       |
| 2      | Glyoxalic acid                | 180.913>152.000 | 4.02     | 1           | 5.0-3000                | 10.6       | 0.999       |
| 3      | Propionic acid                | 181.259>166.060 | 4.03     | 0.5         | 5.0-3000                | 31         | 0.998       |
| 4      | Pyruvic acid                  | 194.929>179     | 4.16     | 1           | 10.0-3000               | 2589       | 0.999       |
| 5      | Alanine                       | 196.273>181.01  | 4.16     | 1           | 5.0-3000                | 275        | 0.998       |
| 6      | 2-Oxo butyric acid            | 209.270>194.035 | 4.23     | 0.5         | 2.5-3000                | 130        | 0.993       |
| 7      | Malonic acid                  | 211.143>152.07  | 3.92     | 0.01        | 1.0-3000                | 184        | 0.999       |
| 8      | Serine                        | 212.270>165.062 | 3.92     | 1           | 5.0-3000                | 31         | 0.999       |
| 9      | 4-Methyl-2-oxo-pentanoic acid | 223.216>180     | 4.82     | 0.01        | 10.0-5000               | 1133       | 0.996       |
| 10     | Fumaric acid                  | 223.252>165.061 | 4.82     | 0.01        | 10.0-5000               | 1296       | 0.999       |
| 11     | Maleic acid                   | 245.179>182.998 | 3.61     | 0.05        | 10.0-5000               | 734        | 0.996       |
| 12     | Valine                        | 224.33>165.063  | 4.76     | 0.05        | 5.0-3000                | 291        | 0.997       |
| 13     | Succinic acid                 | 225.195>166.01  | 4.05     | 0.1         | 1.0-3000                | 46         | 0.999       |
| 14     | Ureidopropionic acid          | 238.966>166.036 | 8.71     | 5           | 5.0-3000                | 51         | 0.999       |
| 15     | Oxaloacetic acid              | 239.238>152.02  | 6.16     | 5           | 50.0-3000               | 6.7        | 0.999       |
| 16     | Aspartic acid                 | 240.36>165.061  | 4.19     | 0.1         | 1.0-3000                | 56         | 0.999       |
| 17     | Malic acid                    | 240.679>179.032 | 3.96     | 0.1         | 1.0-3000                | 23         | 0.998       |
| 18     | Homocysteine                  | 242.00>209.00   | 4.19     | 0.1         | 1.0-3000                | 65         | 0.998       |
| 19     | $\alpha$ -Keto glutaric acid  | 252.871>152.01  | 4.28     | 1           | 5.0-3000                | 30         | 0.999       |
| 20     | Glutamine                     | 253.33>152.04   | 4.28     | 0.5         | 5.0-3000                | 105        | 0.999       |
| 21     | Methionine                    | 256.39>152.06   | 5.26     | 0.5         | 7.5-3000                | 44         | 0.999       |
| 22     | Orotic acid                   | 263.50>165.062  | 5.49     | 0.01        | 1.0-3000                | 113        | 0.998       |
| 23     | 3-Methyl adipic acid          | 267.114>166.061 | 5.30     | 0.1         | 1.0-3000                | 2670       | 0.999       |
| 24     | N-Acetyl glutamine            | 296.346>165.061 | 4.79     | 0.5         | 5.0-3000                | 9          | 0.999       |
| 25     | Ascorbic acid                 | 301.05>266.01   | 6.36     | 0.01        | 10.0-3000               | 1313       | 0.999       |
| 26     | 3-Nitrotyrosine               | 333.37>181.03   | 4.85     | 0.01        | 10.0-3000               | 152        | 0.999       |
| 27     | Methylmalonic acid            | 353.14>180.011  | 5.24     | 0.1         | 10.0-3000               | 55         | 0.999       |
| 28     | Docosatetraenoic acid         | 439.68>179.035  | 7.43     | 0.025       | 10.0-3000               | 81         | 0.999       |
| 29     | Palmitic acid                 | 363.345>179.132 | 7.31     | 0.075       | 10.0-3000               | 345        | 0.999       |
| 30     | Glycine                       | 182.251>166.060 | 4.02     | 0.1         | 1.0-3000                | 9.6        | 0.999       |
| 31     | Sarcosine                     | 196.273>166.060 | 4.24     | 0.01        | 2.5-3000                | 105        | 0.999       |
| 32     | Lactic acid                   | 196.817>143.802 | 3.95     | 0.01        | 0.1-3000                | 30         | 0.999       |

|    |                              |                 |      |       |           |      |       |
|----|------------------------------|-----------------|------|-------|-----------|------|-------|
| 33 | Oxalic acid                  | 196.972>151.042 | 4.34 | 0.01  | 1.0-3000  | 48   | 0.997 |
| 34 | $\gamma$ -Amino butyric acid | 210.300>166.051 | 4.44 | 0.05  | 0.5-3000  | 50   | 0.997 |
| 35 | 3-Hydroxybutyric acid        | 211.152>179.077 | 5.09 | 0.01  | 1.0-2000  | 684  | 0.999 |
| 36 | Threonine                    | 226.300>166.014 | 4.24 | 0.01  | 1.0-3000  | 42   | 0.998 |
| 37 | Cysteine                     | 228.34>166.036  | 5.65 | 0.25  | 1.0-3000  | 5.8  | 0.999 |
| 38 | Pyroglutamic acid            | 236.295>165.996 | 4.89 | 2.5   | 25.0-3000 | 5    | 0.999 |
| 39 | Cis-Aconitic acid            | 281.288>166.06  | 4.62 | 0.05  | 5.0-1000  | 119  | 0.999 |
| 40 | Citric/Isocitric acid        | 237.259>166.115 | 5.08 | 0.001 | 5.0-3000  | 91   | 0.999 |
| 41 | Glutaconic acid              | 237.279>166.06  | 5.13 | 0.01  | 10.0-5000 | 3280 | 0.994 |
| 42 | 4-Hydroxy proline            | 238.966>179.133 | 4.20 | 0.001 | 0.5-3000  | 89   | 0.991 |
| 43 | Asparagine/Glutaric acid     | 239.299>166.06  | 4.21 | 0.5   | 1.0-3000  | 17   | 0.996 |
| 44 | Ornithine                    | 239.299>209.06  | 6.28 | 0.01  | 10-5000   | 94   | 0.997 |
| 45 | Adipic acid                  | 253.16>166.06   | 4.21 | 0.05  | 5.0-3000  | 31   | 0.996 |
| 46 | Glutamic acid                | 366.23>304.053  | 6.81 | 0.01  | 7.5-3000  | 1029 | 0.992 |
| 47 | Mevalonic acid               | 255.11 > 219.09 | 3.93 | 0.05  | 5.0-3000  | 30   | 0.994 |
| 48 | 2-Hydroxy glutaric acid      | 255.142>209.101 | 3.92 | 0.01  | 0.1-3000  | 17   | 0.998 |
| 49 | Dihydroorotic acid           | 265.29>166.06   | 5.62 | 0.01  | 10.0-3000 | 774  | 0.999 |
| 50 | 2,2-Dimethylglutaric acid    | 267.35>180.07   | 6.51 | 0.01  | 10.0-5000 | 86   | 0.998 |
| 51 | 2-Hydroxy octanoic acid      | 267.39>182.02   | 5.70 | 0.01  | 1.0-10000 | 431  | 0.994 |
| 52 | 3-Hydroxy octanoic acid      | 267.39>250.12   | 6.51 | 0.01  | 5.0-10000 | 291  | 0.994 |
| 53 | Hippuric acid                | 286.355>166.062 | 4.66 | 0.01  | 5.0-1000  | 57   | 0.996 |
| 54 | Arginine                     | 281>166.06      | 4.61 | 0.1   | 5.0-250   | 86.7 | 0.999 |
| 55 | 10-Undecenoic acid           | 291.46>166.06   | 5.86 | 0.05  | 5.0-3000  | 63   | 0.998 |
| 56 | Tridecanoic acid             | 321.48>166.06   | 6.61 | 0.01  | 0.5-3000  | 72   | 0.999 |
| 57 | 2/3-Hydroxy dodecanoic acid  | 323.5>166.026   | 6.45 | 0.1   | 5.0-3000  | 15.9 | 0.999 |
| 58 | Myristic acid                | 335.55>166.06   | 6.85 | 0.01  | 1.0-3000  | 142  | 0.996 |
| 59 | Dodecanedioic acid           | 337.48>165.96   | 5.45 | 0.1   | 1.0-3000  | 12   | 0.999 |
| 60 | 3-Hydroxy myristic acid      | 351.55>166.06   | 5.65 | 0.05  | 5.0-3000  | 219  | 0.992 |
| 61 | Pentadecanoic acid           | 349.58>166.06   | 7.09 | 0.01  | 0.5-3000  | 306  | 0.997 |
| 62 | Palmitoleic acid             | 361.59>166.06   | 6.98 | 0.01  | 1.0-3000  | 12.9 | 0.997 |
| 63 | Heptadecenoic acid           | 375.58>166.06   | 7.19 | 0.1   | 5.0-3000  | 19.5 | 0.997 |
| 64 | Heptadecanoic acid           | 377.63>166.06   | 7.58 | 0.01  | 1.0-3000  | 260  | 0.997 |
| 65 | 16-Hydroxy palmitic acid     | 379.6>166.06    | 6.05 | 0.05  | 5.0-3000  | 89   | 0.997 |
| 66 | Linoelaidic acid             | 387.63>166.06   | 7.23 | 5     | 5.0-3000  | 7.9  | 0.999 |
| 67 | Oleic acid/ Elaidic acid     | 389.64>166.06   | 7.45 | 0.01  | 0.5-3000  | 50   | 0.999 |
| 68 | Stearic acid                 | 391.66>166.06   | 7.82 | 0.01  | 10.0-3000 | 23   | 0.997 |
| 69 | 9-Cis Retinoic acid          | 407.58>166.06   | 6.46 | 0.01  | 5.0-3000  | 10   | 0.999 |
| 70 | Eicosapentoic acid           | 409.63>166.06   | 7.30 | 5     | 5.0-3000  | 11.7 | 0.998 |
| 71 | Arachidonic acid             | 411.65>165.96   | 7.17 | 0.05  | 5.0-3000  | 19   | 0.994 |

|    |                                 |               |      |      |           |     |       |
|----|---------------------------------|---------------|------|------|-----------|-----|-------|
| 72 | Cis-11-Eicosenoic acid          | 417.69>166.06 | 7.89 | 0.1  | 5.0-3000  | 12  | 0.998 |
| 73 | Docosahexanoic acid             | 435.67>166.06 | 6.87 | 0.05 | 5.0-3000  | 36  | 0.999 |
| 74 | Heneicosanoic acid              | 433.74>166.06 | 8.71 | 0.1  | 5.0-3000  | 25  | 0.999 |
| 75 | Erucic acid                     | 445.75>166.06 | 8.38 | 0.01 | 5.0-3000  | 327 | 0.999 |
| 76 | 2-Phenyl-2-propyl-succinic acid | 450.3>166.06  | 9.91 | 0.01 | 10.0-3000 | 56  | 0.998 |

**Supplementary Figure S1. LC Chromatogram of selected carboxylic acids**

20201026\_acidomics\_method\_MS\_0025 Smooth(Mn,2x1)  
Cal curve 021\_100\_ng/mL

F9:MRM of 1 channel,ES+  
213.26 > 196.01  
7.051e+006

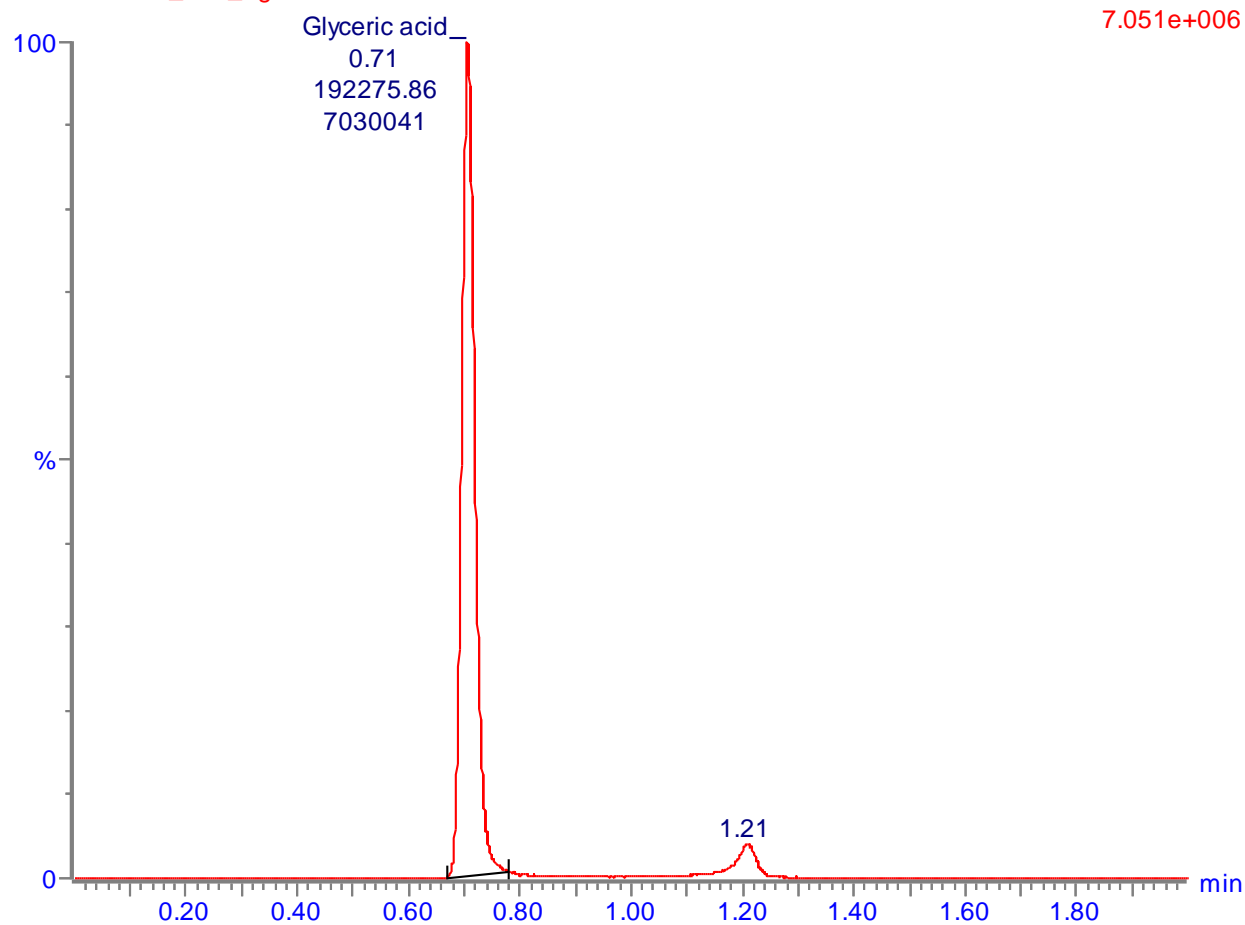

20201026\_acidomics\_method\_MS\_0025 Smooth(Mn,2x1)  
Cal curve 021\_100\_ng/mL

F2:MRM of 2 channels,ES+  
180.913 > 152  
9.063e+004

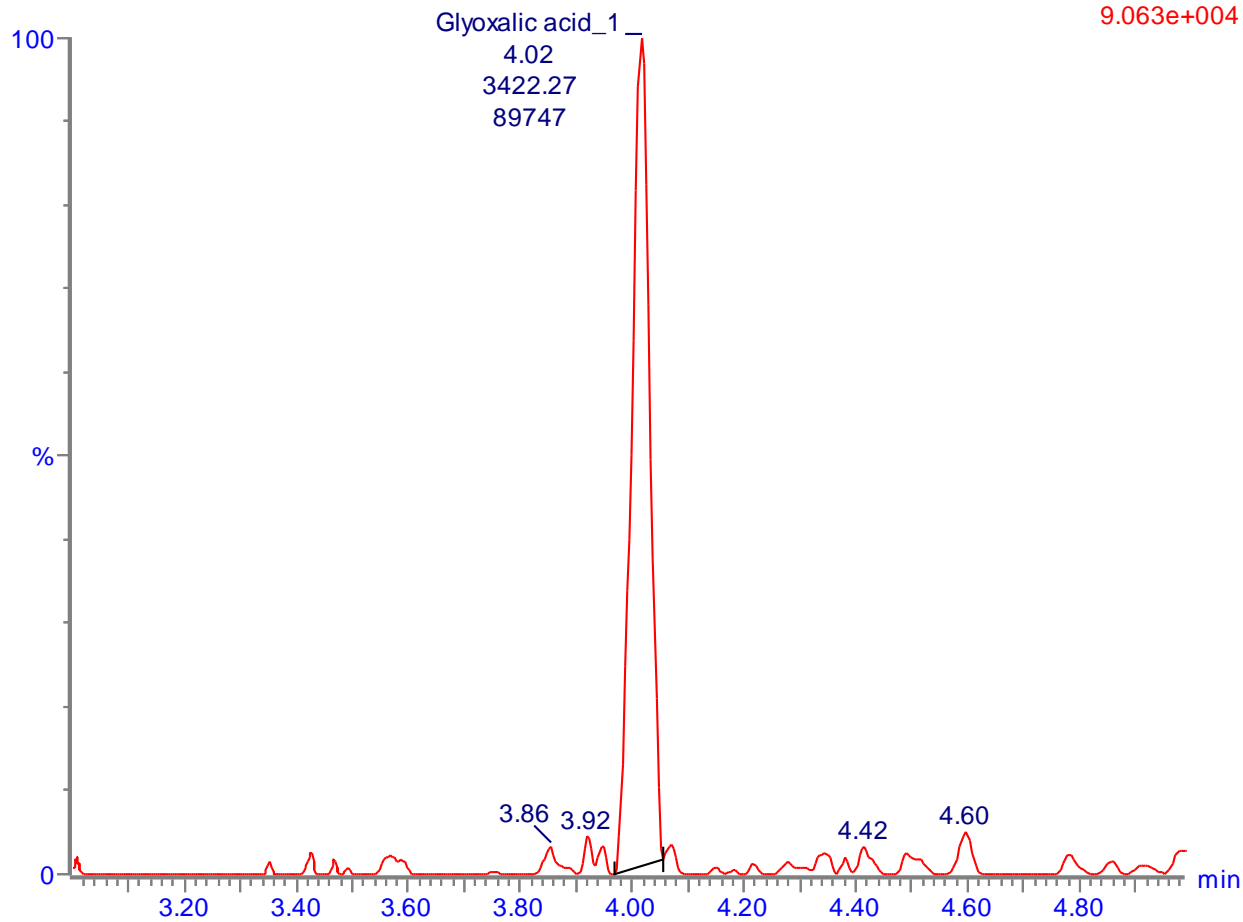

20201026\_acidomics\_method\_MS\_0025 Smooth(Mn,2x1)  
Cal curve 021\_100\_ng/mL

F3:MRM of 2 channels,ES+  
181.05 > 152.9  
1.317e+007

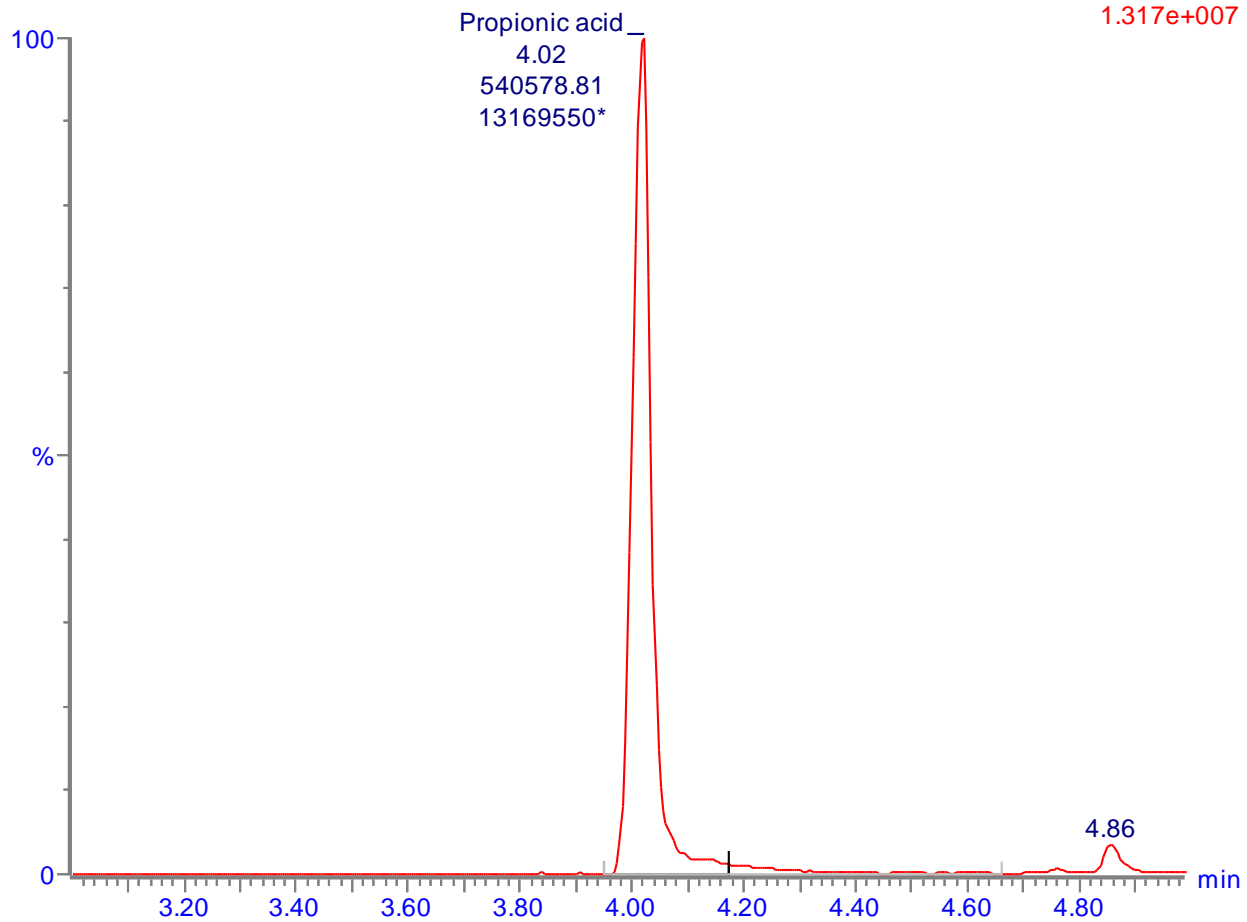

20201026\_acidomics\_method\_MS\_0025 Smooth(Mn,2x1)  
Cal curve 021\_100\_ng/mL

F4:MRM of 2 channels,ES+  
194.929 > 179  
2.315e+007

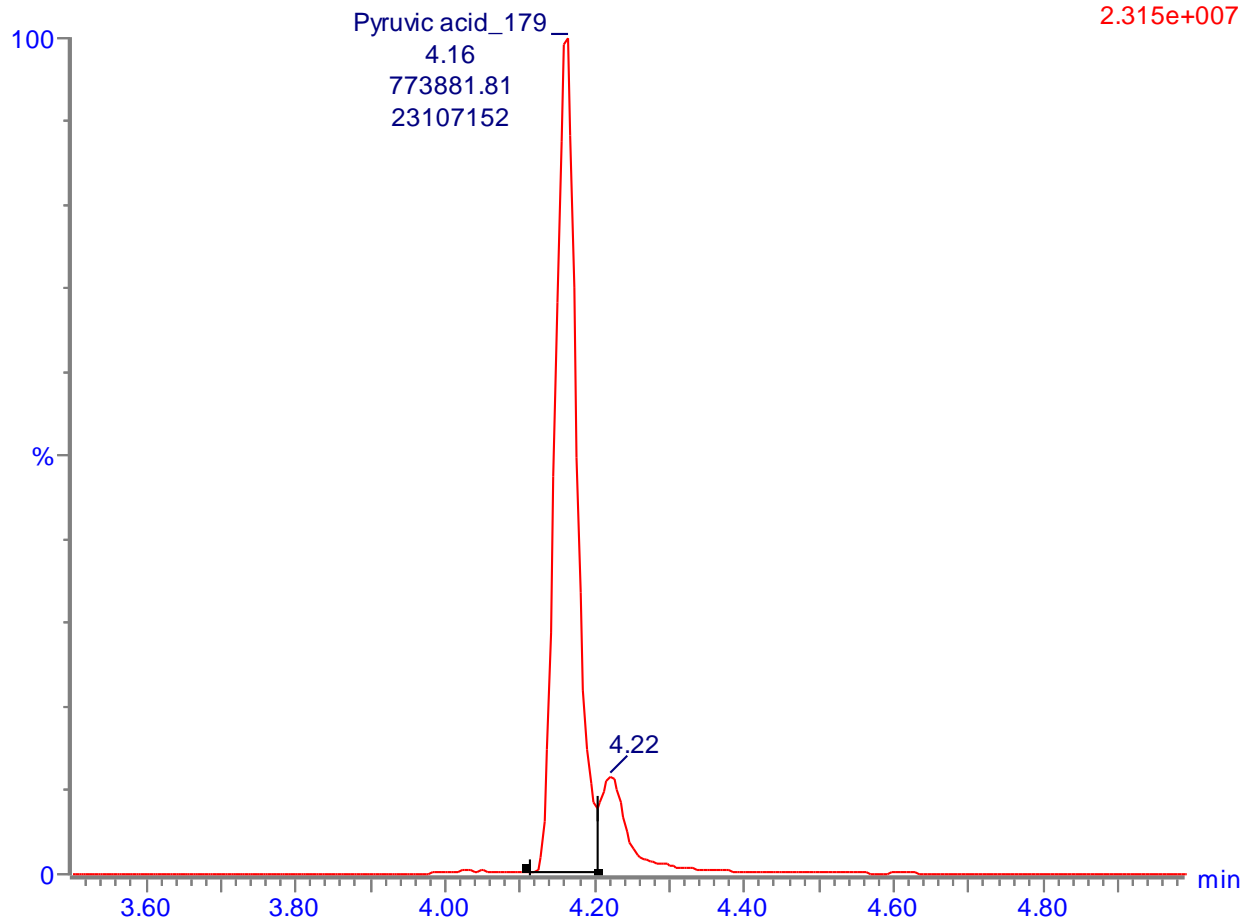

20201026\_acidomics\_method\_MS\_0025 Smooth(Mn,2x1)  
Cal curve 021\_100\_ng/mL

F5:MRM of 1 channel,ES+  
196.274 > 181.01  
1.967e+006

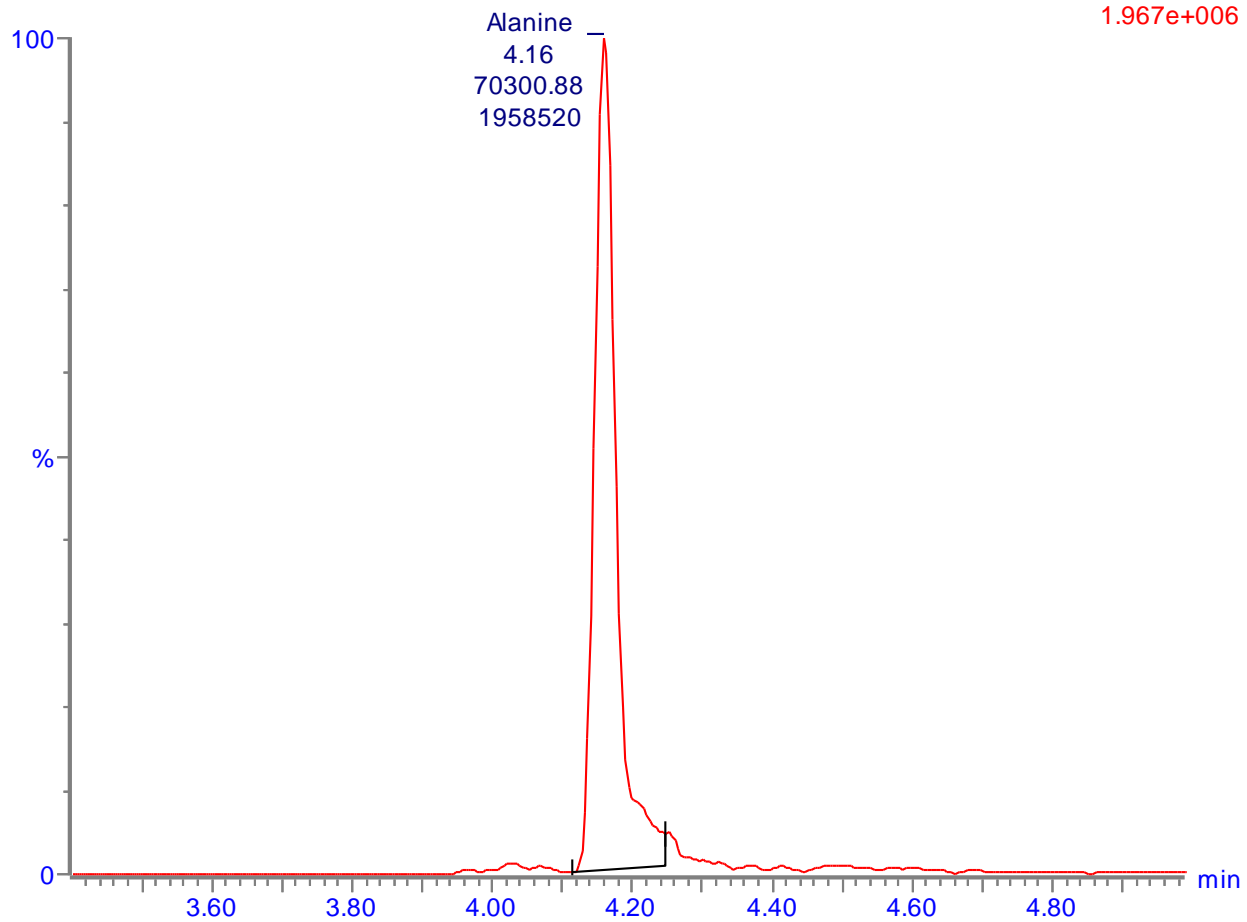



20201026\_acidomics\_method\_MS\_0025 Smooth(Mn,2x1)  
Cal curve 021\_100\_ng/mL

F6:MRM of 1 channel,ES+  
209.27 > 194.035  
4.584e+006

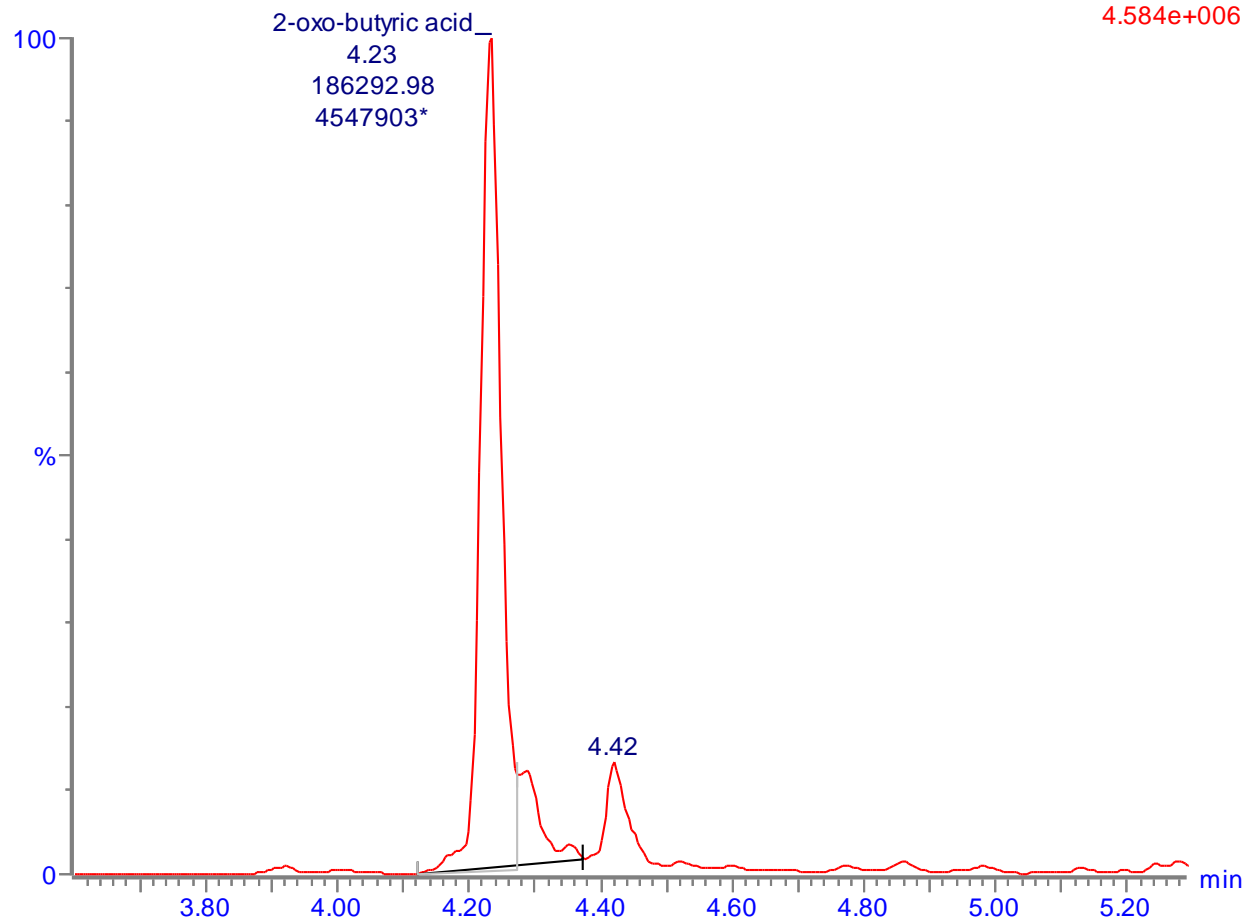

20201026\_acidomics\_method\_MS\_0025 Smooth(Mn,2x1)  
Cal curve 021\_100\_ng/mL

F7:MRM of 2 channels,ES+  
211.243 > 152.07  
1.298e+006

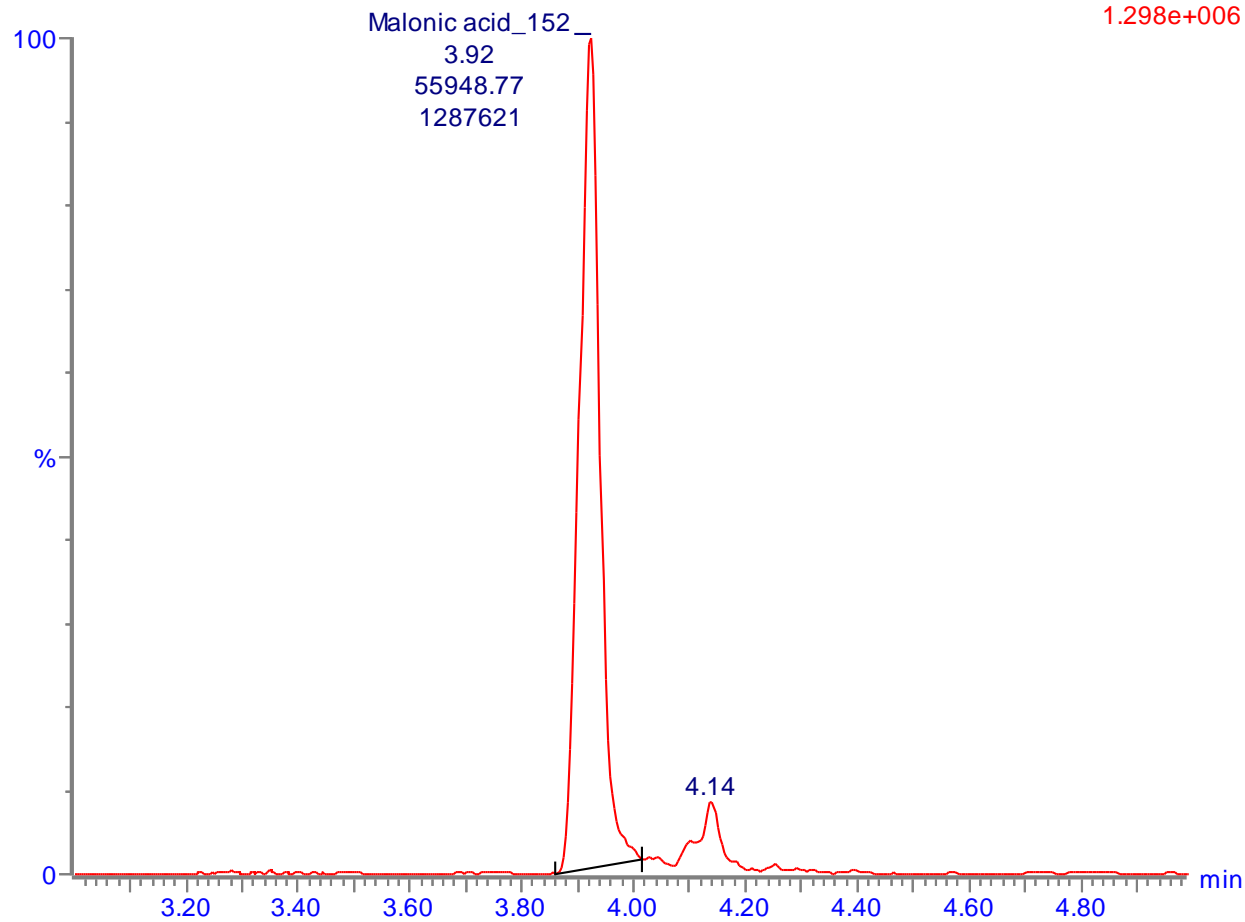

20201026\_acidomics\_method\_MS\_0025 Smooth(Mn,2x1)  
Cal curve 021\_100\_ng/mL

F8:MRM of 2 channels,ES+  
212.27 > 165.062  
2.552e+005

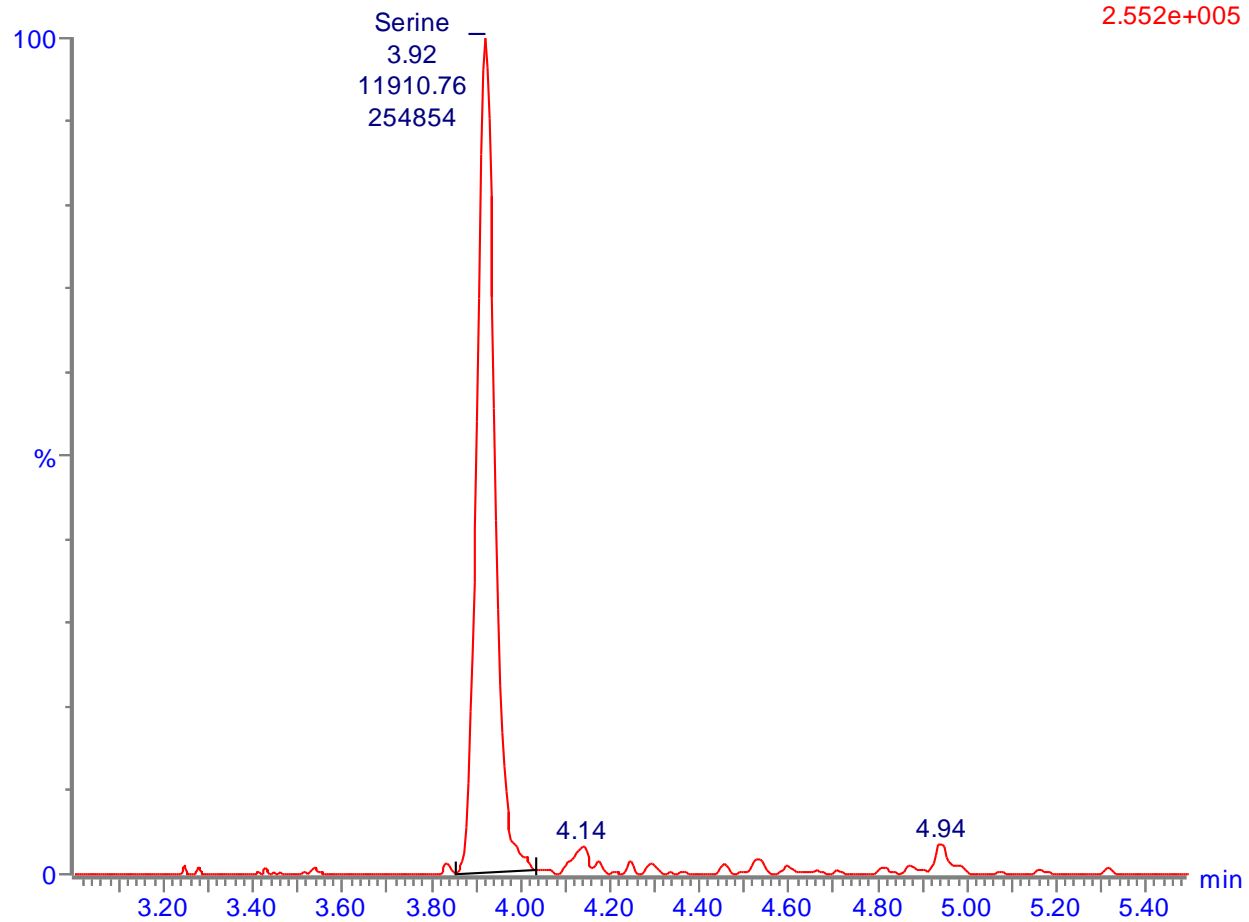

20210504\_acidomics\_cells\_experiment\_0009 Smooth(Mn,2x3)  
Cal curve 008\_500\_ng/mL

F2:MRM of 1 channel, ES+  
223.216 > 180  
2.580e+006

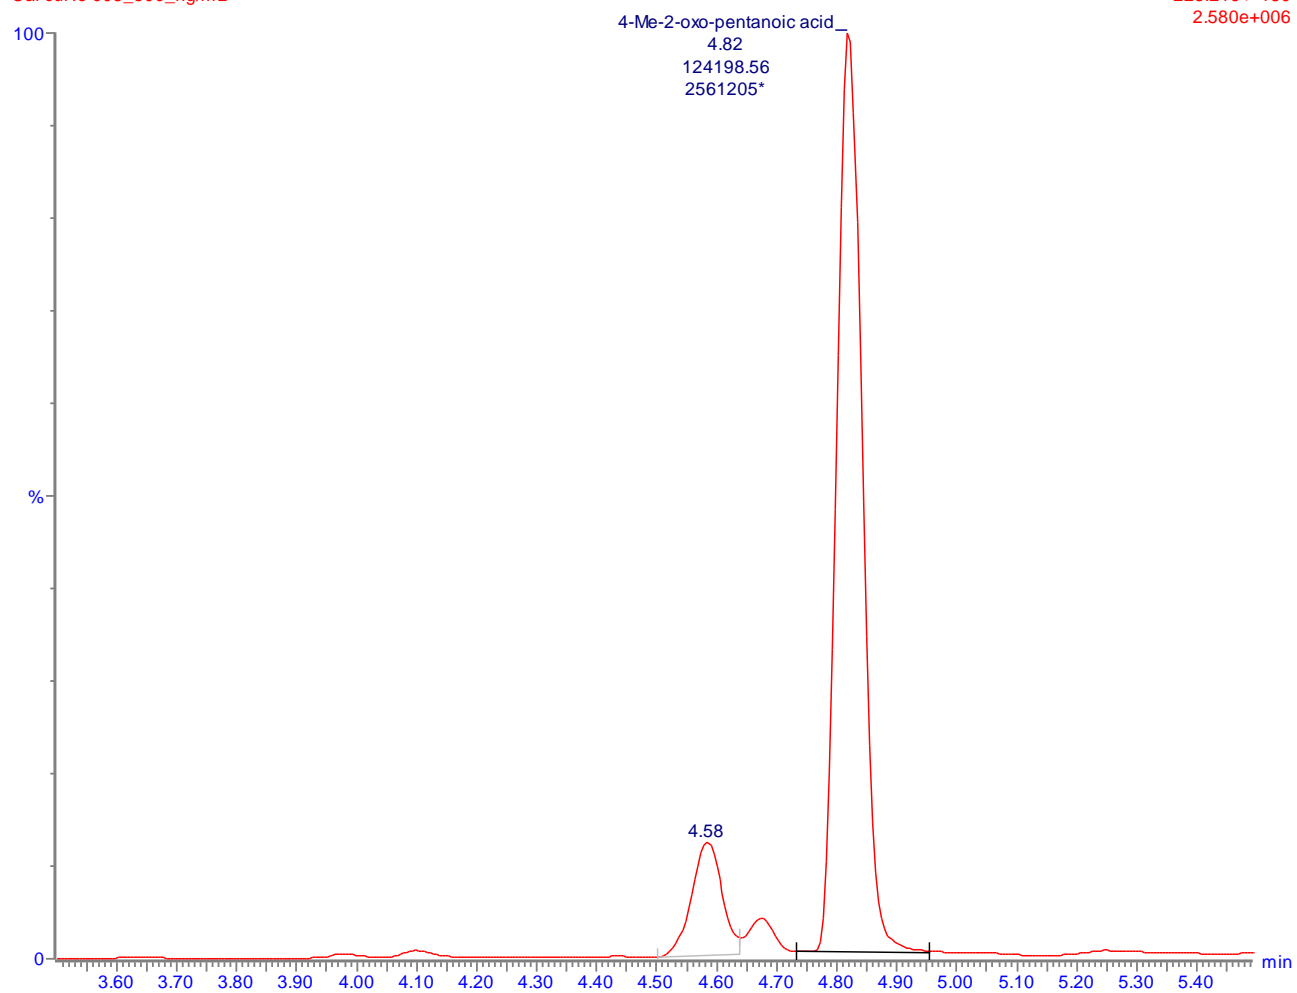

20210504\_acidomics\_cells\_experiment\_0009 Smooth(Mn,2x3)  
Cal curve 008\_500\_ng/mL

F1:MRM of 1 channel,ES+  
223.03 > 165  
1.112e+007

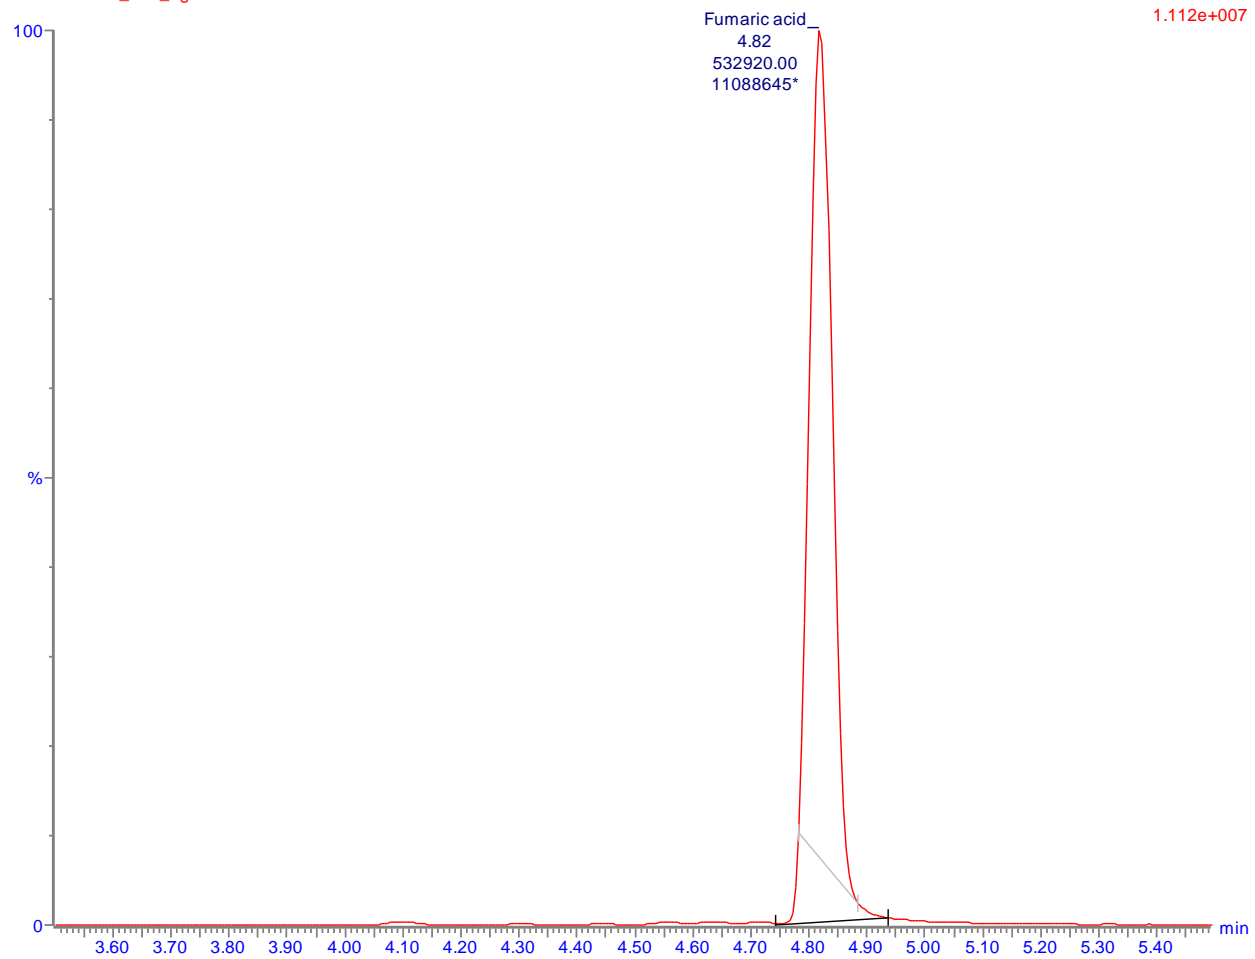

20210504\_acidomics\_cells\_experiment\_0009 Smooth(Mn,2x3)  
Cal curve 008\_500\_ng/mL

F8:MRM of 1 channel,ES+  
245.179 > 182.998  
1.118e+007

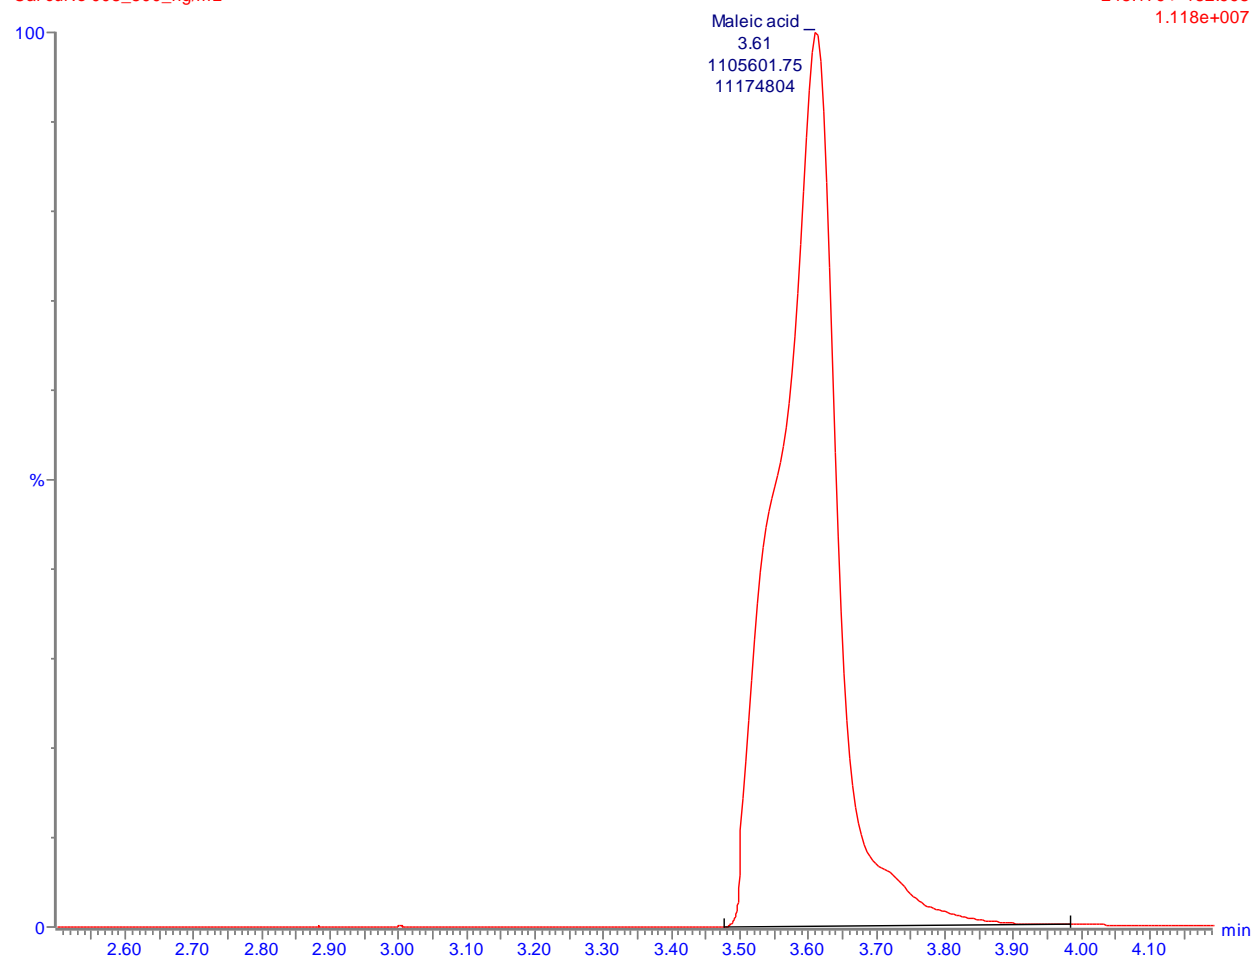

20201026\_acidomics\_method\_MS\_0025 Smooth(Mn,2x1)  
Cal curve 021\_100\_ng/mL

F12:MRM of 1 channel,ES+  
224.33 > 165.03  
1.707e+006

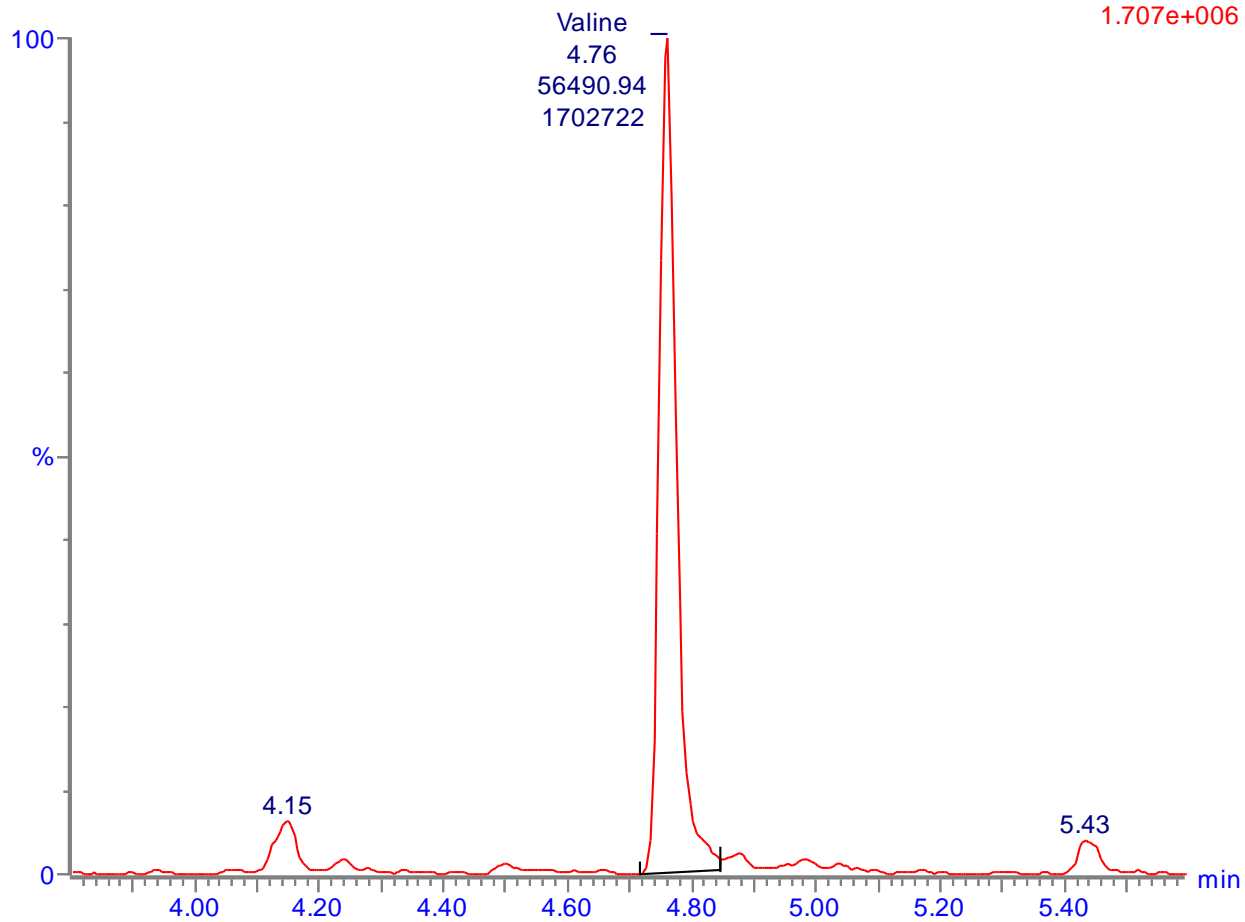

20201026\_acidomics\_method\_MS\_0025 Smooth(Mn,2x1)  
Cal curve 021\_100\_ng/mL

F13:MRM of 1 channel,ES+  
225.195 > 166.01  
9.035e+005

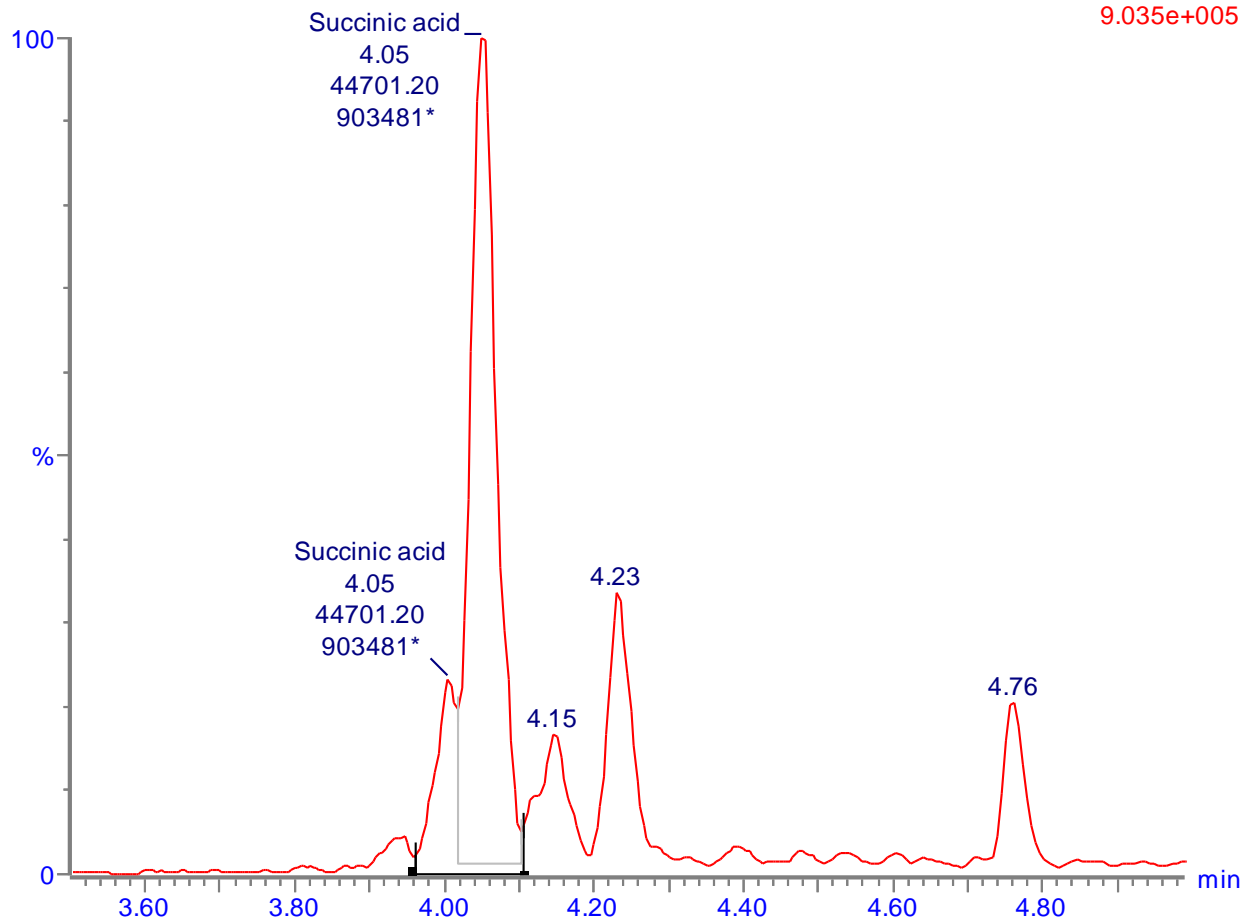



20201026\_acidomics\_method\_MS\_0025 Smooth(Mn,2x1)  
Cal curve 021\_100\_ng/mL

F17:MRM of 1 channel,ES+  
238.966 > 166.036  
2.522e+005

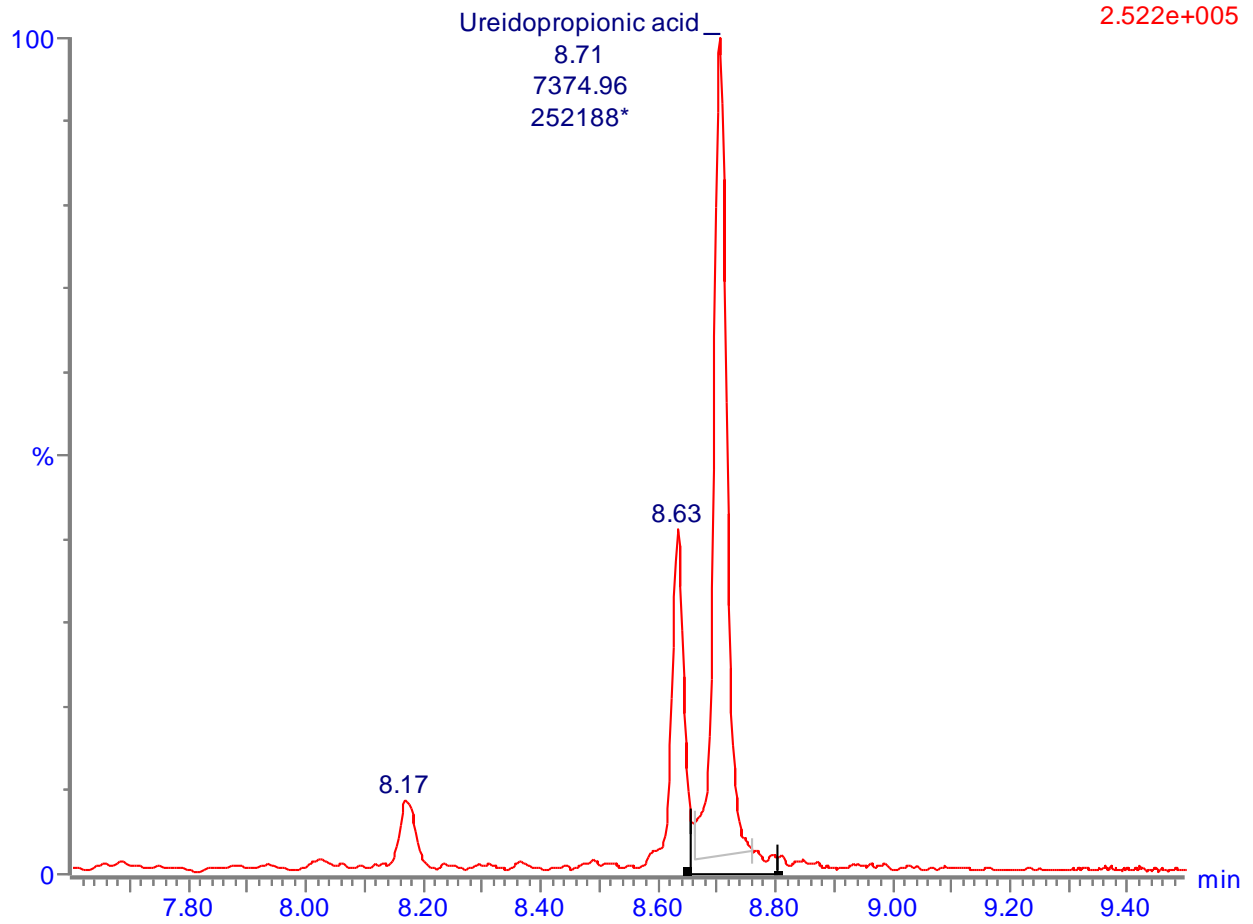

20201026\_acidomics\_method\_MS\_0029 Smooth(Mn,2x1)  
Cal curve 025\_1000\_ng/mL

F18:MRM of 2 channels,ES+  
239.238 > 152.02  
1.090e+006

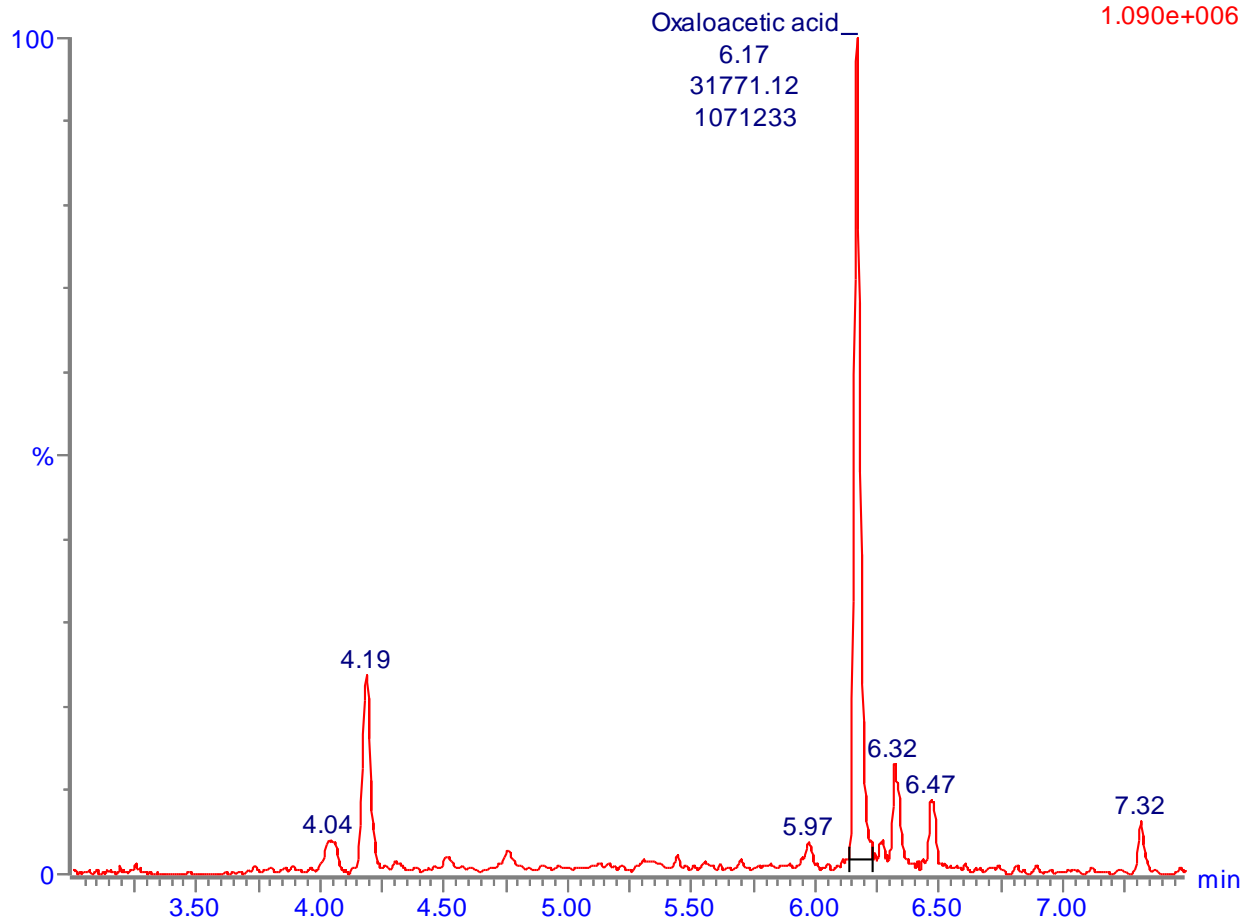

20201026\_acidomics\_method\_MS\_0025 Smooth(Mn,2x1)  
Cal curve 021\_100\_ng/mL

F21:MRM of 1 channel,ES+  
240.28 > 165.061  
4.536e+006

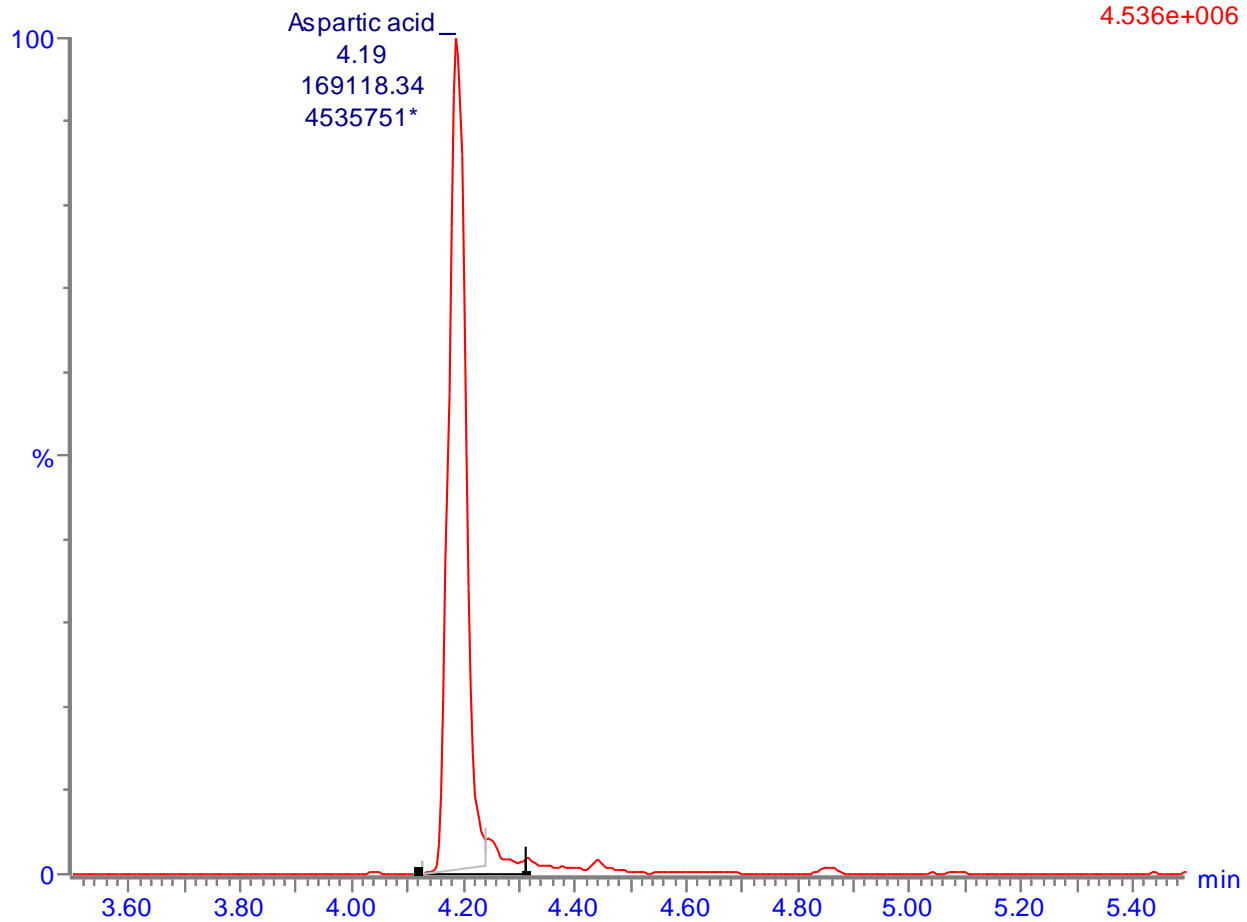

20201026\_acidomics\_method\_MS\_0029 Smooth(Mn,2x1)  
Cal curve 025\_1000\_ng/mL

F22:MRM of 1 channel,ES+  
241 > 179.032  
7.295e+006

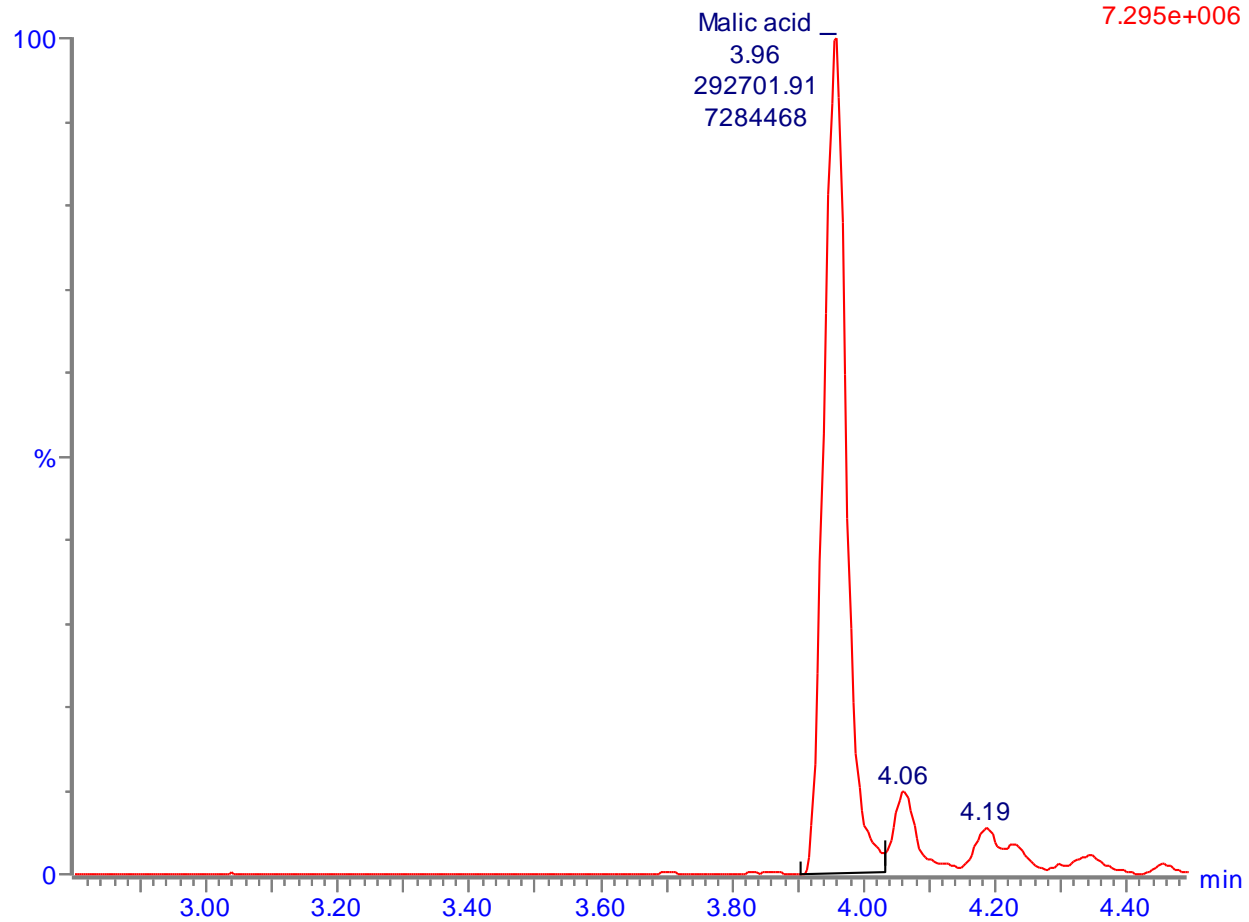

20201026\_acidomics\_method\_MS\_0025 Smooth(Mn,2x1)  
Cal curve 021\_100\_ng/mL

F23:MRM of 1 channel,ES+  
242 > 209  
6.165e+005

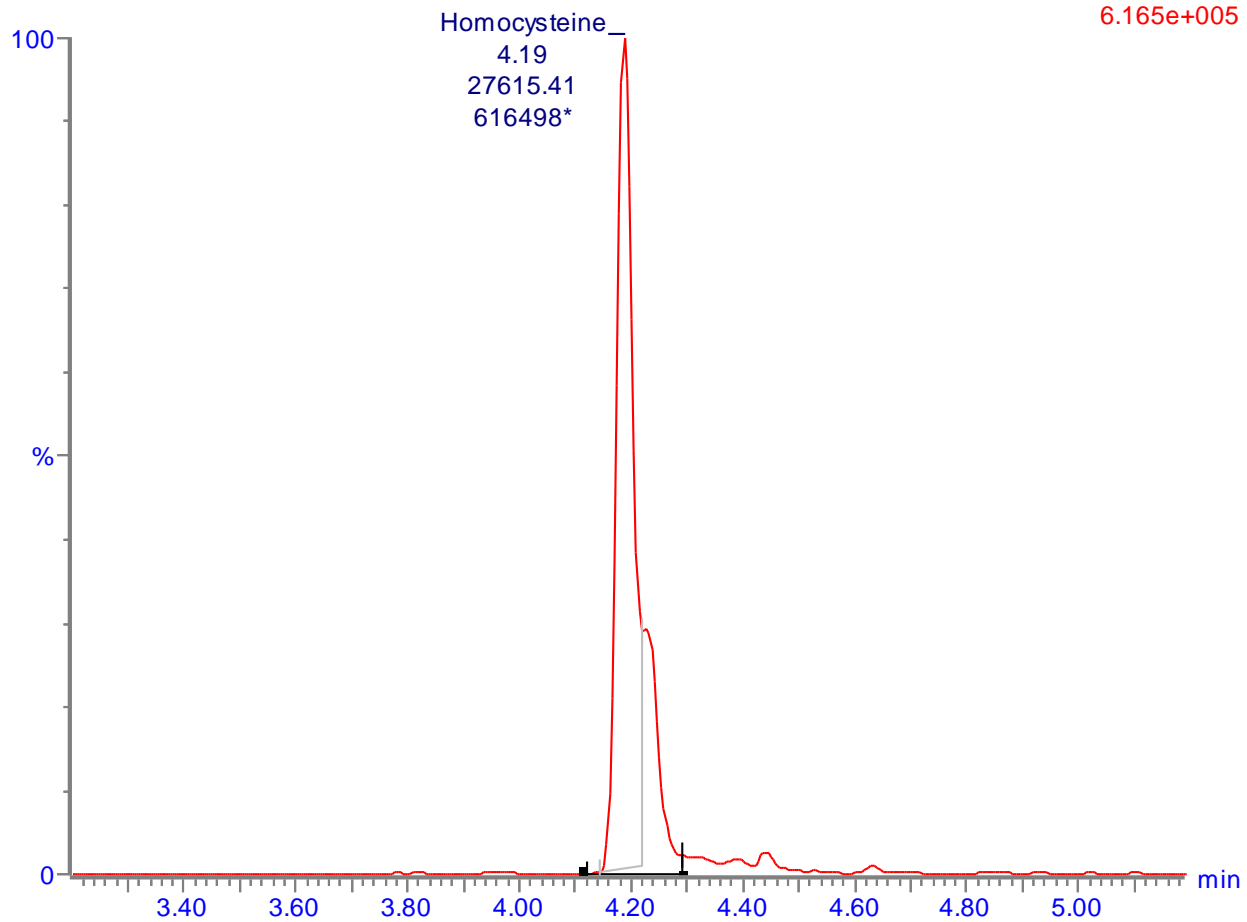

20201026\_acidomics\_method\_MS\_0025 Smooth(Mn,2x1)  
Cal curve 021\_100\_ng/mL

F25:MRM of 2 channels,ES+  
252.87 > 152.01  
1.406e+006

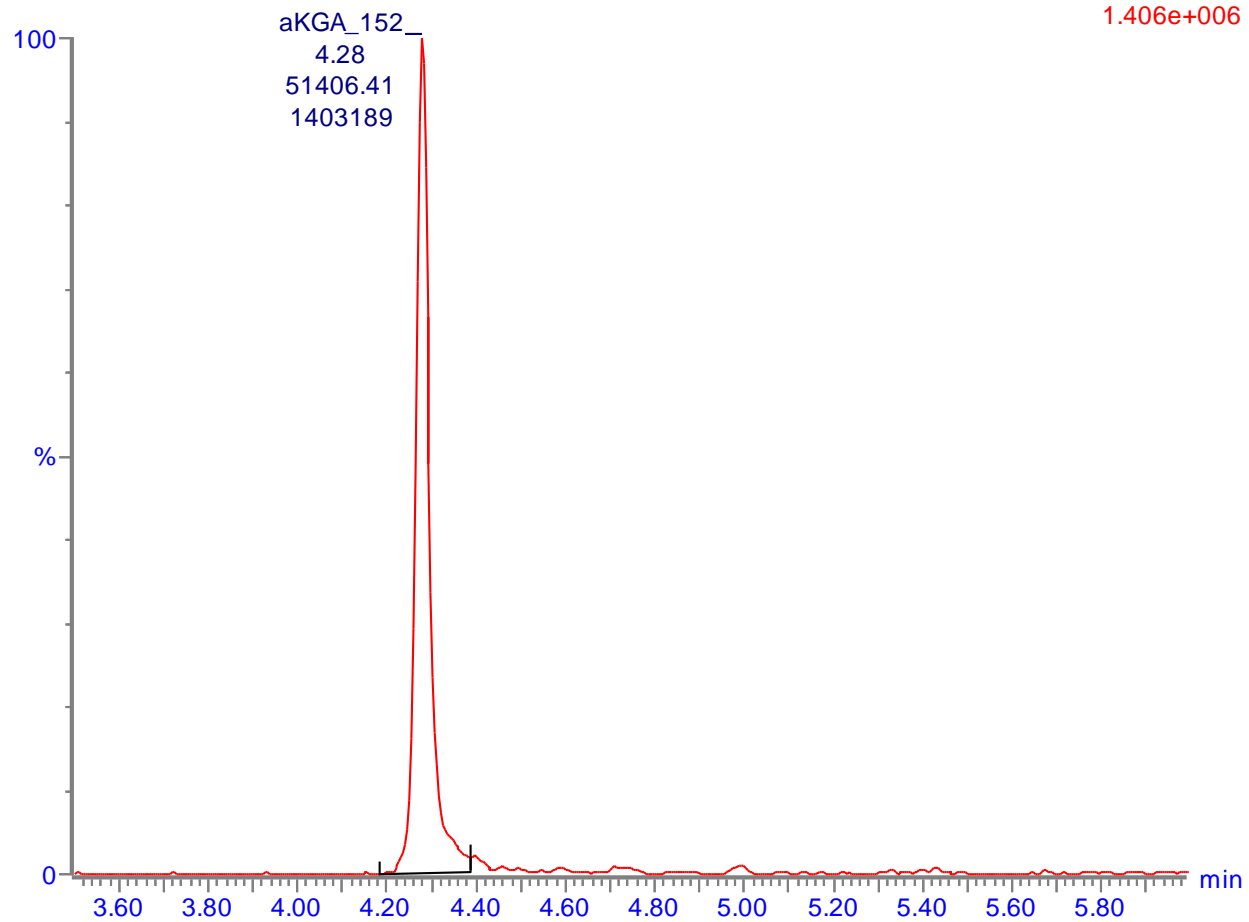

20201026\_acidomics\_method\_MS\_0024 Smooth(Mn,2x2)  
Cal curve 020\_75\_ng/mL

F26:MRM of 2 channels,ES+  
253.33 > 152.04  
1.356e+006

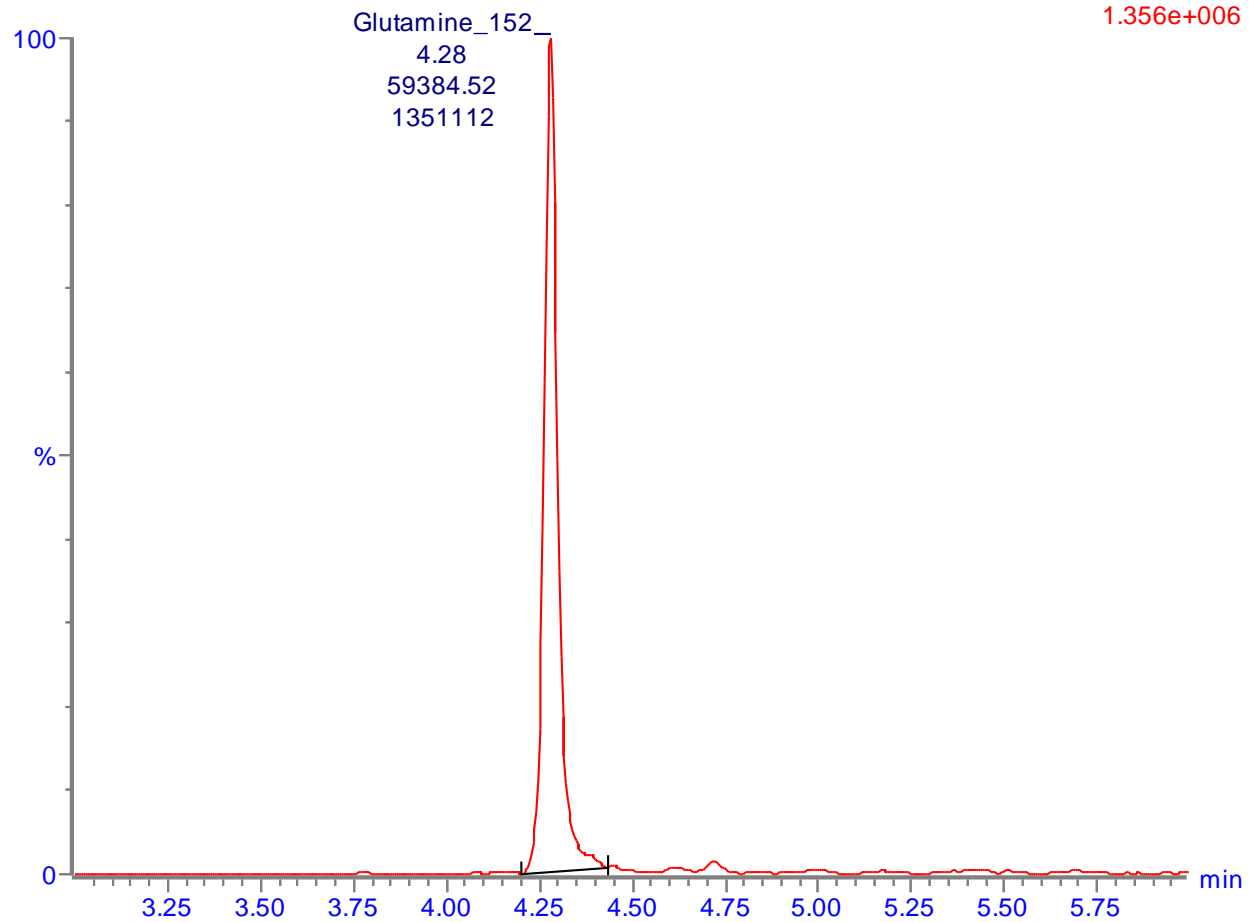

20201026\_acidomics\_method\_MS\_0025 Smooth(Mn,2x2)  
Cal curve 021\_100\_ng/mL

F27:MRM of 3 channels,ES+  
256.39 > 152.06  
8.957e+004

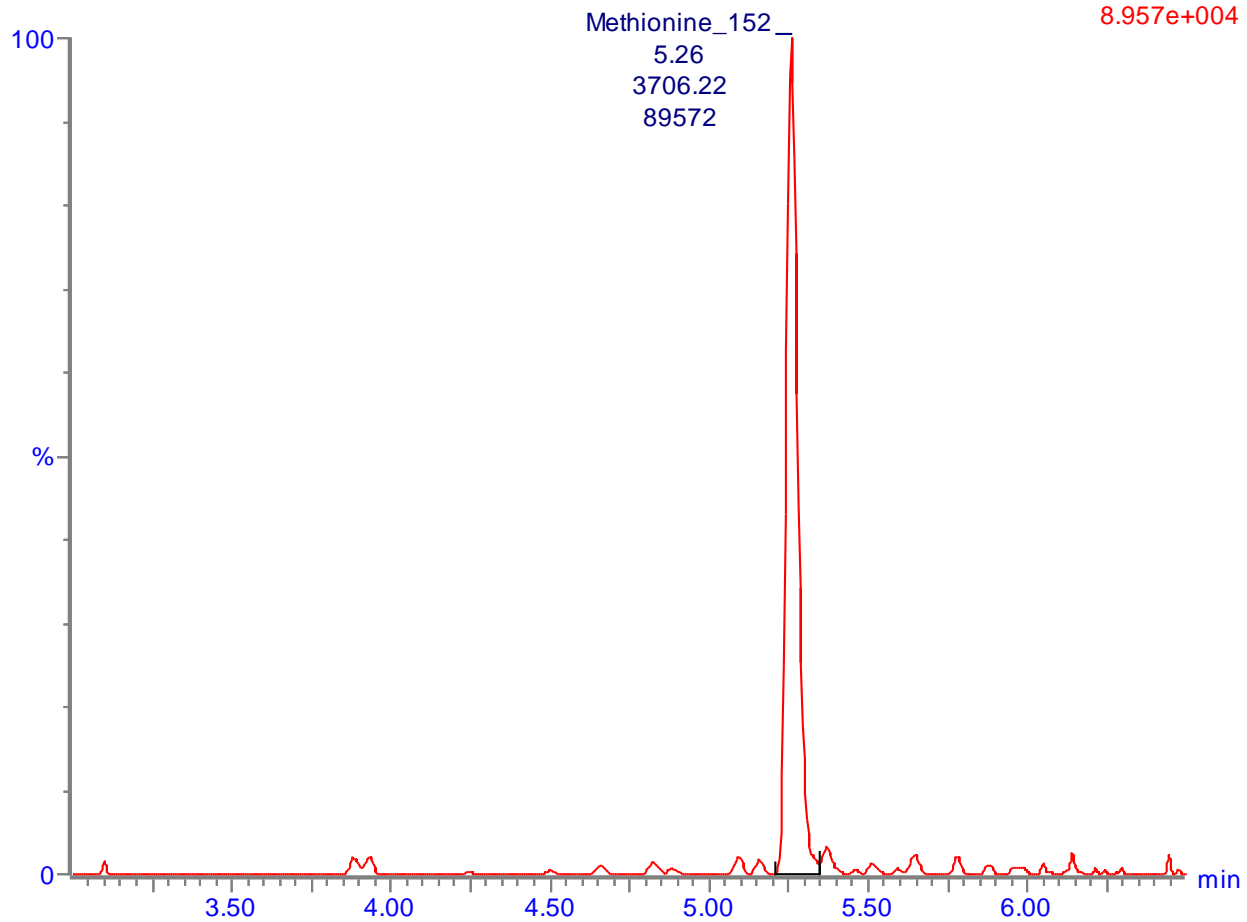



20201026\_acidomics\_method\_MS\_0025 Smooth(Mn,2x1)  
Cal curve 021\_100\_ng/mL

F29:MRM of 1 channel,ES+  
263.277 > 165.062  
1.584e+006

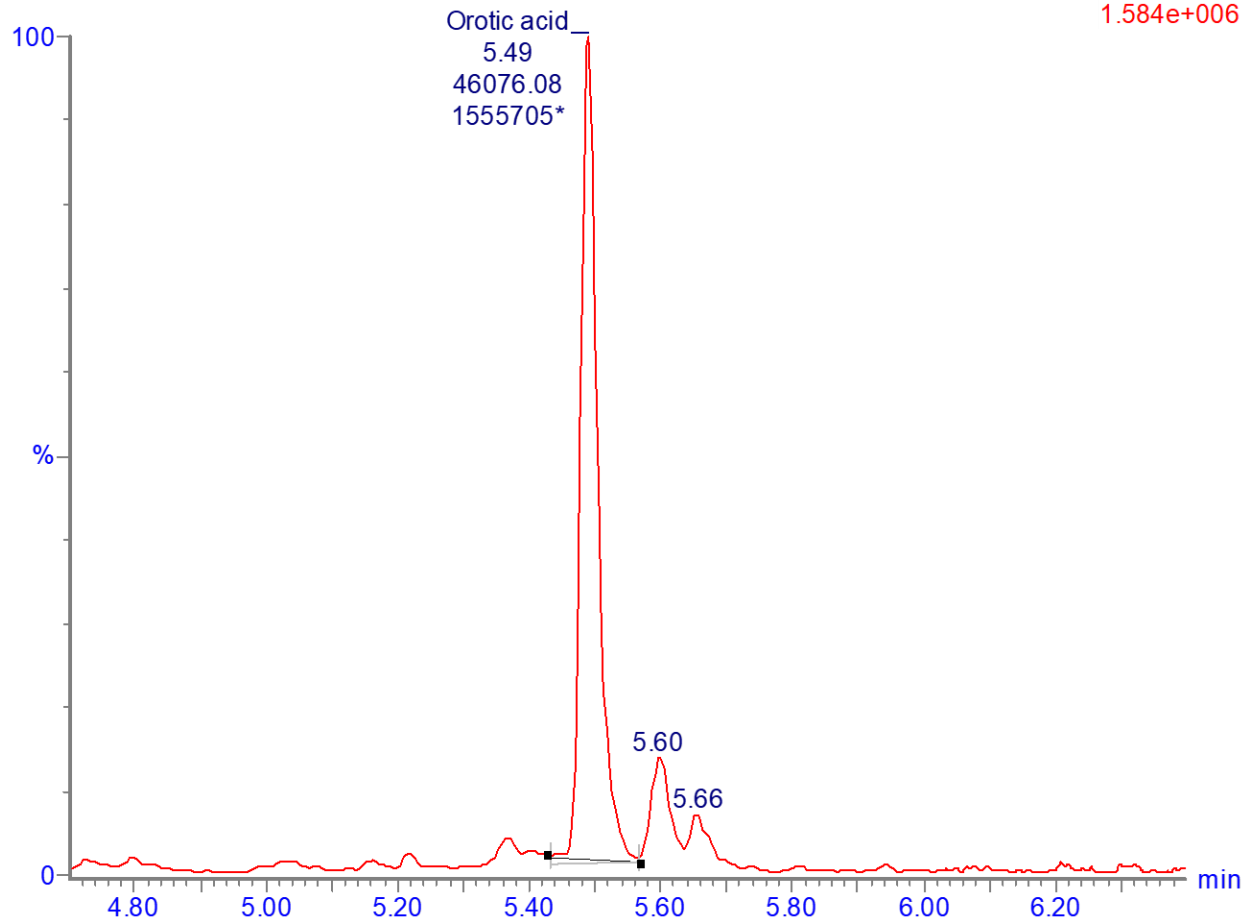

20201026\_acidomics\_method\_MS\_0029 Smooth(Mn,2x1)  
Cal curve 025\_1000\_ng/mL

F33:MRM of 1 channel,ES+  
296.346 > 165.061  
2.192e+006

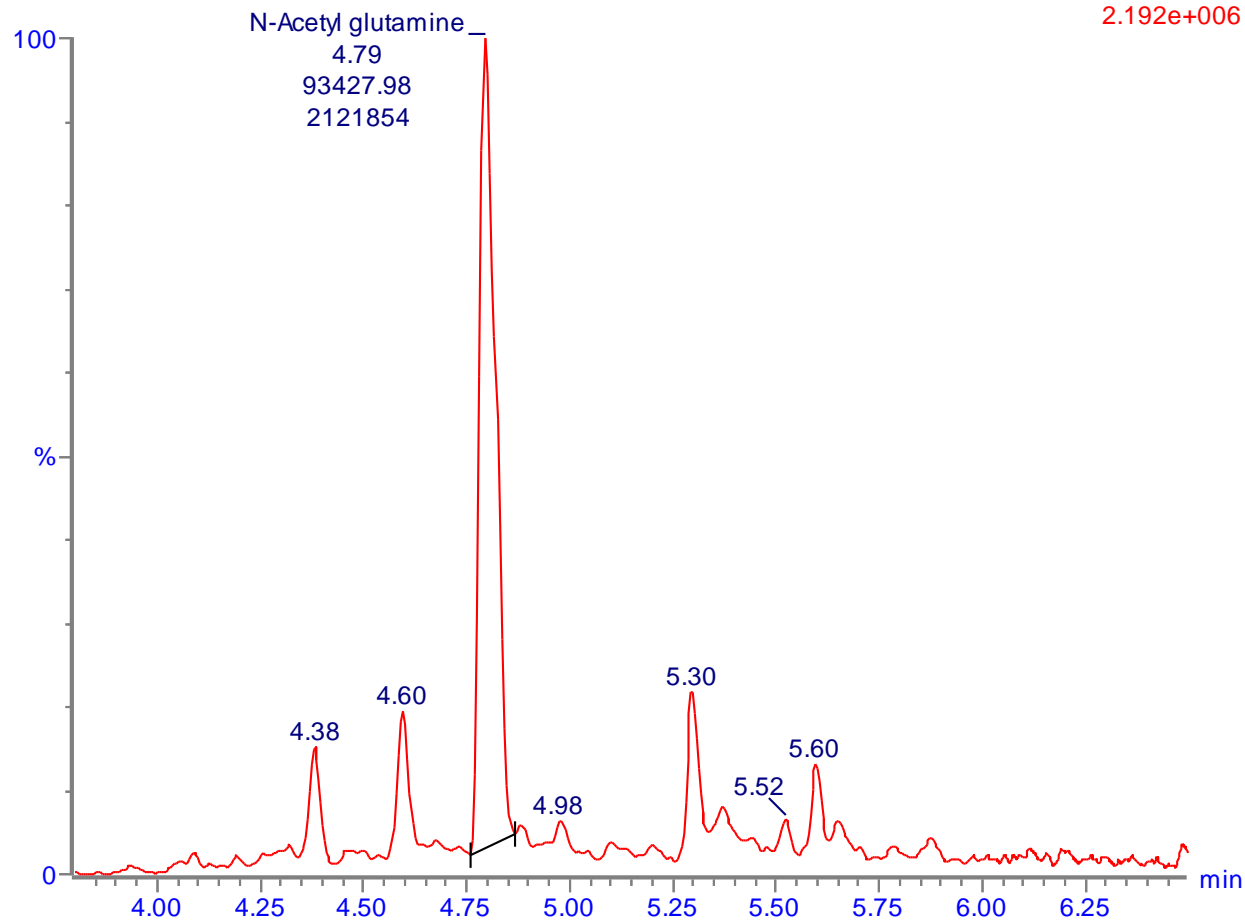

20201026\_acidomics\_method\_MS\_0025 Smooth(Mn,2x1)  
Cal curve 021\_100\_ng/mL

F34:MRM of 1 channel,ES+  
301.05 > 266.01  
2.333e+006

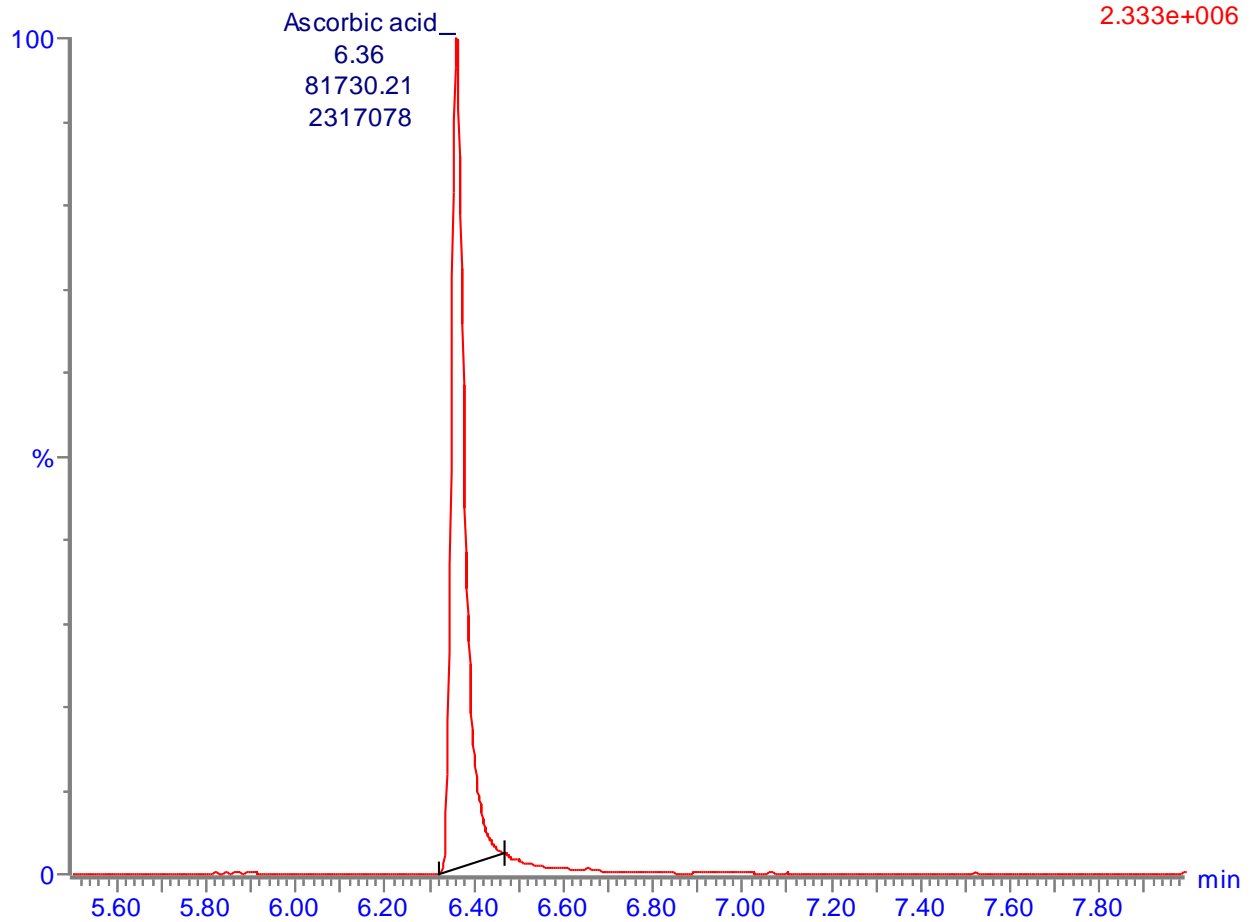

20201026\_acidomics\_method\_MS\_0025 Smooth(Mn,2x1)  
Cal curve 021\_100\_ng/mL

F35:MRM of 2 channels,ES+  
333.37 > 181.03  
9.346e+005

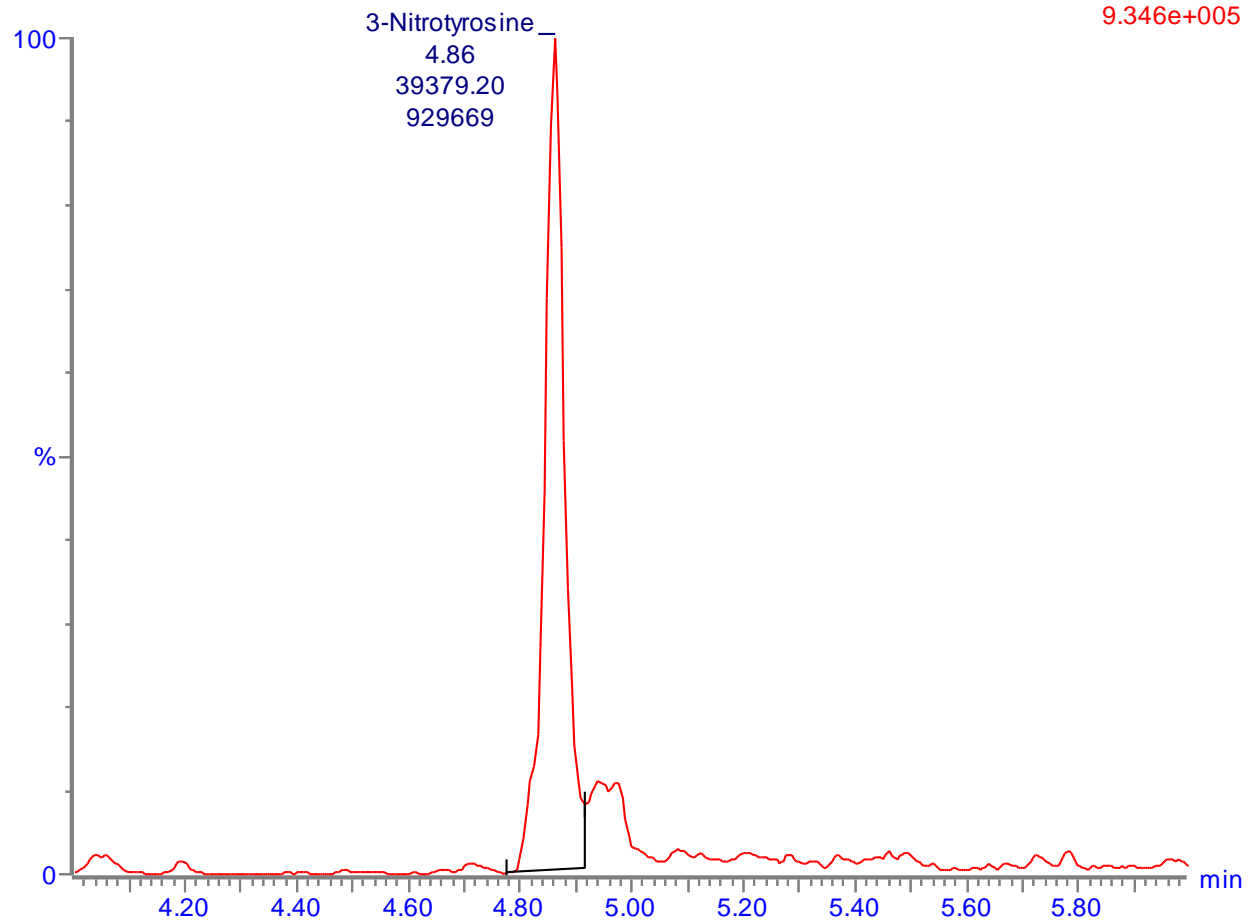

20201026\_acidomics\_method\_MS\_0027 Smooth(Mn,2x1)  
Cal curve 023\_500\_ng/mL

F36:MRM of 2 channels,ES+  
353.14 > 180.011  
7.316e+006

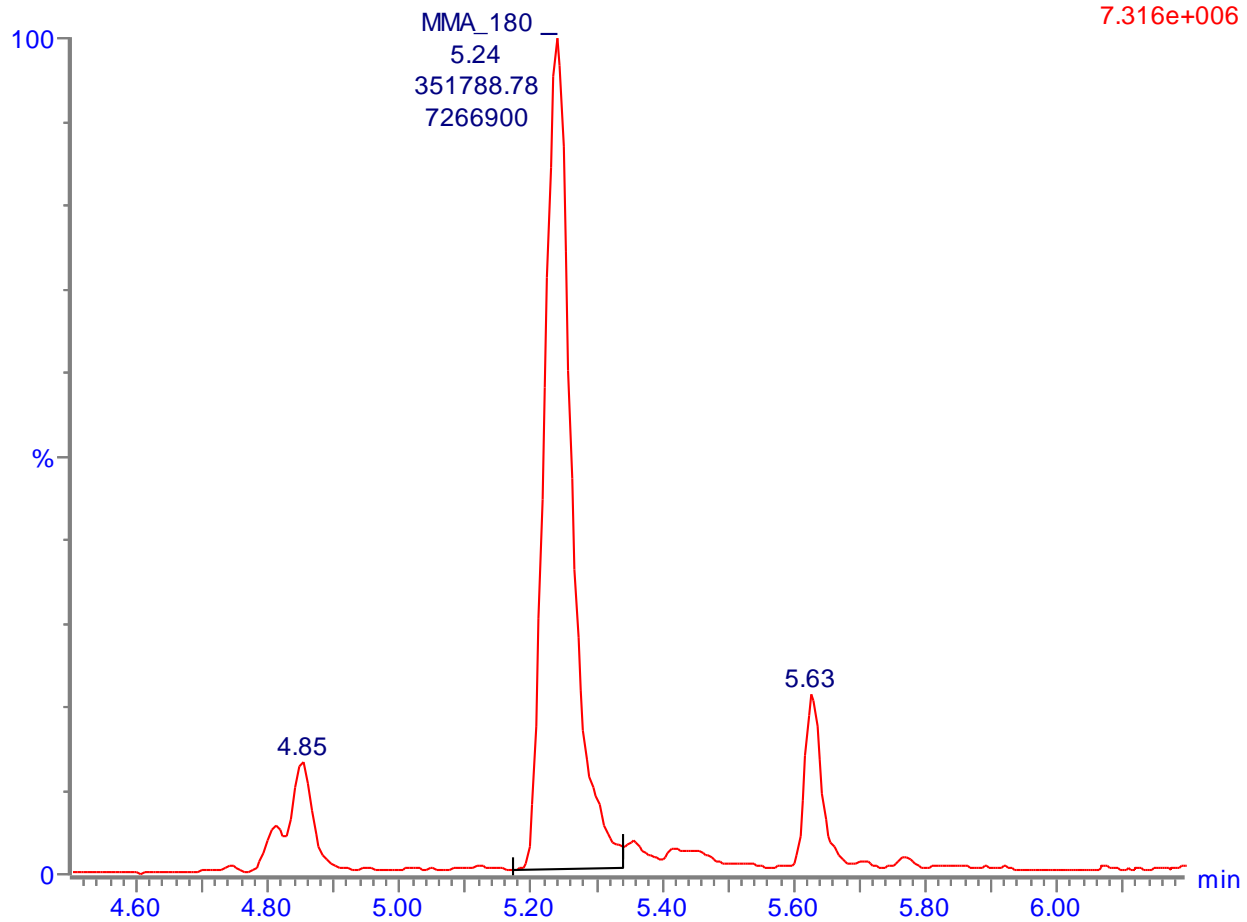

20201026\_acidomics\_method\_MS\_0025 Smooth(Mn,2x1)  
Cal curve 021\_100\_ng/mL

F39:MRM of 1 channel,ES+  
439.68 > 179.035  
6.535e+005

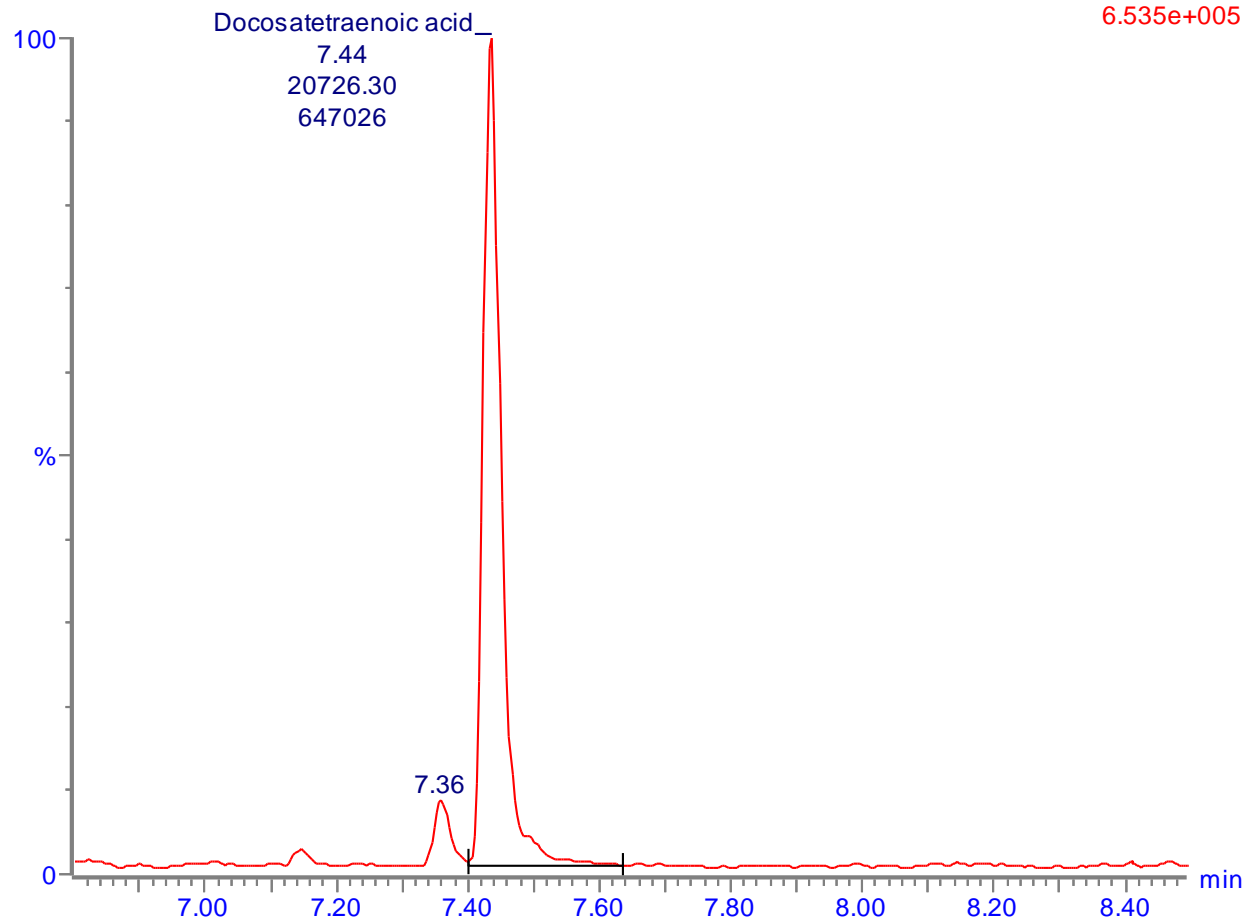

20201026\_acidomics\_method\_MS\_0025 Smooth(Mn,2x1)  
Cal curve 021\_100\_ng/mL

F37:MRM of 3 channels,ES+  
363.345 > 179.132  
3.171e+006

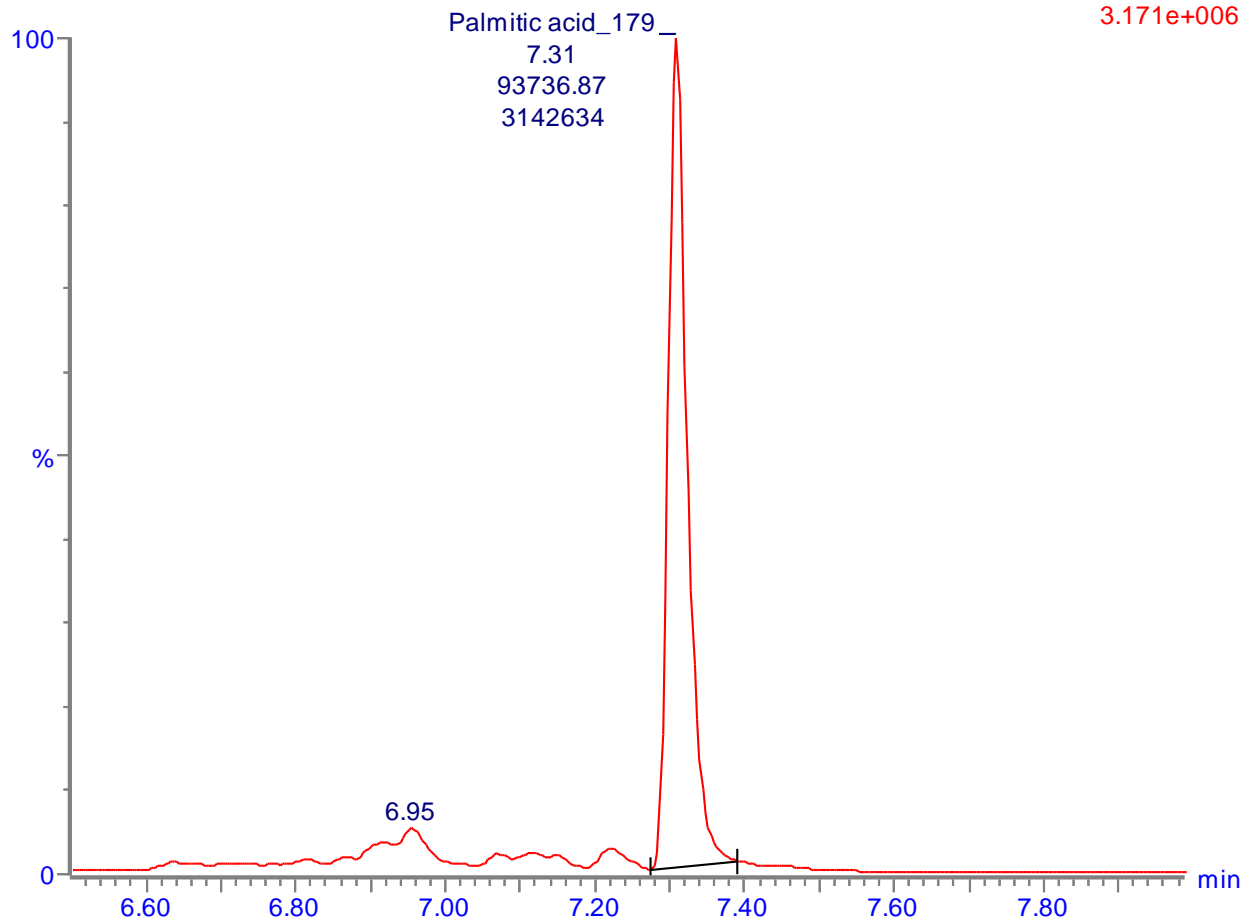

20201009\_acidomics\_method\_0025 Smooth(Mn,2x1)  
Cal curve 021\_100\_ng/mL

F3:MRM of 1 channel,ES+  
182.251 > 166.06  
1.033e+006

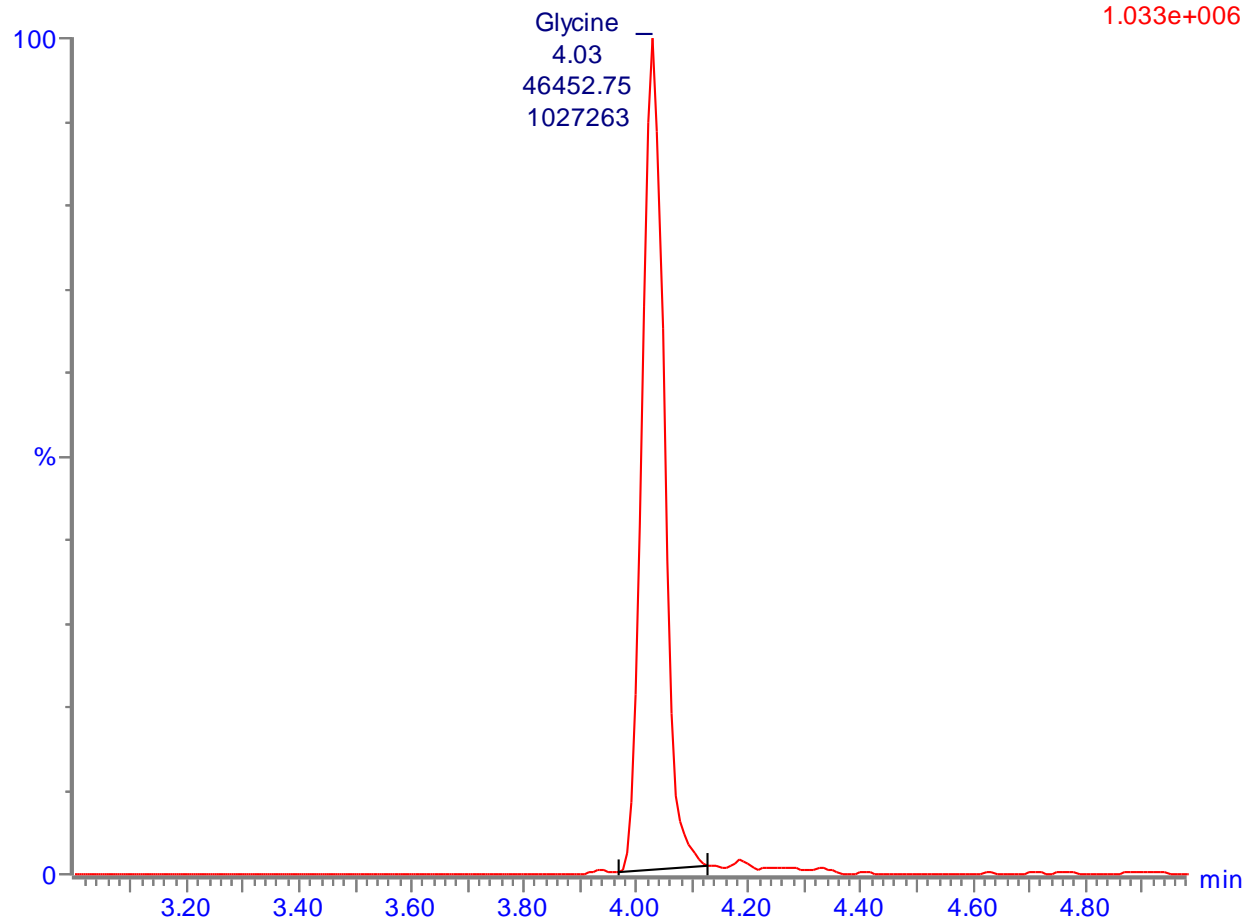



20201009\_acidomics\_method\_0025 Smooth(Mn,2x2)  
Cal curve 021\_100\_ng/mL

F5:MRM of 1 channel,ES+  
196.273 > 166.06  
9.364e+005

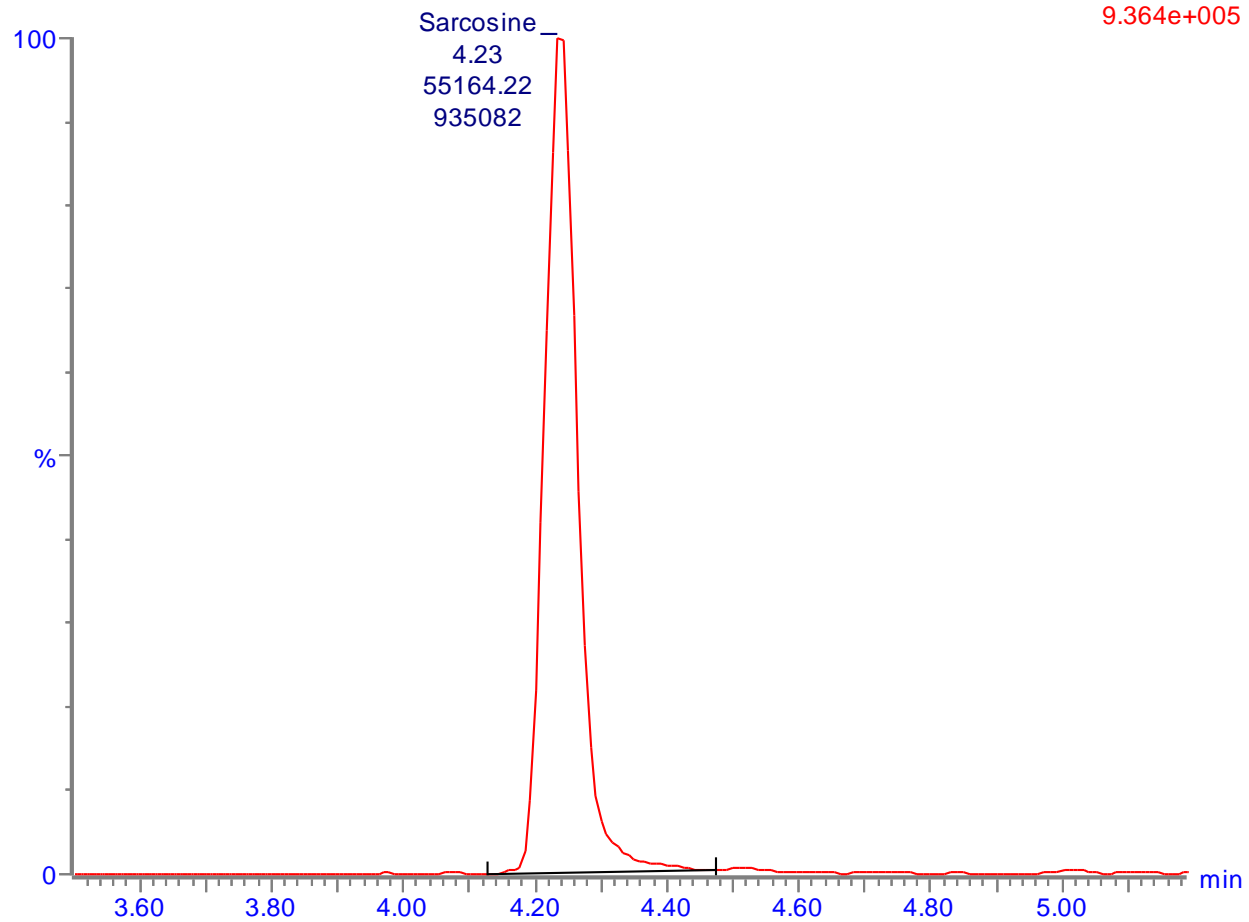

20201009\_acidomics\_method\_0025 Smooth(Mn,2x1)  
Cal curve 021\_100\_ng/mL

F8:MRM of 1 channel,ES+  
196.817 > 143.802  
1.706e+006

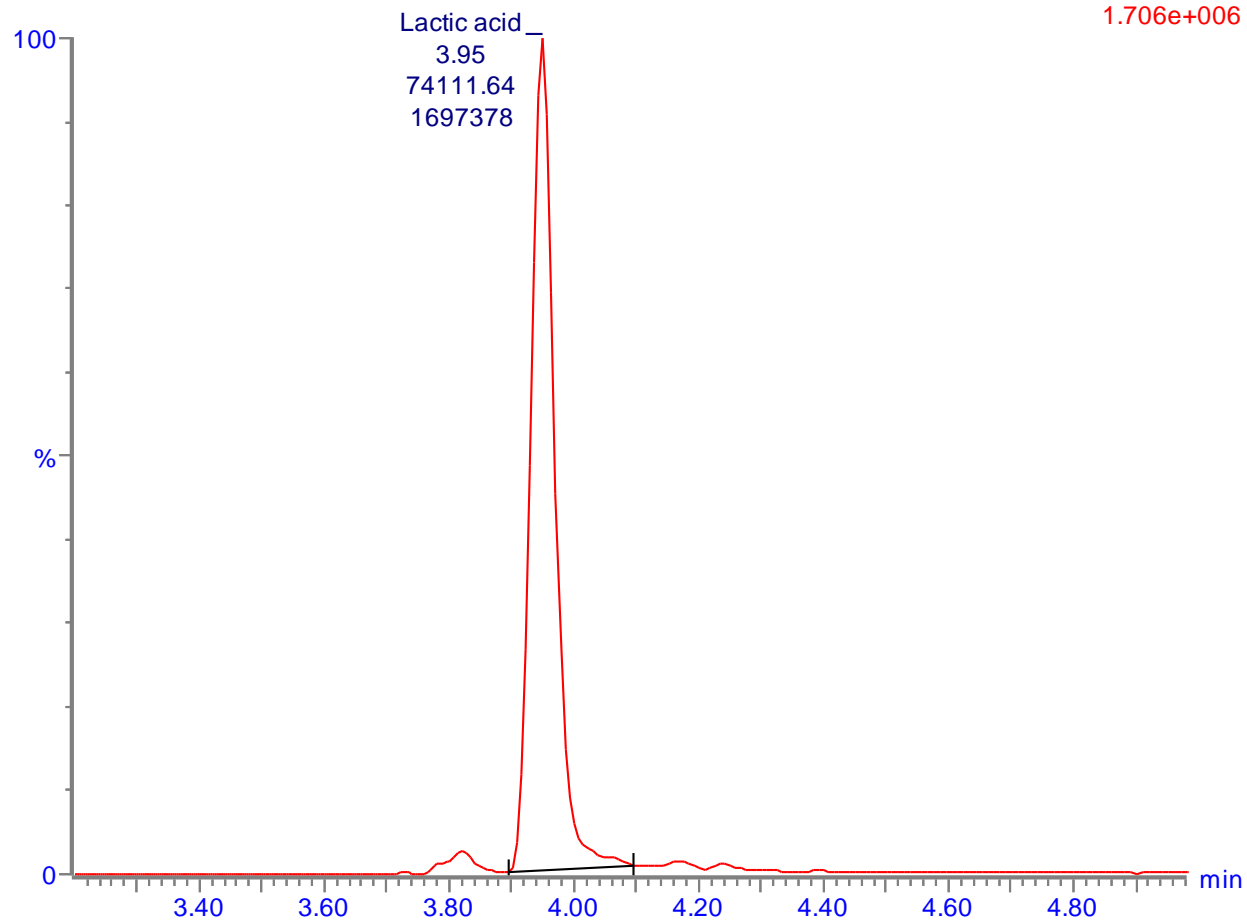

20201009\_acidomics\_method\_0027 Smooth(Mn,2x1)  
Cal curve 023\_500\_ng/mL

F9:MRM of 1 channel,ES+  
196.972 > 151.042  
1.268e+007

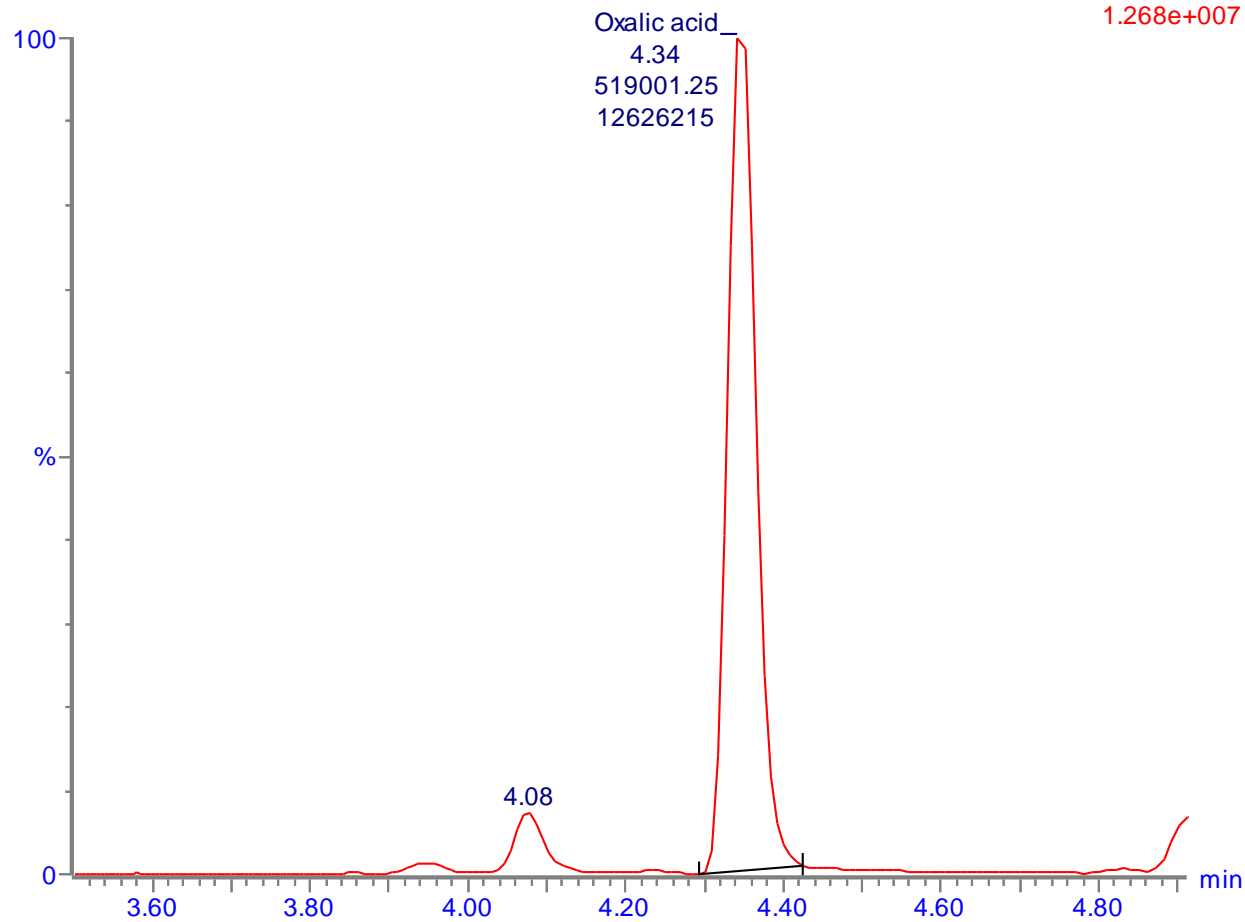

20201009\_acidomics\_method\_0025 Smooth(Mn,2x1)  
Cal curve 021\_100\_ng/mL

F12:MRM of 1 channel,ES+  
210.3 > 166.05  
4.039e+006

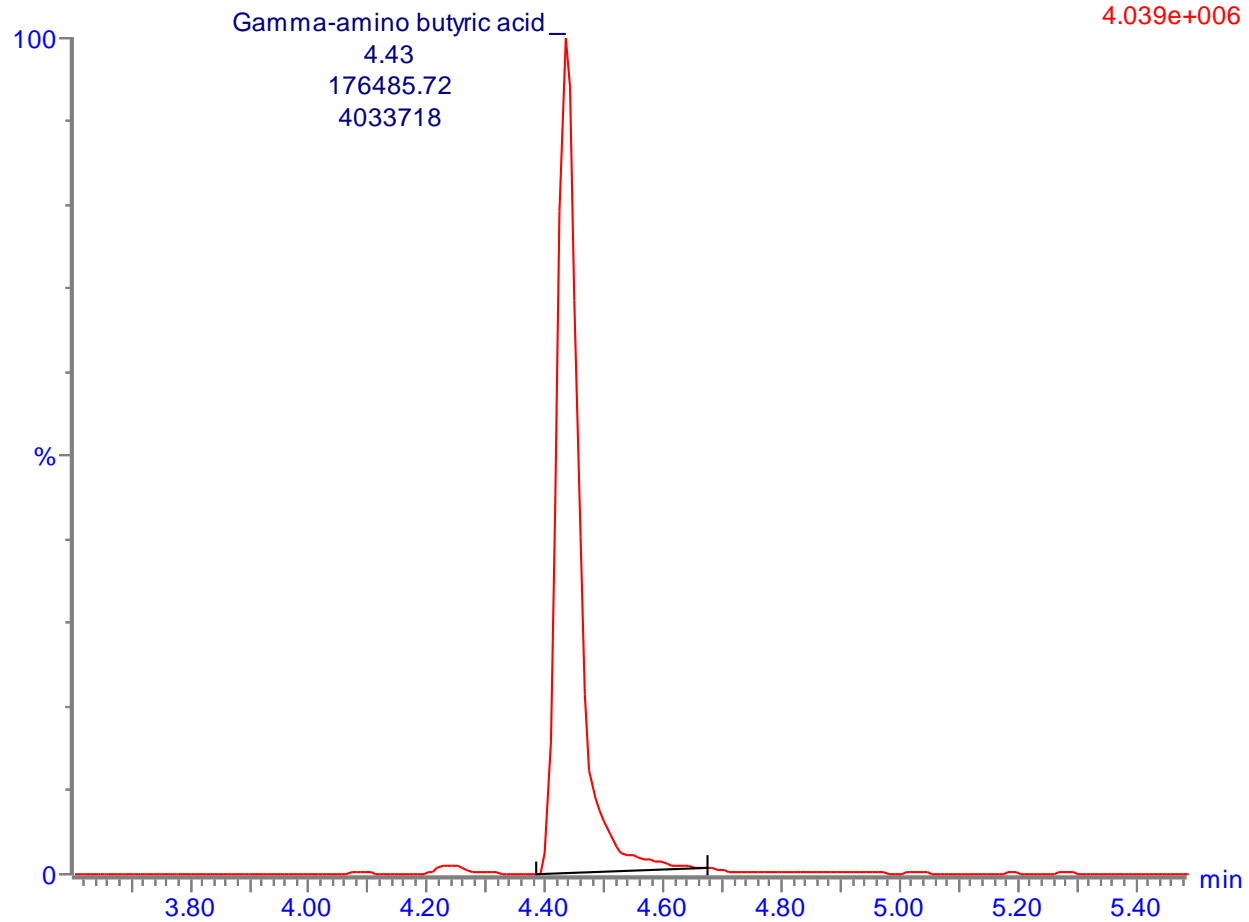

20201009\_acidomics\_method\_0025 Smooth(Mn,2x1)  
Cal curve 021\_100\_ng/mL

F13:MRM of 1 channel,ES+  
211.152 > 179.077  
3.817e+006

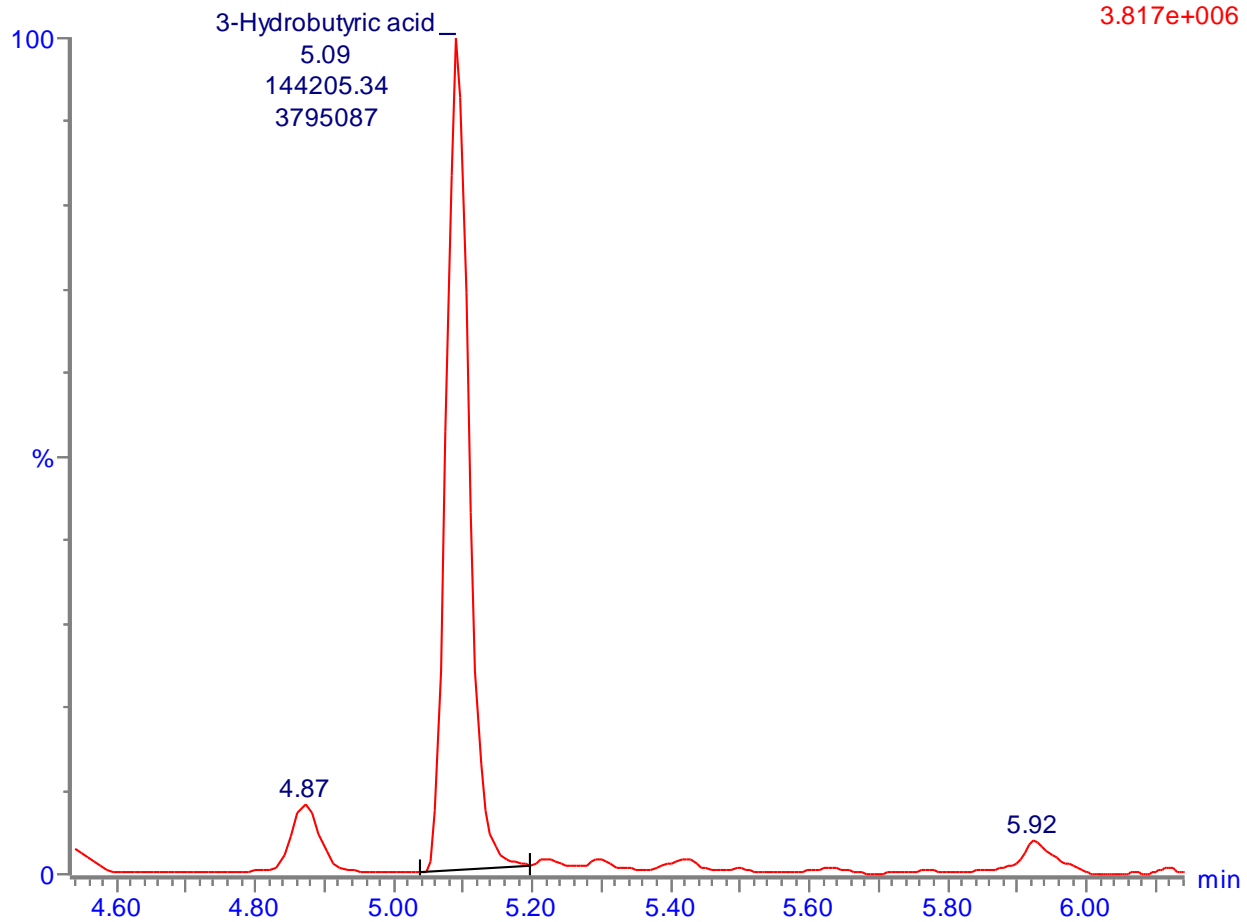

20201009\_acidomics\_method\_0025 Smooth(Mn,2x1)  
Cal curve 021\_100\_ng/mL

F22:MRM of 1 channel,ES+  
226.3 > 166.014  
3.058e+005

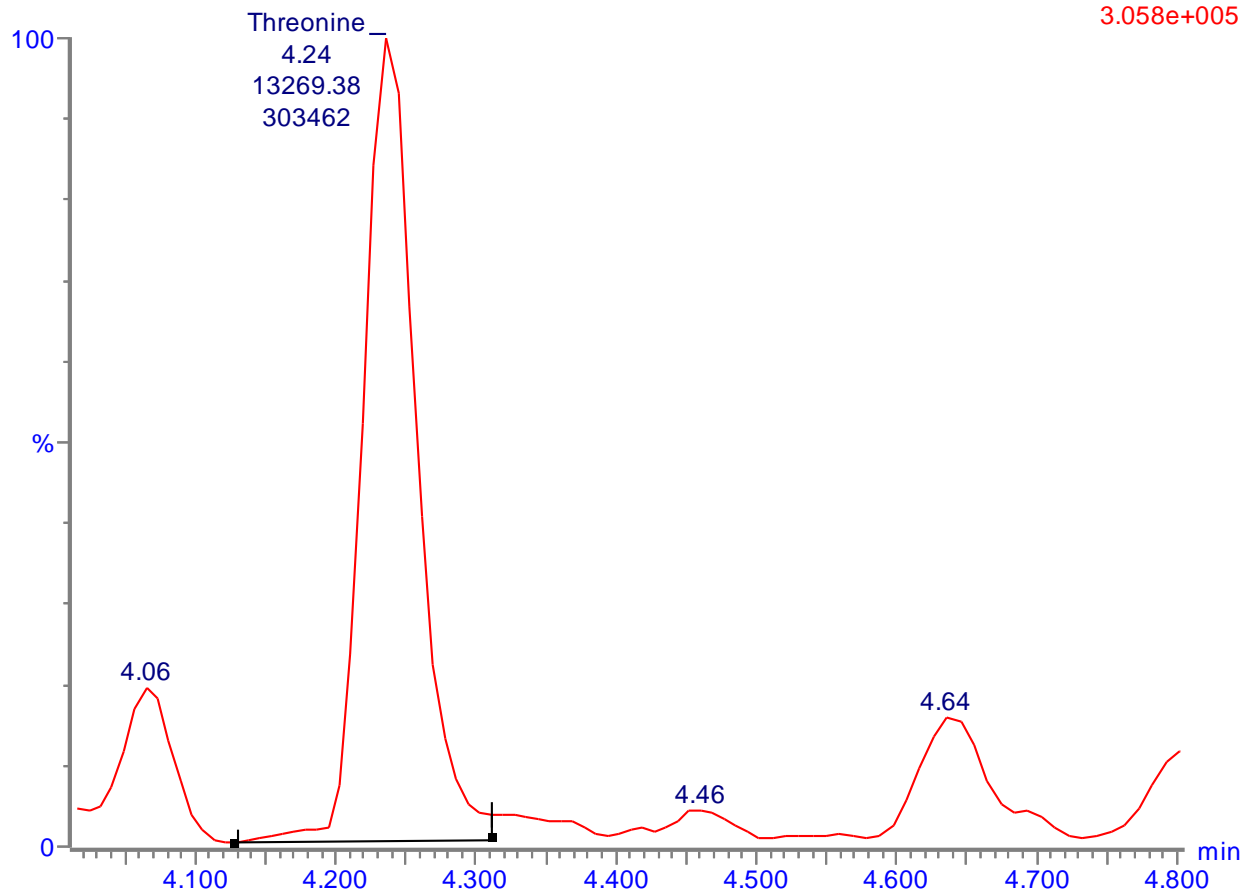

20201009\_acidomics\_method\_0028 Smooth(Mn,2x1)  
Cal curve 024\_750\_ng/mL

F23:MRM of 1 channel,ES+  
228.34 > 166.036  
2.135e+006

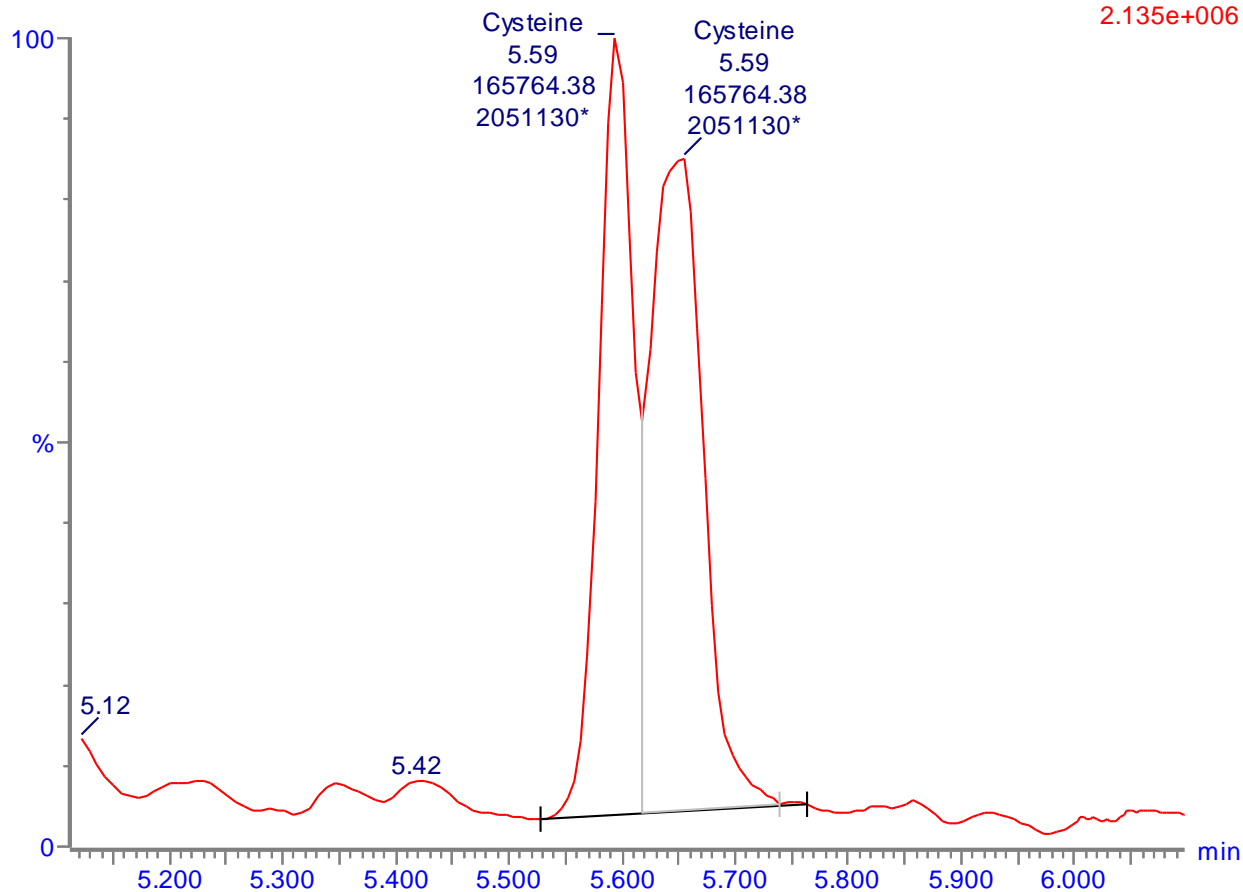

20201009\_acidomics\_method\_0029 Smooth(Mn,2x1)  
Cal curve 025\_1000\_ng/mL

F27:MRM of 1 channel,ES+  
236.295 > 165.996  
3.054e+006

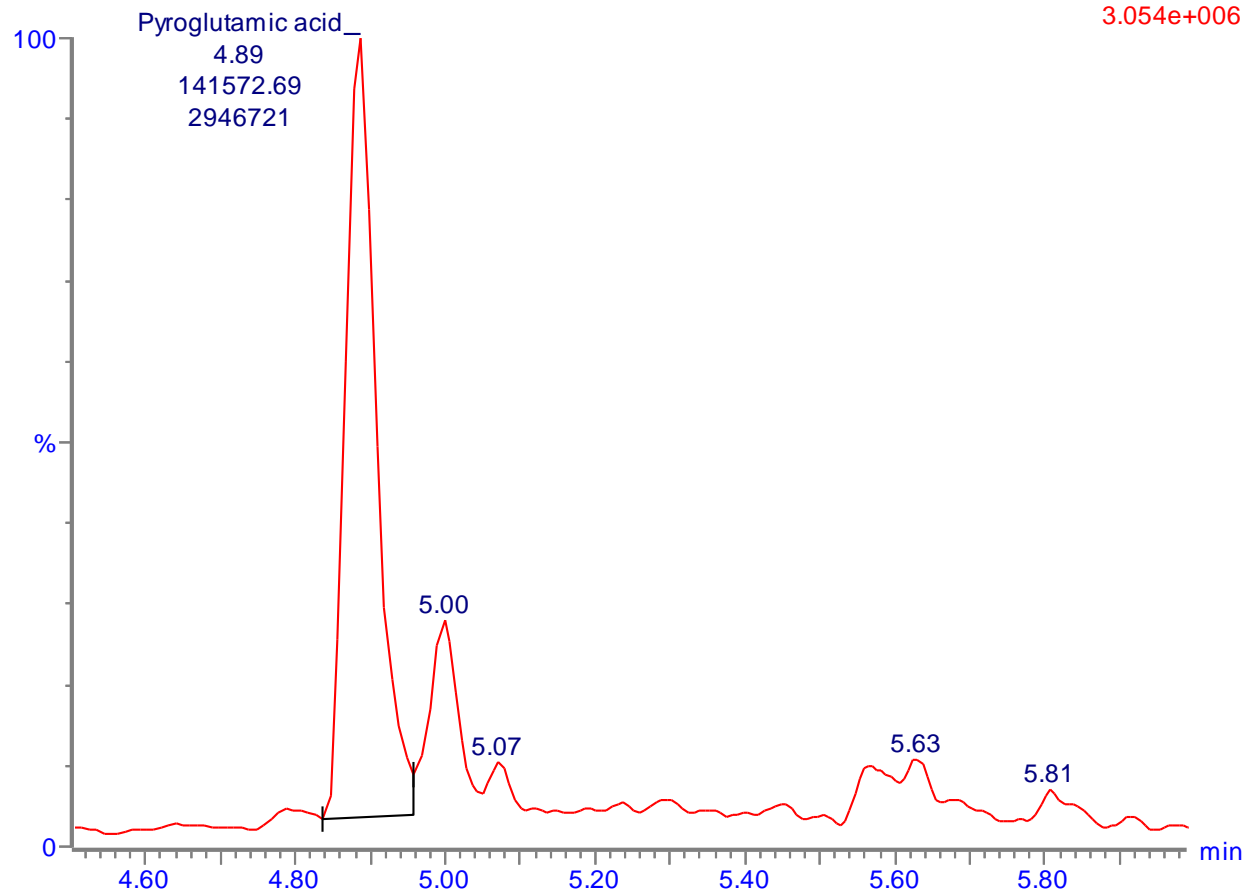



20201009\_acidomics\_method\_0025 Smooth(Mn,2x1)  
Cal curve 021\_100\_ng/mL

F28:MRM of 2 channels,ES+  
281.288 > 166.06  
4.022e+007

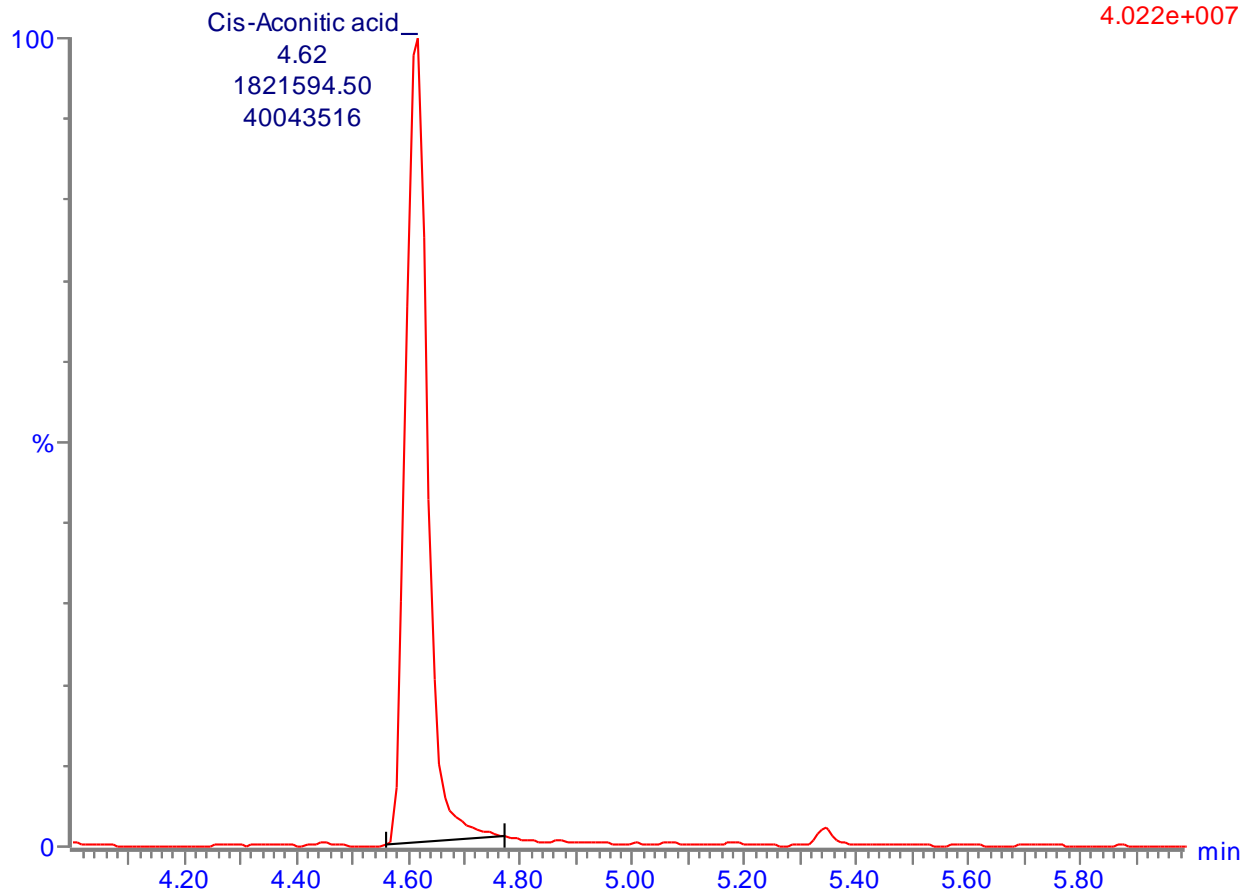

20201009\_acidomics\_method\_0025 Smooth(Mn,2x1)  
Cal curve 021\_100\_ng/mL

F28:MRM of 2 channels,ES+  
237.259 > 166.115  
5.017e+006

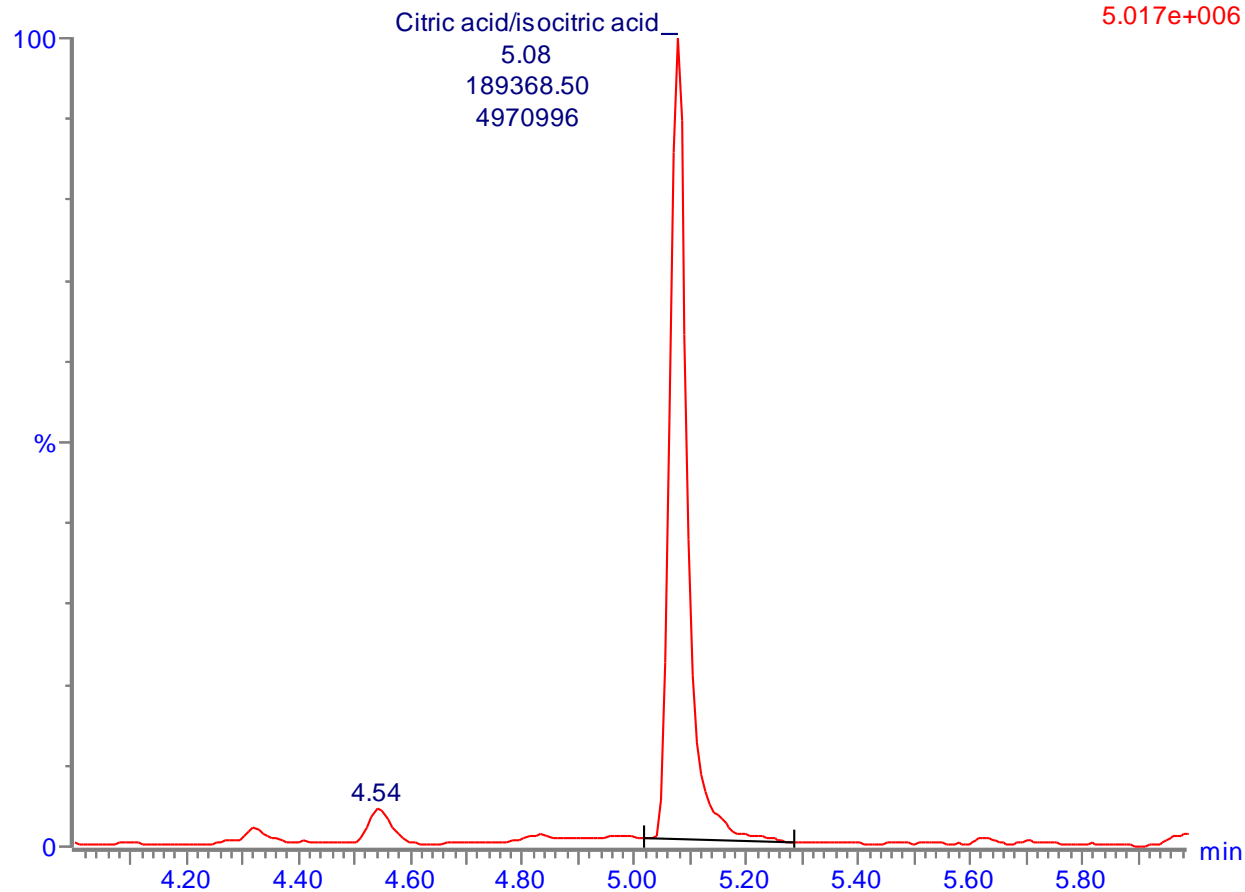

20210504\_acidomics\_cells\_experiment\_0009 Smooth(Mn,2x3)  
Cal curve 008\_500\_ng/mL

F4:MRM of 2 channels,ES+  
237.279 > 166.06  
1.802e+006

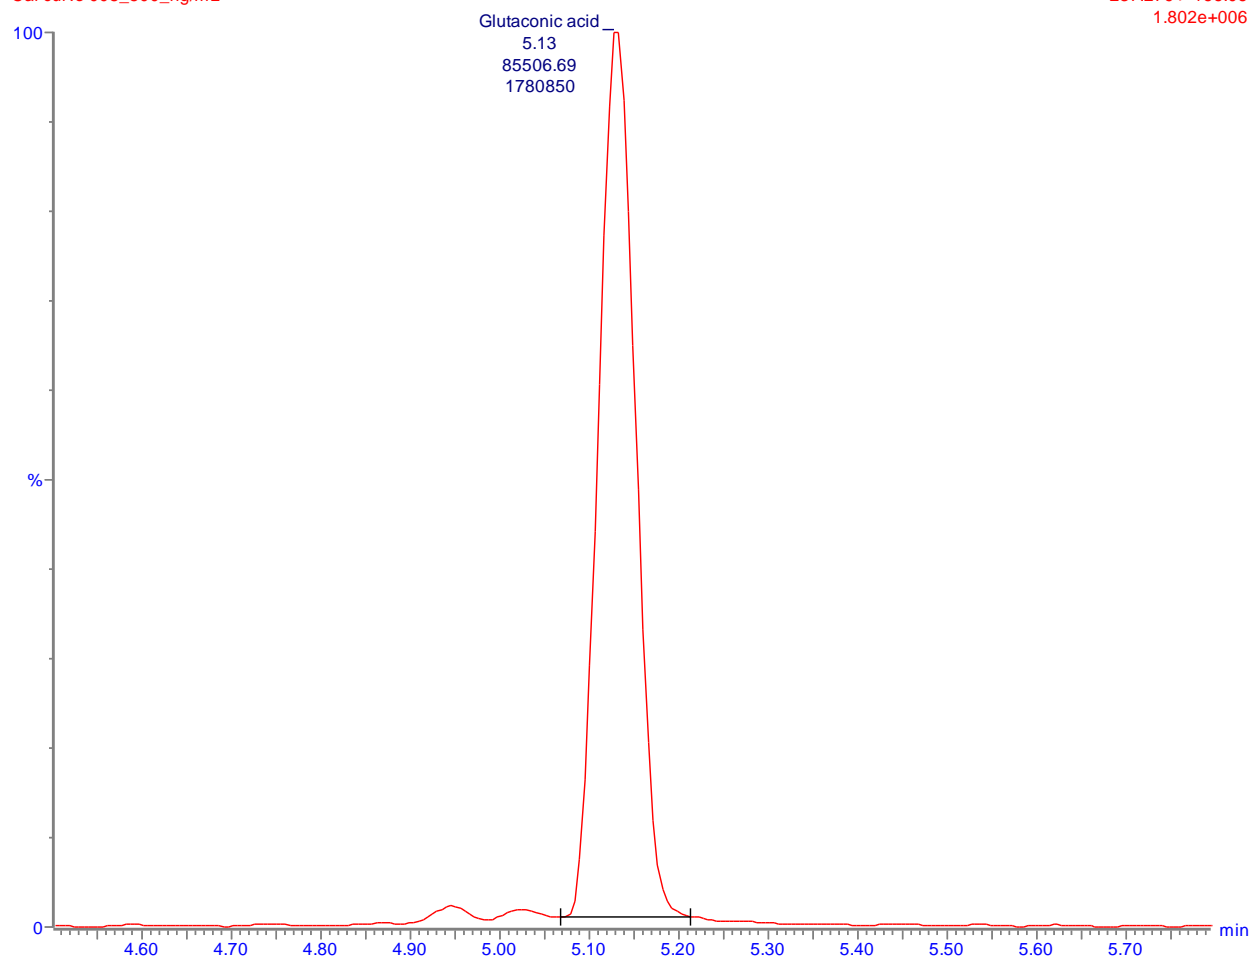

20201009\_acidomics\_method\_0025 Smooth(Mn,2x1)  
Cal curve 021\_100\_ng/mL

F30:MRM of 2 channels,ES+  
238.966 > 179.133  
3.055e+006

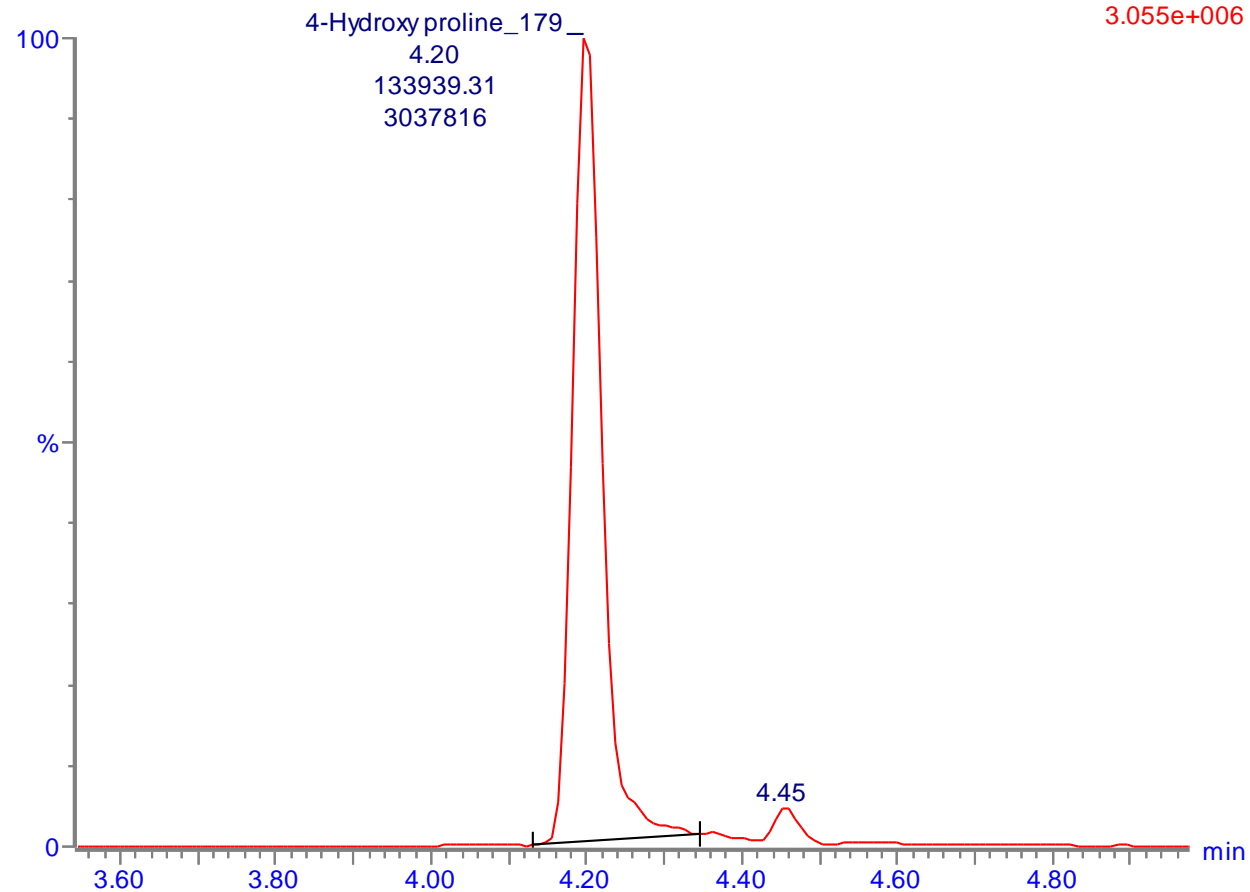

20201009\_acidomics\_method\_0021 Smooth(Mn,2x1)  
Cal curve 017\_10\_ng/mL

F33:MRM of 1 channel,ES+  
239.299 > 166.06  
2.068e+005

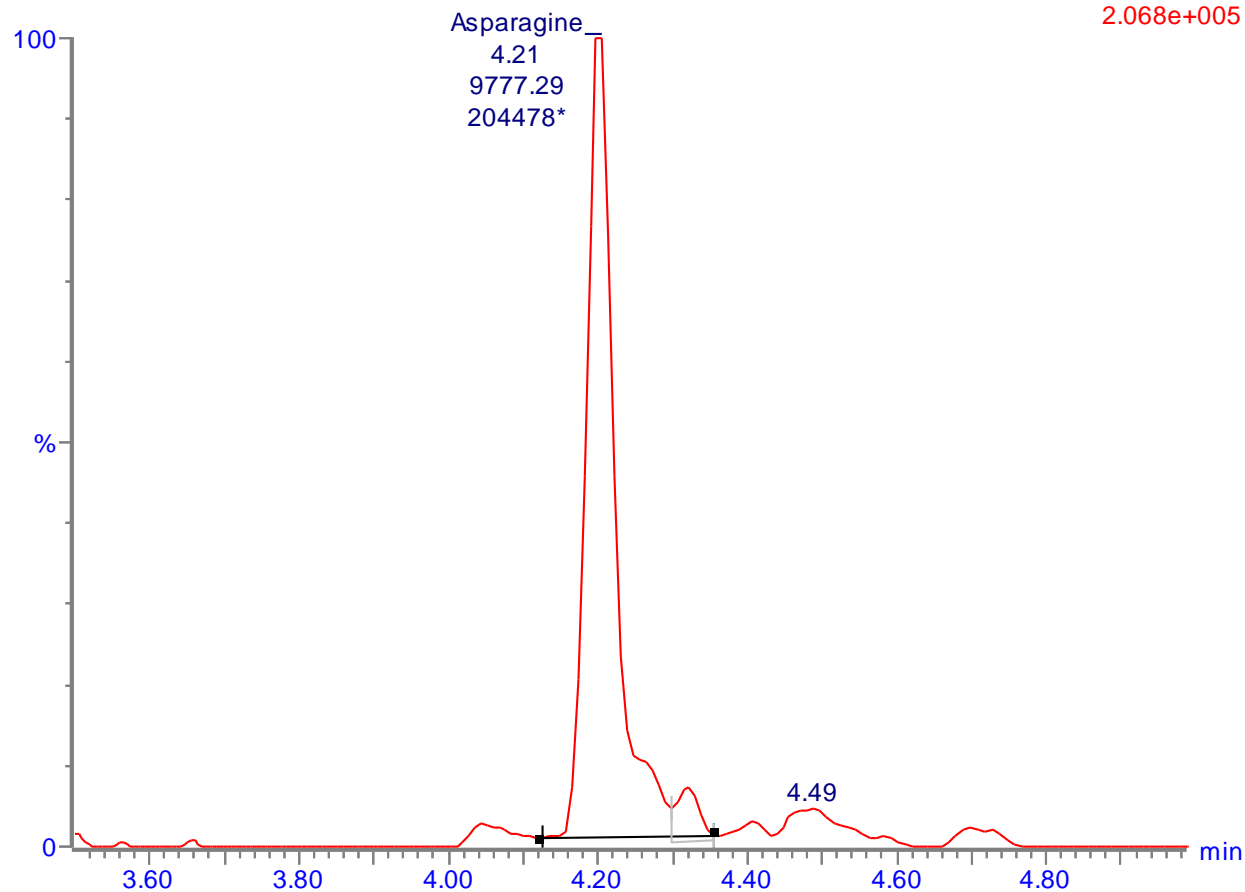

20210504\_acidomics\_cells\_experiment\_0009 Smooth(Mn,2x3)  
Cal curve 008\_500\_ng/mL

F6:MRM of 1 channel,ES+  
239.299 > 209.06  
1.012e+004

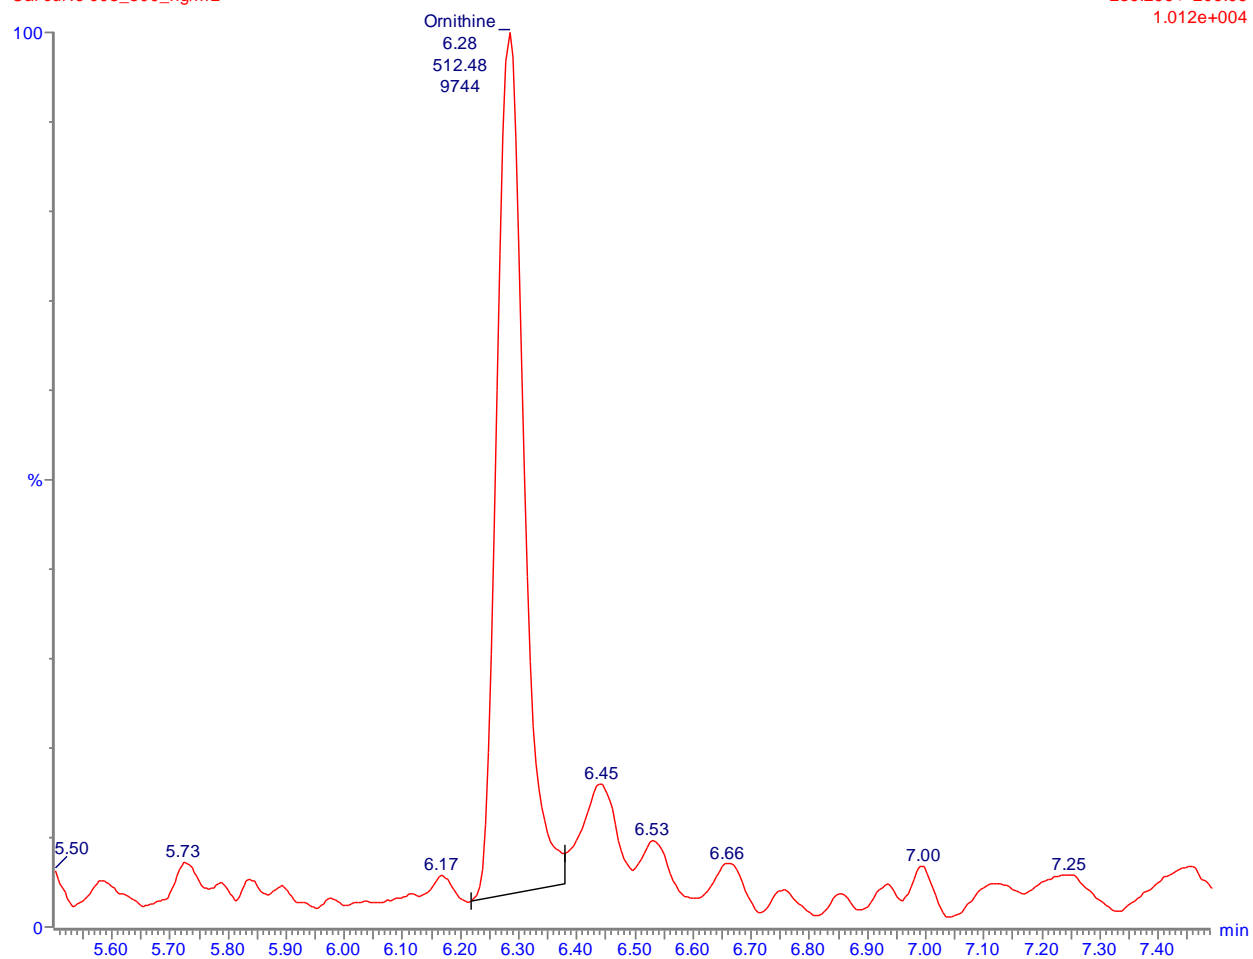

20201009\_acidomics\_method\_0025 Smooth(Mn,2x1)  
Cal curve 021\_100\_ng/mL

F36:MRM of 1 channel,ES+  
239.3 > 166.06  
1.644e+006

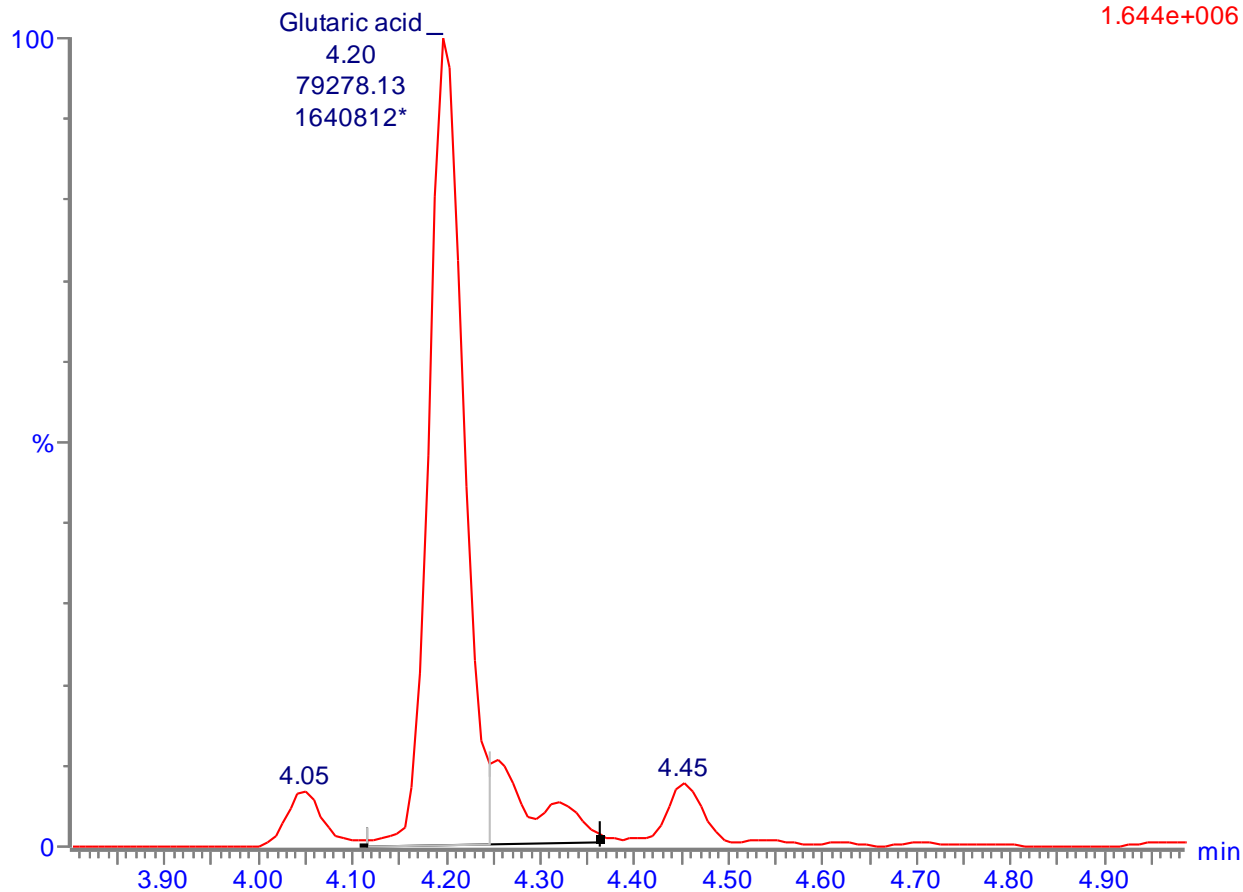

20201009\_acidomics\_method\_0025 Smooth(Mn,2x1)  
Cal curve 021\_100\_ng/mL

F41:MRM of 1 channel,ES+  
253.16 > 166.06  
6.332e+006

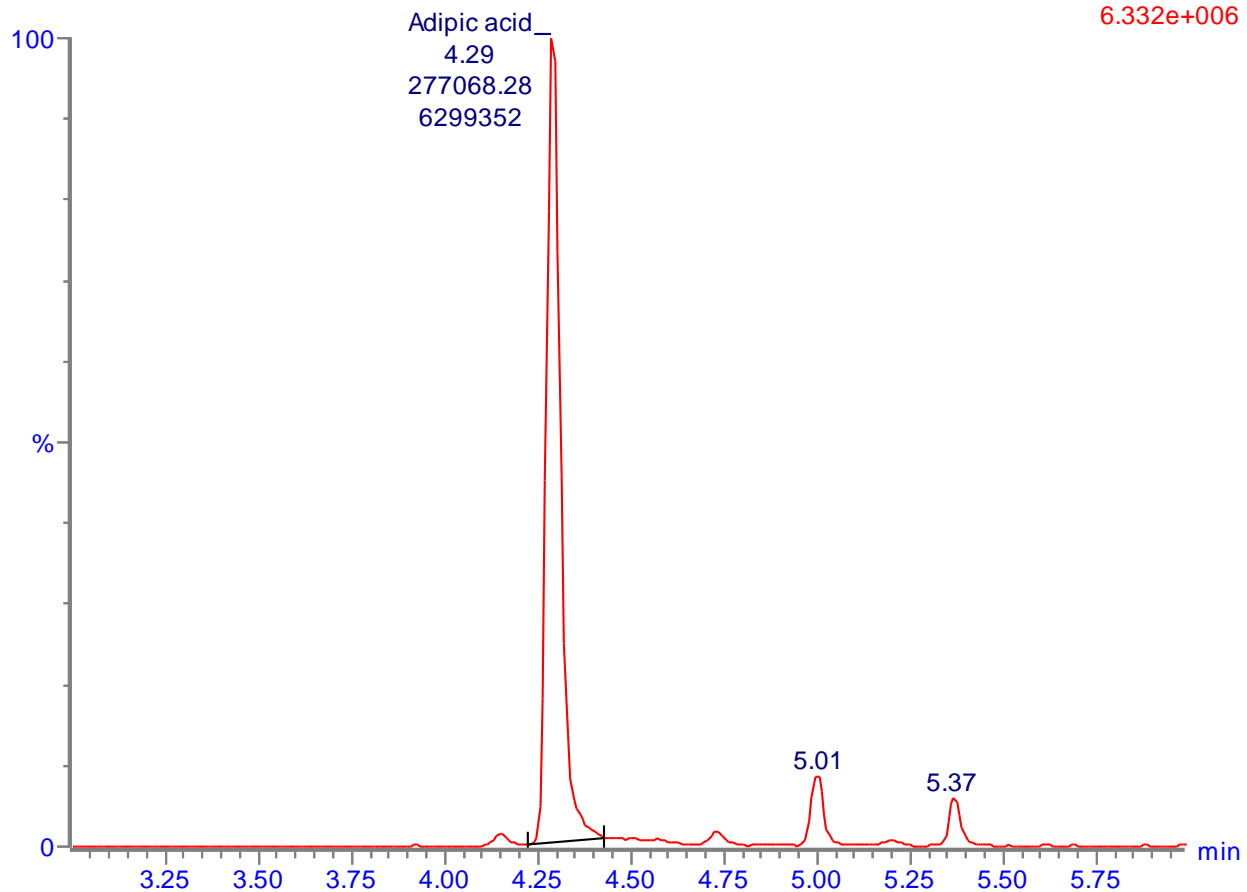



20201009\_acidomics\_method\_0021 Smooth(Mn,2x1)  
Cal curve 017\_10\_ng/mL

F75:MRM of 1 channel,ES+  
366.23 > 304.053  
1.122e+007

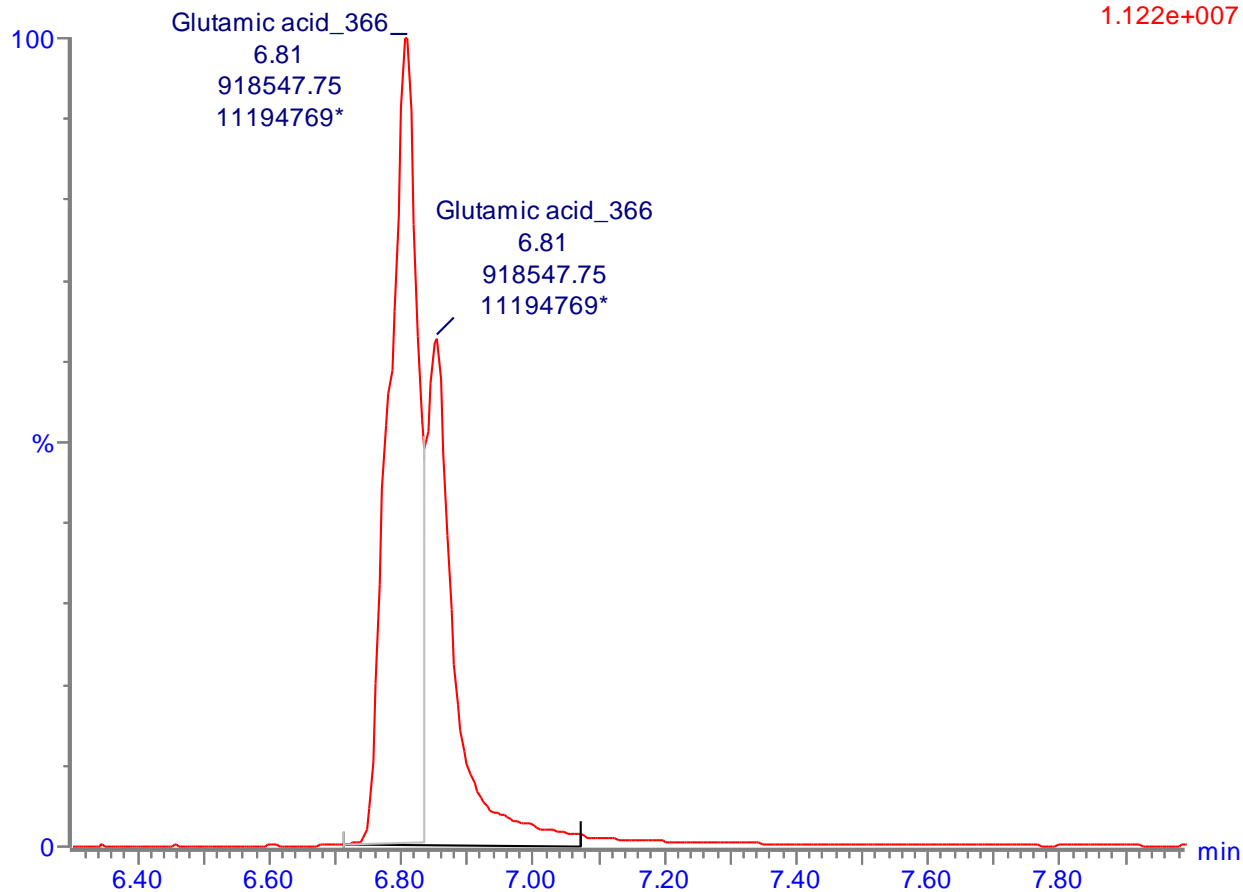

20201009\_acidomics\_method\_0025 Smooth(Mn,2x1)  
Cal curve 021\_100\_ng/mL

F44:MRM of 2 channels,ES+  
255.11 > 219.09  
5.378e+006

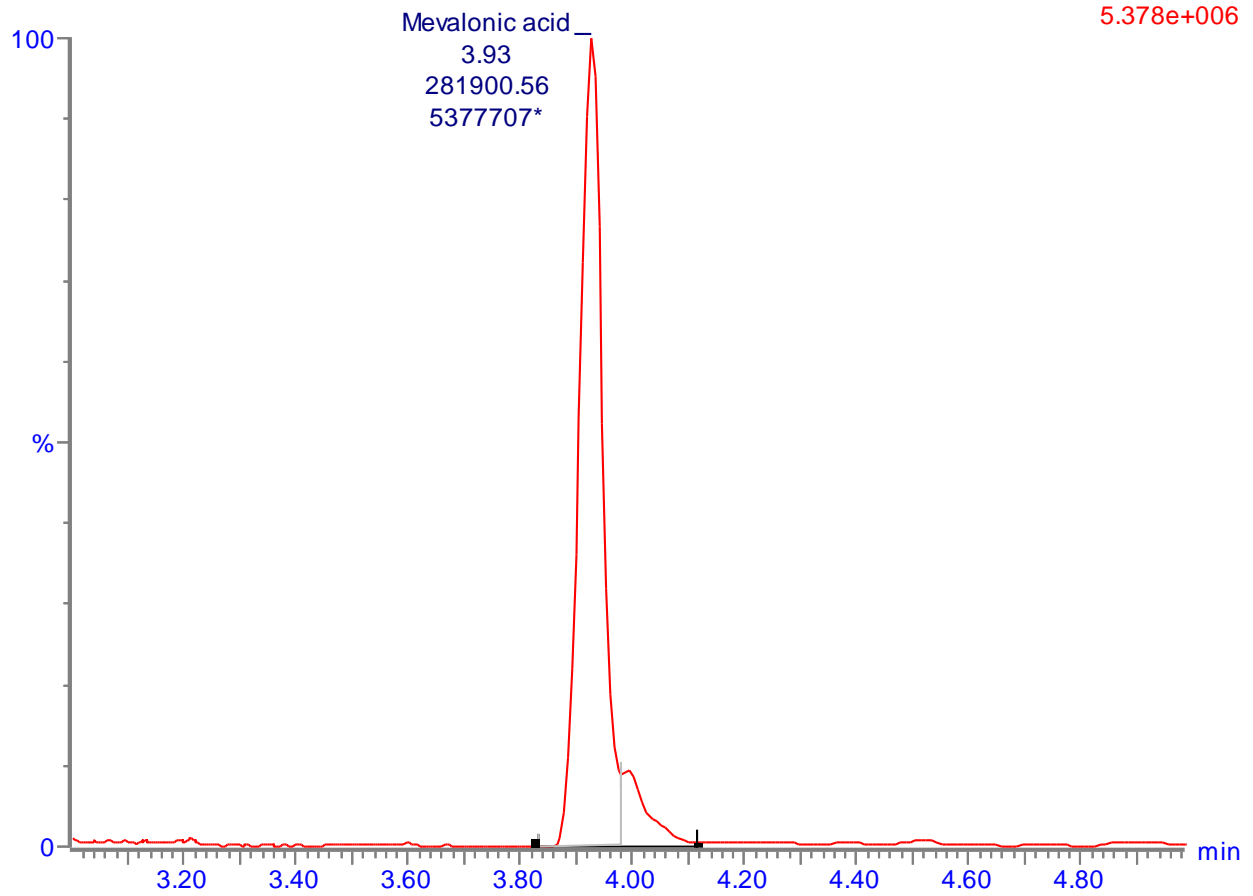

20201009\_acidomics\_method\_0025 Smooth(Mn,2x1)  
Cal curve 021\_100\_ng/mL

F45:MRM of 3 channels,ES+  
255.142 > 209.101  
9.531e+005

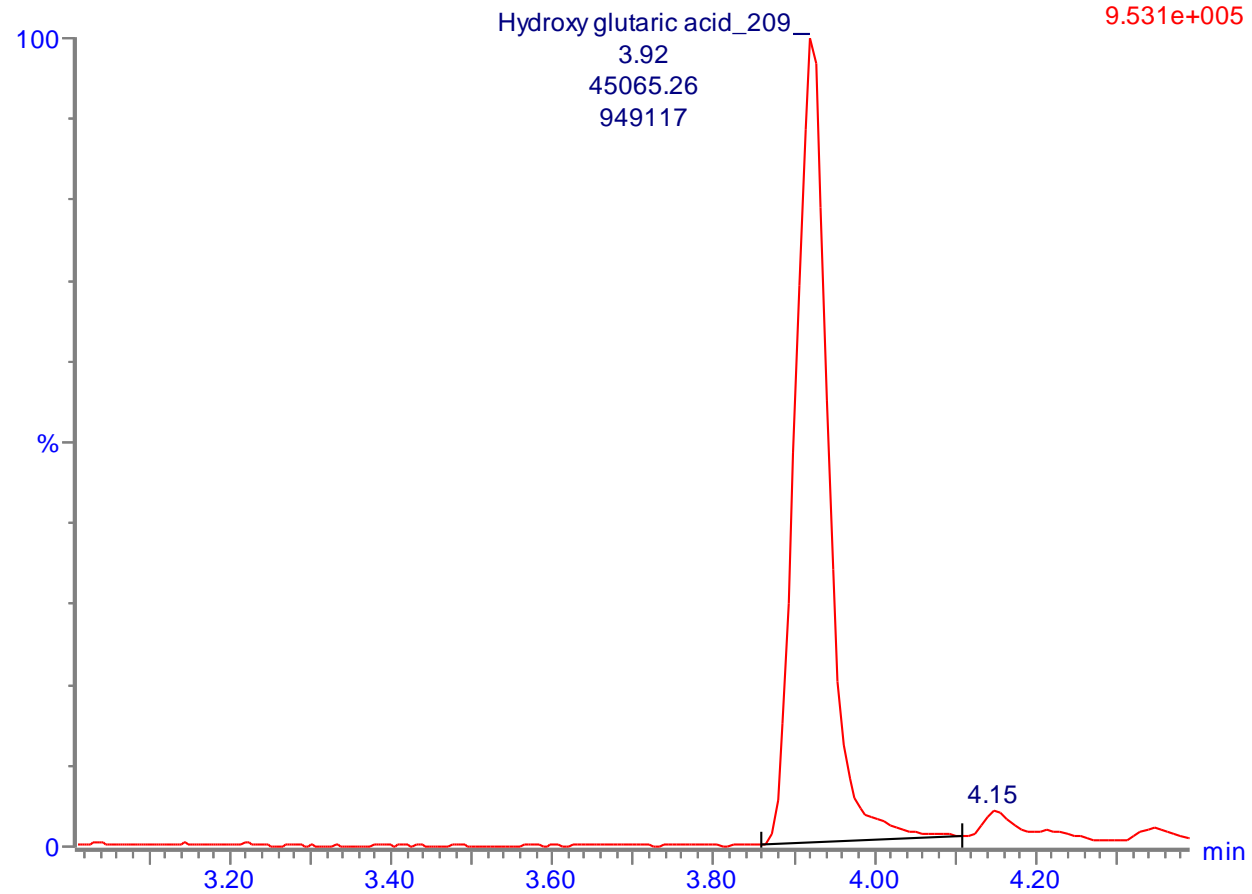

20201009\_acidomics\_method\_0025 Smooth(Mn,2x1)  
Cal curve 021\_100\_ng/mL

F49:MRM of 1 channel,ES+  
265.29 > 166.06  
1.037e+007

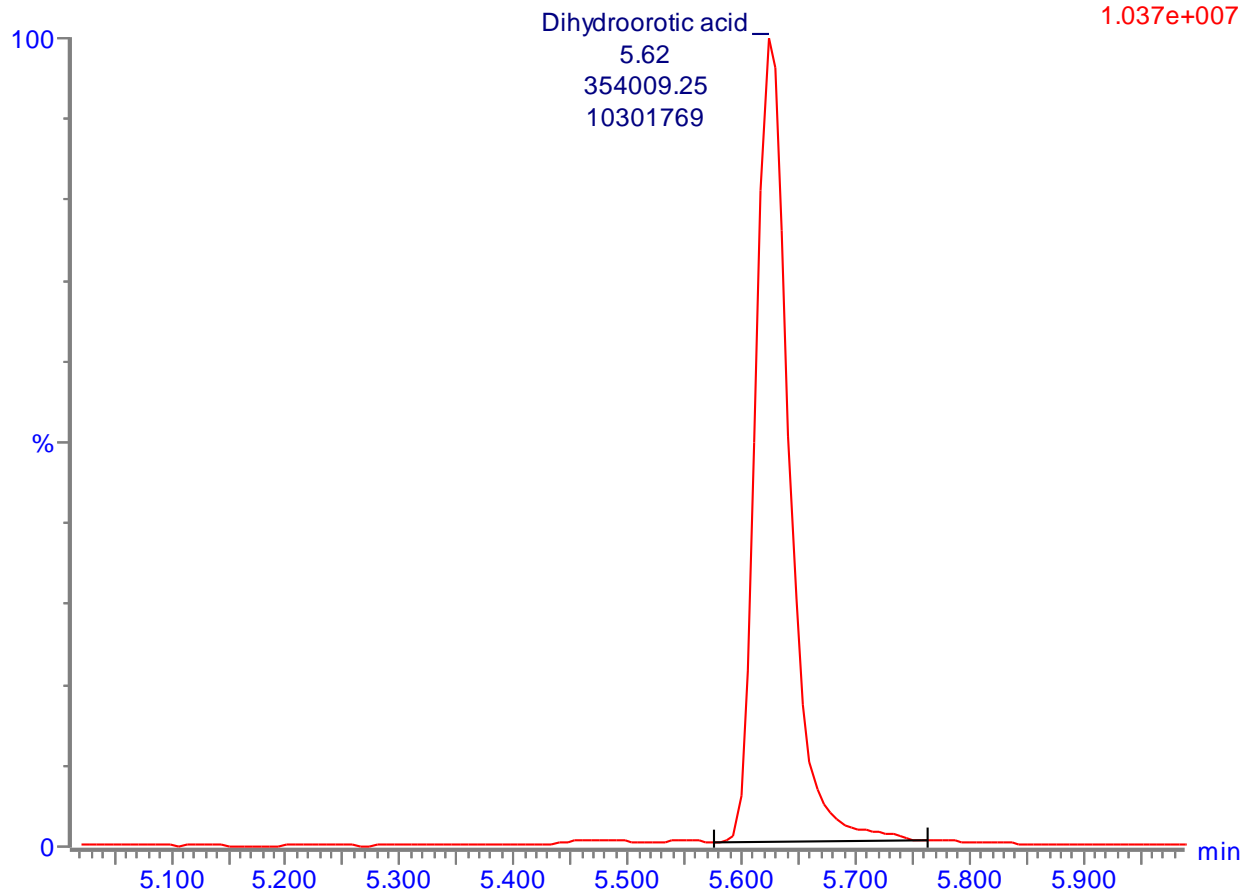

20210504\_acidomics\_cells\_experiment\_0009 Smooth(Mn,2x3)  
Cal curve 008\_500\_ng/mL

F12:MRM of 1 channel,ES+  
267.35 > 180.07  
2.846e+004

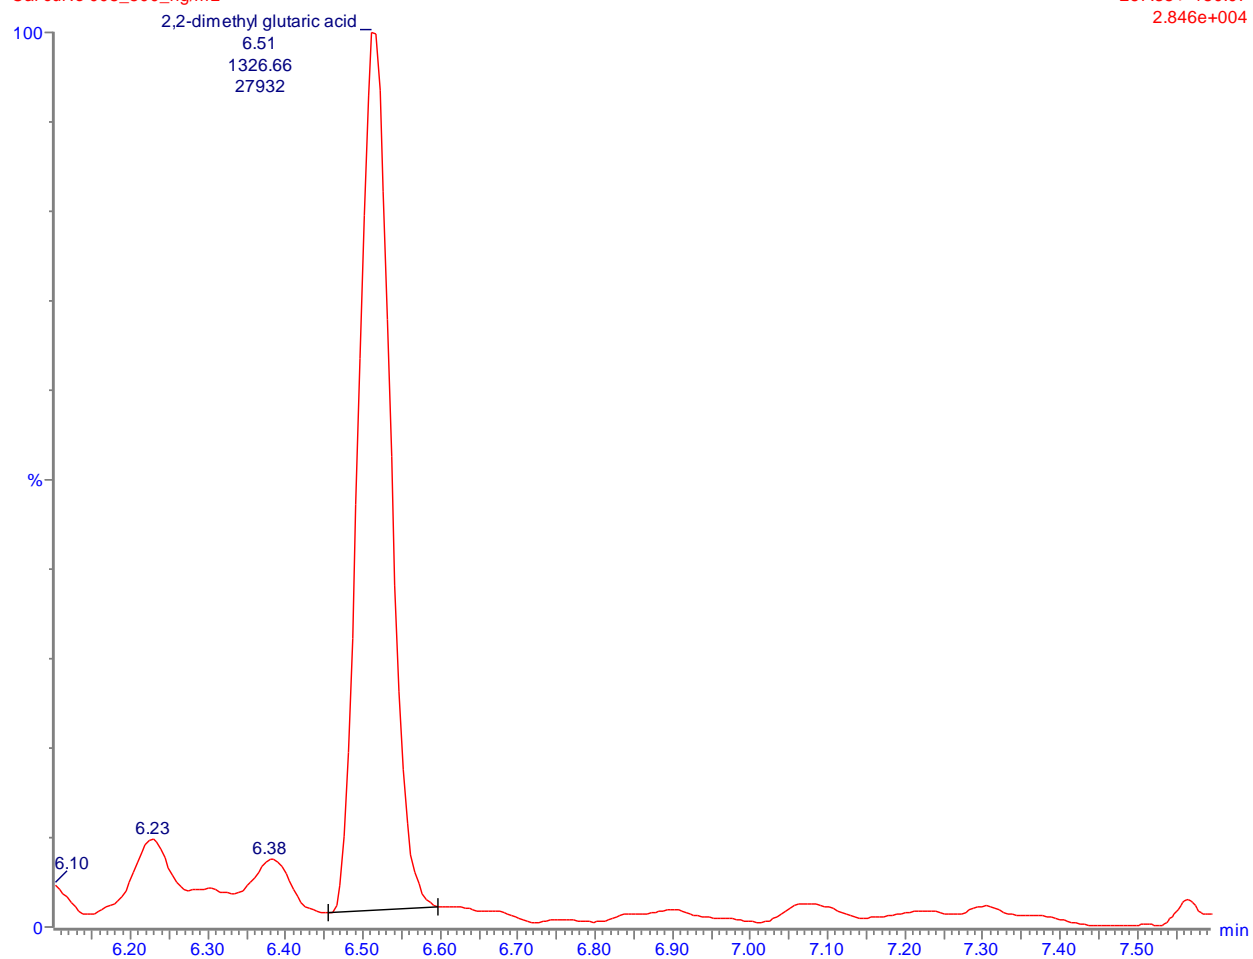

20210504\_acidomics\_cells\_experiment\_0012 Smooth(Mn,2x3)  
Cal curve 011\_5000\_ng/mL

F14:MRM of 2 channels,ES+  
267.39 > 182.02  
4.458e+005

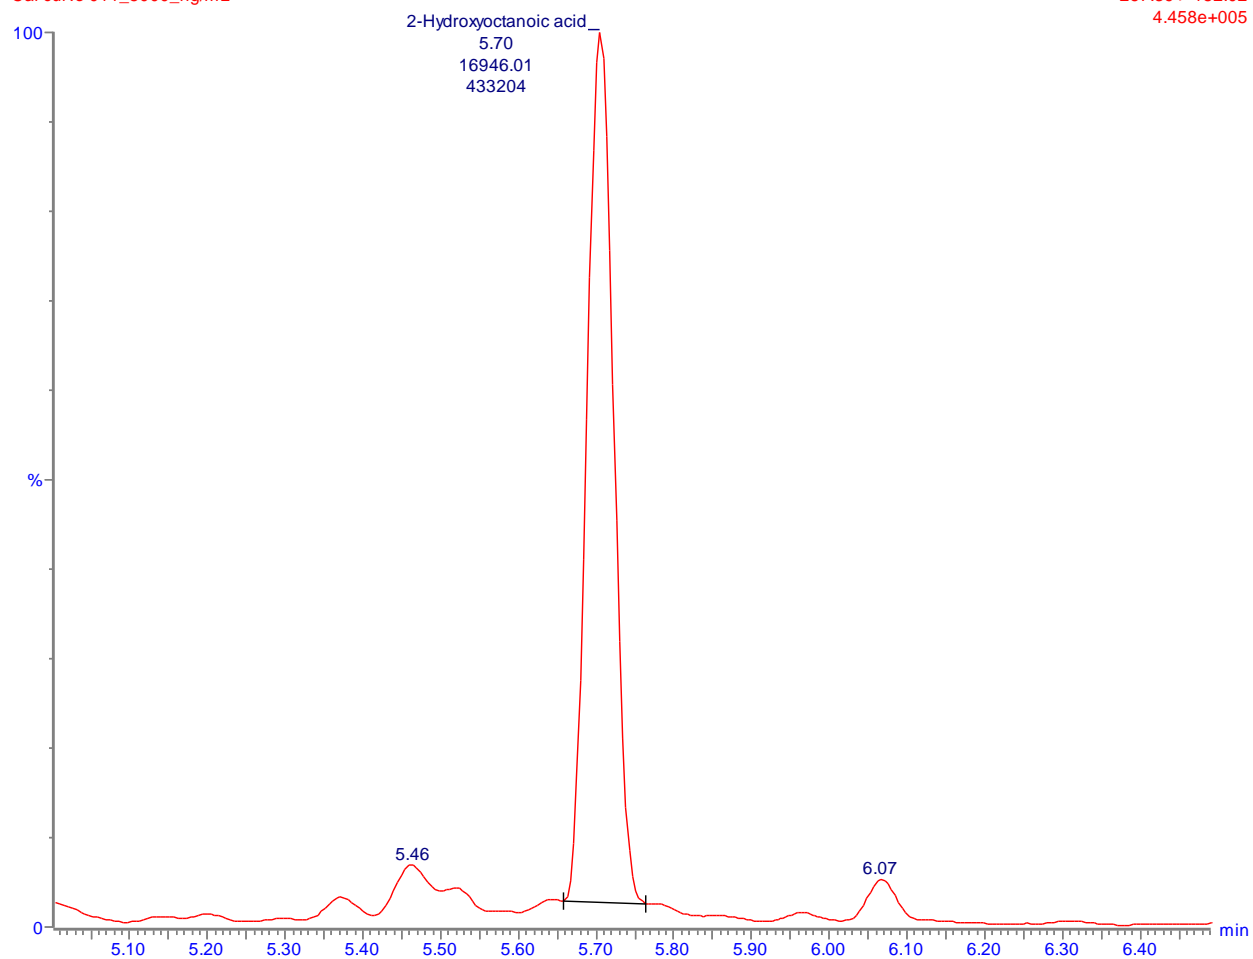

20210504\_acidomics\_cells\_experiment\_0012 Smooth(Mn,2x3)  
Cal curve 011\_5000\_ng/mL

F15:MRM of 2 channels,ES+  
267.39 > 250.12  
6.811e+004

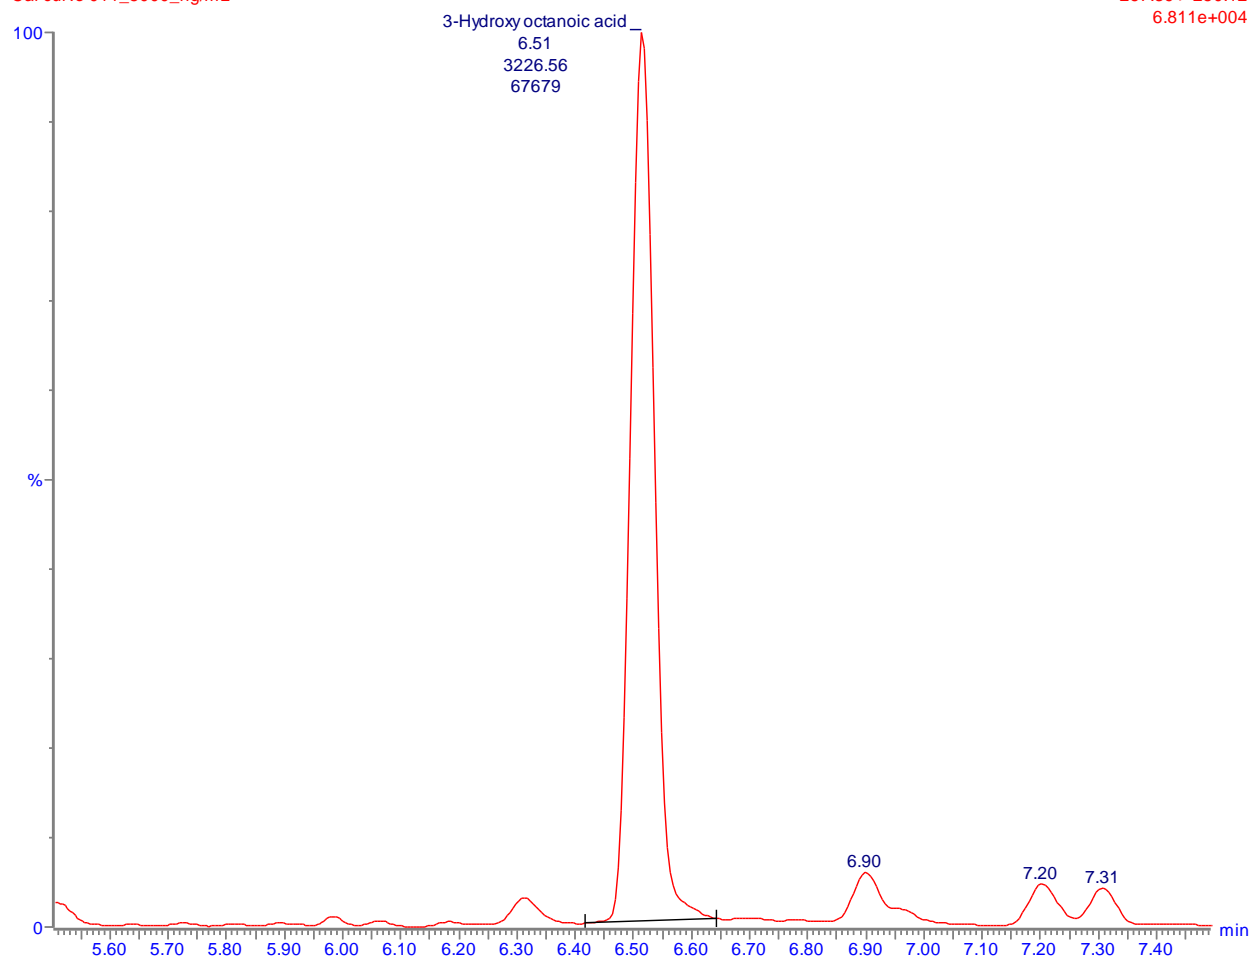

20201009\_acidomics\_method\_0025 Smooth(Mn,2x1)  
Cal curve 021\_100\_ng/mL

F57:MRM of 1 channel,ES+  
286.355 > 166.062  
2.945e+005

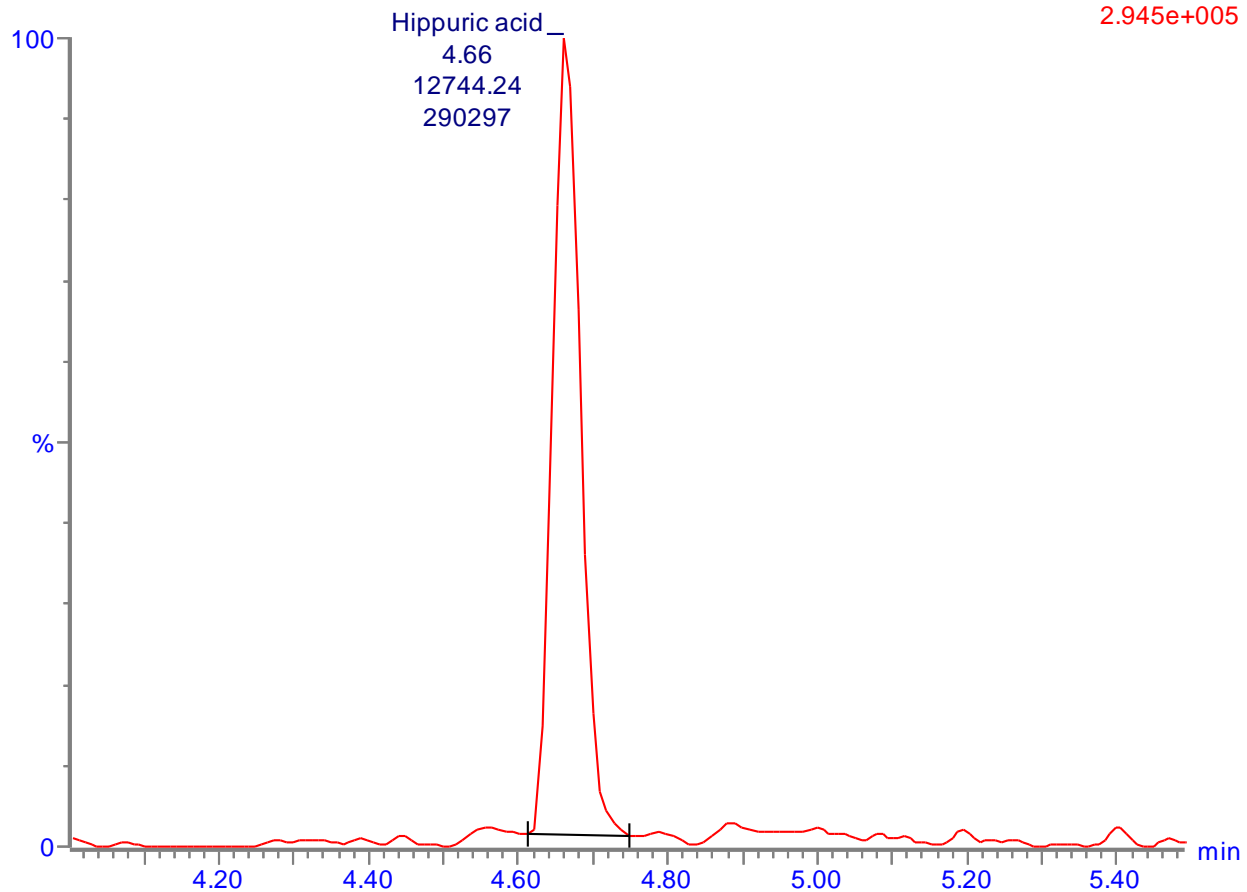



20201009\_acidomics\_method\_0025 Smooth(Mn,2x1)  
Cal curve 021\_100\_ng/mL

F55:MRM of 1 channel,ES+  
281 > 166.06  
3.914e+007

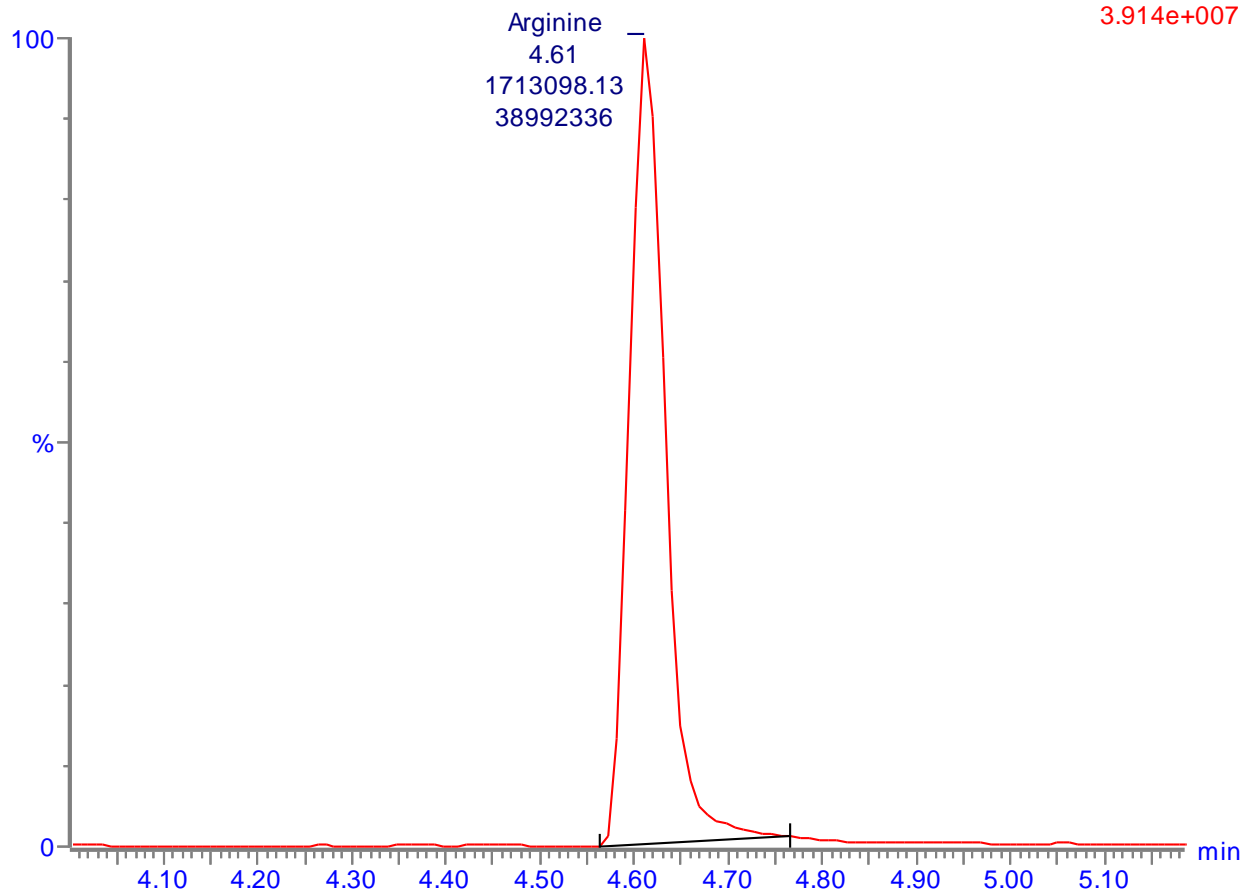

20201009\_acidomics\_method\_0025 Smooth(Mn,2x1)  
Cal curve 021\_100\_ng/mL

F59:MRM of 1 channel,ES+  
291.46 > 166.06  
4.144e+006

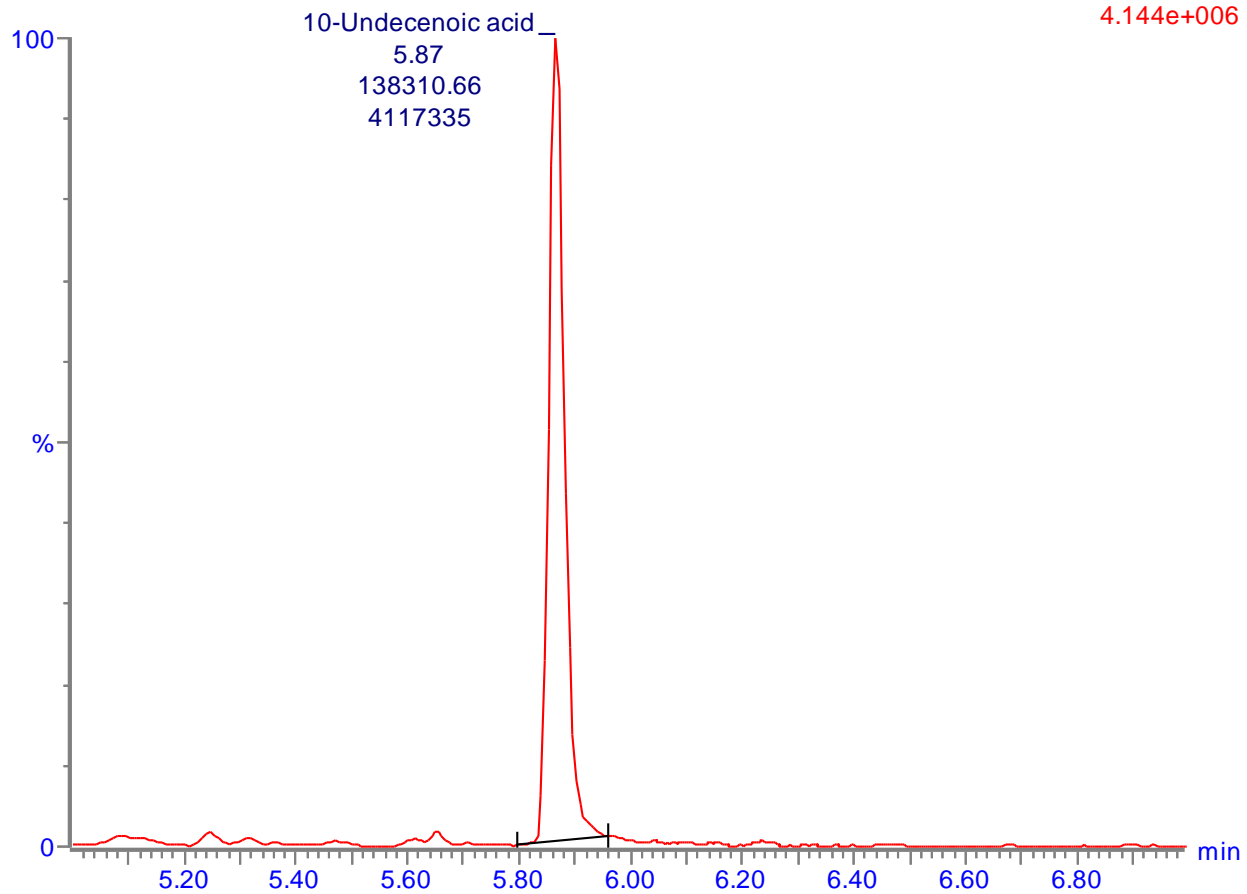

20201009\_acidomics\_method\_0025 Smooth(Mn,2x1)  
Cal curve 021\_100\_ng/mL

F64:MRM of 1 channel,ES+  
321.48 > 166.06  
1.328e+007

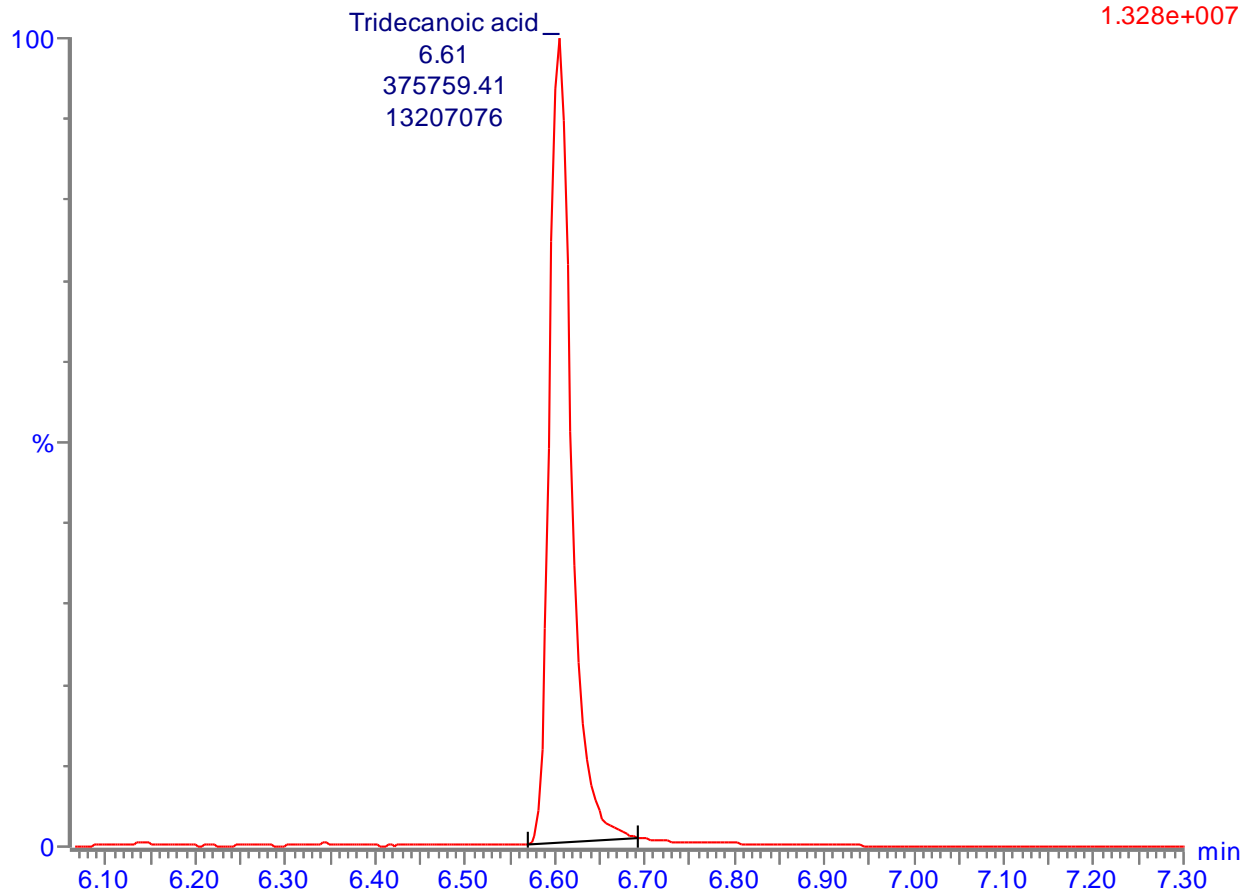

20201009\_acidomics\_method\_0025 Smooth(Mn,2x1)  
Cal curve 021\_100\_ng/mL

F65:MRM of 1 channel,ES+  
323.5 > 166.026  
4.220e+006

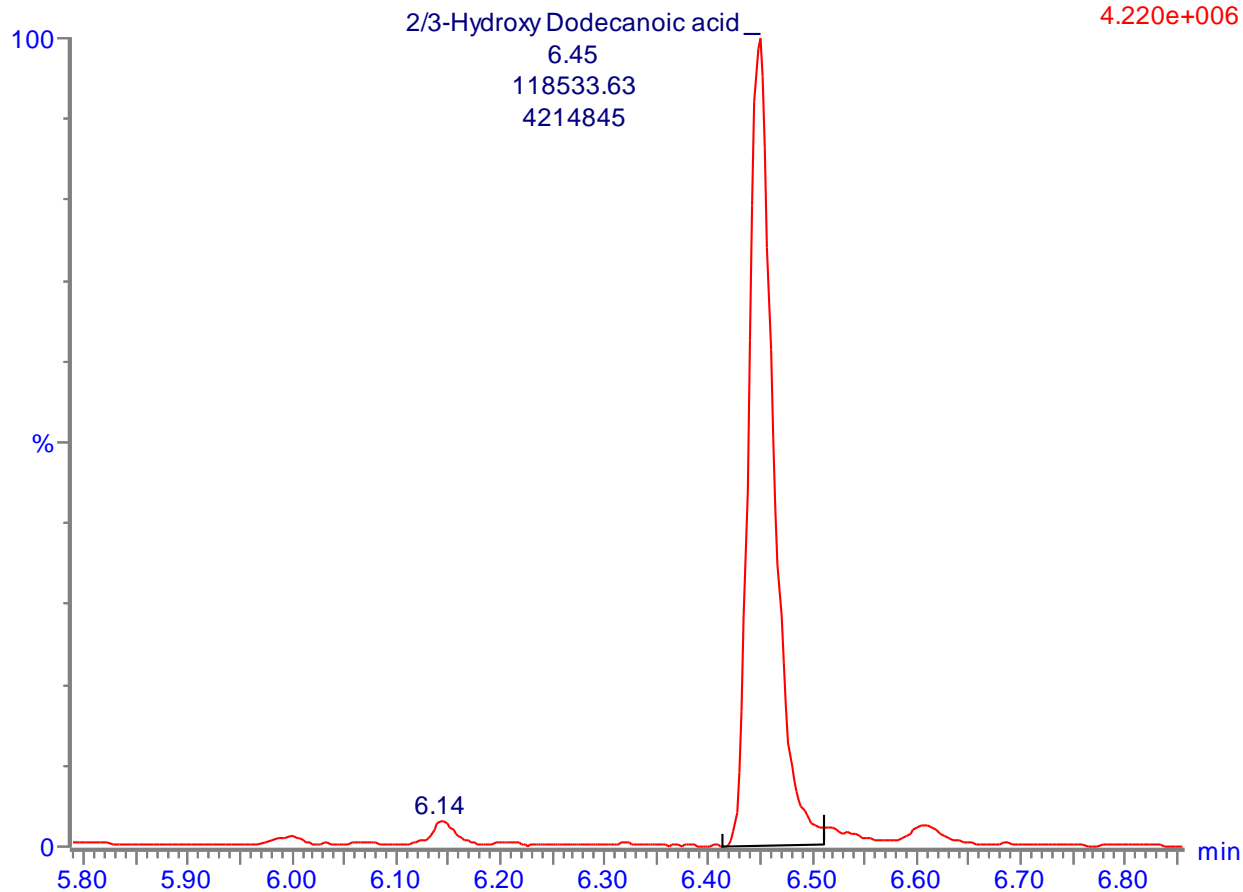

20201009\_acidomics\_method\_0025 Smooth(Mn,2x1)  
Cal curve 021\_100\_ng/mL

F66:MRM of 1 channel,ES+  
335.55 > 166.06  
1.216e+007

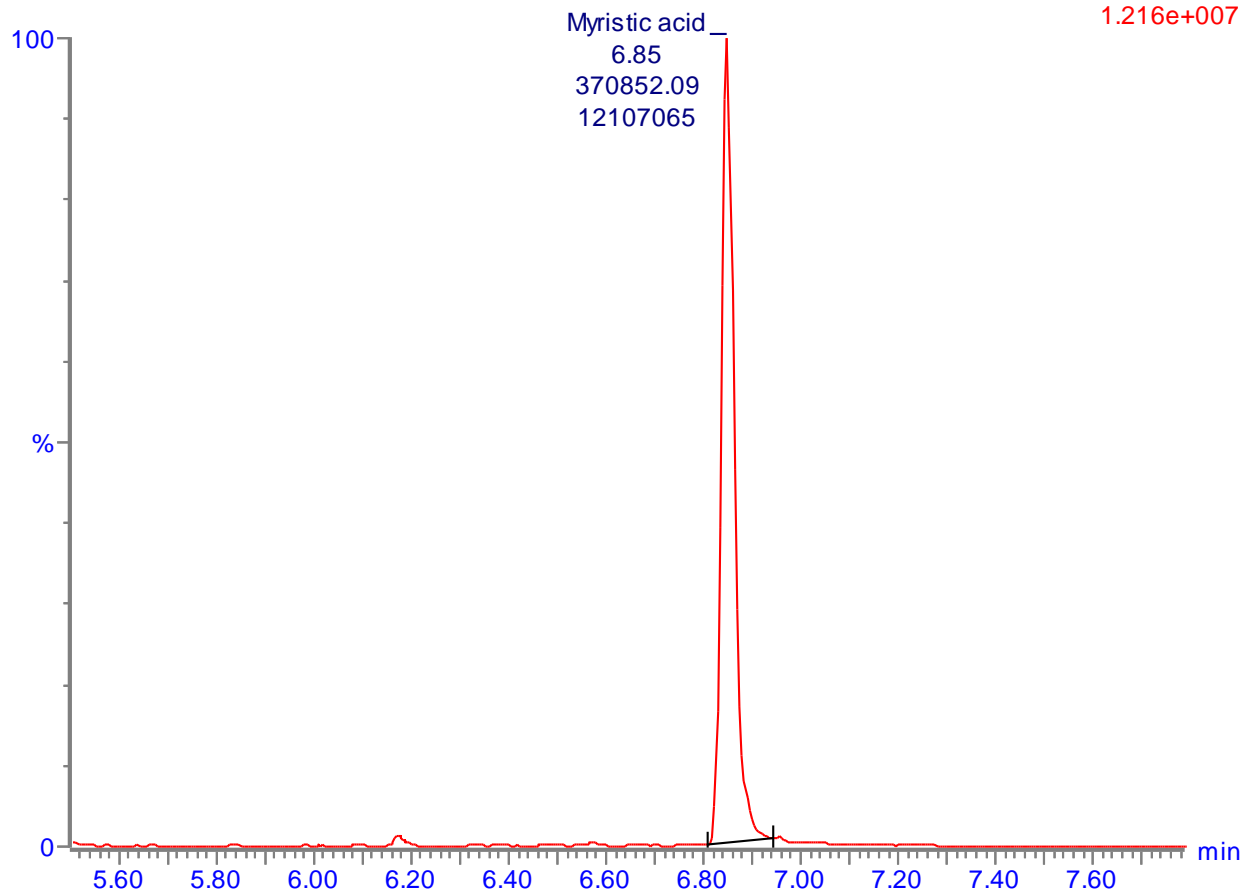

20201009\_acidomics\_method\_0025 Smooth(Mn,2x1)  
Cal curve 021\_100\_ng/mL

F67:MRM of 1 channel,ES+  
337.48 > 165.96  
9.850e+005

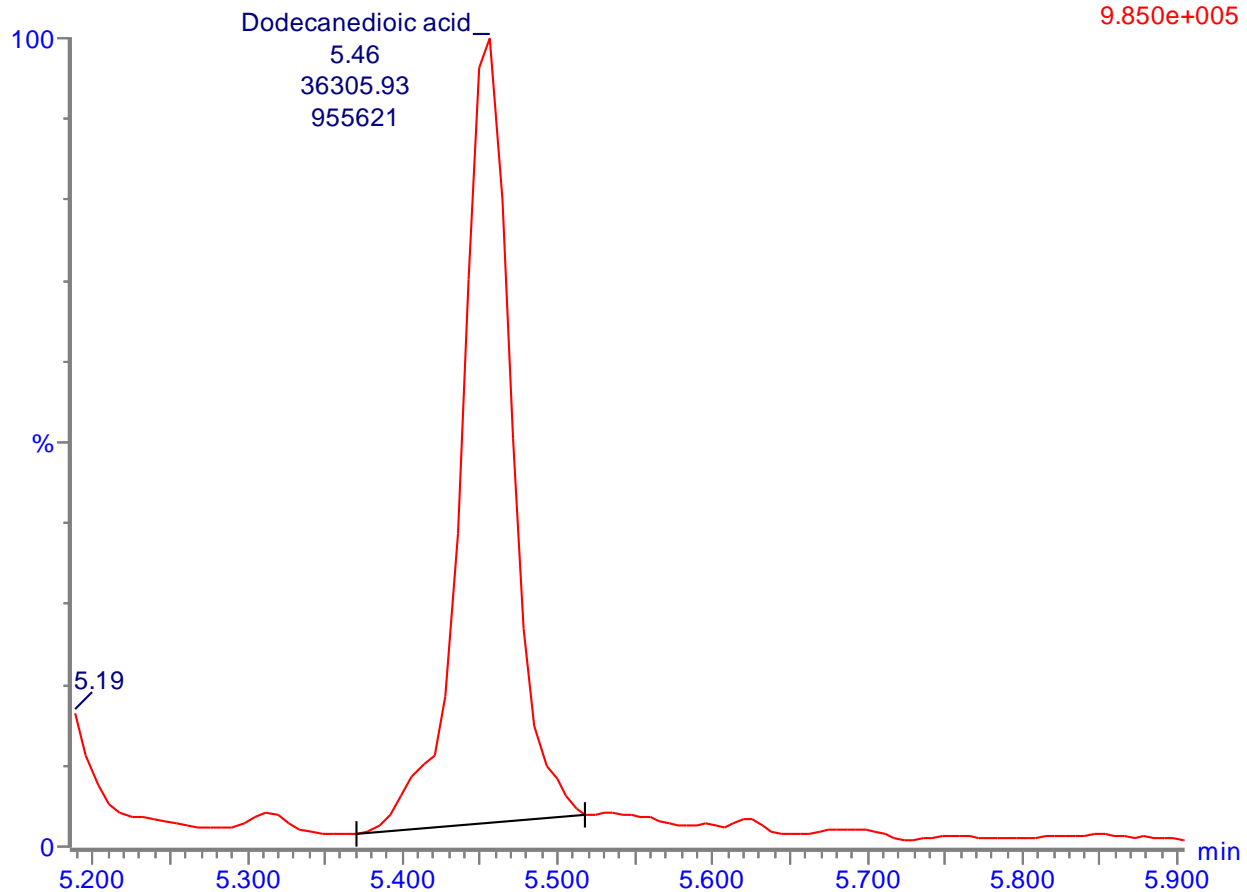

20201009\_acidomics\_method\_0025 Smooth(Mn,2x1)  
Cal curve 021\_100\_ng/mL

F69:MRM of 1 channel,ES+  
351.55 > 166.06  
1.359e+007

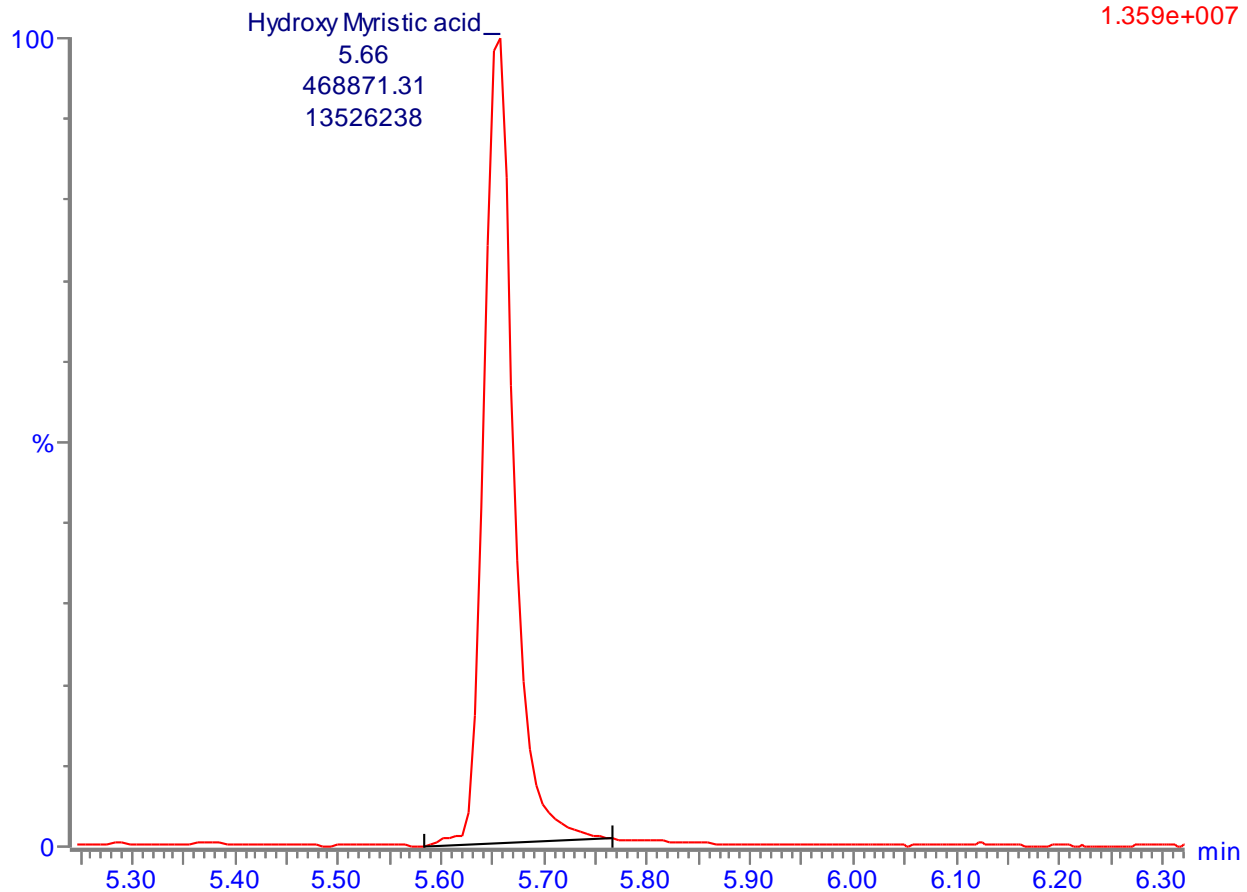

20201009\_acidomics\_method\_0025 Smooth(Mn,2x1)  
Cal curve 021\_100\_ng/mL

F70:MRM of 1 channel,ES+  
349.58 > 166.06  
9.112e+006

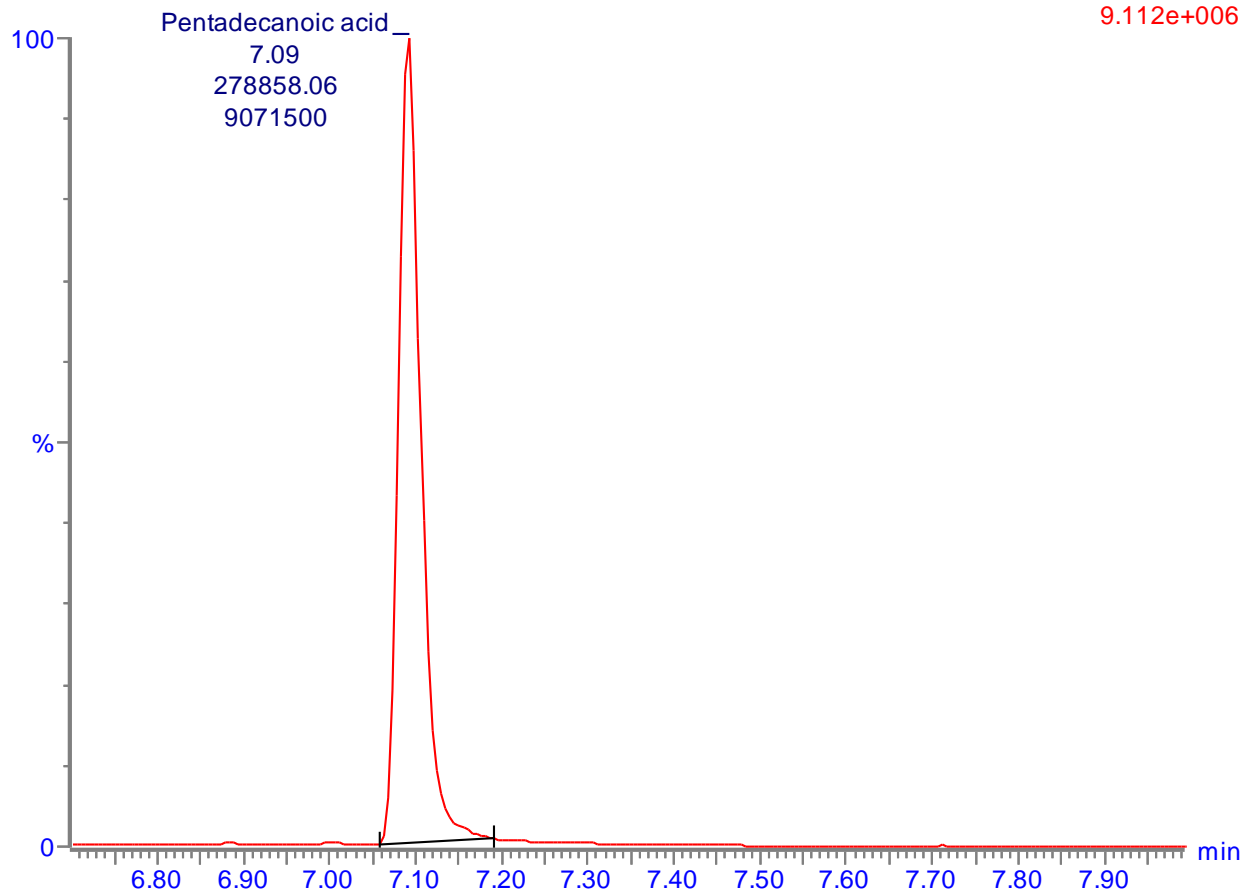



20201009\_acidomics\_method\_0025 Smooth(Mn,2x1)  
Cal curve 021\_100\_ng/mL

F73:MRM of 1 channel,ES+  
361.59 > 166.06  
3.050e+006

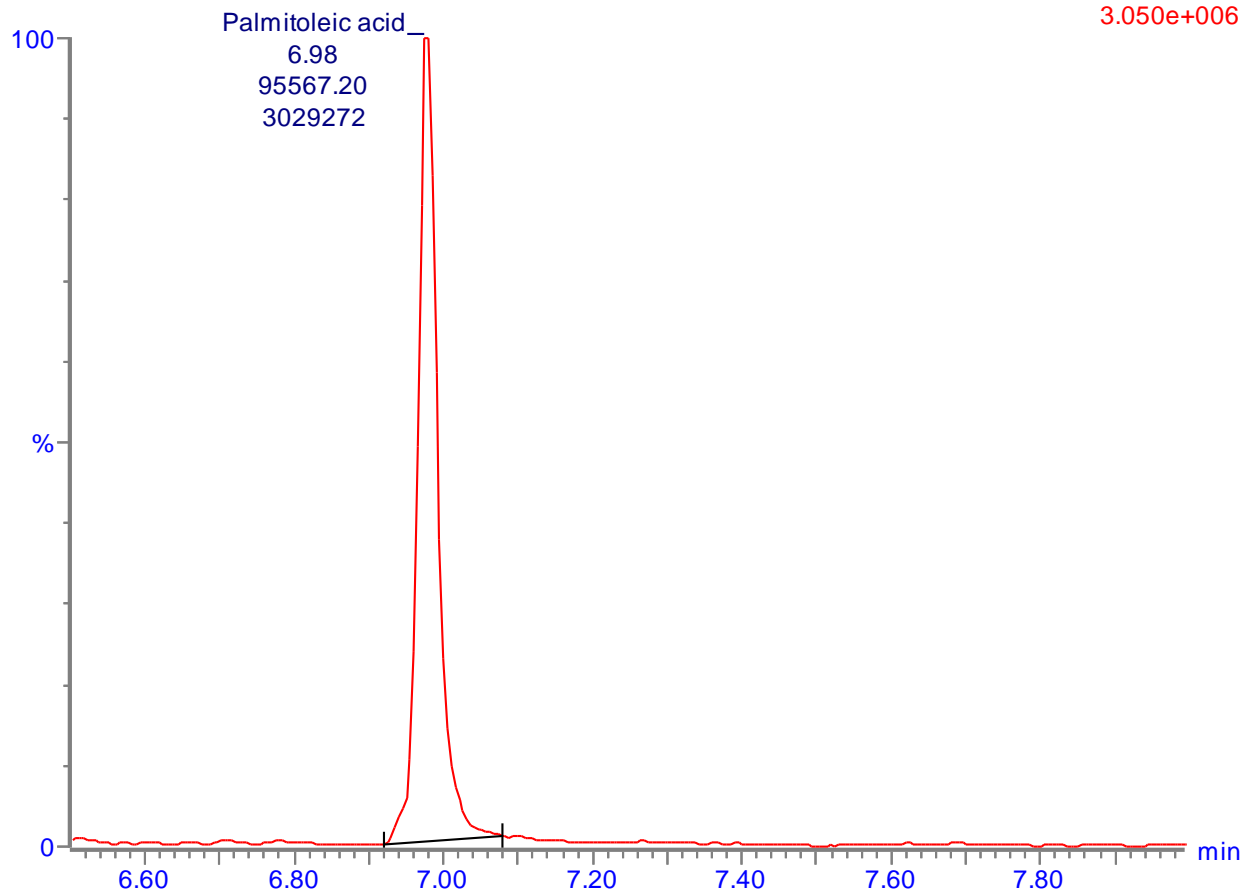

20201009\_acidomics\_method\_0025 Smooth(Mn,2x1)  
Cal curve 021\_100\_ng/mL

F77:MRM of 1 channel,ES+  
375.58 > 166.06  
1.159e+007

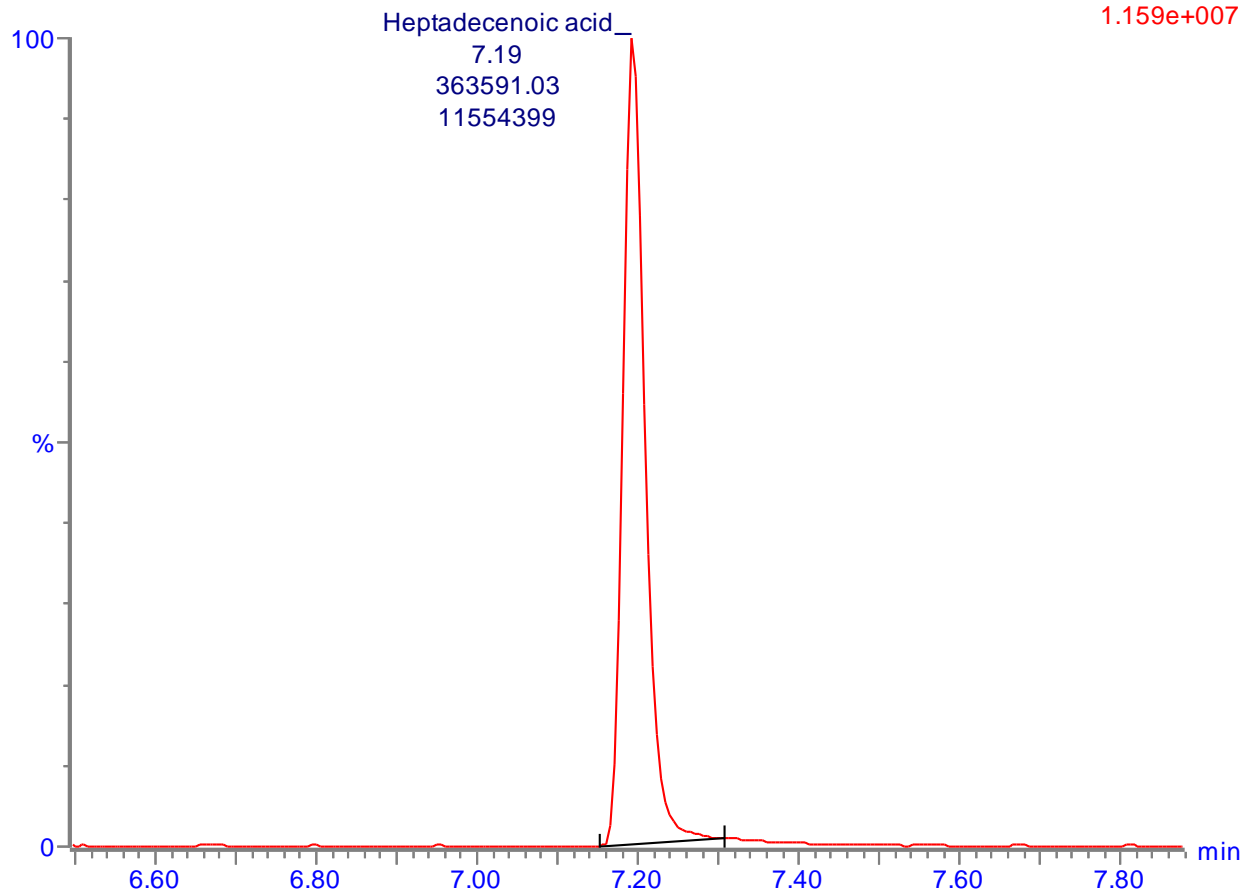

20201009\_acidomics\_method\_0025 Smooth(Mn,2x1)  
Cal curve 021\_100\_ng/mL

F84:MRM of 1 channel,ES+  
377.63 > 166.06  
1.004e+007

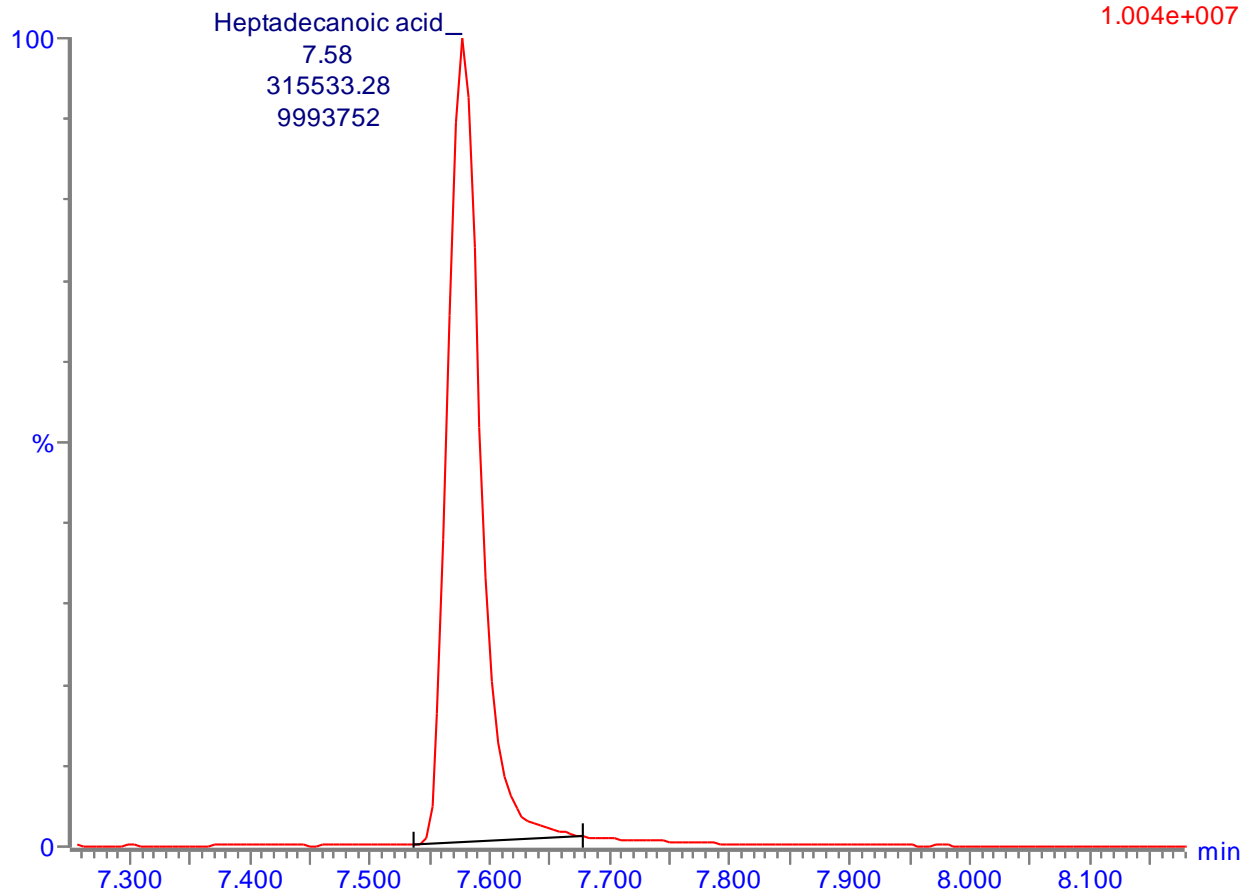

20201009\_acidomics\_method\_0025 Smooth(Mn,2x1)  
Cal curve 021\_100\_ng/mL

F76:MRM of 1 channel,ES+  
379.6 > 166.06  
9.961e+006

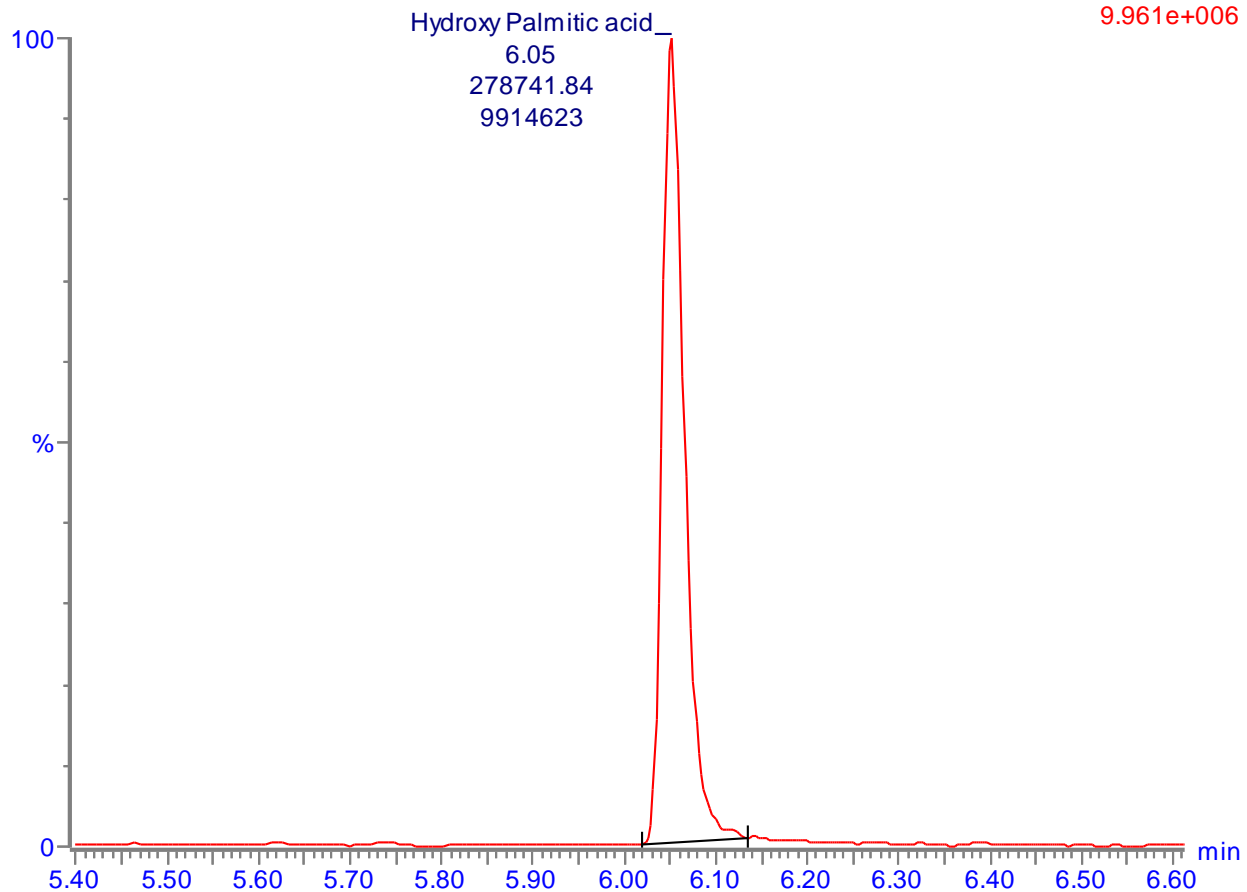

20201009\_acidomics\_method\_0025 Smooth(Mn,2x1)  
Cal curve 021\_100\_ng/mL

F82:MRM of 1 channel,ES+  
387.63 > 166.06  
6.548e+005

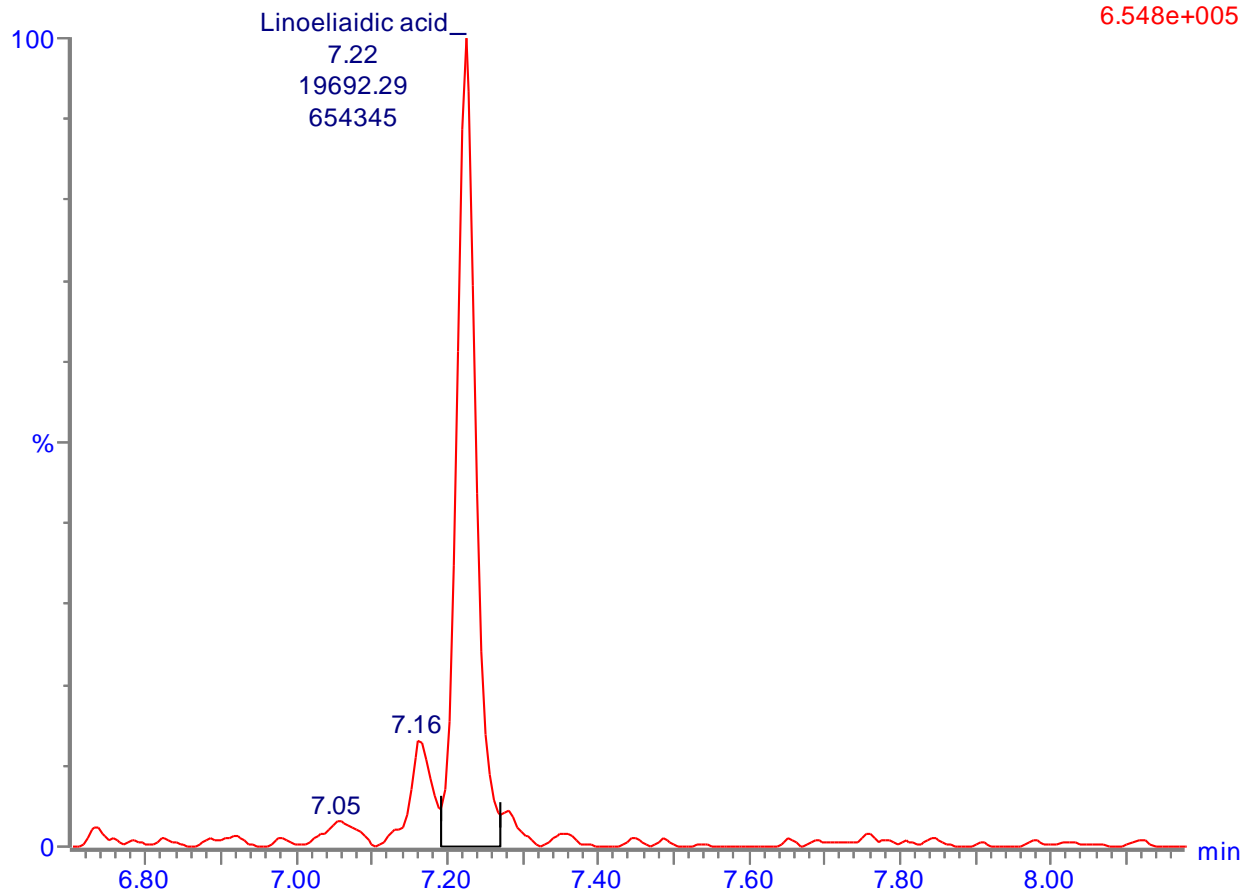

20201009\_acidomics\_method\_0025 Smooth(Mn,2x1)  
Cal curve 021\_100\_ng/mL

F81:MRM of 1 channel,ES+  
387.68 > 166.06  
6.923e+005

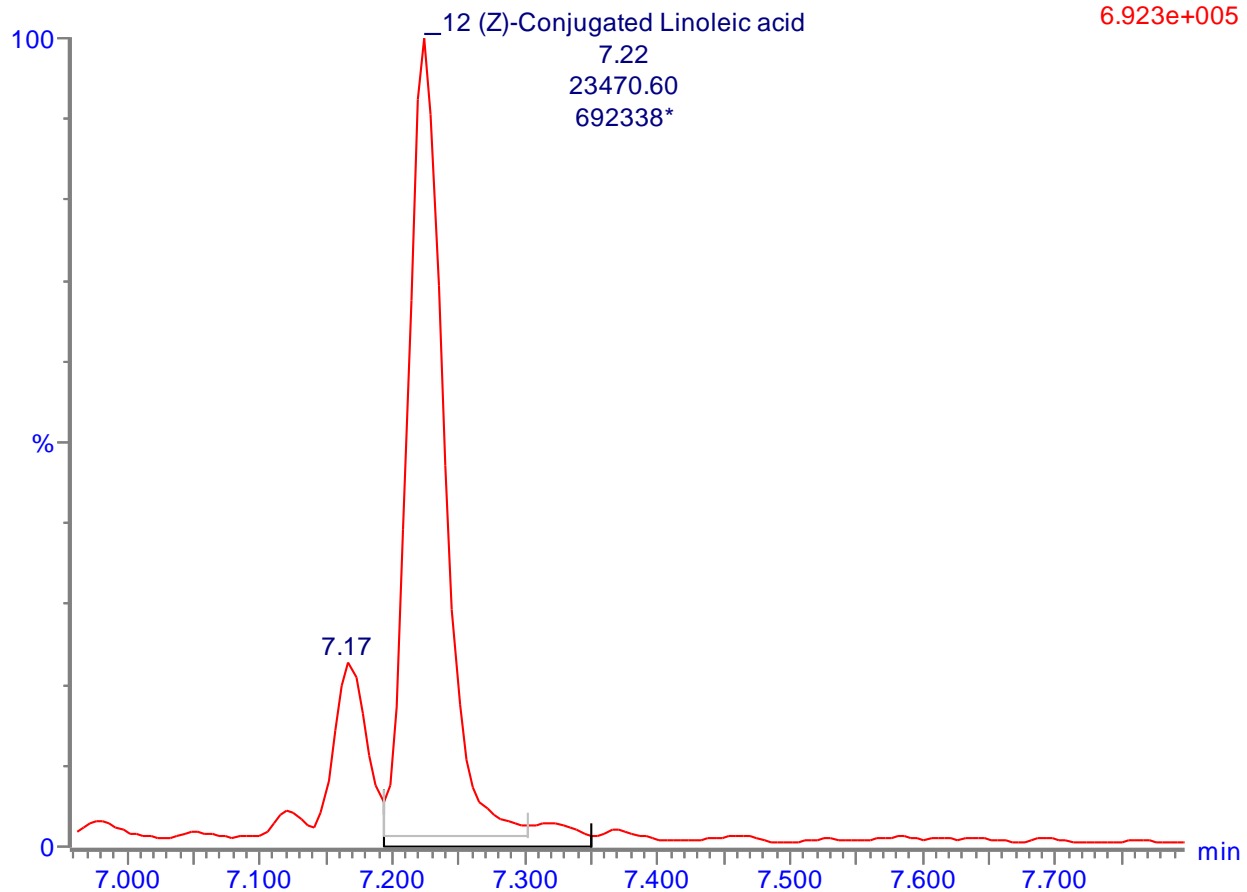

20201009\_acidomics\_method\_0025 Smooth(Mn,2x1)  
Cal curve 021\_100\_ng/mL

F79:MRM of 1 channel,ES+  
389.64 > 166.06  
7.000e+006

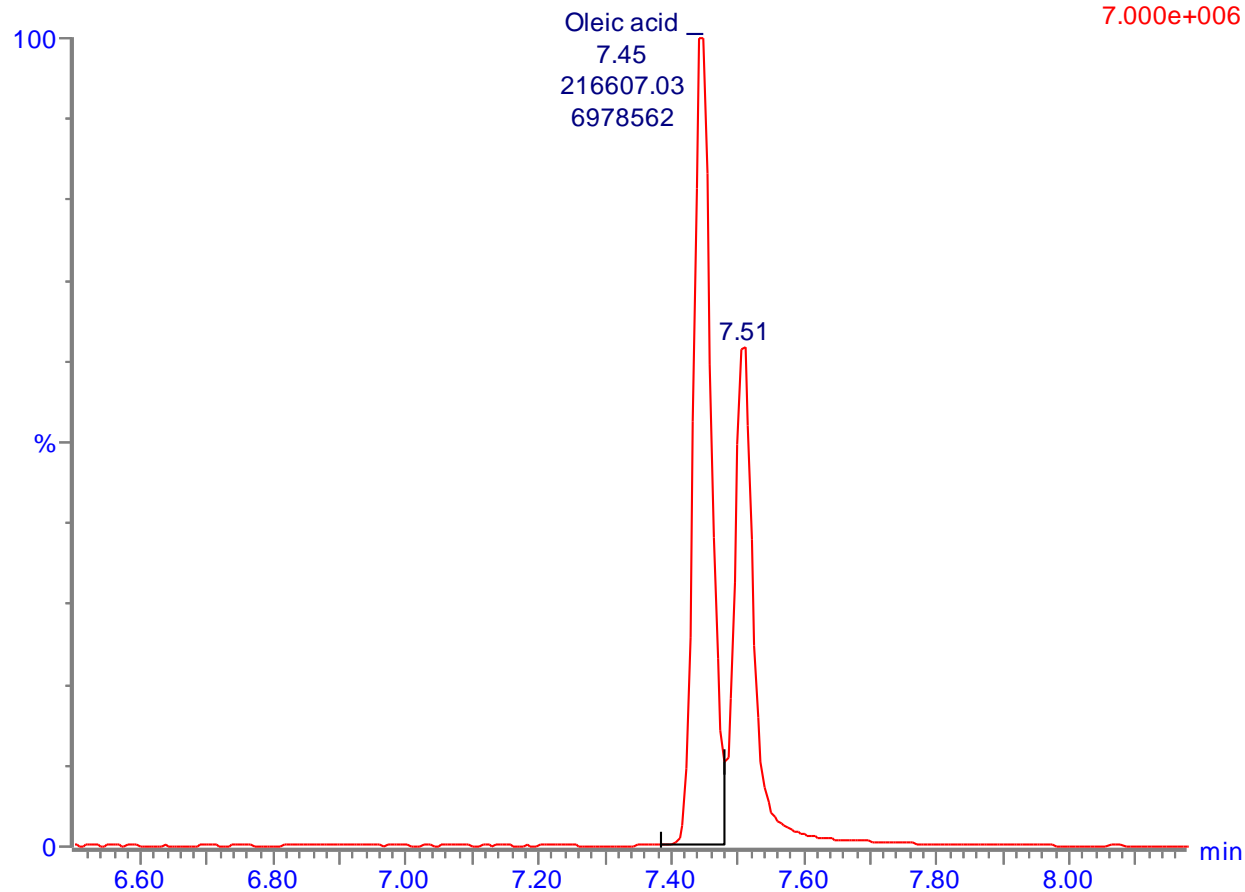

20201009\_acidomics\_method\_0025 Smooth(Mn,2x1)  
Cal curve 021\_100\_ng/mL

F85:MRM of 1 channel,ES+  
391.66 > 166.06  
5.950e+006

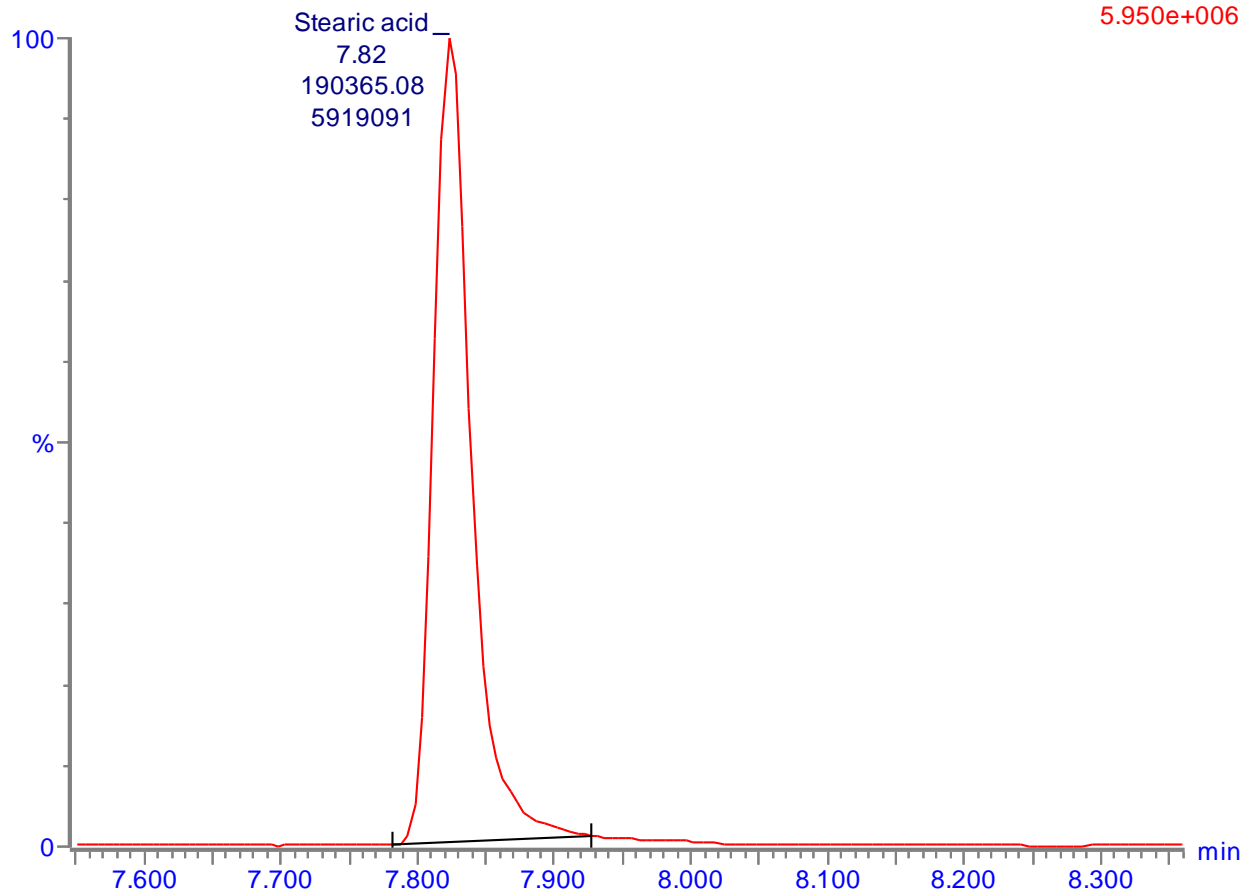



20201009\_acidomics\_method\_0025 Smooth(Mn,2x1)  
Cal curve 021\_100\_ng/mL

F78:MRM of 1 channel,ES+  
407.58 > 166.06  
1.374e+007

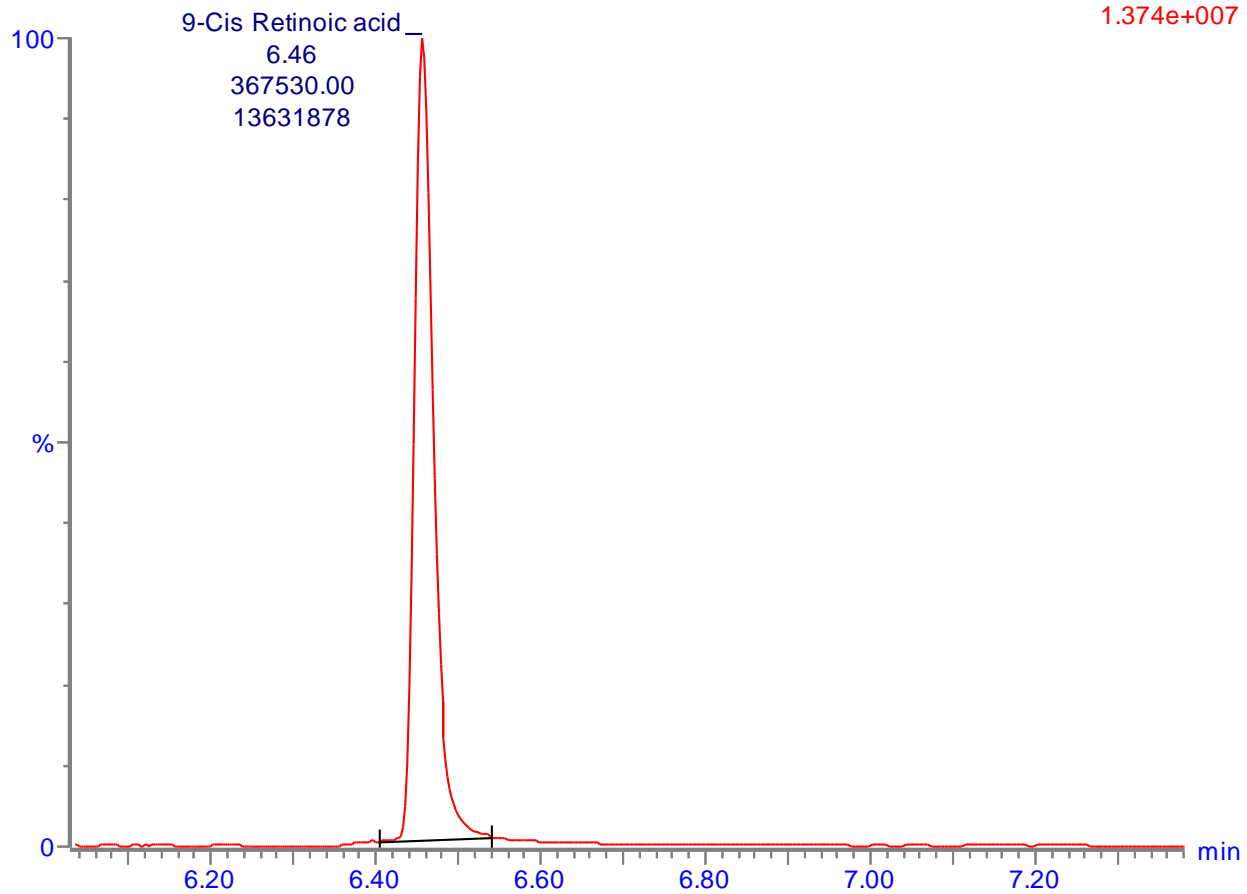

20201009\_acidomics\_method\_0025 Smooth(Mn,2x1)  
Cal curve 021\_100\_ng/mL

F80:MRM of 1 channel,ES+  
409.63 > 166.06  
3.165e+005

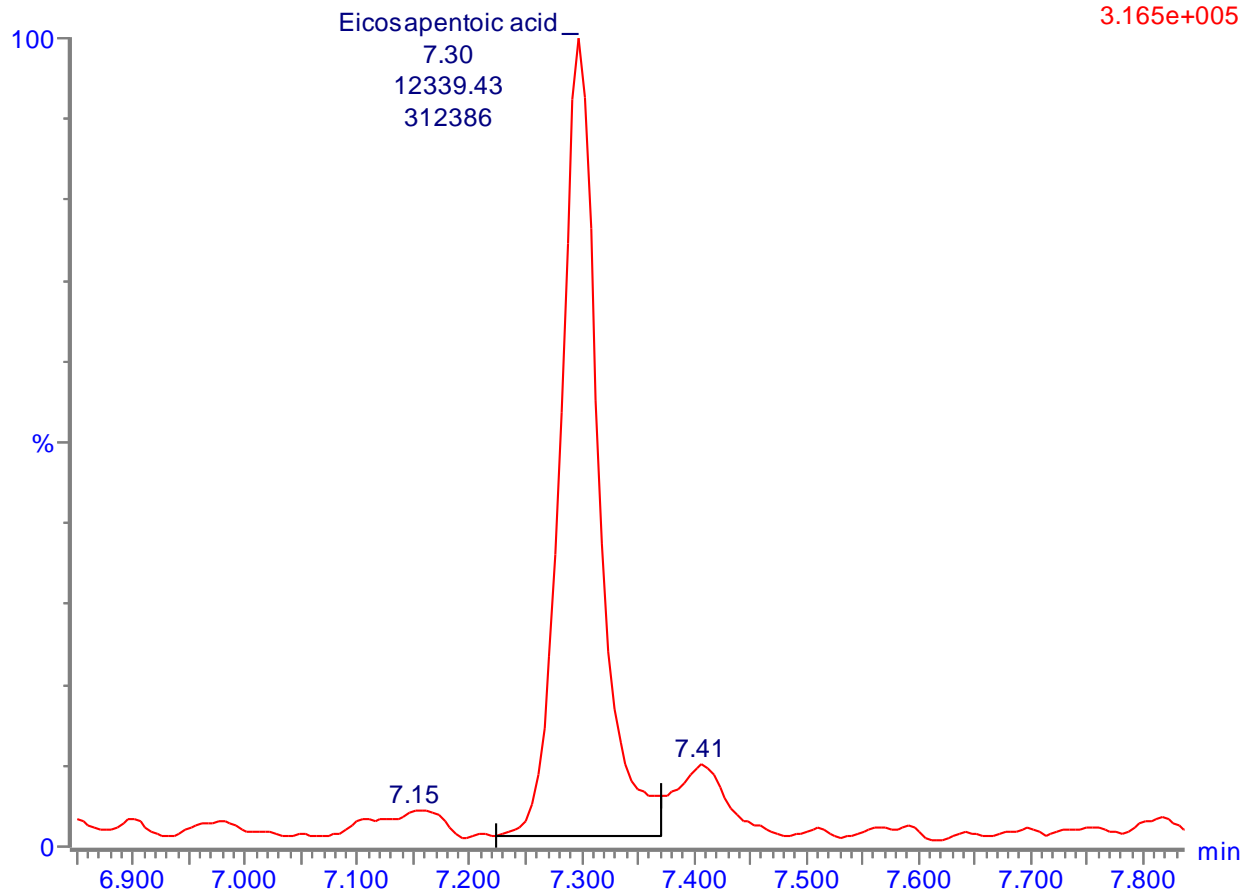

20201009\_acidomics\_method\_0025 Smooth(Mn,2x1)  
Cal curve 021\_100\_ng/mL

F87:MRM of 2 channels,ES+  
411.65 > 165.96  
2.319e+005

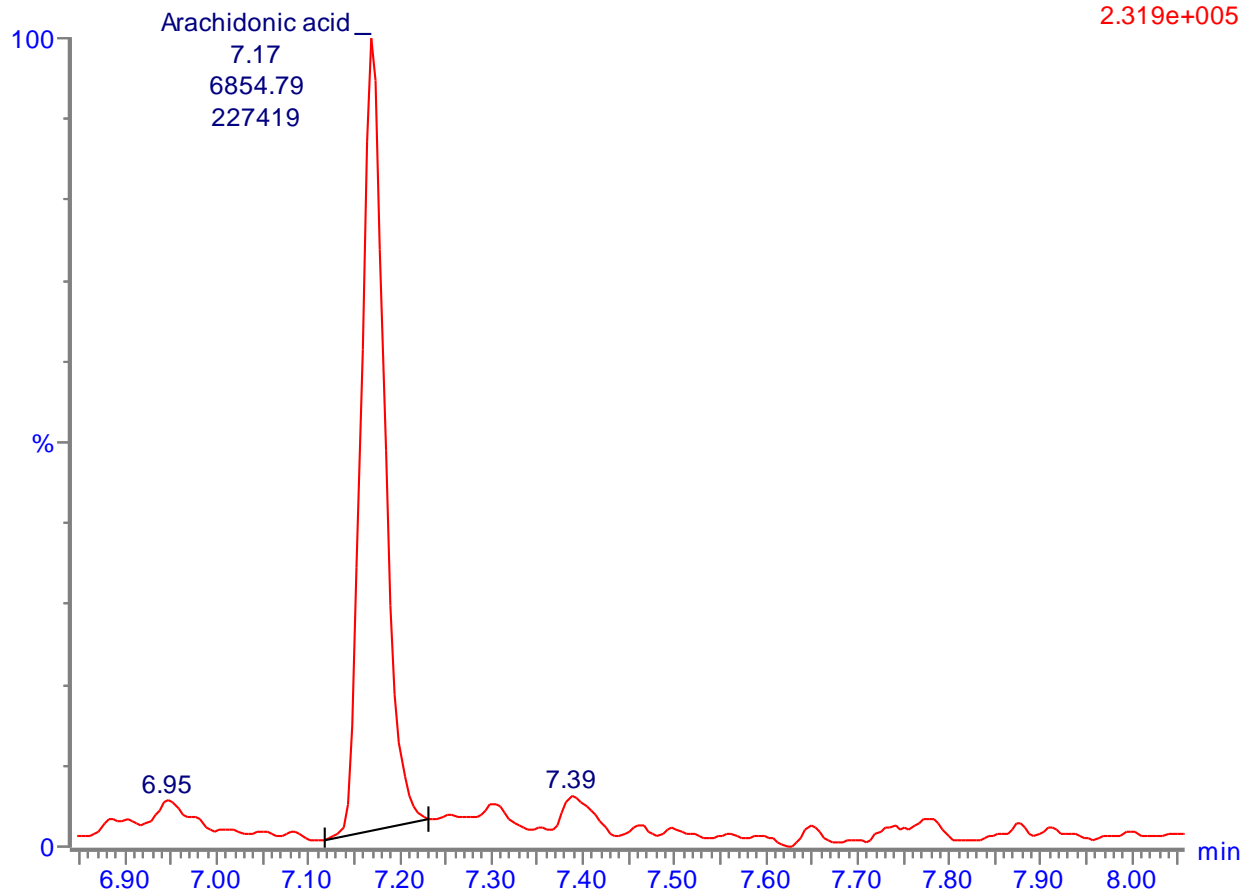

20201009\_acidomics\_method\_0025 Smooth(Mn,2x1)  
Cal curve 021\_100\_ng/mL

F91:MRM of 1 channel,ES+  
435.67 > 166.06  
2.438e+006

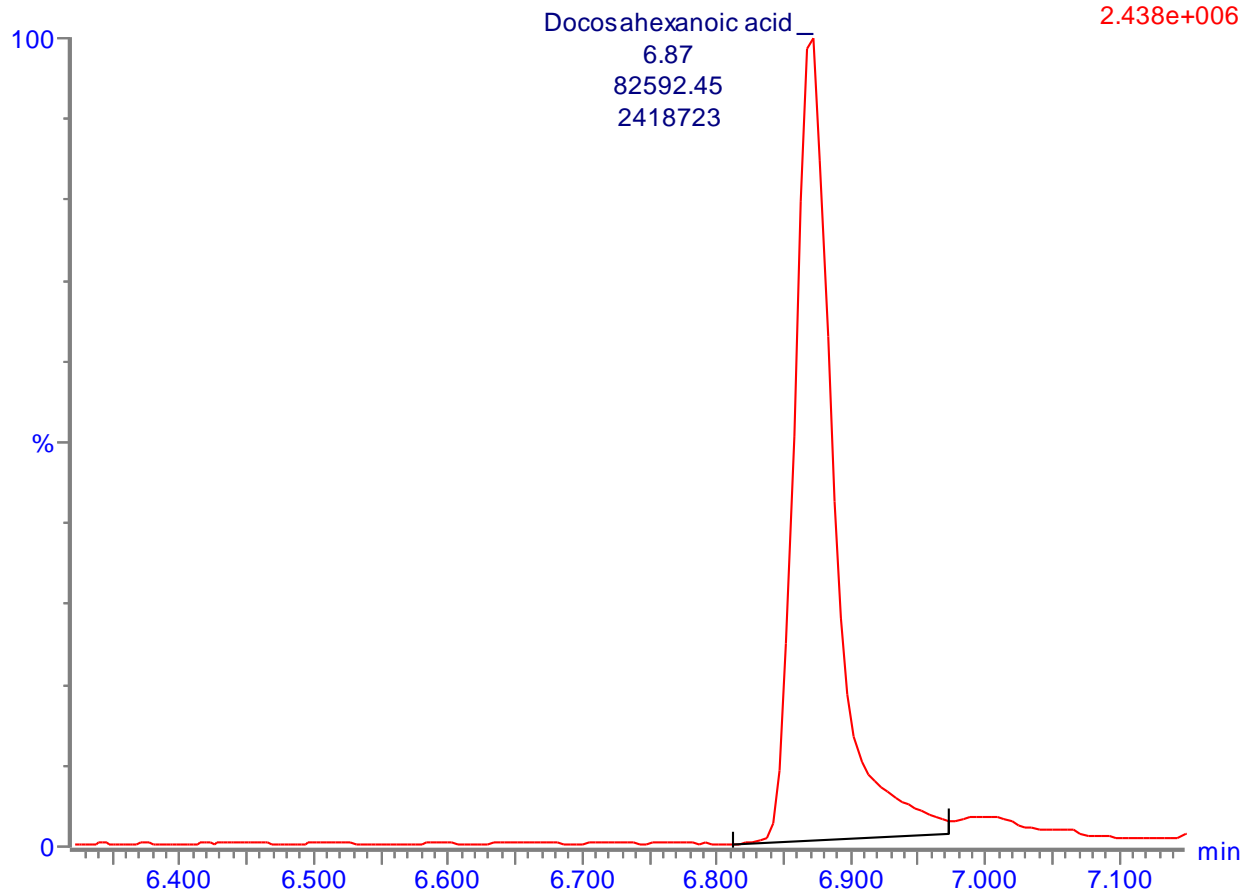

20201009\_acidomics\_method\_0025 Smooth(Mn,2x1)  
Cal curve 021\_100\_ng/mL

F95:MRM of 1 channel,ES+  
433.74 > 166.06  
7.103e+005

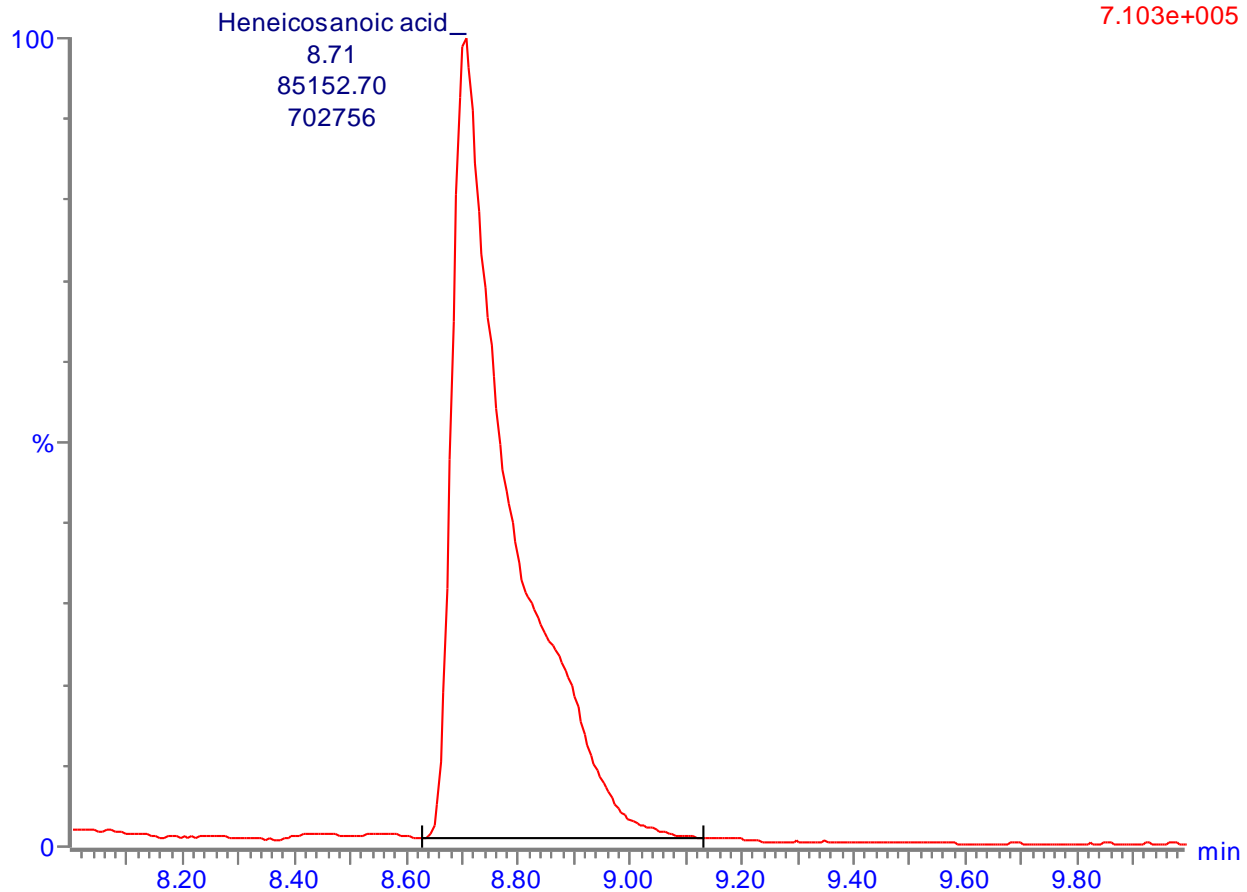

20201009\_acidomics\_method\_0025 Smooth(Mn,2x1)  
Cal curve 021\_100\_ng/mL

F98:MRM of 1 channel,ES+  
445.75 > 166.06  
3.298e+006

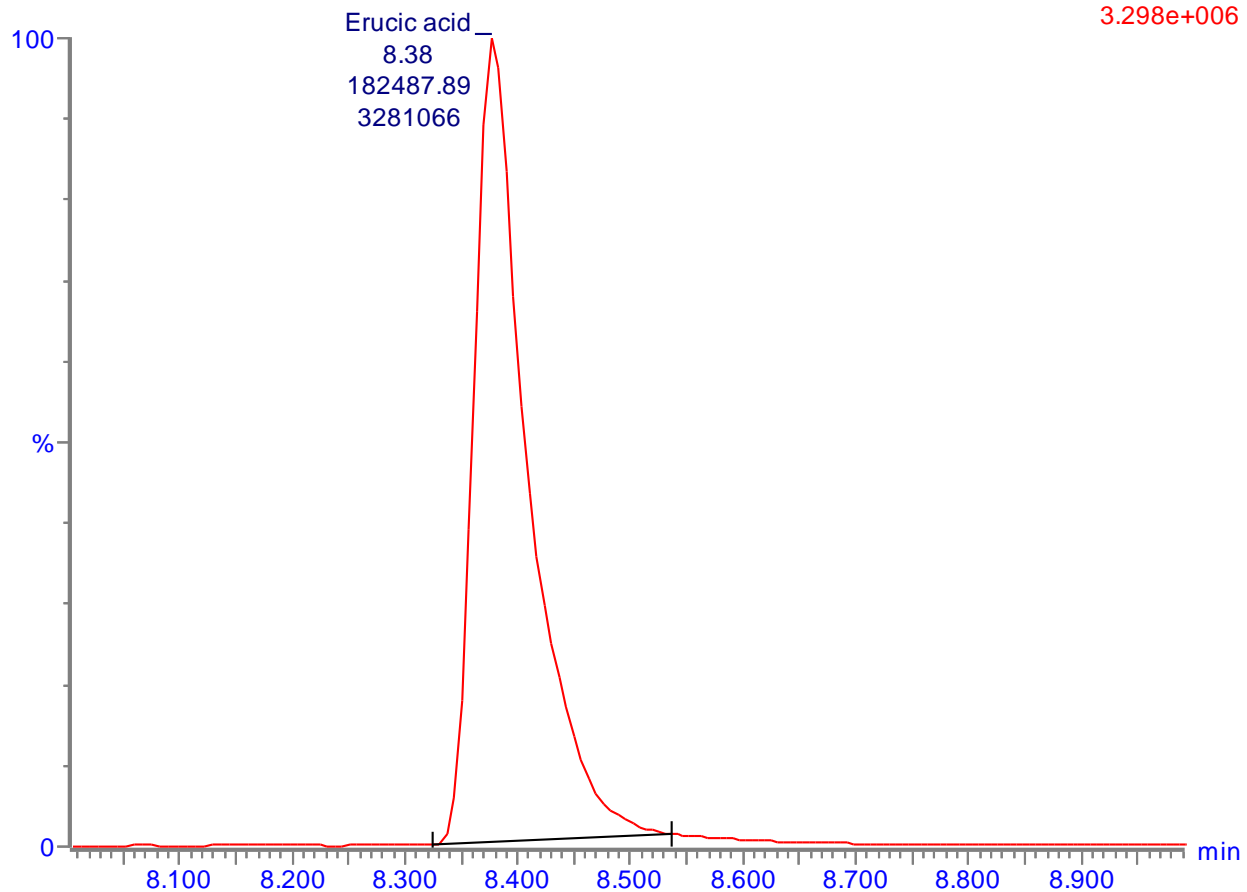

20201009\_acidomics\_method\_0025 Smooth(Mn,2x1)  
Cal curve 021\_100\_ng/mL

F99:MRM of 1 channel,ES+  
450.3 > 166.06  
1.998e+004

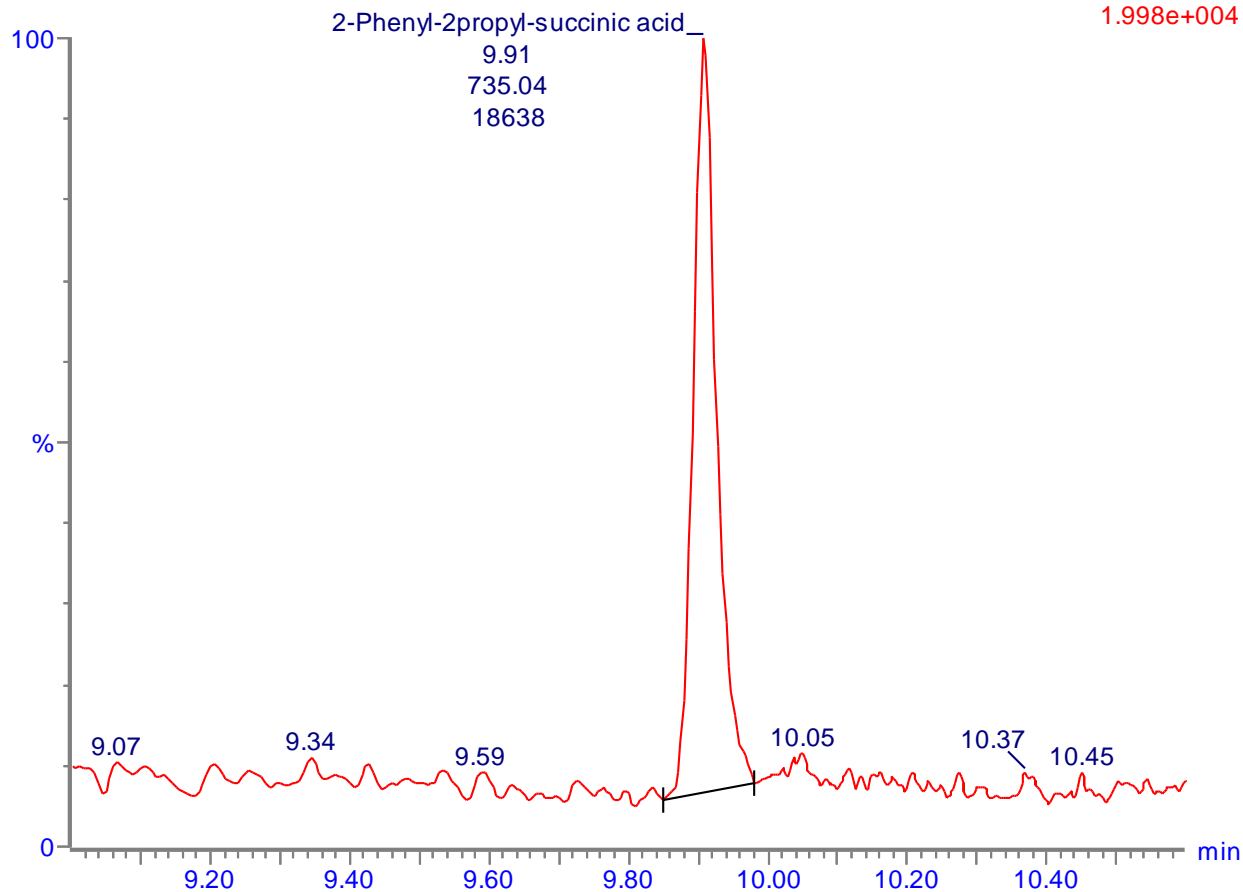

### Supplementary Figure S3. Standard curve of selected carboxylic acids

Compound name: Glyceric acid

Correlation coefficient:  $r = 0.998642$ ,  $r^2 = 0.997286$

Calibration curve:  $0.00512451 * x + 0.177688$

Response type: Internal Std ( Ref 2 ), Area \* ( IS Conc. / IS Area )

Curve type: Linear, Origin: Exclude, Weighting: 1/x, Axis trans: None

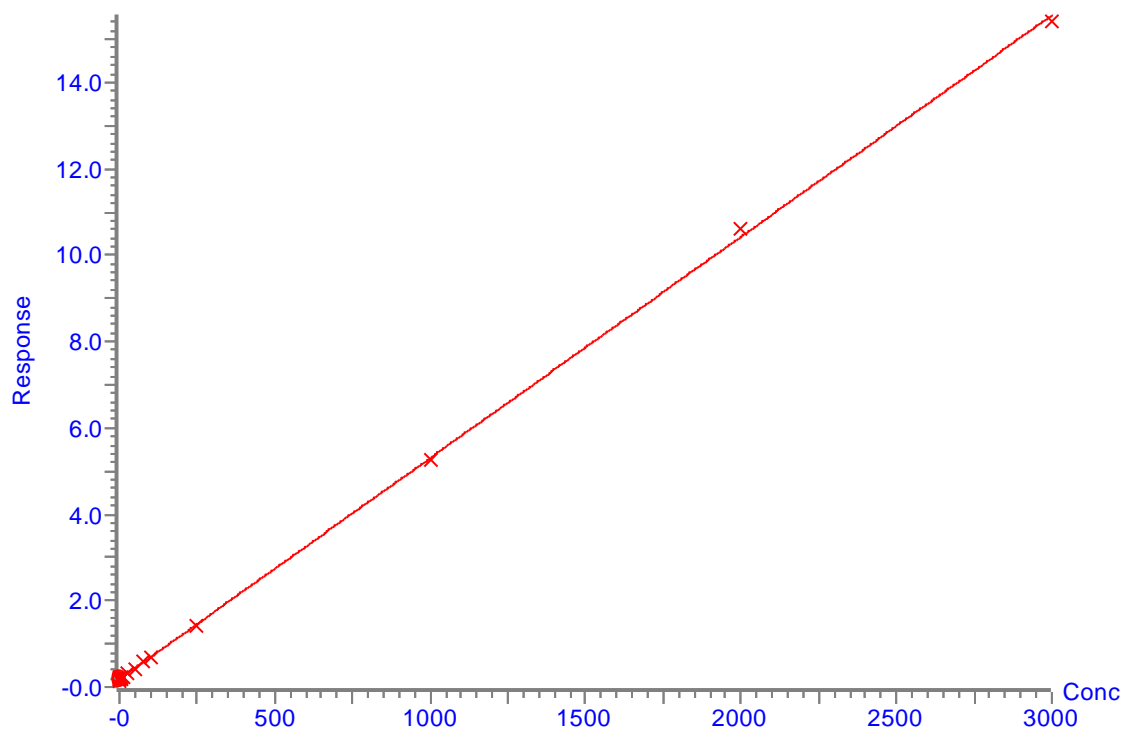

| Glyceric acid |                  |          |        |      |          |
|---------------|------------------|----------|--------|------|----------|
|               | Std Conc (ng/mL) | Response | Conc.  | %Dev | S/N      |
| 1             | 2.5              | 0.191    | 2.6    | 5.5  | 2189.101 |
| 2             | 5                | 0.203    | 5      | 0.2  | 1896.329 |
| 3             | 7.5              | 0.215    | 7.3    | -2.3 | 2614.522 |
| 4             | 10               | 0.23     | 10.2   | 2    | 1392.784 |
| 5             | 25               | 0.309    | 25.7   | 2.7  | 3452.051 |
| 6             | 50               | 0.429    | 49.1   | -1.8 | 2412.603 |
| 7             | 75               | 0.573    | 77.2   | 2.9  | 4630.4   |
| 8             | 100              | 0.678    | 97.6   | -2.4 | 3252.067 |
| 9             | 250              | 1.431    | 244.6  | -2.1 | 6490.712 |
| 10            | 1000             | 5.265    | 992.8  | -0.7 | 2256.179 |
| 11            | 2000             | 10.615   | 2036.7 | 1.8  | 3613.909 |



|    |      |        |      |      |          |
|----|------|--------|------|------|----------|
| 12 | 3000 | 15.408 | 2972 | -0.9 | 6370.232 |
|----|------|--------|------|------|----------|

Compound name: Glyoxalic acid\_1

Coefficient of Determination:  $R^2 = 0.998949$

Calibration curve:  $4.88297e-010 * x^2 + 0.000124527 * x + 9.31703e-005$

Response type: Internal Std ( Ref 2 ), Area \* ( IS Conc. / IS Area )

Curve type: 2nd Order, Origin: Exclude, Weighting: 1/x, Axis trans: None

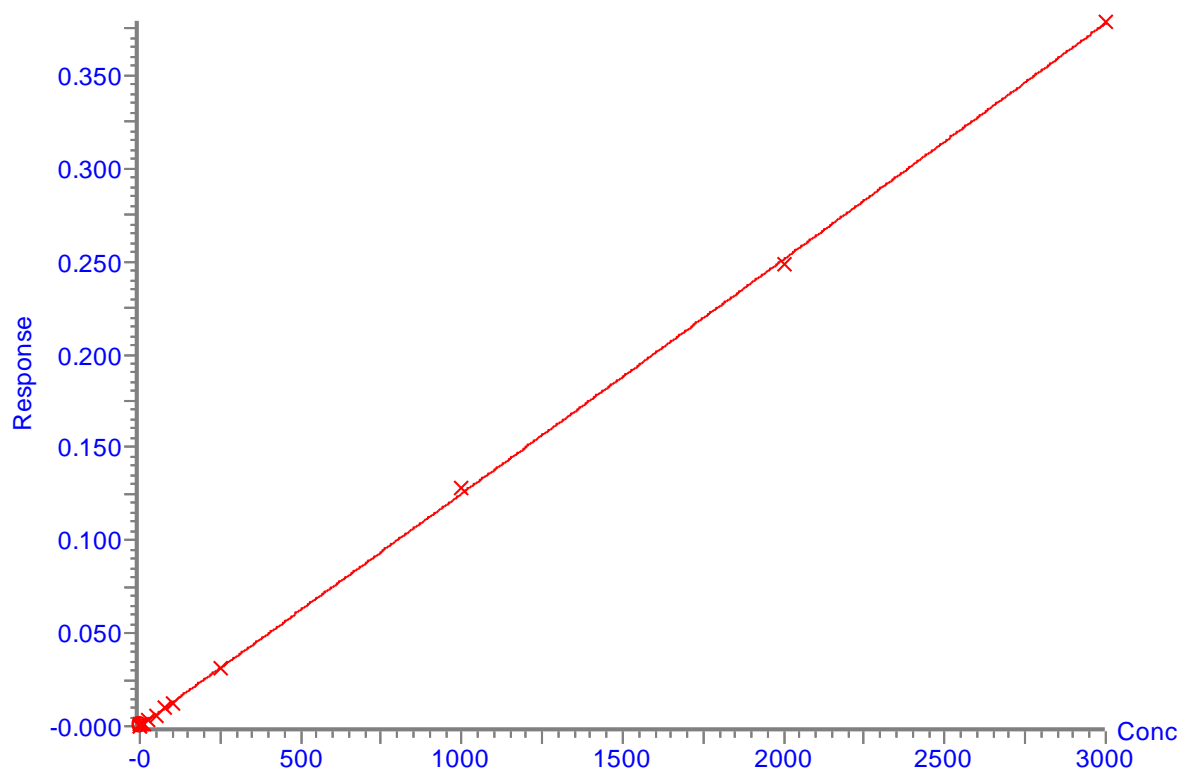

| Glyoxalic acid |                  |          |        |      |         |
|----------------|------------------|----------|--------|------|---------|
|                | Std Conc (ng/mL) | Response | Conc.  | %Dev | S/N     |
| 1              | 5                | 0.001    | 5.4    | 7.9  | 49.695  |
| 2              | 7.5              | 0.001    | 7.4    | -1.7 | 10.554  |
| 3              | 10               | 0.002    | 11.6   | 15.6 | 9.341   |
| 4              | 25               | 0.003    | 23.6   | -5.8 | 16.438  |
| 5              | 50               | 0.006    | 47.8   | -4.3 | 69.854  |
| 6              | 75               | 0.01     | 75.6   | 0.8  | 52.901  |
| 7              | 100              | 0.012    | 94.5   | -5.5 | 72.647  |
| 8              | 250              | 0.031    | 246.9  | -1.2 | 79.599  |
| 9              | 1000             | 0.129    | 1028.1 | 2.8  | 133.726 |
| 10             | 2000             | 0.248    | 1977.7 | -1.1 | 221.925 |
| 11             | 3000             | 0.379    | 3006   | 0.2  | 196.583 |

Compound name: Propionic acid

Correlation coefficient:  $r = 0.999070$ ,  $r^2 = 0.998140$

Calibration curve:  $0.00592889 * x + 0.0184697$

Response type: Internal Std ( Ref 2 ), Area \* ( IS Conc. / IS Area )

Curve type: Linear, Origin: Exclude, Weighting: 1/x, Axis trans: None

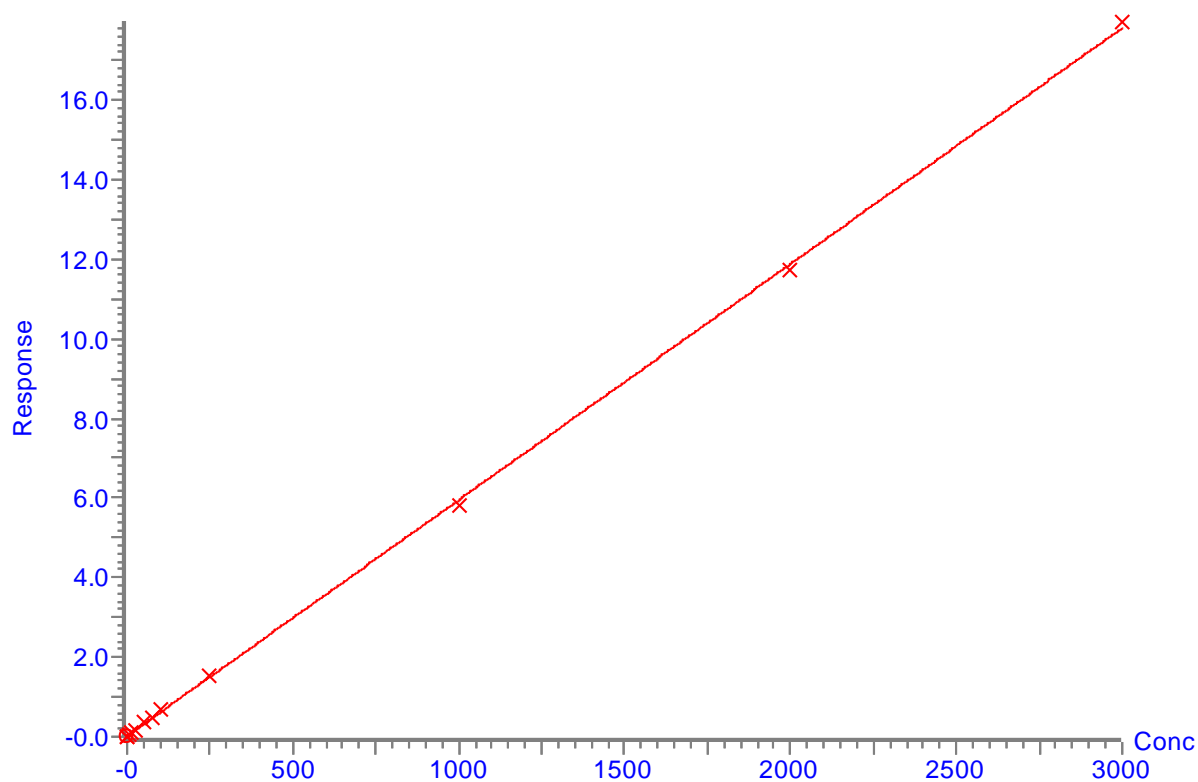

| Propionic acid |                  |          |        |      |          |
|----------------|------------------|----------|--------|------|----------|
|                | Std Conc (ng/mL) | Response | Conc.  | %Dev | S/N      |
| 1              | 5                | 0.05     | 5.3    | 5.4  | 97.87    |
| 2              | 7.5              | 0.064    | 7.7    | 3    | 226.611  |
| 3              | 10               | 0.087    | 11.6   | 15.8 | 139.49   |
| 4              | 25               | 0.165    | 24.6   | -1.4 | 202.447  |
| 5              | 50               | 0.346    | 55.3   | 10.6 | 769.14   |
| 6              | 75               | 0.468    | 75.9   | 1.1  | 460.501  |
| 7              | 100              | 0.706    | 116    | 16   | 495.198  |
| 8              | 250              | 1.508    | 251.2  | 0.5  | 618.883  |
| 9              | 1000             | 5.832    | 980.5  | -1.9 | 1632.454 |
| 10             | 2000             | 11.717   | 1973.2 | -1.3 | 2998.916 |

Compound name: Pyruvic acid\_179

Correlation coefficient:  $r = 0.999830$ ,  $r^2 = 0.999661$

Calibration curve:  $0.00892922 * x + 1.12112$

Response type: Internal Std ( Ref 2 ), Area \* ( IS Conc. / IS Area )

Curve type: Linear, Origin: Exclude, Weighting: 1/x, Axis trans: None

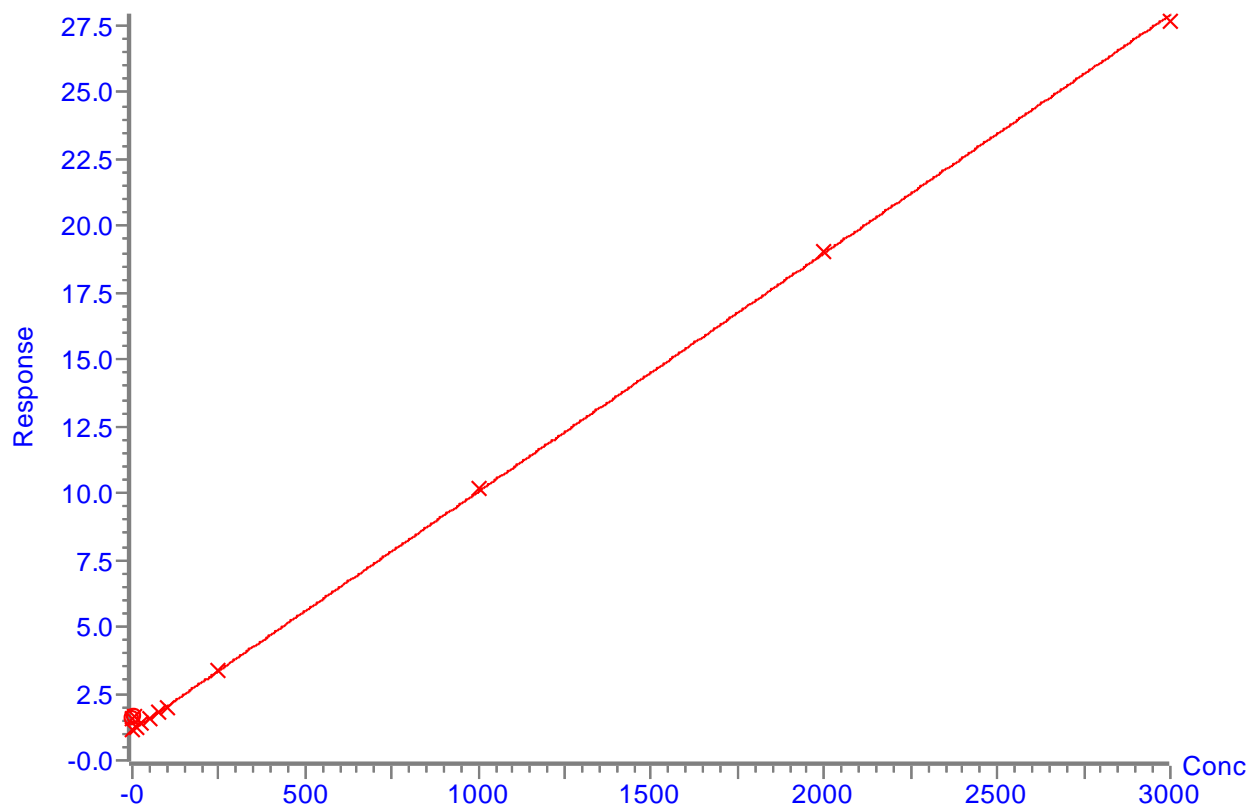

| Pyruvic acid |                  |          |        |      |          |
|--------------|------------------|----------|--------|------|----------|
|              | Std Conc (ng/mL) | Response | Conc.  | %Dev | S/N      |
| 1            | 10               | 1.235    | 12.8   | 28   | 826.63   |
| 2            | 25               | 1.368    | 27.7   | 10.7 | 2553.92  |
| 3            | 50               | 1.596    | 53.2   | 6.3  | 3007.967 |
| 4            | 75               | 1.791    | 75.1   | 0.1  | 7938.929 |
| 5            | 100              | 2.007    | 99.2   | -0.8 | 2185.92  |
| 6            | 250              | 3.366    | 251.4  | 0.6  | 8542.873 |
| 7            | 1000             | 10.152   | 1011.4 | 1.1  | 7546.01  |
| 8            | 2000             | 19.029   | 2005.5 | 0.3  | 10478.77 |
| 9            | 3000             | 27.685   | 2975   | -0.8 | 7560.999 |

Compound name: Alanine

Correlation coefficient:  $r = 0.999164$ ,  $r^2 = 0.998328$

Calibration curve:  $0.000776941 \cdot x + 0.0917322$

Response type: Internal Std ( Ref 2 ), Area \* ( IS Conc. / IS Area )

Curve type: Linear, Origin: Exclude, Weighting: 1/x, Axis trans: None

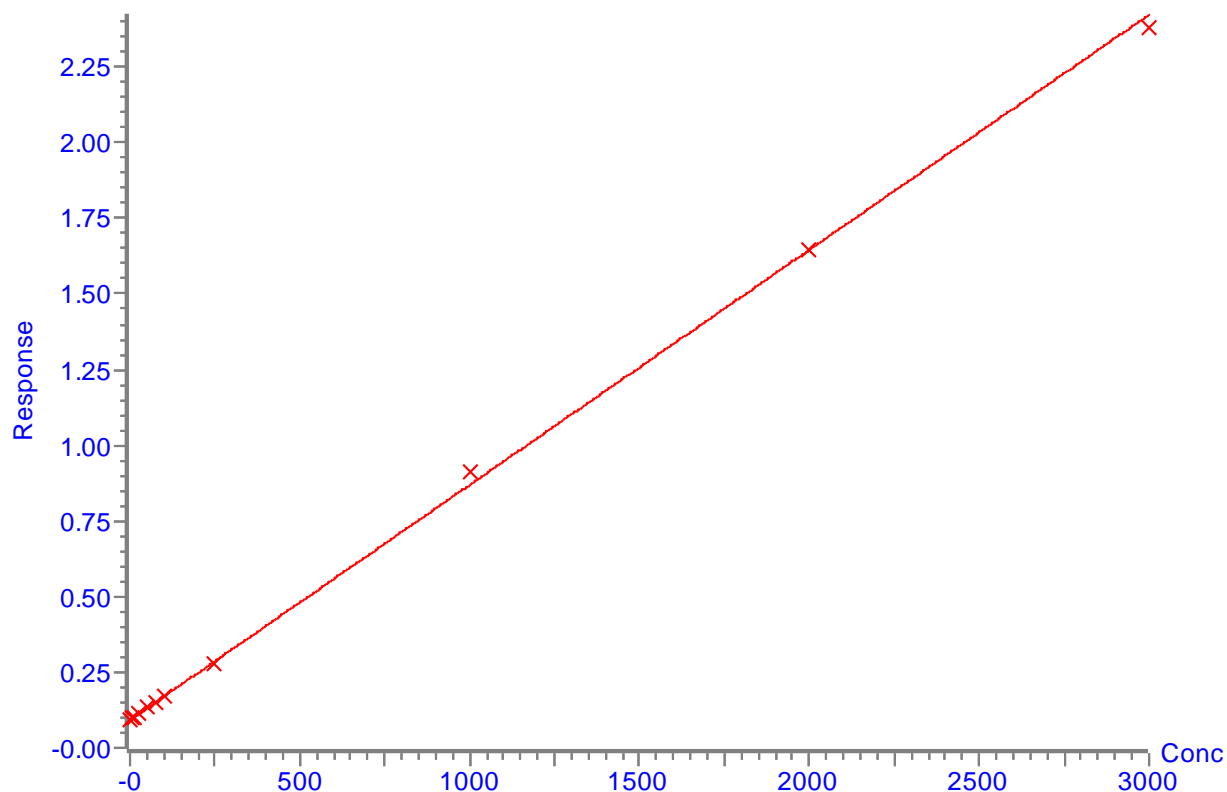

| Alanine |                  |          |        |      |          |
|---------|------------------|----------|--------|------|----------|
|         | Std Conc (ng/mL) | Response | Conc.  | %Dev | S/N      |
| 1       | 5                | 0.096    | 5.9    | 18.2 | 750.615  |
| 2       | 7.5              | 0.097    | 7.4    | -1.1 | 592.909  |
| 3       | 10               | 0.101    | 11.6   | 15.8 | 246.039  |
| 4       | 25               | 0.114    | 29     | 16   | 285.662  |
| 5       | 50               | 0.135    | 55.6   | 11.2 | 361.211  |
| 6       | 75               | 0.151    | 76.6   | 2.1  | 504.953  |
| 7       | 100              | 0.167    | 97.5   | -2.5 | 339.665  |
| 8       | 250              | 0.279    | 241.1  | -3.5 | 469.805  |
| 9       | 1000             | 0.915    | 1059.8 | 6    | 1901.629 |
| 10      | 2000             | 1.642    | 1995.9 | -0.2 | 1245.058 |
| 11      | 3000             | 2.377    | 2941.4 | -2   | 484.933  |

Compound name: 2-oxo-butyrac acid

Correlation coefficient:  $r = 0.996540$ ,  $r^2 = 0.993091$

Calibration curve:  $0.00241346 * x + 0.0534511$

Response type: Internal Std ( Ref 2 ), Area \* ( IS Conc. / IS Area )

Curve type: Linear, Origin: Exclude, Weighting: 1/x, Axis trans: None

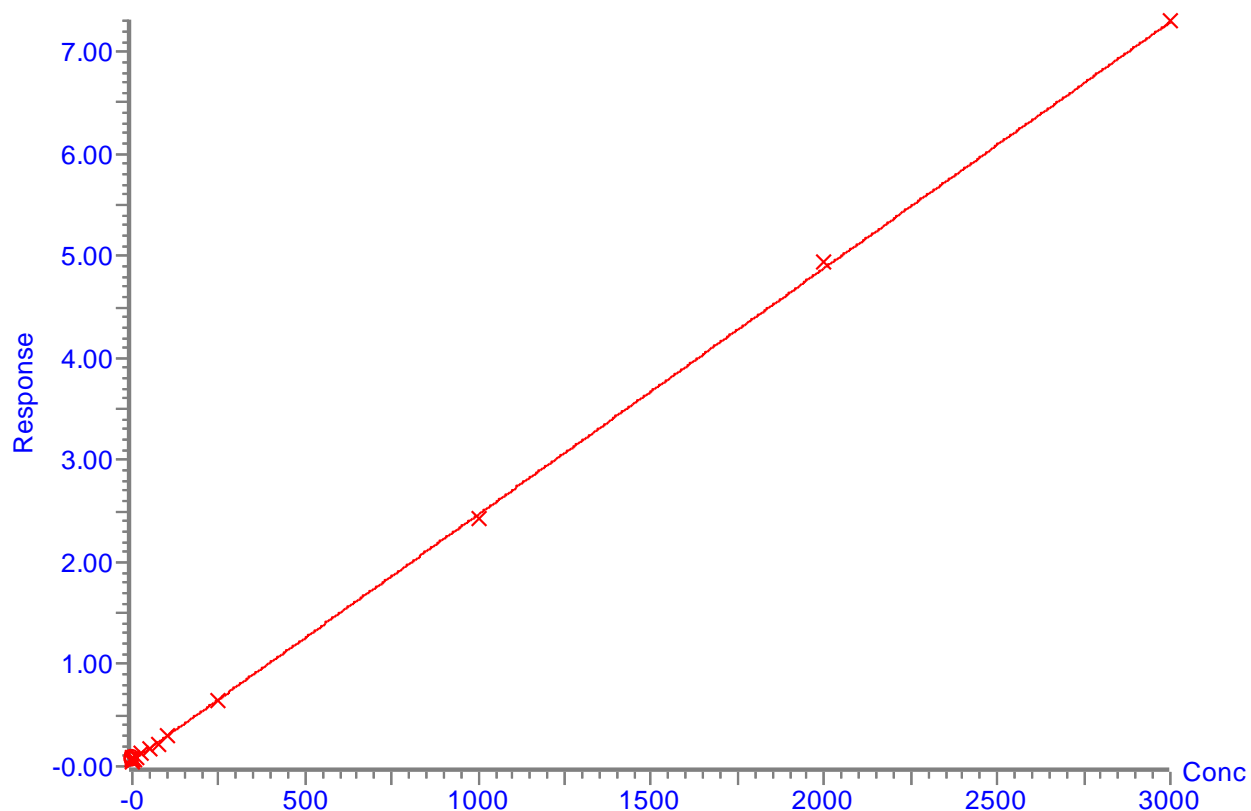

| 2-oxo-butyrac acid |                  |          |        |      |          |
|--------------------|------------------|----------|--------|------|----------|
|                    | Std Conc (ng/mL) | Response | Conc.  | %Dev | S/N      |
| 1                  | 2.5              | 0.06     | 2.7    | 7.6  | 146.685  |
| 2                  | 5                | 0.066    | 5.1    | 2.4  | 220.804  |
| 3                  | 7.5              | 0.07     | 6.9    | -8.2 | 152.087  |
| 4                  | 10               | 0.082    | 11.8   | 17.7 | 237.307  |
| 5                  | 50               | 0.172    | 49.2   | -1.5 | 306.963  |
| 6                  | 75               | 0.22     | 69     | -8   | 308.994  |
| 7                  | 100              | 0.296    | 100.3  | 0.3  | 422.116  |
| 8                  | 250              | 0.636    | 241.5  | -3.4 | 580.161  |
| 9                  | 1000             | 2.429    | 984.3  | -1.6 | 1786.738 |
| 10                 | 2000             | 4.939    | 2024.3 | 1.2  | 1054.447 |
| 11                 | 3000             | 7.305    | 3004.7 | 0.2  | 753.71   |

Compound name: Malonic acid\_152

Correlation coefficient:  $r = 0.999713$ ,  $r^2 = 0.999426$

Calibration curve:  $0.000576929 \cdot x + 0.0834816$

Response type: Internal Std ( Ref 2 ), Area \* ( IS Conc. / IS Area )

Curve type: Linear, Origin: Exclude, Weighting: 1/x, Axis trans: None

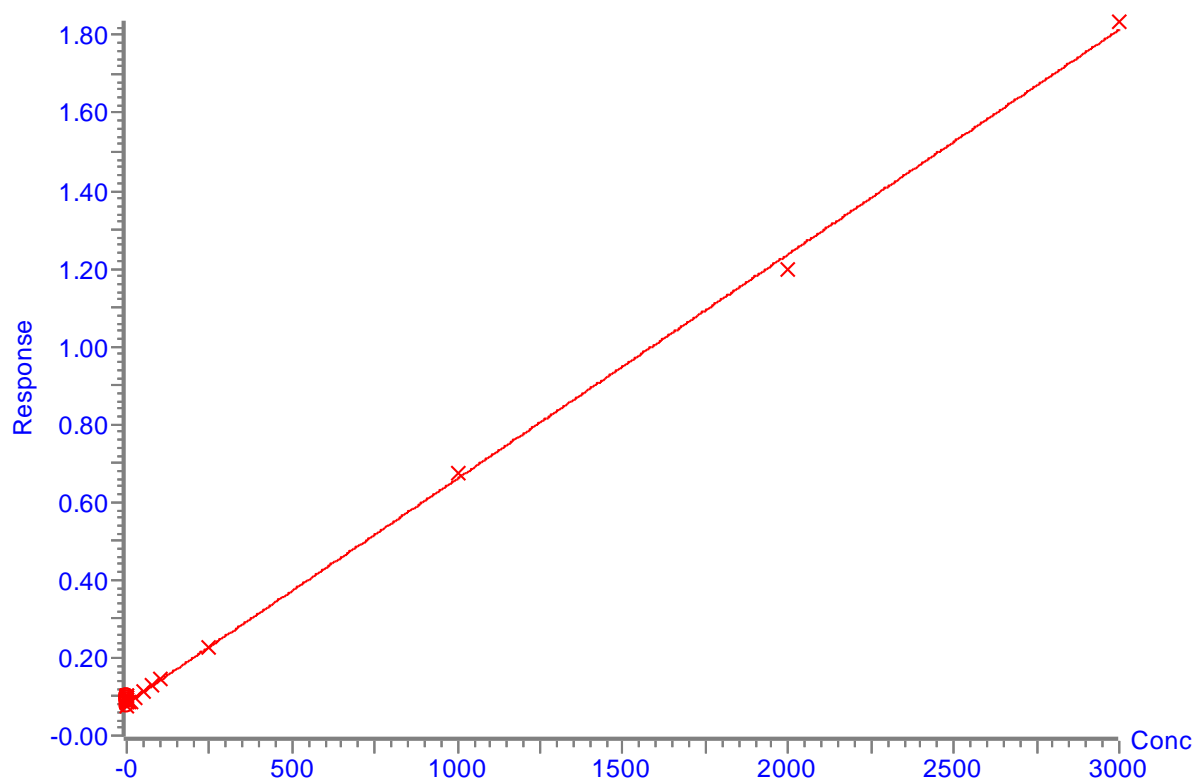

| Malonic acid |                  |          |        |       |          |
|--------------|------------------|----------|--------|-------|----------|
|              | Std Conc (ng/mL) | Response | Conc.  | %Dev  | S/N      |
| 1            | 1                | 0.084    | 1.1    | 8.8   | 372.092  |
| 2            | 2.5              | 0.085    | 2.2    | -13.4 | 257.139  |
| 3            | 5                | 0.086    | 5.1    | 2.4   | 563.668  |
| 4            | 7.5              | 0.088    | 7.2    | -4.6  | 527.207  |
| 5            | 10               | 0.089    | 9.4    | -6.5  | 290.84   |
| 6            | 25               | 0.099    | 26.9   | 7.5   | 837.124  |
| 7            | 50               | 0.111    | 48     | -4    | 377.3    |
| 8            | 75               | 0.129    | 78.4   | 4.6   | 581.593  |
| 9            | 100              | 0.144    | 104.2  | 4.2   | 276.342  |
| 10           | 250              | 0.229    | 252.3  | 0.9   | 445.655  |
| 11           | 1000             | 0.673    | 1021.3 | 2.1   | 622.213  |
| 12           | 2000             | 1.2      | 1934.6 | -3.3  | 1279.919 |
| 13           | 3000             | 1.835    | 3035.4 | 1.2   | 1215.216 |

Compound name: Serine

Correlation coefficient:  $r = 0.999286$ ,  $r^2 = 0.998573$

Calibration curve:  $8.93123 \times 10^{-5} \cdot x + 0.0170367$

Response type: Internal Std ( Ref 2 ), Area \* ( IS Conc. / IS Area )

Curve type: Linear, Origin: Exclude, Weighting: 1/x, Axis trans: None

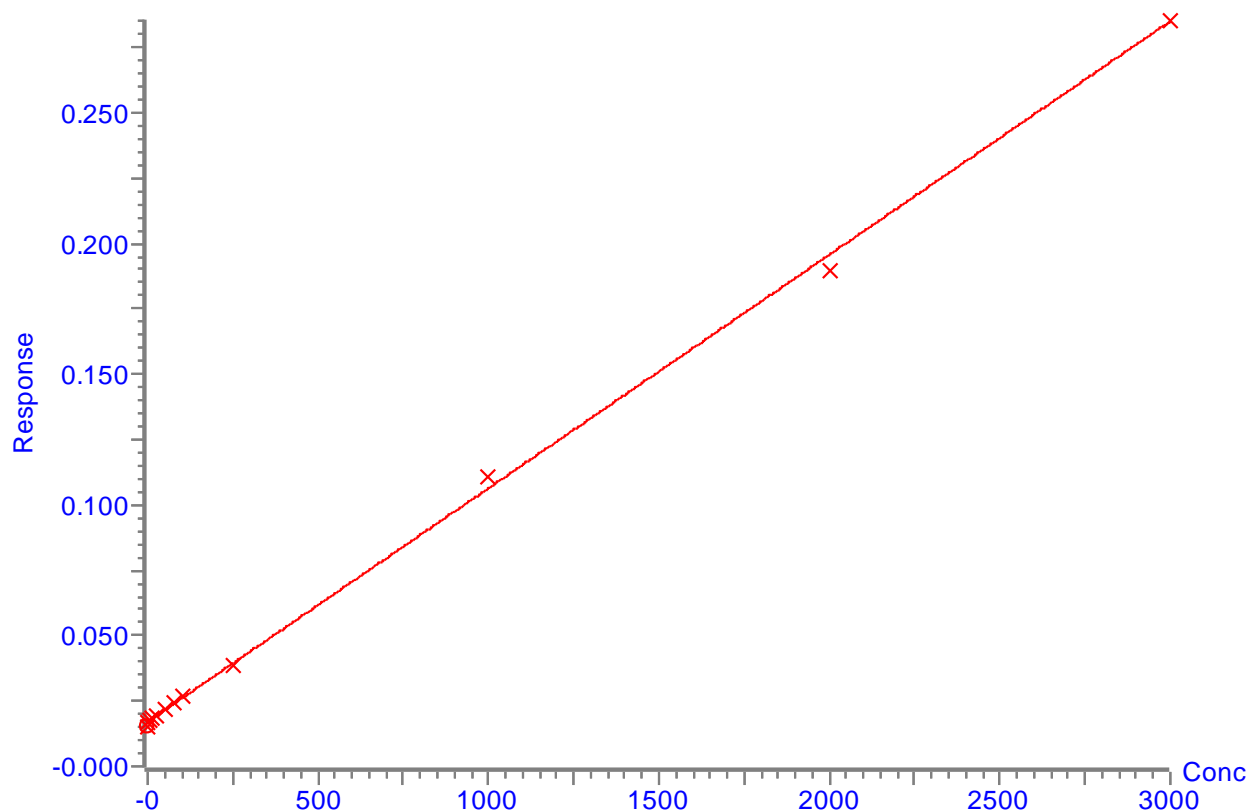

| Serine |                  |          |        |      |         |
|--------|------------------|----------|--------|------|---------|
|        | Std Conc (ng/mL) | Response | Conc.  | %Dev | S/N     |
| 1      | 5                | 0.018    | 5.7    | 14.1 | 89.795  |
| 2      | 10               | 0.018    | 11.4   | 13.8 | 71.837  |
| 3      | 25               | 0.019    | 24     | -3.9 | 99.64   |
| 4      | 50               | 0.022    | 57     | 14.1 | 124.253 |
| 5      | 75               | 0.024    | 77.2   | 2.9  | 84.875  |
| 6      | 100              | 0.027    | 106    | 6    | 100.234 |
| 7      | 250              | 0.039    | 245.9  | -1.6 | 88.719  |
| 8      | 1000             | 0.111    | 1052   | 5.2  | 175.052 |
| 9      | 2000             | 0.19     | 1933   | -3.4 | 299.31  |
| 10     | 3000             | 0.285    | 3002.3 | 0.1  | 127.662 |

Compound name: 4-Me-2-oxo-pentanoic acid  
 Correlation coefficient:  $r = 0.998025$ ,  $r^2 = 0.996054$   
 Calibration curve:  $2.44122 \cdot x + -12.8998$   
 Response type: Internal Std ( Ref 9 ), Area \* ( IS Conc. / IS Area )  
 Curve type: Linear, Origin: Exclude, Weighting: 1/x, Axis trans: None

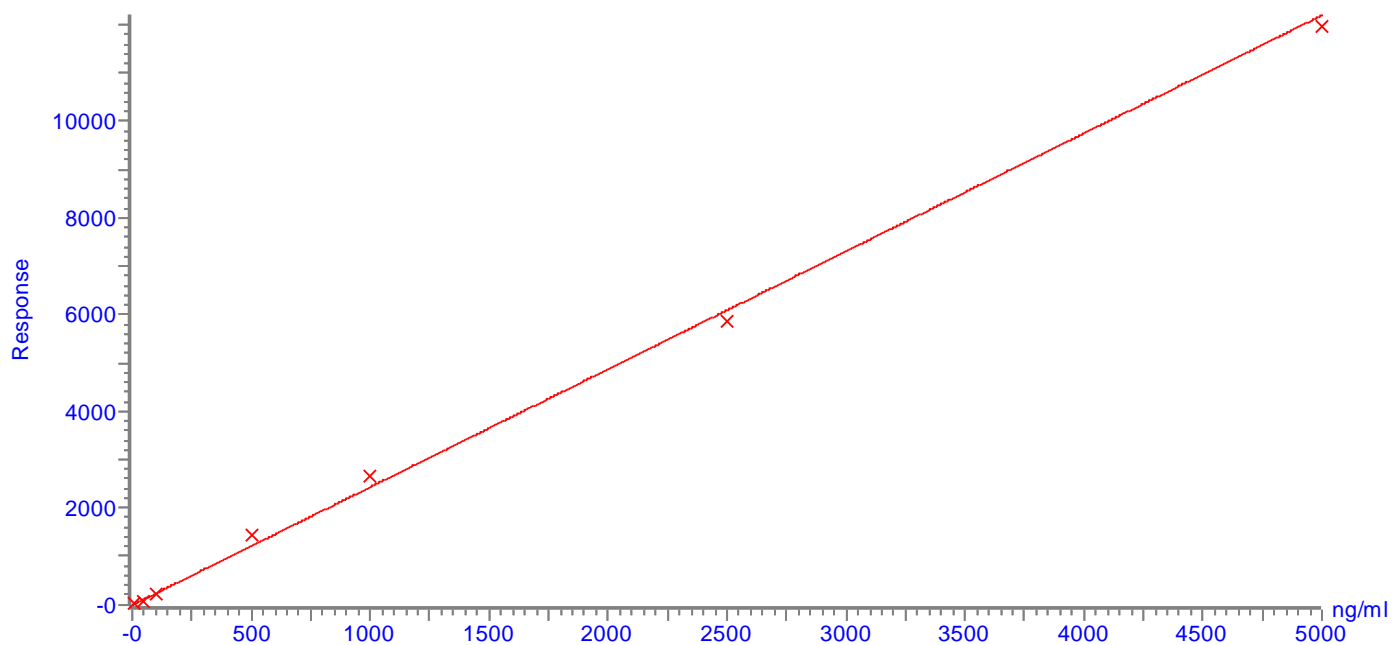

| 4-methyl-2-oxo-pentanoic acid |                  |             |         |       |          |
|-------------------------------|------------------|-------------|---------|-------|----------|
|                               | Std Conc (ng/mL) | Response    | Conc.   | %Dev  | S/N      |
| 1                             | 10               | 11.661132   | 10.06   | 0.6   | 1106.915 |
| 2                             | 50               | 81.006854   | 38.47   | -23.1 | 2285.011 |
| 3                             | 100              | 229.312603  | 99.22   | -0.8  | 3319.217 |
| 4                             | 500              | 1437.893426 | 594.29  | 18.9  | 2101.931 |
| 5                             | 1000             | 2666.831949 | 1097.70 | 9.8   | 4439.94  |
| 6                             | 2500             | 5870.959997 | 2410.22 | -3.6  | 5385.672 |
| 7                             | 5000             | 11973.56943 | 4910.04 | -1.8  | 6600.557 |



Compound name: Fumaric acid  
 Correlation coefficient:  $r = 0.999419$ ,  $r^2 = 0.998838$   
 Calibration curve:  $13.2882 * x + -139.601$   
 Response type: Internal Std ( Ref 9 ), Area \* ( IS Conc. / IS Area )  
 Curve type: Linear, Origin: Exclude, Weighting: 1/x, Axis trans: None

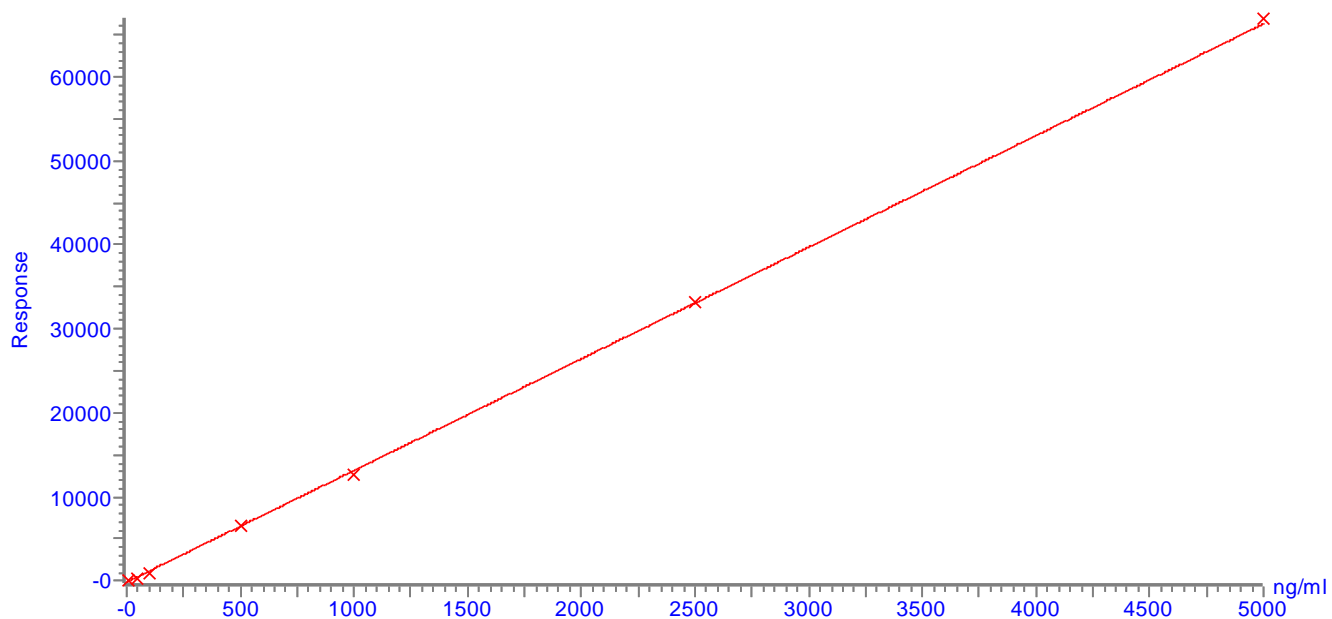

| Fumaric acid |                     |             |         |       |     |
|--------------|---------------------|-------------|---------|-------|-----|
|              | Std Conc<br>(ng/mL) | Response    | Conc.   | %Dev  | S/N |
| 1            | 10                  | 51.952646   | 14.42   | 44.2  |     |
| 2            | 50                  | 349.524635  | 36.81   | -26.4 |     |
| 3            | 100                 | 977.47907   | 84.07   | -15.9 |     |
| 4            | 500                 | 6553.966778 | 503.72  | 0.7   |     |
| 5            | 1000                | 12601.05991 | 958.80  | -4.1  |     |
| 6            | 2500                | 33276.54234 | 2514.73 | 0.6   |     |
| 7            | 5000                | 66932.05177 | 5047.46 | 0.9   |     |

Compound name: Maleic acid  
 Correlation coefficient:  $r = 0.997995$ ,  $r^2 = 0.995994$   
 Calibration curve:  $30.0176 * x + -334.853$   
 Response type: Internal Std ( Ref 9 ), Area \* ( IS Conc. / IS Area )  
 Curve type: Linear, Origin: Exclude, Weighting: 1/x, Axis trans: None

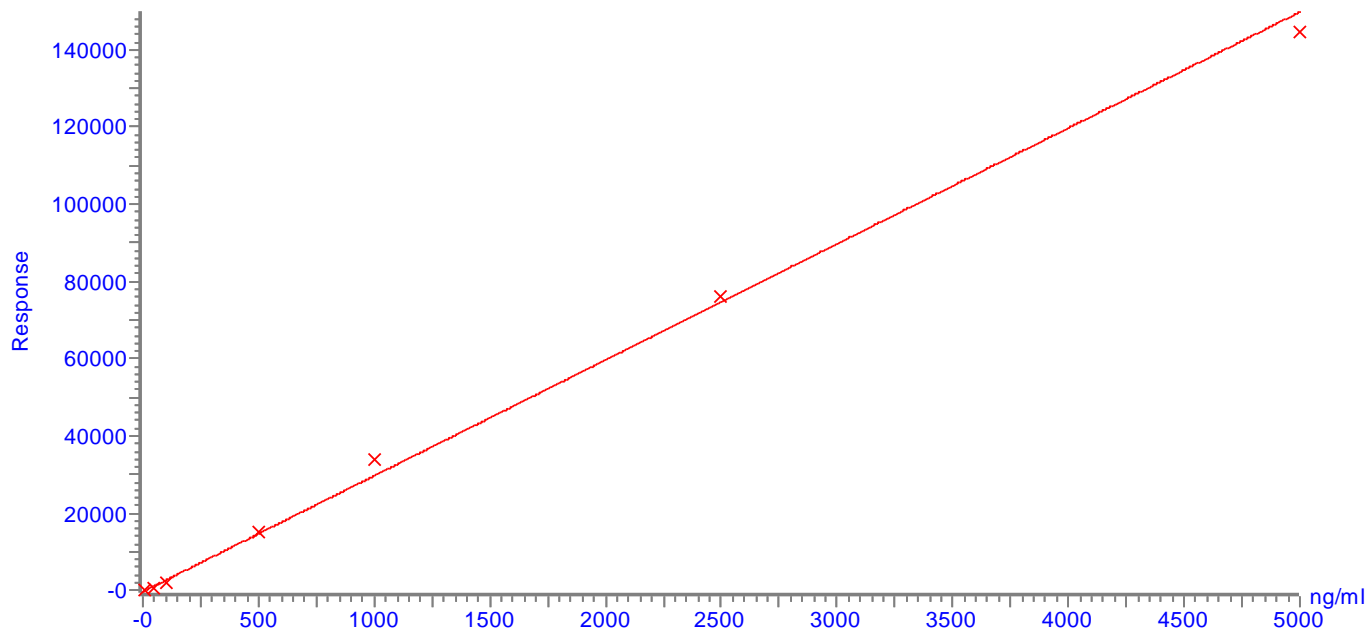

| Maleic acid |                  |             |         |       |           |
|-------------|------------------|-------------|---------|-------|-----------|
|             | Std Conc (ng/mL) | Response    | Conc.   | %Dev  | S/N       |
| 1           | 10               | 64.602489   | 13.31   | 33.1  | 7415.358  |
| 2           | 50               | 724.591949  | 35.29   | -29.4 | 10348.629 |
| 3           | 100              | 2064.030258 | 79.92   | -20.1 | 12235.669 |
| 4           | 500              | 15358.13931 | 522.79  | 4.6   | 16886.924 |
| 5           | 1000             | 33723.81409 | 1134.62 | 13.5  | 24748.384 |
| 6           | 2500             | 76089.10544 | 2545.97 | 1.8   | 34871.894 |
| 7           | 5000             | 144592.6513 | 4828.09 | -3.4  | 5480.32   |

Compound name: Valine

Correlation coefficient:  $r = 0.998404$ ,  $r^2 = 0.996812$

Calibration curve:  $0.00438182 * x + 0.00765242$

Response type: Internal Std ( Ref 2 ), Area \* ( IS Conc. / IS Area )

Curve type: Linear, Origin: Exclude, Weighting:  $1/x$ , Axis trans: None

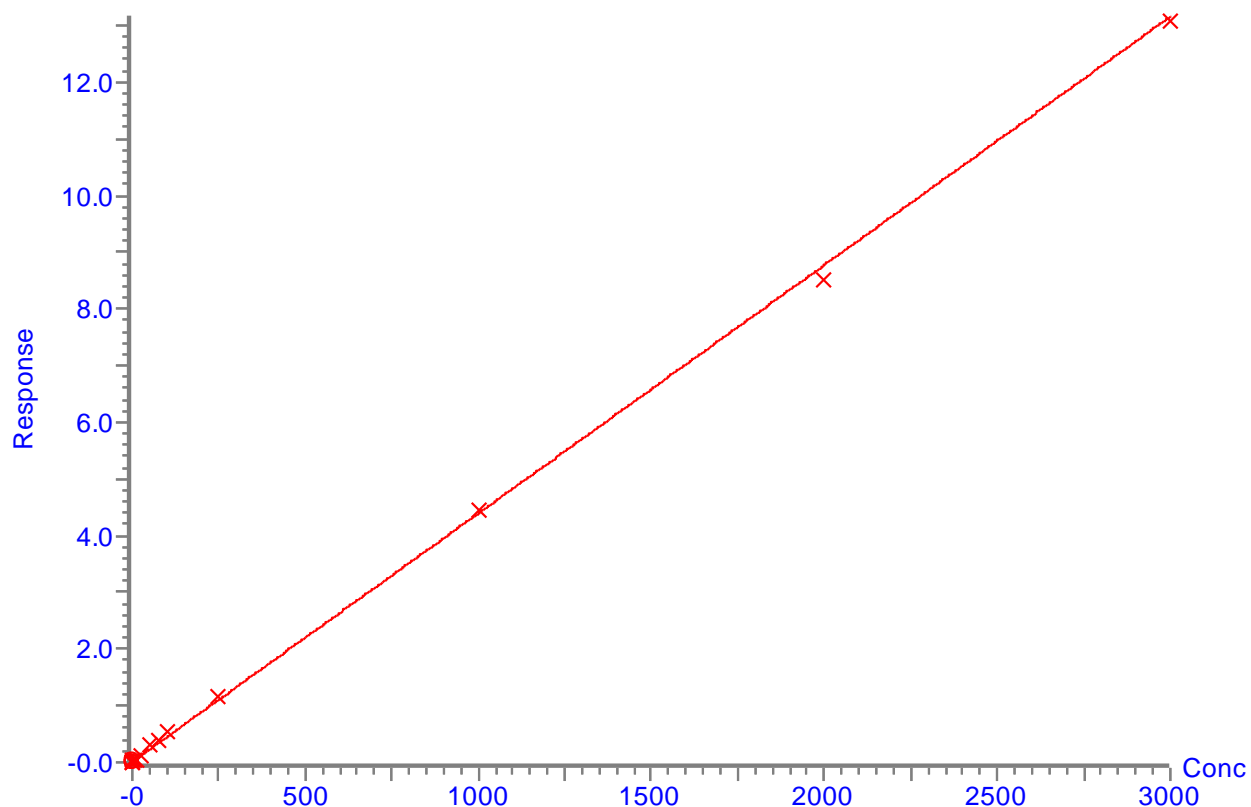

| Valine |                  |          |        |       |         |
|--------|------------------|----------|--------|-------|---------|
|        | Std Conc (ng/mL) | Response | Conc.  | %Dev  | S/N     |
| 1      | 5                | 0.097    | 5.9    | 17.7  | 342.11  |
| 2      | 7.5              | 0.098    | 7      | -7.1  | 391.381 |
| 3      | 10               | 0.1      | 9.6    | -4.2  | 401.245 |
| 4      | 25               | 0.113    | 23.2   | -7    | 324.818 |
| 5      | 50               | 0.14     | 54.7   | 9.4   | 549.304 |
| 6      | 75               | 0.164    | 81.4   | 8.5   | 490.369 |
| 7      | 100              | 0.178    | 96.8   | -3.2  | 415.159 |
| 8      | 250              | 0.277    | 209.7  | -16.1 | 398.88  |
| 9      | 1000             | 0.986    | 1011.4 | 1.1   | 942.359 |
| 10     | 2000             | 1.868    | 2009   | 0.5   | 793.978 |
| 11     | 3000             | 2.756    | 3013.9 | 0.5   | 1046.82 |

Compound name: Succinic acid

Correlation coefficient:  $r = 0.999769$ ,  $r^2 = 0.999538$

Calibration curve:  $0.000779028 * x + 0.0205476$

Response type: Internal Std ( Ref 2 ), Area \* ( IS Conc. / IS Area )

Curve type: Linear, Origin: Exclude, Weighting:  $1/x$ , Axis trans: None

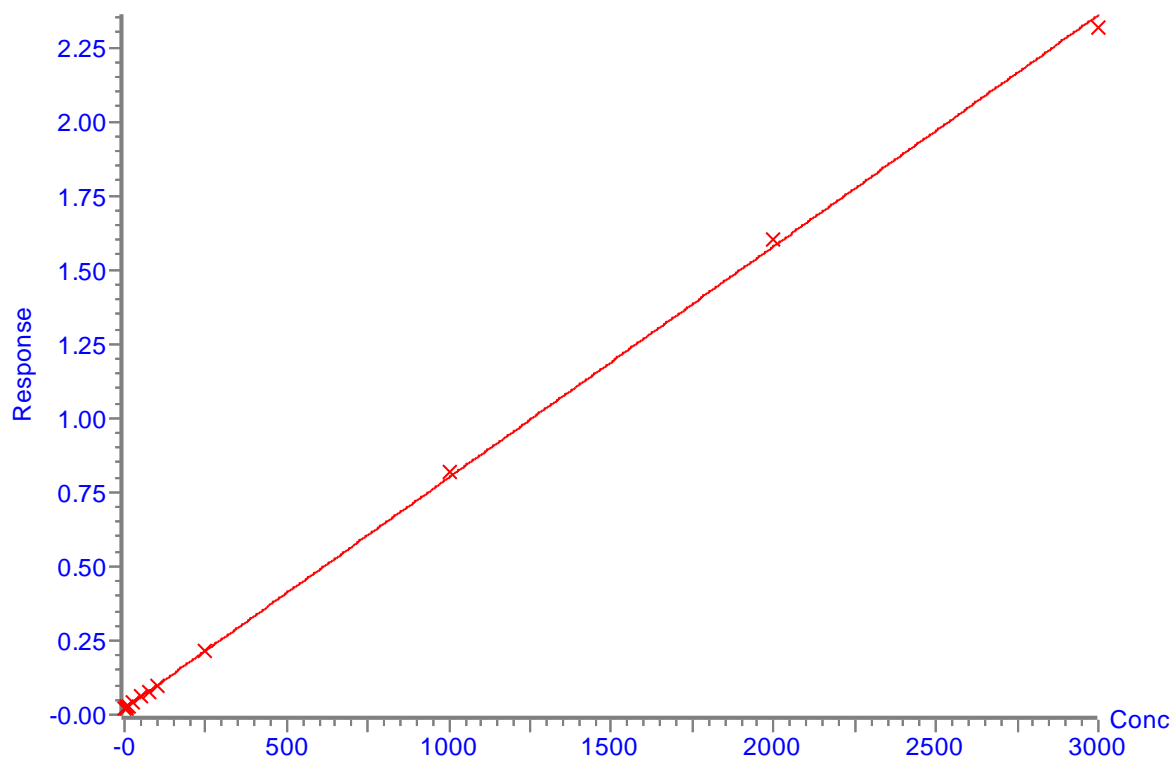

| Succinic acid |                  |          |        |       |         |
|---------------|------------------|----------|--------|-------|---------|
|               | Std Conc (ng/mL) | Response | Conc.  | %Dev  | S/N     |
| 1             | 1                | 0.021    | 1      | -0.8  | 105.902 |
| 2             | 2.5              | 0.022    | 2.2    | -13   | 24.337  |
| 3             | 5                | 0.024    | 4.4    | -12.8 | 59.842  |
| 4             | 7.5              | 0.027    | 7.8    | 3.4   | 31.761  |
| 5             | 10               | 0.03     | 11.6   | 15.6  | 40.139  |
| 6             | 25               | 0.041    | 26.7   | 6.9   | 42.057  |
| 7             | 50               | 0.063    | 54.2   | 8.4   | 110.749 |
| 8             | 75               | 0.075    | 70.2   | -6.4  | 203.725 |
| 9             | 100              | 0.097    | 97.7   | -2.3  | 116.438 |
| 10            | 250              | 0.213    | 247.6  | -1    | 260.912 |
| 11            | 1000             | 0.817    | 1022.3 | 2.2   | 554.023 |
| 12            | 2000             | 1.602    | 2029.8 | 1.5   | 319.115 |
| 13            | 3000             | 2.319    | 2950.7 | -1.6  | 402.72  |

Compound name: Ureidopropionic acid  
 Correlation coefficient:  $r = 0.999824$ ,  $r^2 = 0.999648$   
 Calibration curve:  $0.000281963 \cdot x + -0.000330475$   
 Response type: Internal Std ( Ref 2 ), Area \* ( IS Conc. / IS Area )  
 Curve type: Linear, Origin: Exclude, Weighting: 1/x, Axis trans: None

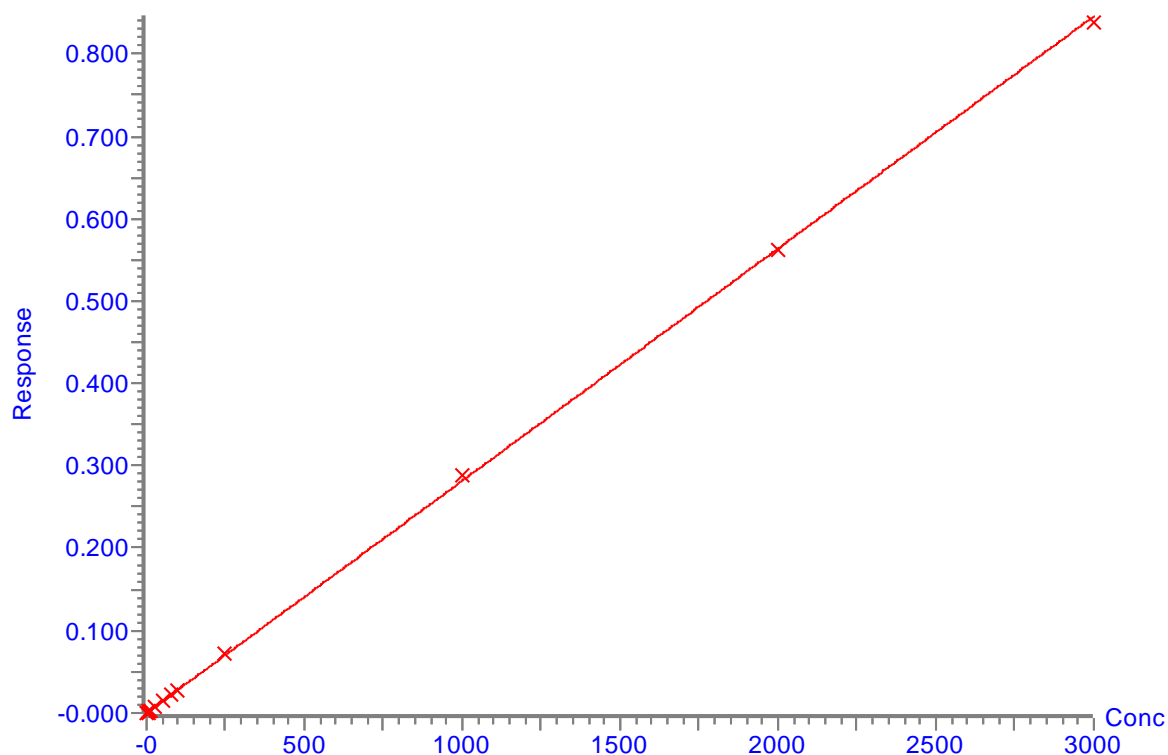

| Ureidopropionic acid |                  |          |        |       |          |
|----------------------|------------------|----------|--------|-------|----------|
|                      | Std Conc (ng/mL) | Response | Conc.  | %Dev  | S/N      |
| 1                    | 5                | 0.001    | 4.1    | -18.1 | 51.052   |
| 2                    | 7.5              | 0.002    | 7      | -6.3  | 67.003   |
| 3                    | 10               | 0.002    | 9.6    | -4    | 34.592   |
| 4                    | 25               | 0.007    | 24.3   | -2.6  | 113.066  |
| 5                    | 50               | 0.015    | 54.7   | 9.3   | 357.734  |
| 6                    | 75               | 0.022    | 78.1   | 4.1   | 481.159  |
| 7                    | 100              | 0.026    | 94.9   | -5.1  | 385.451  |
| 8                    | 250              | 0.072    | 256.8  | 2.7   | 1390.741 |
| 9                    | 1000             | 0.288    | 1024.4 | 2.4   | 3804.177 |
| 10                   | 2000             | 0.561    | 1990.8 | -0.5  | 3057.401 |
| 11                   | 3000             | 0.839    | 2977.9 | -0.7  | 2793.254 |

Compound name: Oxaloacetic acid

Correlation coefficient:  $r = 0.999627$ ,  $r^2 = 0.999254$

Calibration curve:  $5.70966e-005 * x + 0.0012498$

Response type: Internal Std ( Ref 2 ), Area \* ( IS Conc. / IS Area )

Curve type: Linear, Origin: Exclude, Weighting: 1/x, Axis trans: None

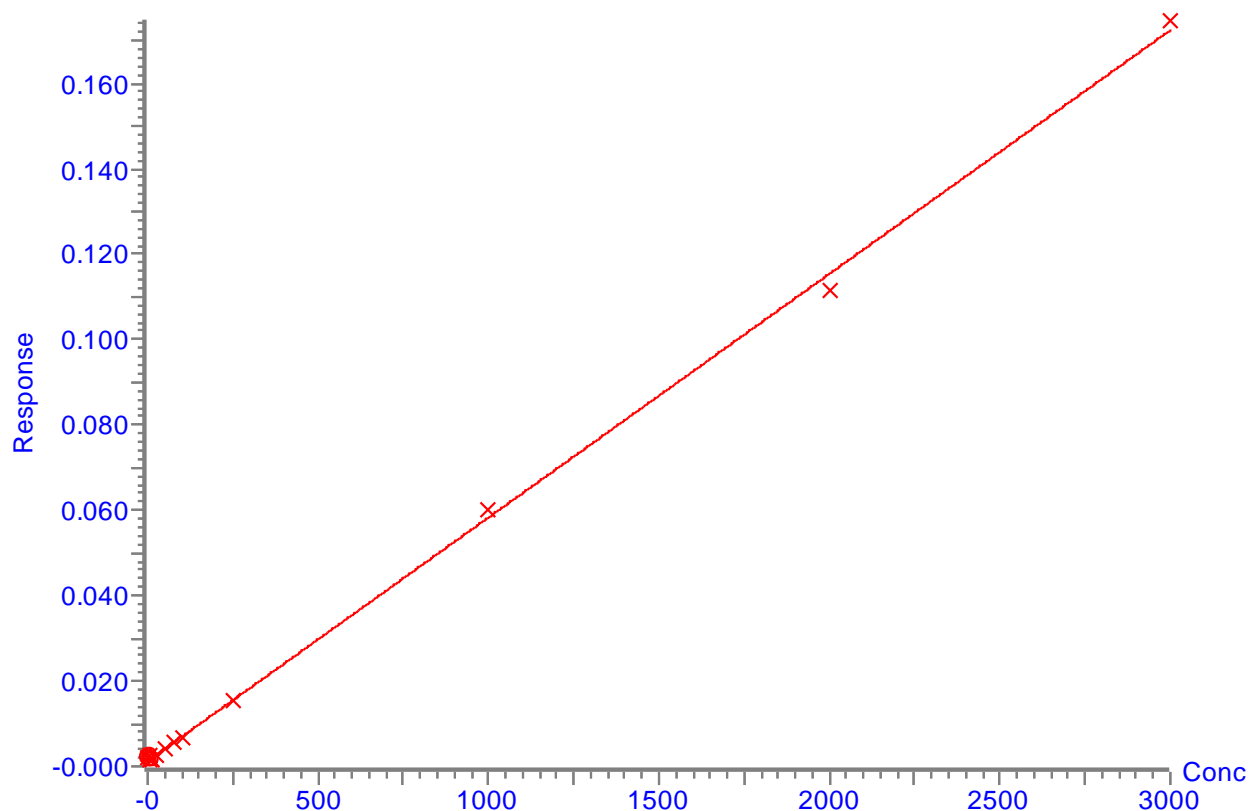

| Oxaloacetic acid |                  |          |        |      |         |
|------------------|------------------|----------|--------|------|---------|
|                  | Std Conc (ng/mL) | Response | Conc.  | %Dev | S/N     |
| 1                | 50               | 0.004    | 47.5   | -4.9 | 13.59   |
| 2                | 75               | 0.006    | 76.1   | 1.5  | 15.99   |
| 3                | 100              | 0.007    | 98.4   | -1.6 | 15.839  |
| 4                | 250              | 0.015    | 248.3  | -0.7 | 39.467  |
| 5                | 1000             | 0.06     | 1035.1 | 3.5  | 181.353 |
| 6                | 2000             | 0.111    | 1930.9 | -3.5 | 231.574 |
| 7                | 3000             | 0.175    | 3037.6 | 1.3  | 157.504 |

Compound name: Aspartic acid

Correlation coefficient:  $r = 0.999638$ ,  $r^2 = 0.999276$

Calibration curve:  $0.0029226 * x + 0.007553$

Response type: Internal Std ( Ref 2 ), Area \* ( IS Conc. / IS Area )

Curve type: Linear, Origin: Exclude, Weighting: 1/x, Axis trans: None

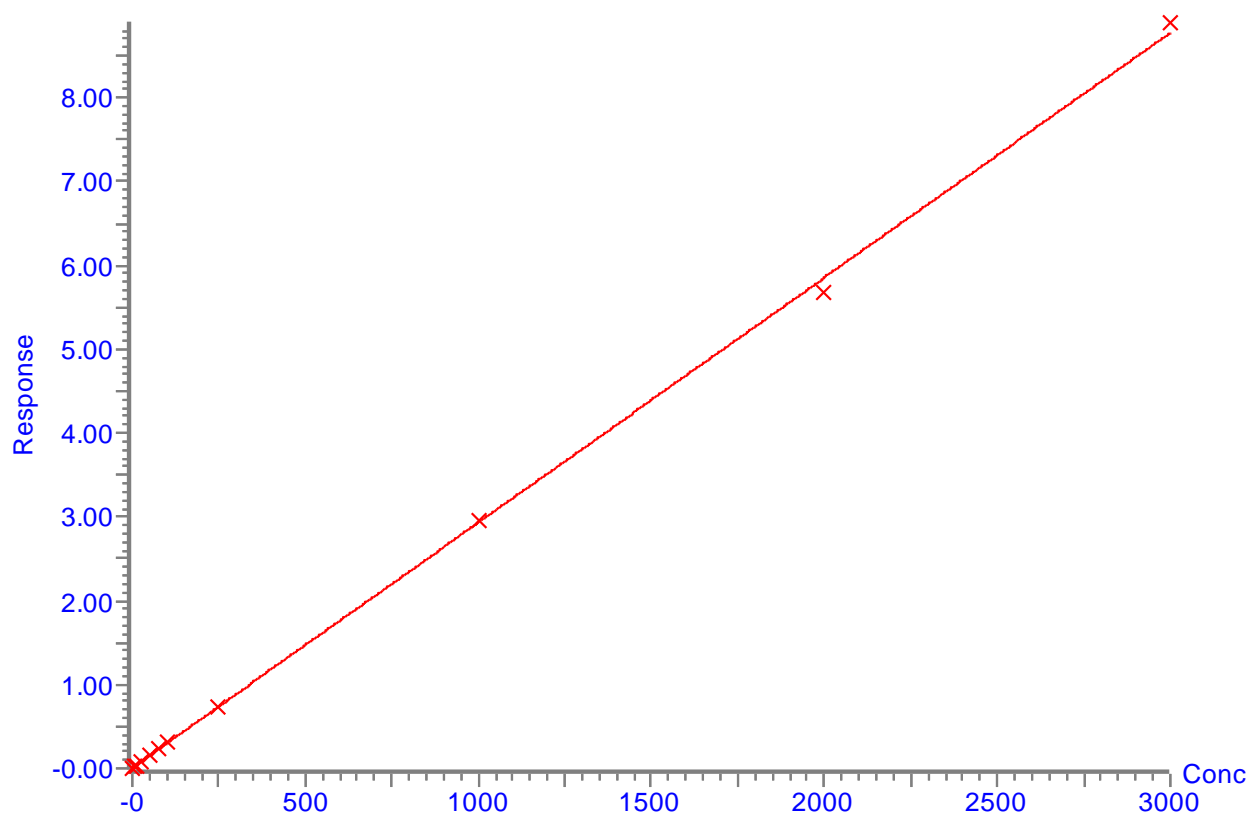

| Aspartic acid |                  |          |        |      |          |
|---------------|------------------|----------|--------|------|----------|
|               | Std Conc (ng/mL) | Response | Conc.  | %Dev | S/N      |
| 1             | 1                | 0.011    | 1.2    | 21.9 | 58.739   |
| 2             | 5                | 0.024    | 5.5    | 9.6  | 315.545  |
| 3             | 7.5              | 0.031    | 7.9    | 4.8  | 209.108  |
| 4             | 10               | 0.039    | 10.8   | 7.7  | 287.046  |
| 5             | 25               | 0.089    | 27.8   | 11.3 | 312.138  |
| 6             | 50               | 0.151    | 49.1   | -1.7 | 678.733  |
| 7             | 75               | 0.237    | 78.6   | 4.8  | 1267.253 |
| 8             | 100              | 0.325    | 108.5  | 8.5  | 655.415  |
| 9             | 250              | 0.731    | 247.4  | -1   | 1350.748 |
| 10            | 1000             | 2.943    | 1004.4 | 0.4  | 3680.649 |
| 11            | 2000             | 5.686    | 1943.1 | -2.8 | 3146.528 |
| 12            | 3000             | 8.895    | 3040.8 | 1.4  | 4304.487 |

Compound name: Malic acid

Correlation coefficient:  $r = 0.998995$ ,  $r^2 = 0.997992$

Calibration curve:  $0.00041664 * x + -2.08854e-005$

Response type: Internal Std ( Ref 2 ), Area \* ( IS Conc. / IS Area )

Curve type: Linear, Origin: Exclude, Weighting: 1/x, Axis trans: None

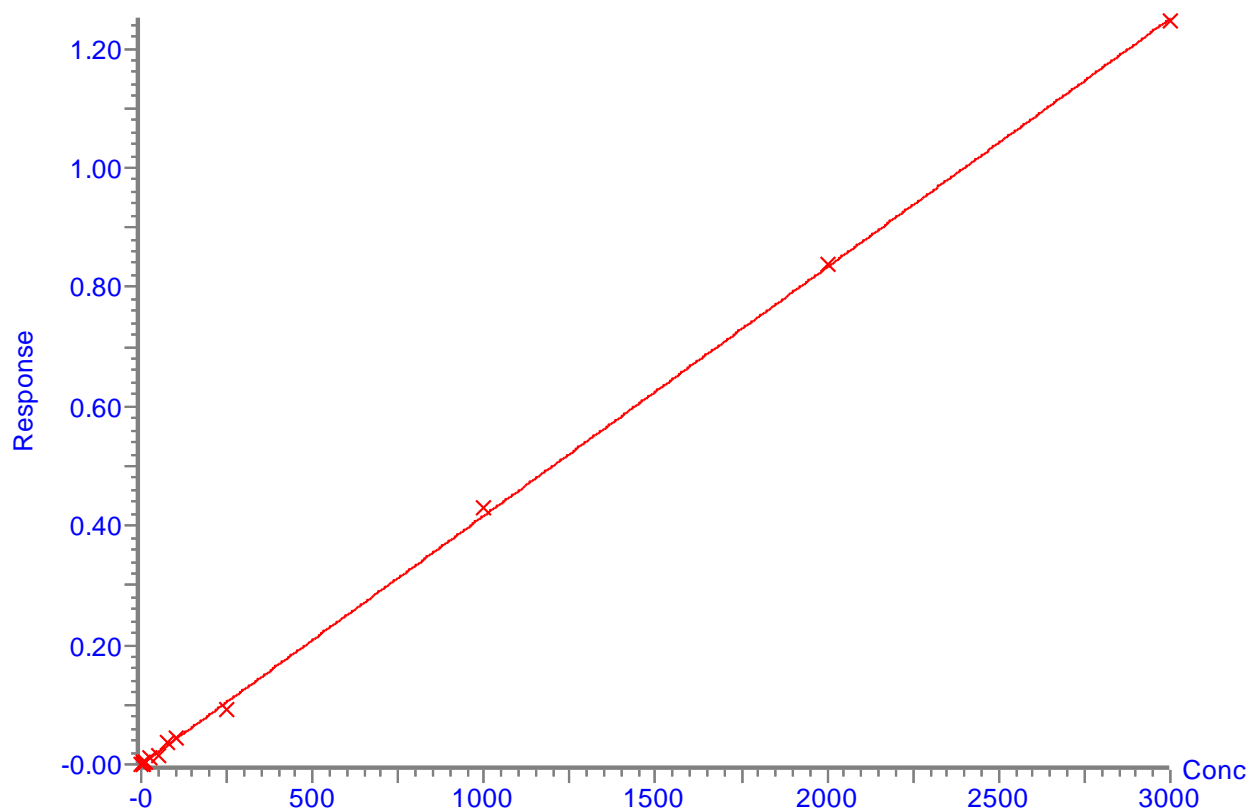

| Malic acid |                  |          |        |       |          |
|------------|------------------|----------|--------|-------|----------|
|            | Std Conc (ng/mL) | Response | Conc.  | %Dev  | S/N      |
| 1          | 1                | 0.001    | 1.3    | 33.7  | 8.419    |
| 2          | 2.5              | 0.001    | 2.7    | 6.3   | 5.725    |
| 3          | 5                | 0.002    | 4.4    | -12.9 | 23.439   |
| 4          | 7.5              | 0.003    | 7      | -6.2  | 40.698   |
| 5          | 10               | 0.005    | 11     | 10.3  | 25.411   |
| 6          | 25               | 0.01     | 23.8   | -4.8  | 43.998   |
| 7          | 75               | 0.035    | 84.8   | 13.1  | 139.548  |
| 8          | 100              | 0.043    | 103.6  | 3.6   | 111.923  |
| 9          | 250              | 0.091    | 219.5  | -12.2 | 420.434  |
| 10         | 1000             | 0.432    | 1036.4 | 3.6   | 1768.697 |
| 11         | 2000             | 0.837    | 2009.4 | 0.5   | 3162.574 |
| 12         | 3000             | 1.245    | 2989.3 | -0.4  | 1826.383 |



Compound name: Homocysteine

Correlation coefficient:  $r = 0.999688$ ,  $r^2 = 0.999376$

Calibration curve:  $0.0004124 * x + 0.00427699$

Response type: Internal Std ( Ref 2 ), Area \* ( IS Conc. / IS Area )

Curve type: Linear, Origin: Exclude, Weighting:  $1/x$ , Axis trans: None

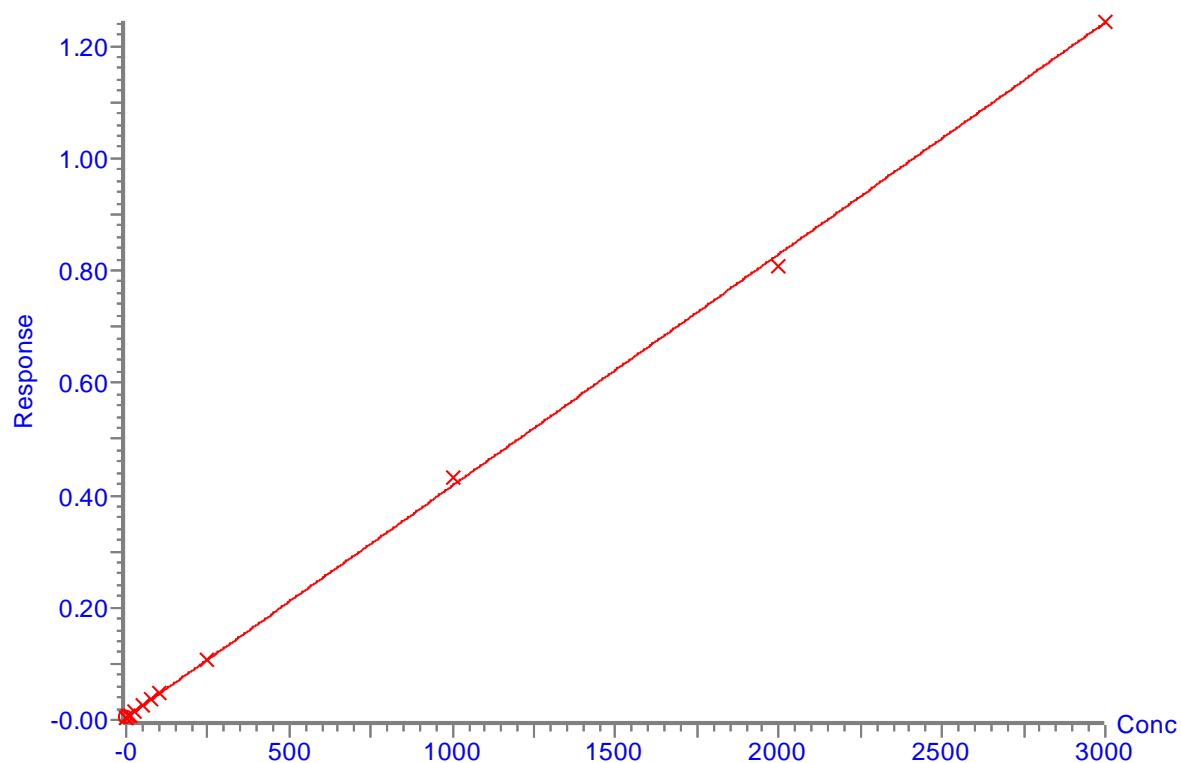

| Homocysteine |                  |          |        |       |          |
|--------------|------------------|----------|--------|-------|----------|
|              | Std Conc (ng/mL) | Response | Conc.  | %Dev  | S/N      |
| 1            | 1                | 0.005    | 0.7    | -33.7 | 146.988  |
| 2            | 5                | 0.006    | 4.8    | -3.3  | 403.054  |
| 3            | 7.5              | 0.007    | 6.6    | -11.6 | 188.437  |
| 4            | 10               | 0.009    | 11.5   | 15.5  | 220.005  |
| 5            | 25               | 0.016    | 28.9   | 15.4  | 345.835  |
| 6            | 50               | 0.027    | 55.1   | 10.1  | 1224.045 |
| 7            | 75               | 0.036    | 77.6   | 3.4   | 1478.894 |
| 8            | 100              | 0.047    | 102.5  | 2.5   | 299.599  |
| 9            | 250              | 0.108    | 252.3  | 0.9   | 2376.68  |
| 10           | 1000             | 0.43     | 1031.4 | 3.1   | 4210.038 |
| 11           | 2000             | 0.808    | 1949.2 | -2.5  | 5012.416 |
| 12           | 3000             | 1.243    | 3002.9 | 0.1   | 3845.646 |

Compound name: aKGA\_152

Correlation coefficient:  $r = 0.998891$ ,  $r^2 = 0.997783$

Calibration curve:  $0.000814376 * x + 0.0087788$

Response type: Internal Std ( Ref 2 ), Area \* ( IS Conc. / IS Area )

Curve type: Linear, Origin: Exclude, Weighting: 1/x, Axis trans: None

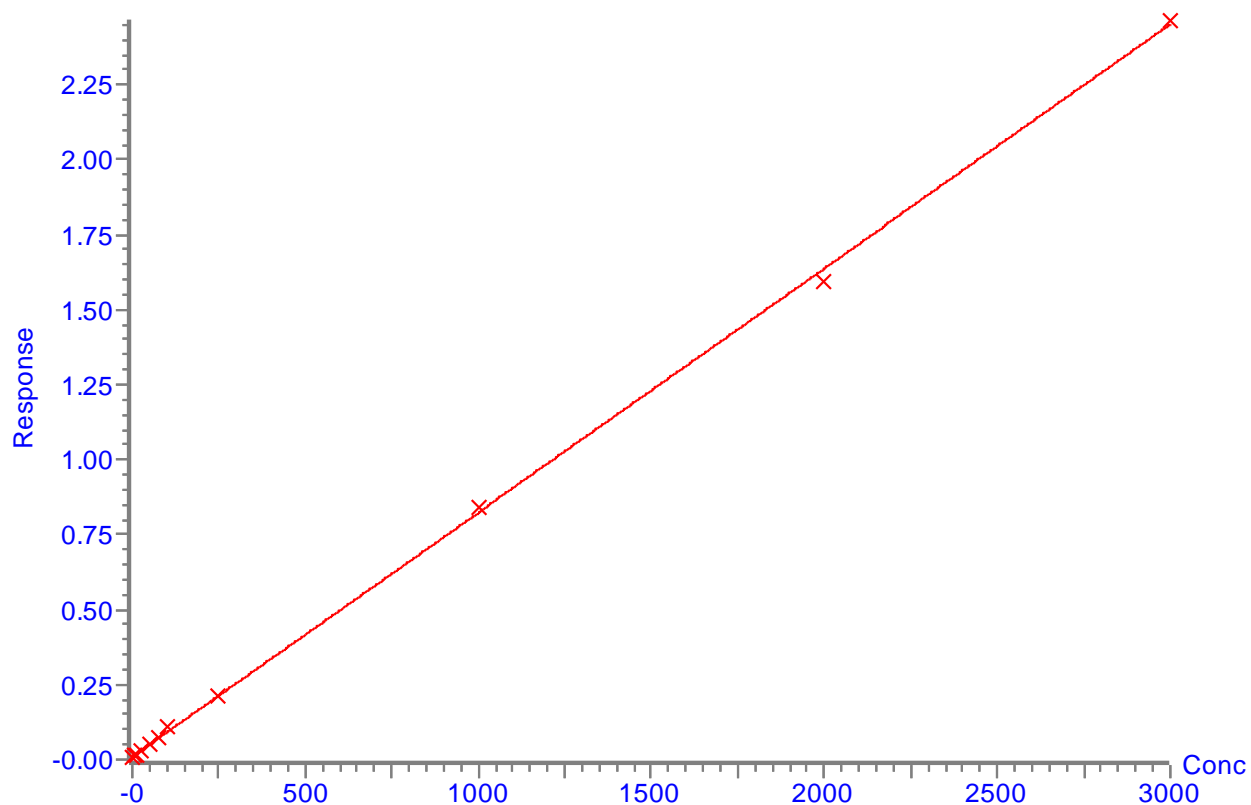

| Alpha-keto-glutaric acid |                  |          |        |      |          |
|--------------------------|------------------|----------|--------|------|----------|
|                          | Std Conc (ng/mL) | Response | Conc.  | %Dev | S/N      |
| 1                        | 5                | 0.013    | 5.4    | 7.7  | 124.262  |
| 2                        | 7.5              | 0.015    | 7.1    | -4.9 | 102.656  |
| 3                        | 10               | 0.016    | 9.2    | -7.8 | 71.14    |
| 4                        | 25               | 0.029    | 25.1   | 0.2  | 102.525  |
| 5                        | 50               | 0.054    | 55.1   | 10.1 | 336.385  |
| 6                        | 75               | 0.07     | 75.1   | 0.1  | 287.371  |
| 7                        | 100              | 0.108    | 122.4  | 22.4 | 444.491  |
| 8                        | 250              | 0.213    | 250.2  | 0.1  | 843.036  |
| 9                        | 1000             | 0.838    | 1018.2 | 1.8  | 1458.003 |
| 10                       | 2000             | 1.591    | 1942.9 | -2.9 | 1510.92  |
| 11                       | 3000             | 2.464    | 3014.3 | 0.5  | 1086.407 |

Compound name: Glutamine\_152

Correlation coefficient:  $r = 0.999356$ ,  $r^2 = 0.998712$

Calibration curve:  $0.00100782 * x + 0.00943305$

Response type: Internal Std ( Ref 2 ), Area \* ( IS Conc. / IS Area )

Curve type: Linear, Origin: Exclude, Weighting: 1/x, Axis trans: None

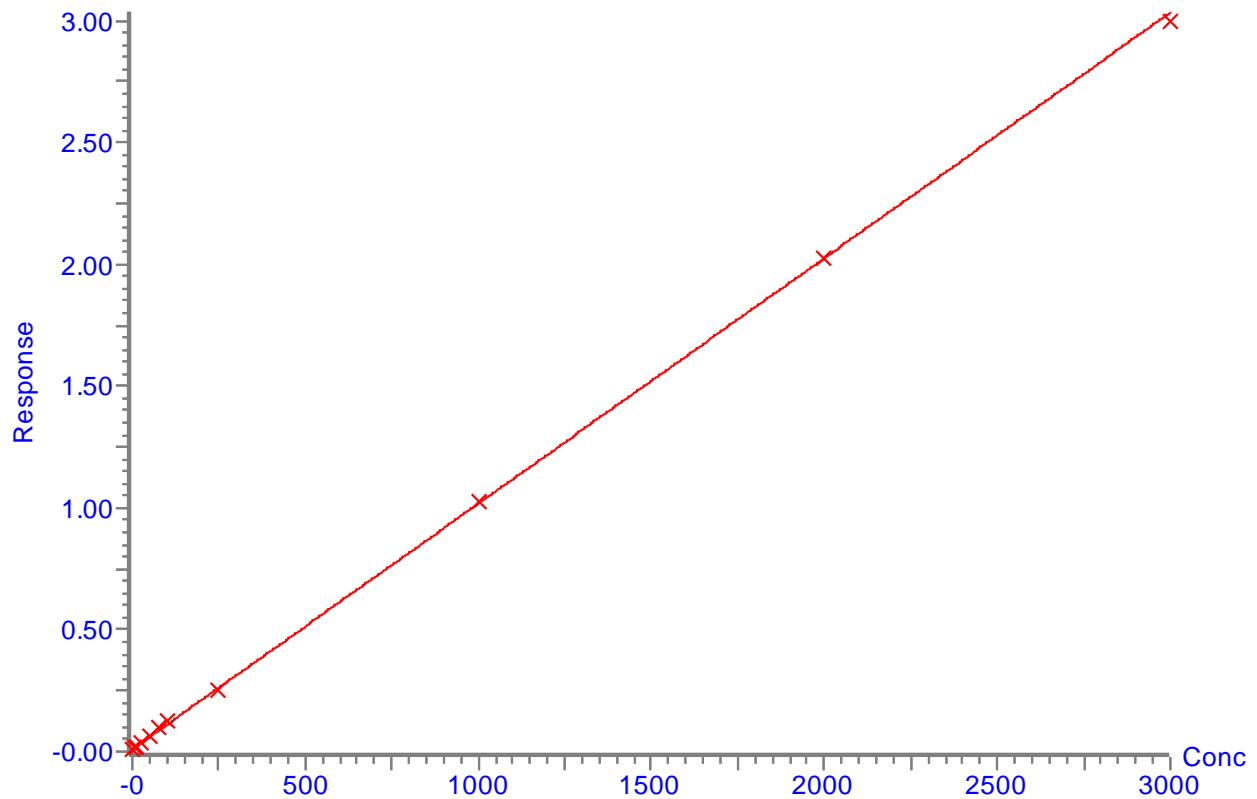

| Glutamine |                  |          |        |      |          |
|-----------|------------------|----------|--------|------|----------|
|           | Std Conc (ng/mL) | Response | Conc.  | %Dev | S/N      |
| 1         | 5                | 0.014    | 4.9    | -2.8 | 139.098  |
| 2         | 7.5              | 0.017    | 7.2    | -4   | 101.091  |
| 3         | 10               | 0.02     | 10.8   | 8    | 63.539   |
| 4         | 25               | 0.036    | 26.2   | 4.8  | 137.775  |
| 5         | 50               | 0.062    | 52.5   | 5    | 250.312  |
| 6         | 75               | 0.097    | 86.6   | 15.5 | 633.039  |
| 7         | 100              | 0.123    | 113    | 13   | 490.594  |
| 8         | 250              | 0.253    | 241.6  | -3.4 | 746.382  |
| 9         | 1000             | 1.03     | 1012.4 | 1.2  | 1621.754 |
| 10        | 2000             | 2.029    | 2004   | 0.2  | 1932.759 |
| 11        | 3000             | 2.998    | 2965.4 | -1.2 | 1474.488 |

Compound name: Methionine\_152

Correlation coefficient:  $r = 0.999559$ ,  $r^2 = 0.999119$

Calibration curve:  $4.62315 \times 10^{-5} \cdot x + 0.00268953$

Response type: Internal Std ( Ref 2 ), Area \* ( IS Conc. / IS Area )

Curve type: Linear, Origin: Exclude, Weighting: 1/x, Axis trans: None

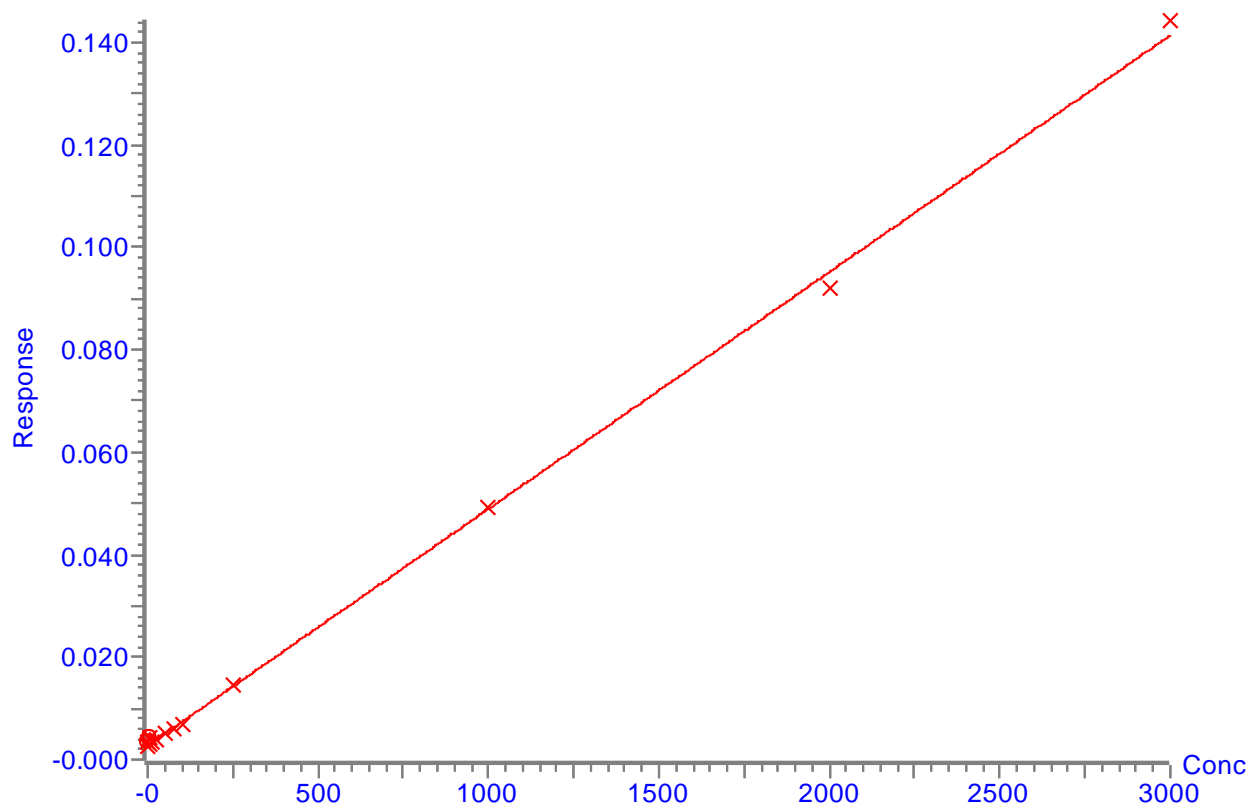

| Methionine |                  |          |        |      |         |
|------------|------------------|----------|--------|------|---------|
|            | Std Conc (ng/mL) | Response | Conc.  | %Dev | S/N     |
| 1          | 7.5              | 0.003    | 7.8    | 4.4  | 34.616  |
| 2          | 10               | 0.003    | 11.9   | 19.3 | 41.675  |
| 3          | 25               | 0.004    | 27     | 8    | 61.381  |
| 4          | 50               | 0.005    | 50     | -0.1 | 40.626  |
| 5          | 75               | 0.006    | 75.2   | 0.3  | 39.201  |
| 6          | 100              | 0.007    | 91.4   | -8.6 | 65.268  |
| 7          | 250              | 0.015    | 258    | 3.2  | 50.736  |
| 8          | 1000             | 0.049    | 1006.5 | 0.7  | 198.578 |
| 9          | 2000             | 0.092    | 1928.3 | -3.6 | 119.426 |
| 10         | 3000             | 0.144    | 3062   | 2.1  | 327.797 |

Compound name: Orotic acid

Correlation coefficient:  $r = 0.999248$ ,  $r^2 = 0.998497$

Calibration curve:  $0.000893395 * x + 0.032125$

Response type: Internal Std ( Ref 2 ), Area \* ( IS Conc. / IS Area )

Curve type: Linear, Origin: Exclude, Weighting: 1/x, Axis trans: None

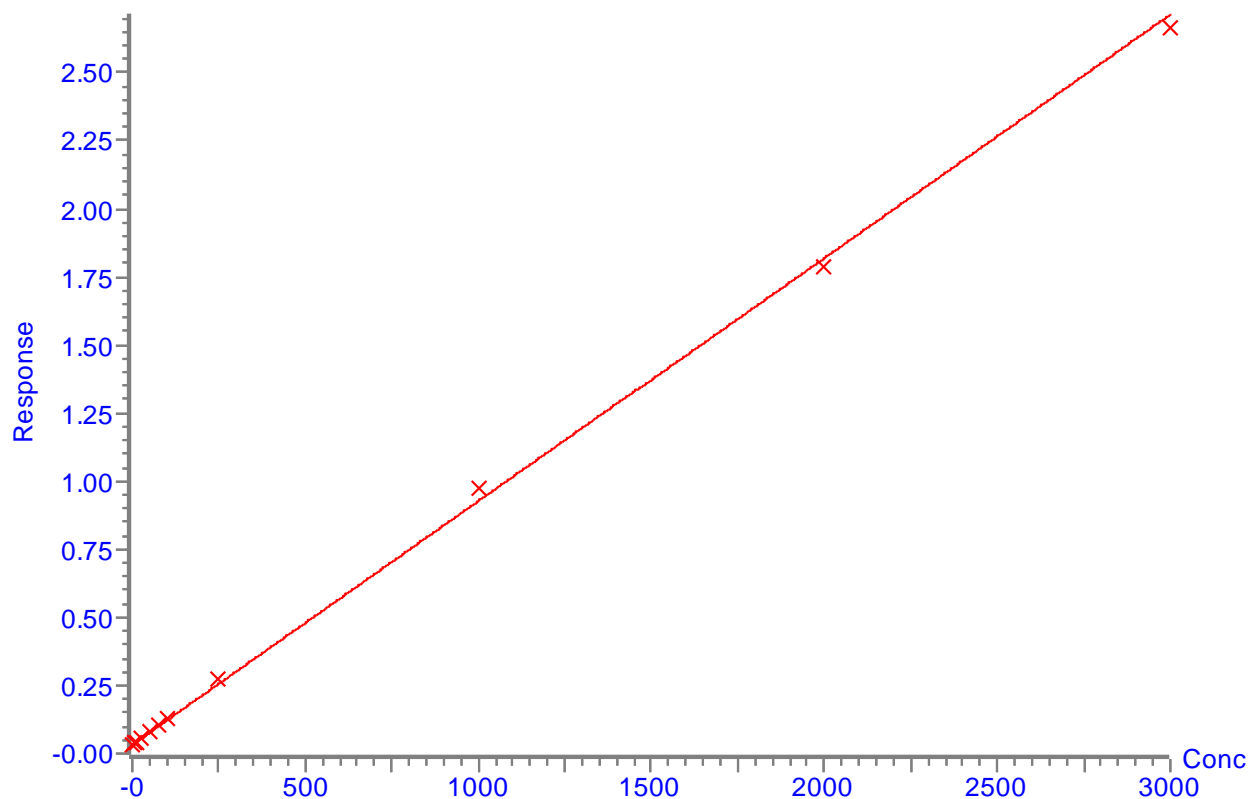

| Orotic acid |                  |          |        |      |         |
|-------------|------------------|----------|--------|------|---------|
|             | Std Conc (ng/mL) | Response | Conc.  | %Dev | S/N     |
| 1           | 1                | 0.033    | 1.1    | 7.4  | 130.403 |
| 2           | 5                | 0.037    | 5.8    | 16.5 | 163.758 |
| 3           | 7.5              | 0.04     | 8.5    | 12.7 | 171.48  |
| 4           | 10               | 0.043    | 12.6   | 25.7 | 109.247 |
| 5           | 25               | 0.055    | 26.1   | 4.3  | 95.644  |
| 6           | 50               | 0.08     | 54.1   | 8.3  | 325.824 |
| 7           | 75               | 0.103    | 79.5   | 6    | 267.907 |
| 8           | 100              | 0.125    | 104.3  | 4.3  | 236.986 |
| 9           | 250              | 0.271    | 266.8  | 6.7  | 353.954 |
| 10          | 1000             | 0.975    | 1055.1 | 5.5  | 770.713 |
| 11          | 2000             | 1.79     | 1967.1 | -1.6 | 602.851 |
| 12          | 3000             | 2.663    | 2944.8 | -1.8 | 829.658 |

Compound name: Methyl adipic acid  
 Correlation coefficient:  $r = 0.999696$ ,  $r^2 = 0.999392$   
 Calibration curve:  $0.00899636 * x + 0.246154$   
 Response type: Internal Std ( Ref 2 ), Area \* ( IS Conc. / IS Area )  
 Curve type: Linear, Origin: Exclude, Weighting: 1/x, Axis trans: None

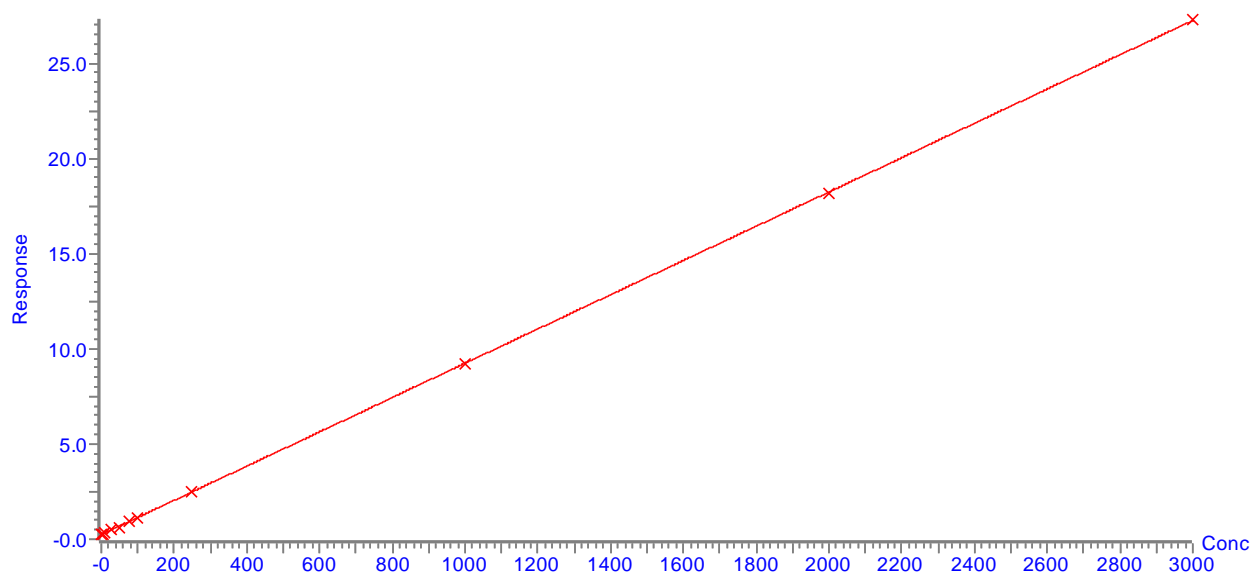

| 3-Methyl adipic acid |                  |          |        |       |           |
|----------------------|------------------|----------|--------|-------|-----------|
|                      | Std Conc (ng/mL) | Response | Conc.  | %Dev  | S/N       |
| 1                    | 1                | 0.254    | 0.9    | -7.5  | 2950.632  |
| 2                    | 5                | 0.298    | 5.8    | 15.5  | 4485.552  |
| 3                    | 7.5              | 0.332    | 9.6    | 27.8  | 3264.924  |
| 4                    | 10               | 0.369    | 13.6   | 36    | 1839.697  |
| 5                    | 25               | 0.486    | 26.6   | 6.5   | 2328.618  |
| 6                    | 50               | 0.644    | 44.2   | -11.6 | 2955.949  |
| 7                    | 75               | 0.915    | 74.4   | -0.8  | 3138.629  |
| 8                    | 100              | 1.151    | 100.6  | 0.6   | 3744.729  |
| 9                    | 250              | 2.488    | 249.2  | -0.3  | 7354.977  |
| 10                   | 1000             | 9.242    | 1000   | 0     | 11577.701 |
| 11                   | 2000             | 18.189   | 1994.4 | -0.3  | 14753.171 |
| 12                   | 3000             | 27.287   | 3005.8 | 0.2   | 17835.707 |

Compound name: N-Acetyl glutamine

Correlation coefficient:  $r = 0.999387$ ,  $r^2 = 0.998775$

Calibration curve:  $0.000168394 * x + 0.000398661$

Response type: Internal Std ( Ref 2 ), Area \* ( IS Conc. / IS Area )

Curve type: Linear, Origin: Exclude, Weighting: 1/x, Axis trans: None

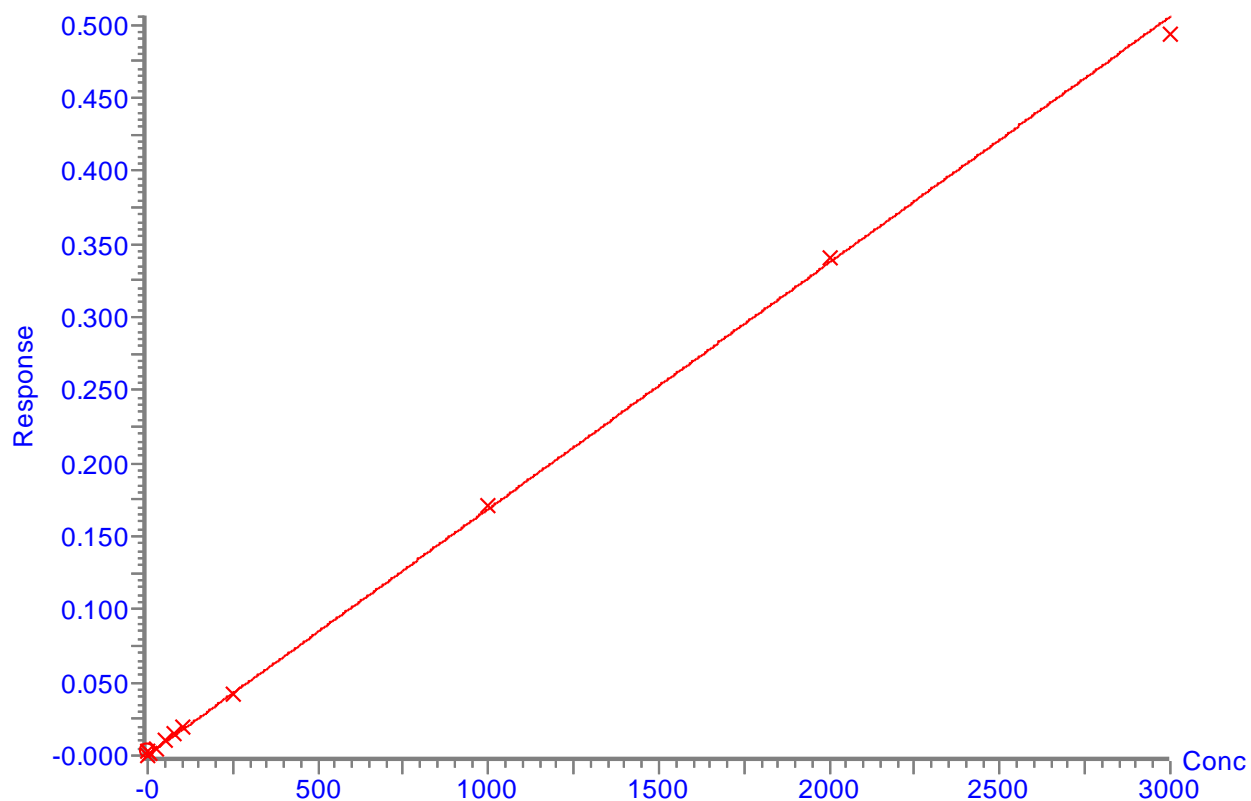

| N-acetyl glutamine |                  |          |        |      |         |
|--------------------|------------------|----------|--------|------|---------|
|                    | Std Conc (ng/mL) | Response | Conc.  | %Dev | S/N     |
| 1                  | 5                | 0.001    | 5      | -0.6 | 11.369  |
| 2                  | 7.5              | 0.002    | 9.5    | 26.7 | 8.383   |
| 3                  | 25               | 0.006    | 32     | 28.1 | 10.855  |
| 4                  | 50               | 0.011    | 59.2   | 18.5 | 24.198  |
| 5                  | 75               | 0.015    | 85.5   | 14   | 30.721  |
| 6                  | 100              | 0.019    | 108.4  | 8.4  | 35.322  |
| 7                  | 250              | 0.042    | 248    | -0.8 | 66.517  |
| 8                  | 1000             | 0.171    | 1014.7 | 1.5  | 218.669 |
| 9                  | 2000             | 0.341    | 2023.3 | 1.2  | 154.767 |
| 10                 | 3000             | 0.494    | 2929.3 | -2.4 | 138.155 |

Compound name: Ascorbic acid

Correlation coefficient:  $r = 0.999671$ ,  $r^2 = 0.999342$

Calibration curve:  $0.000394784 * x + 0.19762$

Response type: Internal Std ( Ref 2 ), Area \* ( IS Conc. / IS Area )

Curve type: Linear, Origin: Exclude, Weighting: 1/x, Axis trans: None

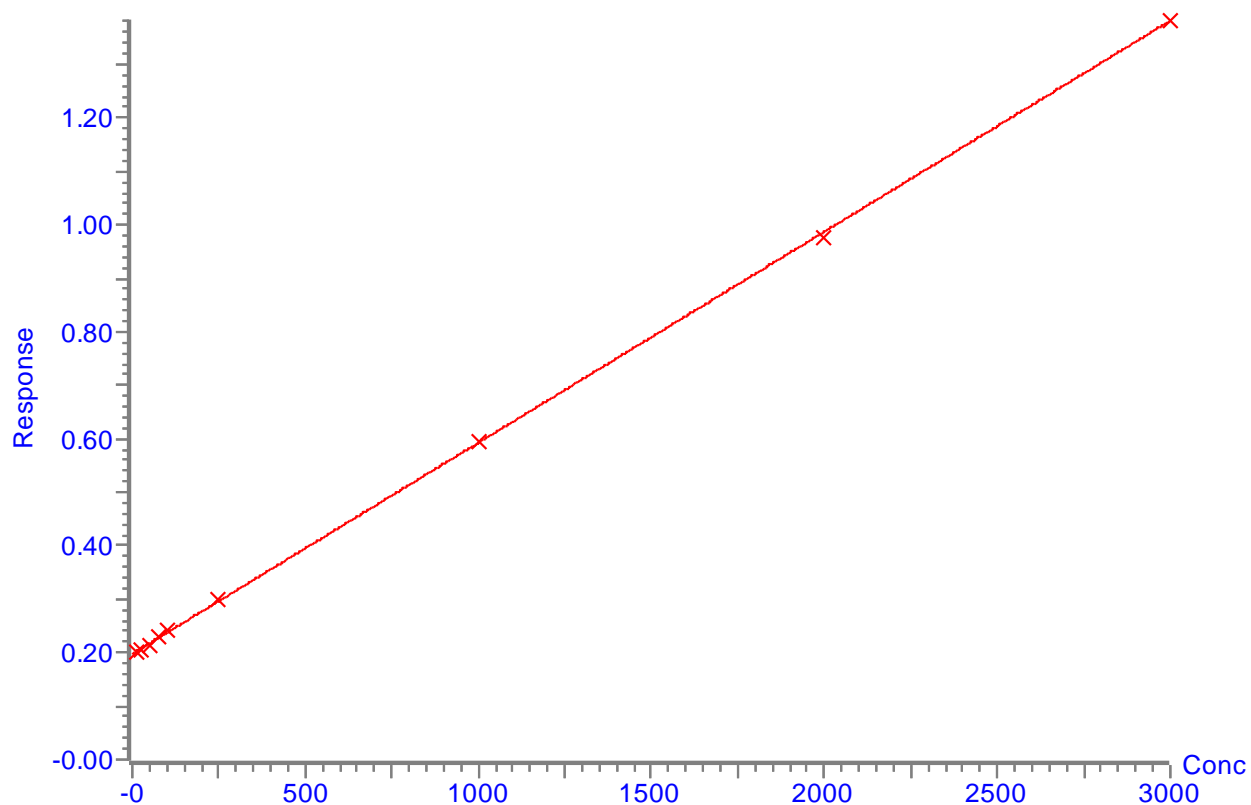

| Ascorbic acid |                  |          |        |       |          |
|---------------|------------------|----------|--------|-------|----------|
|               | Std Conc (ng/mL) | Response | Conc.  | %Dev  | S/N      |
| 1             | 10               | 0.202    | 9.9    | -1.4  | 1484.186 |
| 2             | 25               | 0.206    | 22.4   | -10.4 | 1535.161 |
| 3             | 50               | 0.215    | 44.7   | -10.6 | 1476.083 |
| 4             | 75               | 0.229    | 78.6   | 4.8   | 1674.704 |
| 5             | 100              | 0.243    | 115.8  | 15.8  | 1810.019 |
| 6             | 250              | 0.298    | 255.5  | 2.2   | 1753.098 |
| 7             | 1000             | 0.596    | 1008.6 | 0.9   | 3433.815 |
| 8             | 2000             | 0.978    | 1975.9 | -1.2  | 3453.523 |
| 9             | 3000             | 1.381    | 2998.6 | 0     | 4531.584 |



Compound name: 3-Nitrotyrosine

Correlation coefficient:  $r = 0.999897$ ,  $r^2 = 0.999794$

Calibration curve:  $0.000510407 \cdot x + 0.106181$

Response type: Internal Std ( Ref 2 ), Area \* ( IS Conc. / IS Area )

Curve type: Linear, Origin: Exclude, Weighting: 1/x, Axis trans: None

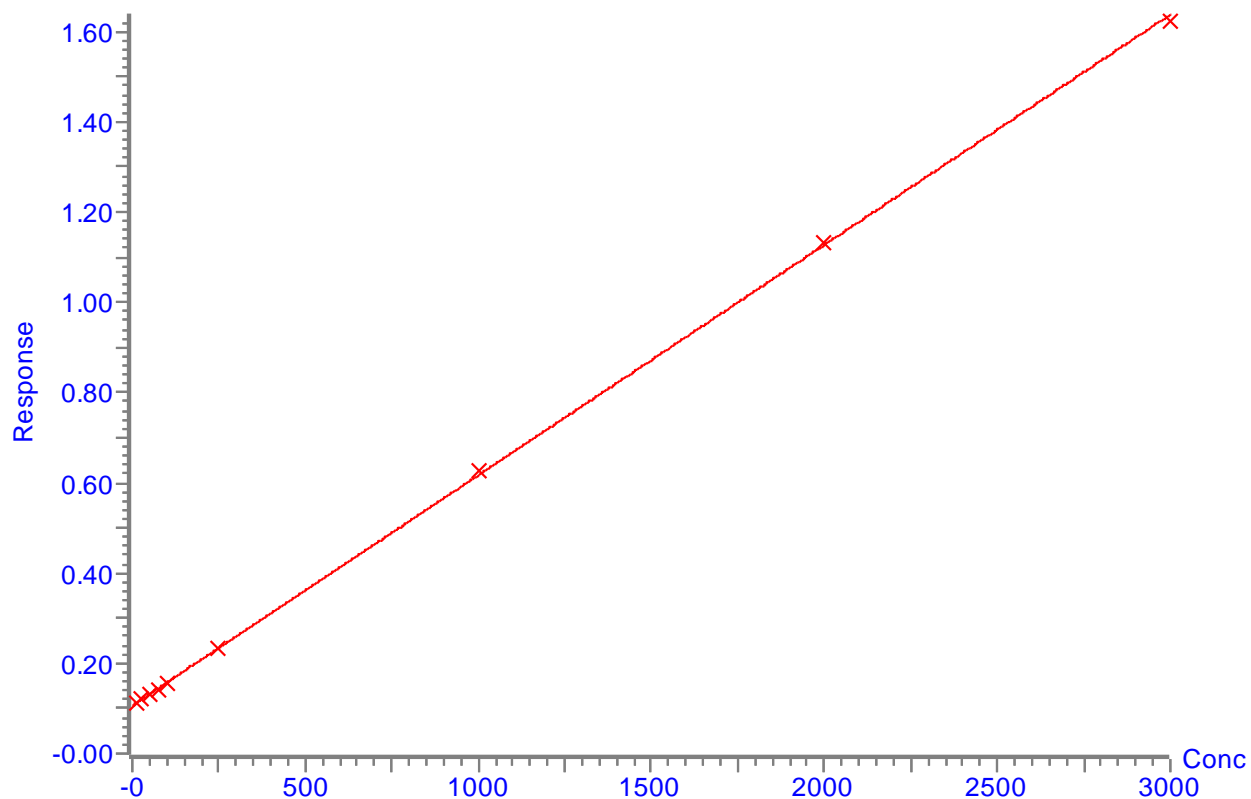

| 3-Nitrotyrosine |                  |          |        |      |         |
|-----------------|------------------|----------|--------|------|---------|
|                 | Std Conc (ng/mL) | Response | Conc.  | %Dev | S/N     |
| 1               | 10               | 0.111    | 10.2   | 2.1  | 279.203 |
| 2               | 25               | 0.119    | 25.6   | 2.4  | 193.576 |
| 3               | 50               | 0.131    | 48.4   | -3.2 | 274.018 |
| 4               | 75               | 0.142    | 71     | -5.4 | 235.879 |
| 5               | 100              | 0.158    | 101    | 1    | 172.438 |
| 6               | 250              | 0.236    | 253.4  | 1.4  | 316.201 |
| 7               | 1000             | 0.628    | 1023.3 | 2.3  | 241.99  |
| 8               | 2000             | 1.131    | 2008.5 | 0.4  | 550.553 |
| 9               | 3000             | 1.621    | 2968.5 | -1   | 282.509 |

Compound name: MMA\_180

Correlation coefficient:  $r = 0.999480$ ,  $r^2 = 0.998960$

Calibration curve:  $0.000254513 * x + 0.0458174$

Response type: Internal Std ( Ref 2 ), Area \* ( IS Conc. / IS Area )

Curve type: Linear, Origin: Exclude, Weighting: 1/x, Axis trans: None

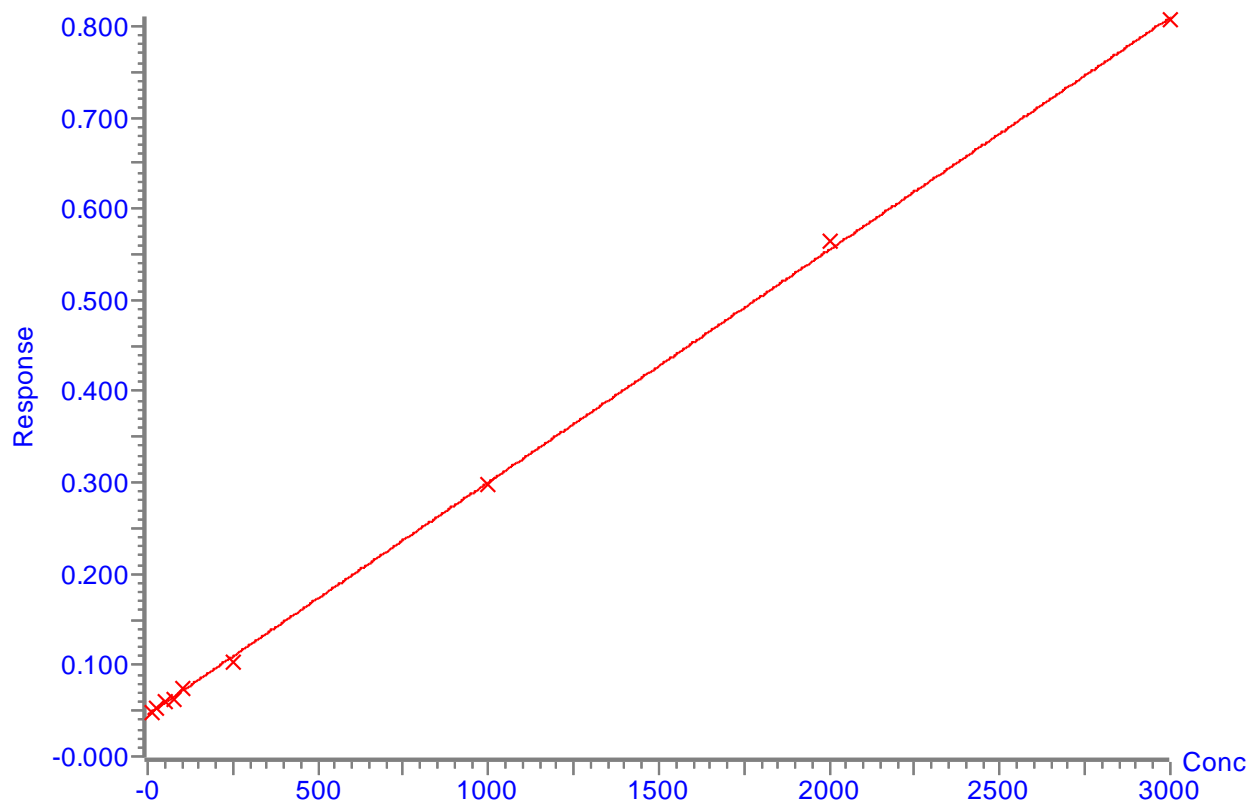

| Methyl malonic acid |                  |          |        |      |         |
|---------------------|------------------|----------|--------|------|---------|
|                     | Std Conc (ng/mL) | Response | Conc.  | %Dev | S/N     |
| 1                   | 10               | 0.049    | 10.8   | 7.7  | 72.804  |
| 2                   | 25               | 0.052    | 24.3   | -2.9 | 124.989 |
| 3                   | 50               | 0.06     | 56     | 12.1 | 71.765  |
| 4                   | 75               | 0.062    | 62.2   | -17  | 30.926  |
| 5                   | 100              | 0.073    | 108    | 8    | 95.107  |
| 6                   | 250              | 0.104    | 228.5  | -8.6 | 184.353 |
| 7                   | 1000             | 0.298    | 991.8  | -0.8 | 312.34  |
| 8                   | 2000             | 0.565    | 2039   | 2    | 235.456 |
| 9                   | 3000             | 0.807    | 2989.3 | -0.4 | 157.563 |

Compound name: Docosatetraenoic acid

Correlation coefficient:  $r = 0.999542$ ,  $r^2 = 0.999083$

Calibration curve:  $0.000364727 * x + 0.0186498$

Response type: Internal Std ( Ref 2 ), Area \* ( IS Conc. / IS Area )

Curve type: Linear, Origin: Exclude, Weighting: 1/x, Axis trans: None

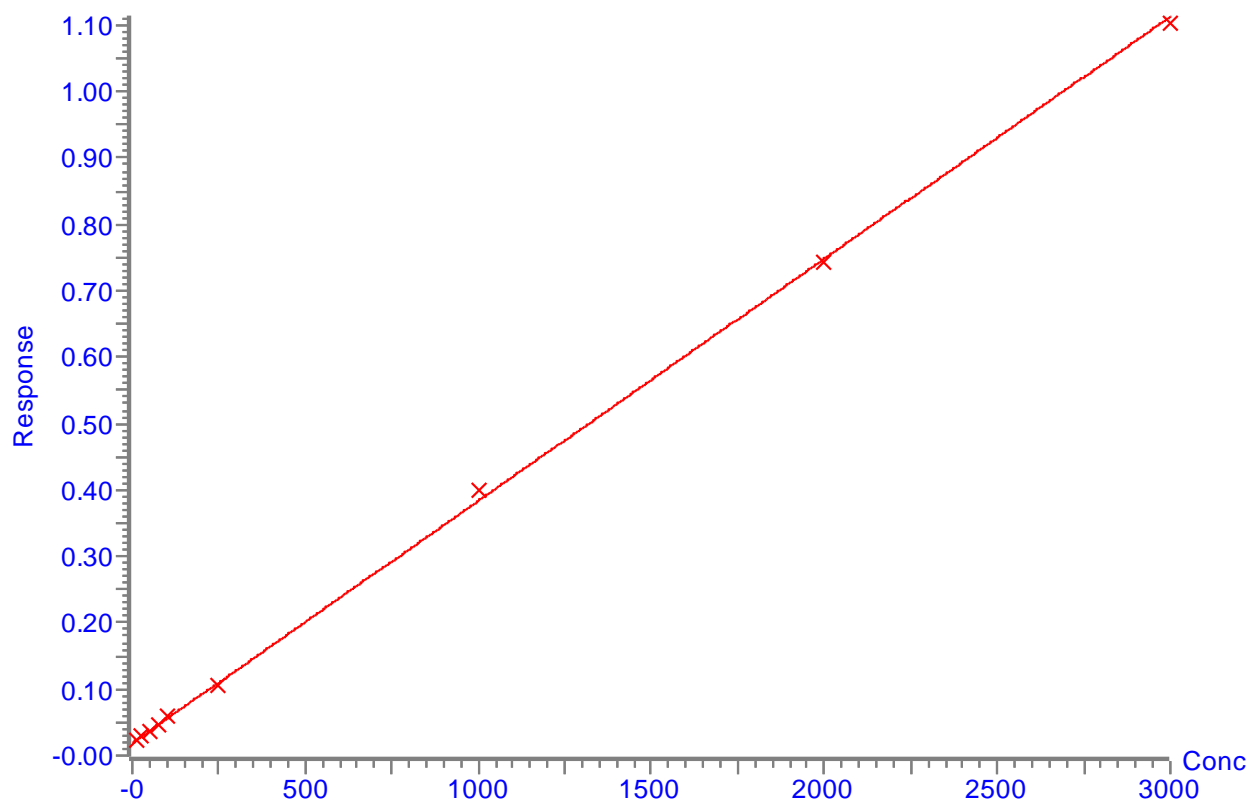

| Docosatetraenoic acid |                  |          |        |       |          |
|-----------------------|------------------|----------|--------|-------|----------|
|                       | Std Conc (ng/mL) | Response | Conc.  | %Dev  | S/N      |
| 1                     | 10               | 0.022    | 8.8    | -11.9 | 127.435  |
| 2                     | 25               | 0.029    | 28.6   | 14.6  | 184.379  |
| 3                     | 50               | 0.035    | 45.3   | -9.5  | 355.49   |
| 4                     | 75               | 0.045    | 71.4   | -4.9  | 496.697  |
| 5                     | 100              | 0.06     | 112.1  | 12.1  | 530.818  |
| 6                     | 250              | 0.107    | 241.7  | -3.3  | 878.552  |
| 7                     | 1000             | 0.4      | 1046.3 | 4.6   | 1543.57  |
| 8                     | 2000             | 0.743    | 1985.7 | -0.7  | 1072.081 |
| 9                     | 3000             | 1.102    | 2970.2 | -1    | 1561.537 |

Compound name: Palmitic acid\_179

Correlation coefficient:  $r = 0.999425$ ,  $r^2 = 0.998851$

Calibration curve:  $0.00486967 * x + 0.34432$

Response type: Internal Std ( Ref 2 ), Area \* ( IS Conc. / IS Area )

Curve type: Linear, Origin: Exclude, Weighting: 1/x, Axis trans: None

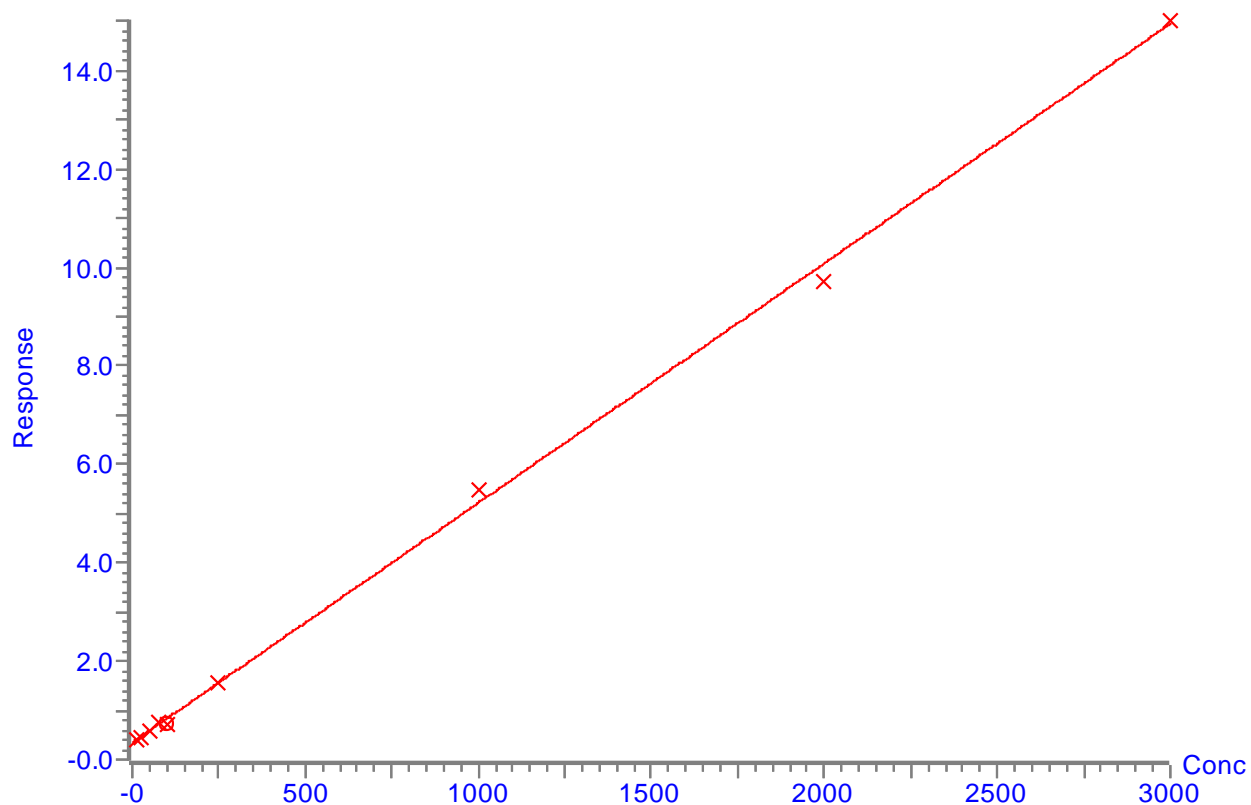

| Palmitic acid |                  |          |        |       |           |
|---------------|------------------|----------|--------|-------|-----------|
|               | Std Conc (ng/mL) | Response | Conc.  | %Dev  | S/N       |
| 1             | 10               | 0.391    | 9.7    | -3.2  | 1113.135  |
| 2             | 25               | 0.462    | 24.1   | -3.4  | 3946.547  |
| 3             | 50               | 0.575    | 47.4   | -5.1  | 6028.302  |
| 4             | 75               | 0.741    | 81.5   | 8.6   | 3645.023  |
| 5             | 100              | 0.73     | 79.2   | -20.8 | 923.577   |
| 6             | 250              | 1.57     | 251.8  | 0.7   | 9527.806  |
| 7             | 1000             | 5.495    | 1057.7 | 5.8   | 15306.201 |
| 8             | 2000             | 9.717    | 1924.7 | -3.8  | 12760.493 |
| 9             | 3000             | 15.017   | 3013.1 | 0.4   | 6947.416  |

Compound name: Glycine

Correlation coefficient:  $r = 0.999805$ ,  $r^2 = 0.999611$

Calibration curve:  $0.00218867 * x + -0.000390896$

Response type: Internal Std ( Ref 2 ), Area \* ( IS Conc. / IS Area )

Curve type: Linear, Origin: Exclude, Weighting: 1/x, Axis trans: None

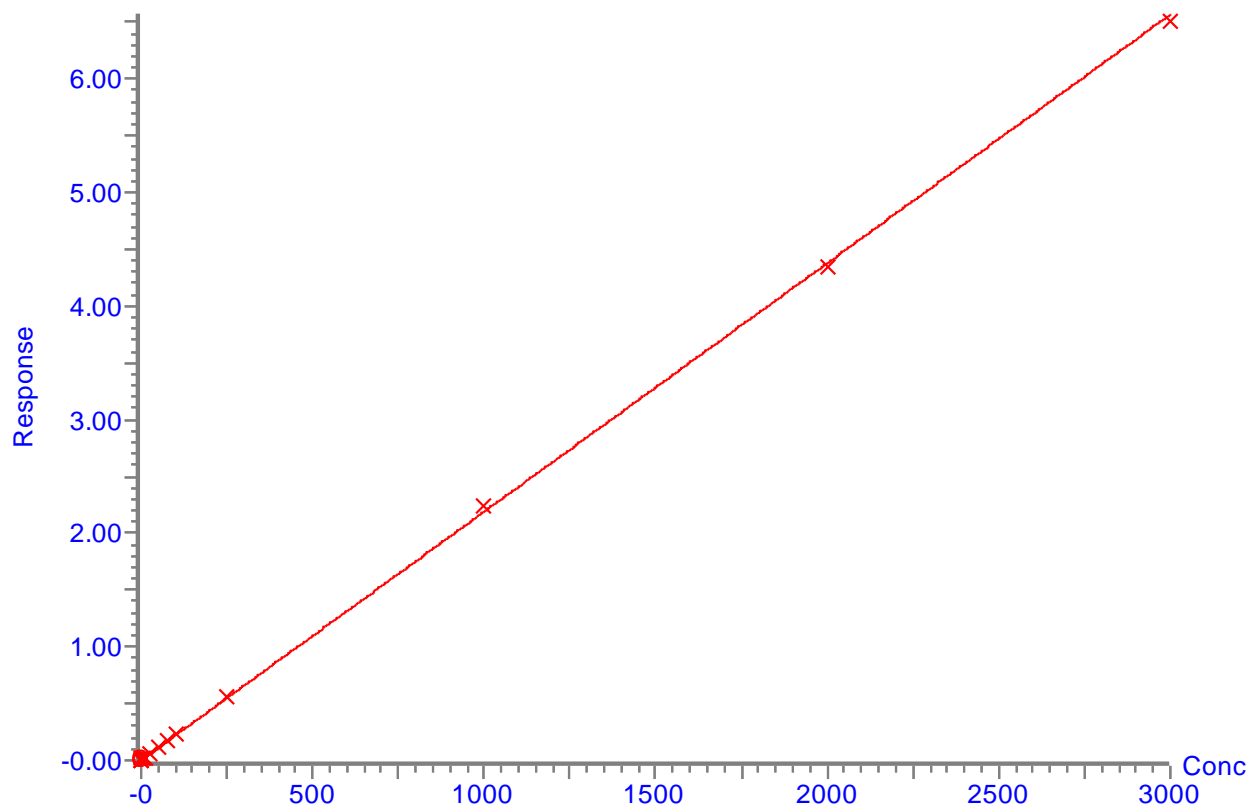

| Glycine |                  |          |        |      |         |
|---------|------------------|----------|--------|------|---------|
|         | Std Conc (ng/mL) | Response | Conc.  | %Dev | S/N     |
| 1       | 1                | 0.002    | 0.9    | -9.9 | 2.592   |
| 2       | 5                | 0.011    | 5      | 0.8  | 50.838  |
| 3       | 7.5              | 0.014    | 6.7    | -11  | 41.95   |
| 4       | 10               | 0.023    | 10.5   | 4.6  | 71.915  |
| 5       | 25               | 0.049    | 22.7   | -9.3 | 88.262  |
| 6       | 50               | 0.124    | 57     | 14.1 | 144.869 |
| 7       | 75               | 0.169    | 77.6   | 3.5  | 109.329 |
| 8       | 100              | 0.23     | 105.4  | 5.4  | 505.257 |
| 9       | 250              | 0.552    | 252.4  | 1    | 381.049 |
| 10      | 1000             | 2.237    | 1022.1 | 2.2  | 768.538 |
| 11      | 2000             | 4.353    | 1988.9 | -0.6 | 577.137 |
| 12      | 3000             | 6.509    | 2974.2 | -0.9 | 816.833 |

Compound name: Sarcosine

Correlation coefficient:  $r = 0.999686$ ,  $r^2 = 0.999372$

Calibration curve:  $0.00104959 * x + 0.110184$

Response type: Internal Std ( Ref 2 ), Area \* ( IS Conc. / IS Area )

Curve type: Linear, Origin: Exclude, Weighting: 1/x, Axis trans: None

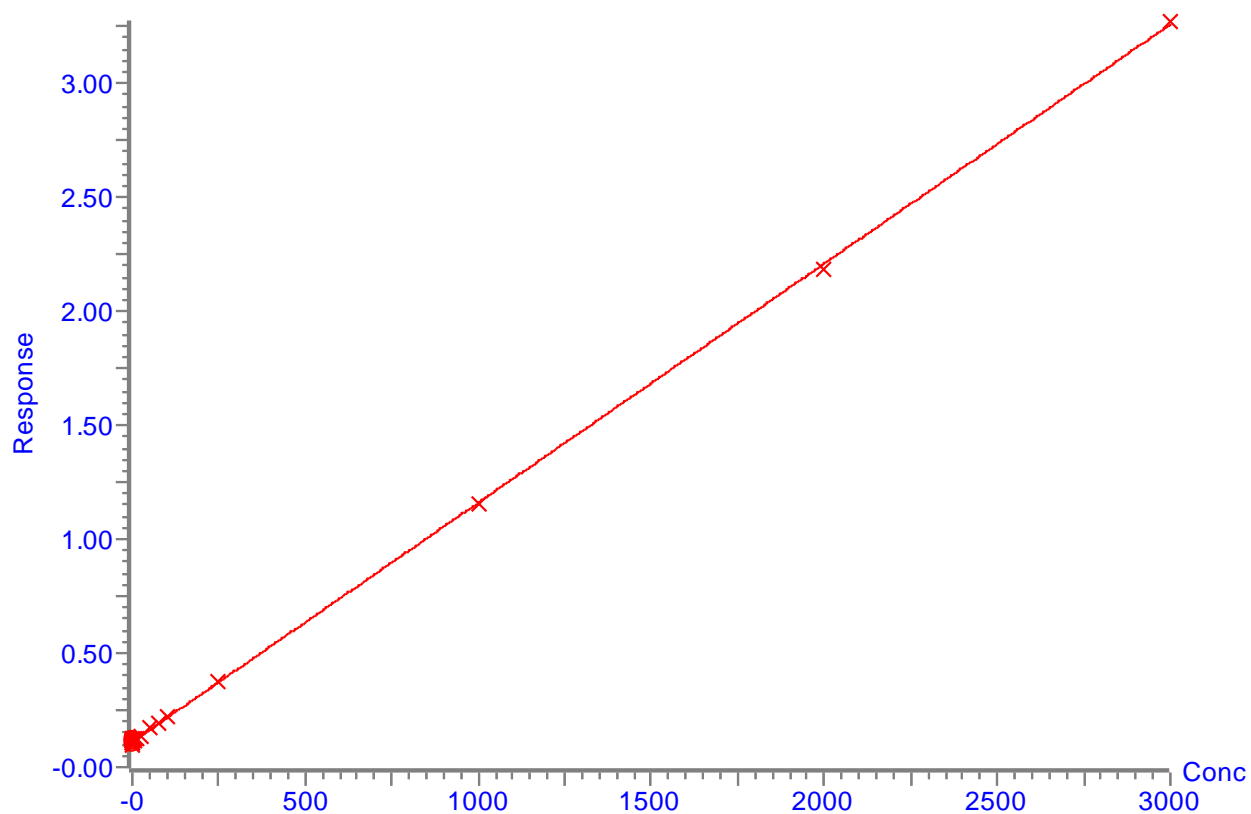

| Sarcosine |                  |          |        |      |          |
|-----------|------------------|----------|--------|------|----------|
|           | Std Conc (ng/mL) | Response | Conc.  | %Dev | S/N      |
| 1         | 2.5              | 0.113    | 2.7    | 9.2  | 214.917  |
| 2         | 5                | 0.115    | 5      | 0.2  | 401.774  |
| 3         | 10               | 0.122    | 11.4   | 13.5 | 106.901  |
| 4         | 25               | 0.137    | 25.3   | 1.4  | 473.746  |
| 5         | 50               | 0.172    | 58.8   | 17.6 | 372.6    |
| 6         | 75               | 0.19     | 75.7   | 0.9  | 419.328  |
| 7         | 100              | 0.22     | 104.7  | 4.7  | 270.337  |
| 8         | 250              | 0.375    | 252.6  | 1    | 788.64   |
| 9         | 1000             | 1.15     | 990.8  | -0.9 | 1201.022 |
| 10        | 2000             | 2.185    | 1976.4 | -1.2 | 2941.195 |
| 11        | 3000             | 3.272    | 3012.2 | 0.4  | 2572.065 |

Compound name: Lactic acid

Correlation coefficient:  $r = 0.999628$ ,  $r^2 = 0.999256$

Calibration curve:  $0.00345725 * x + 0.00238623$

Response type: Internal Std ( Ref 2 ), Area \* ( IS Conc. / IS Area )

Curve type: Linear, Origin: Exclude, Weighting:  $1/x$ , Axis trans: None

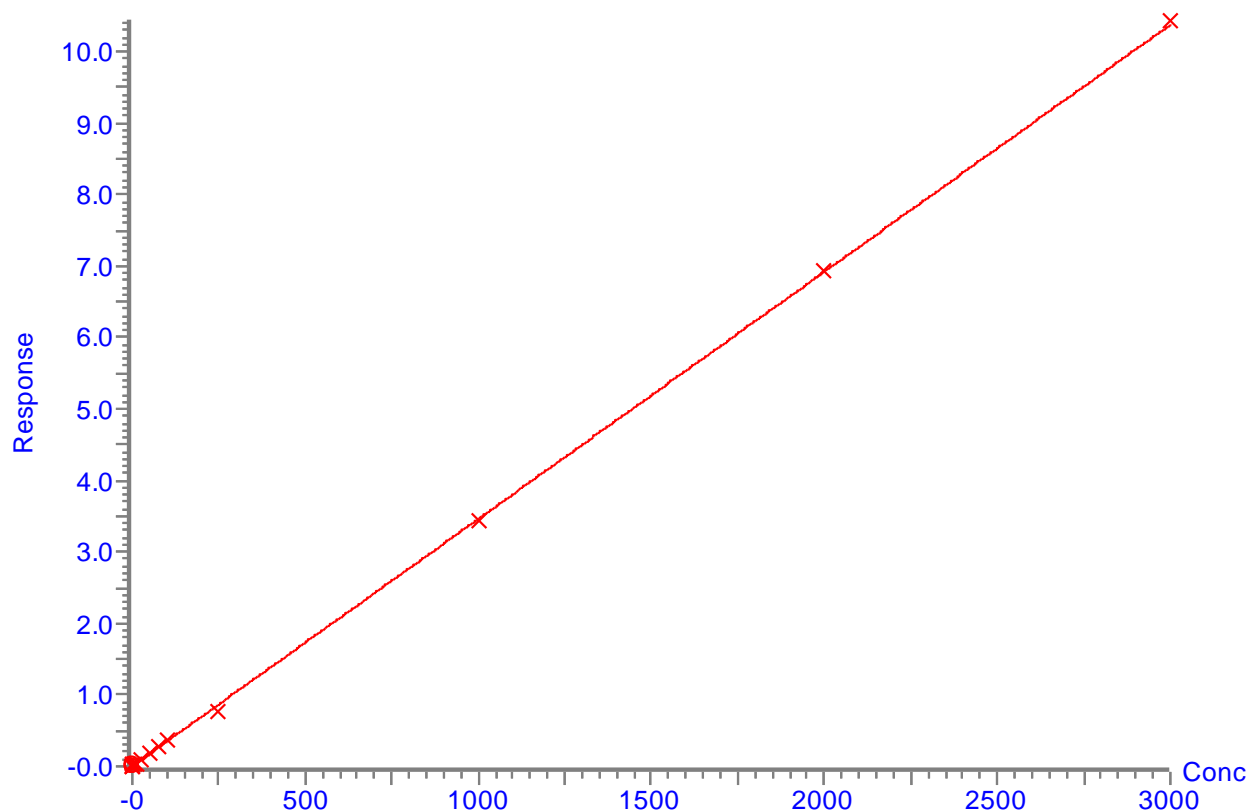

| Lactic acid |                  |          |        |       |          |
|-------------|------------------|----------|--------|-------|----------|
|             | Std Conc (ng/mL) | Response | Conc.  | %Dev  | S/N      |
| 1           | 0.1              | 0.003    | 0.1    | -30.4 | 4.955    |
| 2           | 0.5              | 0.004    | 0.5    | -6.8  | 16.851   |
| 3           | 0.75             | 0.005    | 0.7    | -9.6  | 18.828   |
| 4           | 1                | 0.006    | 1      | -3.3  | 9.017    |
| 5           | 5                | 0.02     | 5.2    | 4.2   | 130.329  |
| 6           | 10               | 0.041    | 11.2   | 12.2  | 249.28   |
| 7           | 50               | 0.189    | 54     | 8.1   | 837.488  |
| 8           | 100              | 0.356    | 102.4  | 2.4   | 1204.368 |
| 9           | 250              | 0.769    | 221.9  | -11.3 | 1872.788 |
| 10          | 1000             | 3.434    | 992.6  | -0.7  | 4005.933 |
| 11          | 2000             | 6.921    | 2001.3 | 0.1   | 3333.84  |
| 12          | 3000             | 10.431   | 3016.6 | 0.6   | 2976.899 |

Compound name: Oxalic acid

Correlation coefficient:  $r = 0.998438$ ,  $r^2 = 0.996878$

Calibration curve:  $0.000671286 * x + 0.0197405$

Response type: Internal Std ( Ref 2 ), Area \* ( IS Conc. / IS Area )

Curve type: Linear, Origin: Exclude, Weighting: 1/x, Axis trans: None

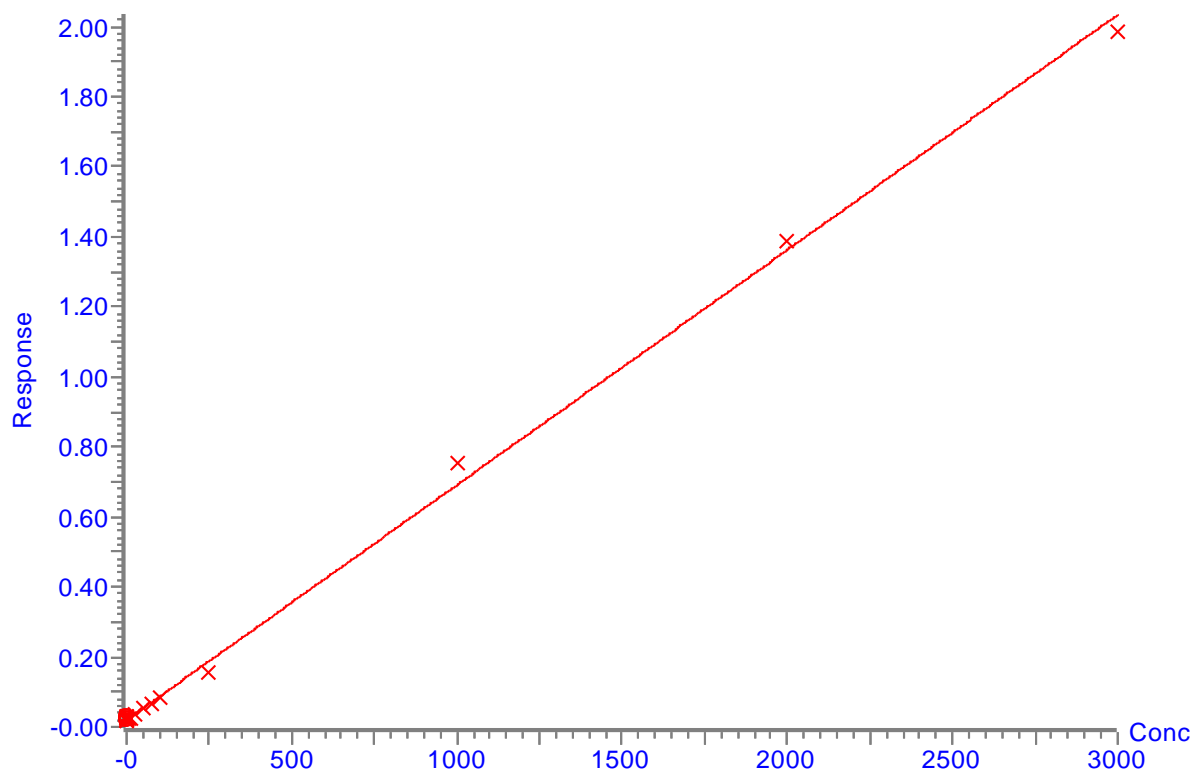

| Oxalic acid |                  |          |        |       |         |
|-------------|------------------|----------|--------|-------|---------|
|             | Std Conc (ng/mL) | Response | Conc.  | %Dev  | S/N     |
| 1           | 1                | 0.02     | 1      | -2.5  | 47.26   |
| 2           | 2.5              | 0.022    | 2.7    | 8.5   | 17.042  |
| 3           | 5                | 0.024    | 5.7    | 14.9  | 39.351  |
| 4           | 7.5              | 0.025    | 7.5    | -0.5  | 21.895  |
| 5           | 10               | 0.027    | 10.5   | 5     | 45.693  |
| 6           | 25               | 0.036    | 24.6   | -1.7  | 35.305  |
| 7           | 50               | 0.053    | 50.2   | 0.5   | 42.794  |
| 8           | 100              | 0.085    | 96.8   | -3.2  | 62.893  |
| 9           | 250              | 0.156    | 203.5  | -18.6 | 119.053 |
| 10          | 1000             | 0.752    | 1090.5 | 9.1   | 855.561 |
| 11          | 2000             | 1.386    | 2034.7 | 1.7   | 558.196 |
| 12          | 3000             | 1.988    | 2931.4 | -2.3  | 501.966 |



Compound name: Gamma-amino butyric acid

Correlation coefficient:  $r = 0.998691$ ,  $r^2 = 0.997383$

Calibration curve:  $0.00544558 * x + 0.00430084$

Response type: Internal Std ( Ref 2 ), Area \* ( IS Conc. / IS Area )

Curve type: Linear, Origin: Exclude, Weighting:  $1/x$ , Axis trans: None

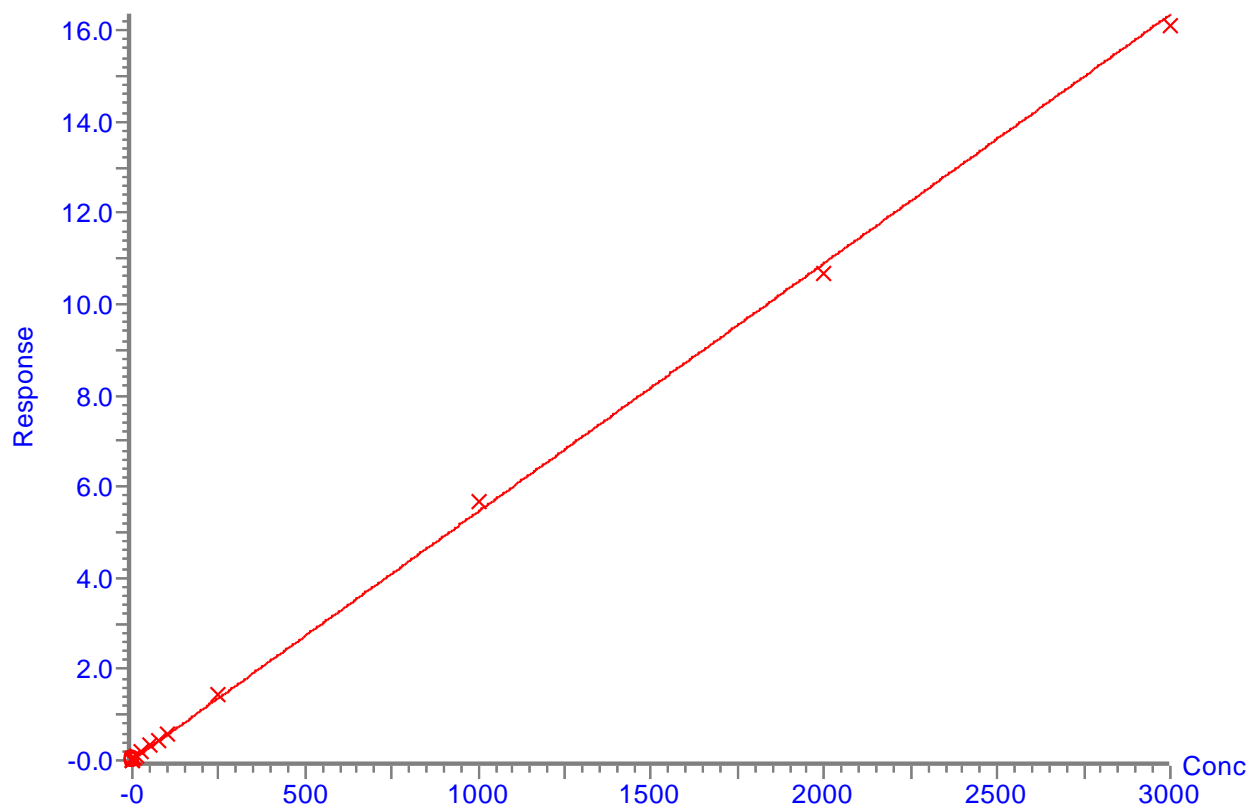

| GABA |                  |          |        |      |          |
|------|------------------|----------|--------|------|----------|
|      | Std Conc (ng/mL) | Response | Conc.  | %Dev | S/N      |
| 1    | 0.5              | 0.007    | 0.5    | -7.7 | 10.439   |
| 2    | 5                | 0.031    | 4.9    | -2.1 | 198.295  |
| 3    | 7.5              | 0.05     | 8.4    | 11.7 | 137.144  |
| 4    | 10               | 0.073    | 12.6   | 26   | 537.495  |
| 5    | 50               | 0.322    | 58.4   | 16.8 | 1193.15  |
| 6    | 75               | 0.452    | 82.2   | 9.6  | 456.198  |
| 7    | 100              | 0.567    | 103.3  | 3.3  | 1616.193 |
| 8    | 250              | 1.465    | 268.2  | 7.3  | 432.797  |
| 9    | 1000             | 5.65     | 1036.7 | 3.7  | 1310.672 |
| 10   | 2000             | 10.691   | 1962.4 | -1.9 | 4118.542 |
| 11   | 3000             | 16.108   | 2957.2 | -1.4 | 3097.238 |

Compound name: 3-Hydrobutyric acid

Correlation coefficient:  $r = 0.999336$ ,  $r^2 = 0.998673$

Calibration curve:  $0.00524439 * x + 0.209765$

Response type: Internal Std ( Ref 2 ), Area \* ( IS Conc. / IS Area )

Curve type: Linear, Origin: Exclude, Weighting: 1/x, Axis trans: None

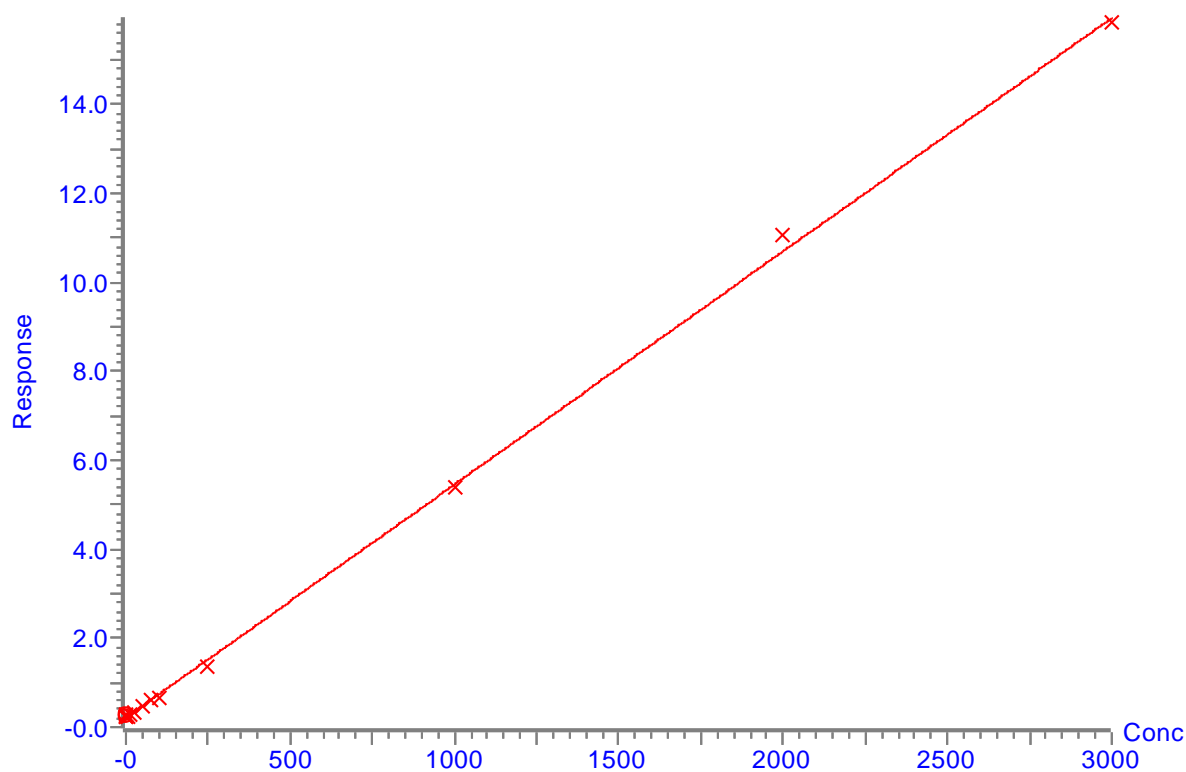

| 3-Hydroxy Butyric acid |                  |          |        |       |          |
|------------------------|------------------|----------|--------|-------|----------|
|                        | Std Conc (ng/mL) | Response | Conc.  | %Dev  | S/N      |
| 1                      | 1                | 0.215    | 1.1    | 7.9   | 714.481  |
| 2                      | 2.5              | 0.224    | 2.8    | 10.7  | 804.11   |
| 3                      | 5                | 0.237    | 5.2    | 3.6   | 450.592  |
| 4                      | 7.5              | 0.251    | 7.8    | 4     | 683.855  |
| 5                      | 10               | 0.264    | 10.3   | 2.9   | 441.343  |
| 6                      | 25               | 0.34     | 24.9   | -0.4  | 625.788  |
| 7                      | 50               | 0.46     | 47.7   | -4.6  | 509.187  |
| 8                      | 75               | 0.605    | 75.3   | 0.4   | 468.197  |
| 9                      | 100              | 0.658    | 85.4   | -14.6 | 780.848  |
| 10                     | 250              | 1.366    | 220.4  | -11.8 | 637.171  |
| 11                     | 1000             | 5.402    | 990    | -1    | 1083.468 |
| 12                     | 2000             | 11.075   | 2071.8 | 3.6   | 1454.768 |

Compound name: Threonine  
 Correlation coefficient:  $r = 0.998979$ ,  $r^2 = 0.997959$   
 Calibration curve:  $0.000456408 * x + 0.00514902$   
 Response type: Internal Std ( Ref 2 ), Area \* ( IS Conc. / IS Area )  
 Curve type: Linear, Origin: Exclude, Weighting: 1/x, Axis trans: None

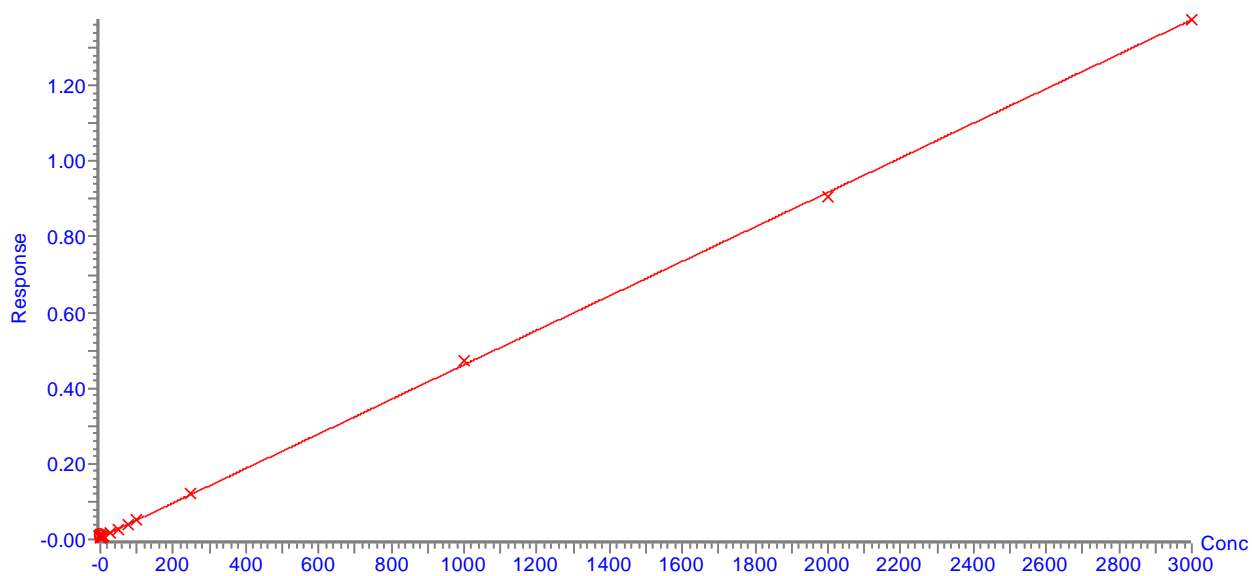

| Threonine |                  |          |        |      |         |
|-----------|------------------|----------|--------|------|---------|
|           | Std Conc (ng/mL) | Response | Conc.  | %Dev | S/N     |
| 1         | 1                | 0.006    | 1.1    | 7.4  | 13.718  |
| 2         | 2.5              | 0.006    | 2.8    | 12.4 | 20.776  |
| 3         | 5                | 0.007    | 4.7    | -5.9 | 17.717  |
| 4         | 7.5              | 0.009    | 8.1    | 8    | 34.287  |
| 5         | 25               | 0.017    | 26     | 4.1  | 25.663  |
| 6         | 50               | 0.026    | 46.6   | -6.9 | 15.781  |
| 7         | 75               | 0.037    | 69.8   | -6.9 | 81.237  |
| 8         | 100              | 0.054    | 106.6  | 6.6  | 48.212  |
| 9         | 250              | 0.123    | 258.5  | 3.4  | 68.792  |
| 10        | 1000             | 0.472    | 1023.8 | 2.4  | 170.589 |
| 11        | 2000             | 0.904    | 1969.6 | -1.5 | 92.007  |
| 12        | 3000             | 1.373    | 2996.5 | -0.1 | 185.266 |

Compound name: Cysteine

Correlation coefficient:  $r = 0.999712$ ,  $r^2 = 0.999425$

Calibration curve:  $0.000130827 \cdot x + 0.000121304$

Response type: Internal Std ( Ref 2 ), Area \* ( IS Conc. / IS Area )

Curve type: Linear, Origin: Exclude, Weighting:  $1/x$ , Axis trans: None

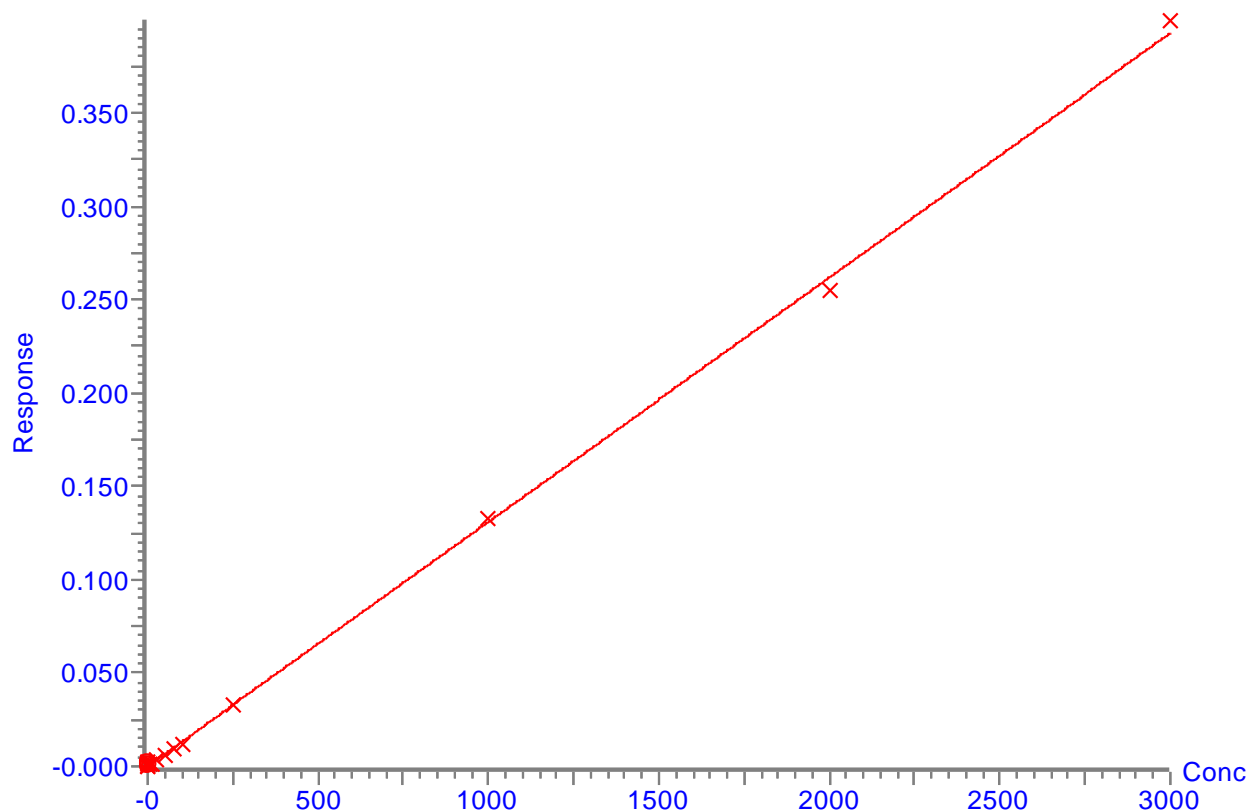

| Cysteine |                  |          |        |      |        |
|----------|------------------|----------|--------|------|--------|
|          | Std Conc (ng/mL) | Response | Conc.  | %Dev | S/N    |
| 1        | 1                | 0        | 1.3    | 28   | 1.753  |
| 2        | 2.5              | 0        | 2.8    | 11.3 | 1.833  |
| 3        | 10               | 0.001    | 9.2    | -7.7 | 5.696  |
| 4        | 25               | 0.003    | 22.7   | -9.1 | 5.706  |
| 5        | 50               | 0.006    | 46     | -8   | 5.855  |
| 6        | 75               | 0.01     | 71.9   | -4.1 | 14.601 |
| 7        | 100              | 0.012    | 92.1   | -7.9 | 21.387 |
| 8        | 250              | 0.033    | 253.9  | 1.6  | 32.943 |
| 9        | 1000             | 0.132    | 1011.2 | 1.1  | 53.516 |
| 10       | 2000             | 0.255    | 1950.5 | -2.5 | 54.127 |
| 11       | 3000             | 0.399    | 3051.8 | 1.7  | 41.875 |

Compound name: Pyroglutamic acid

Correlation coefficient:  $r = 0.999522$ ,  $r^2 = 0.999044$

Calibration curve:  $0.000244797 \cdot x + 0.00139121$

Response type: Internal Std ( Ref 2 ), Area \* ( IS Conc. / IS Area )

Curve type: Linear, Origin: Exclude, Weighting: 1/x, Axis trans: None

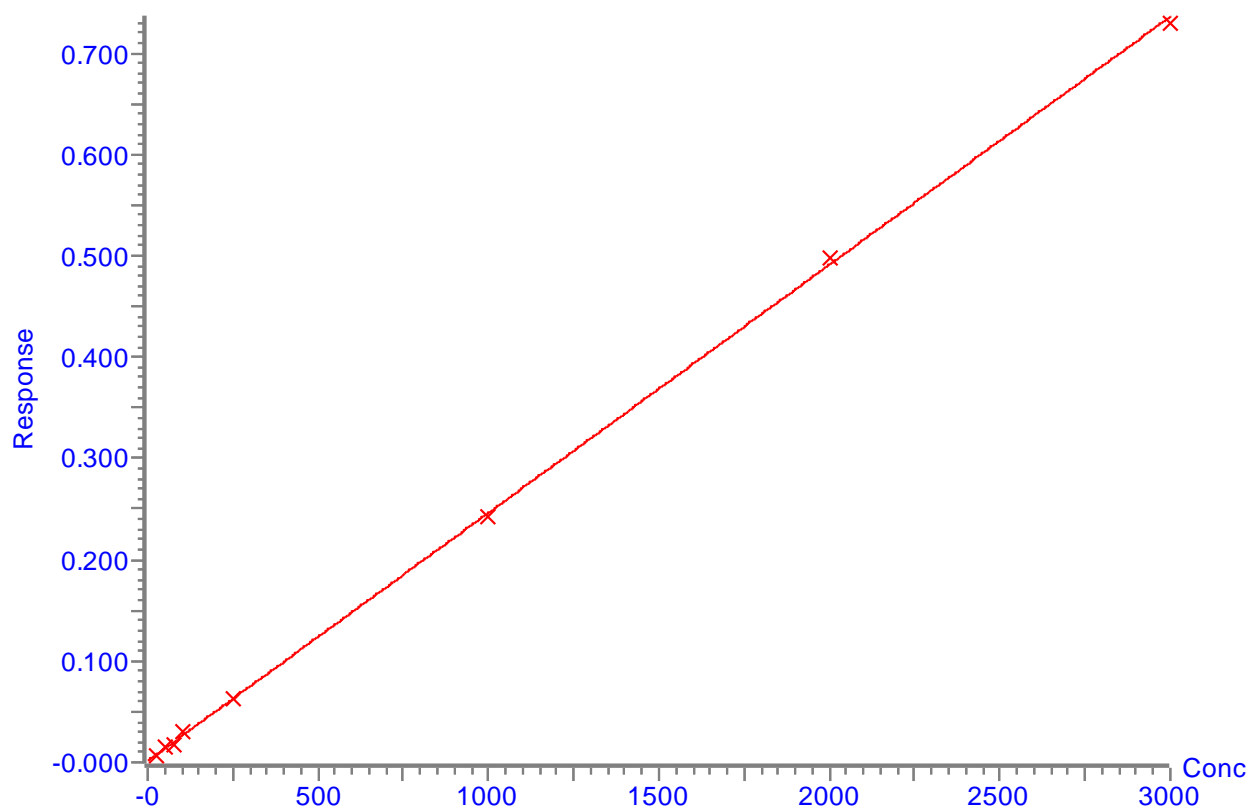

| Pyroglutamic acid |                  |          |        |       |         |
|-------------------|------------------|----------|--------|-------|---------|
|                   | Std Conc (ng/mL) | Response | Conc.  | %Dev  | S/N     |
| 1                 | 25               | 0.007    | 20.9   | -16.3 | 11.172  |
| 2                 | 50               | 0.015    | 55.4   | 10.9  | 11.085  |
| 3                 | 75               | 0.018    | 67.1   | -10.5 | 14.136  |
| 4                 | 100              | 0.03     | 115.6  | 15.6  | 41.615  |
| 5                 | 250              | 0.063    | 253.5  | 1.4   | 17.663  |
| 6                 | 1000             | 0.242    | 983.8  | -1.6  | 129.024 |
| 7                 | 2000             | 0.499    | 2030.9 | 1.5   | 167.783 |
| 8                 | 3000             | 0.729    | 2972.9 | -0.9  | 141.764 |

Compound name: Cis-Aconitic acid  
 Correlation coefficient:  $r = 0.999762$ ,  $r^2 = 0.999525$   
 Calibration curve:  $0.071893 \cdot x + 0.328922$   
 Response type: Internal Std ( Ref 2 ), Area \* ( IS Conc. / IS Area )  
 Curve type: Linear, Origin: Exclude, Weighting: 1/x, Axis trans: None

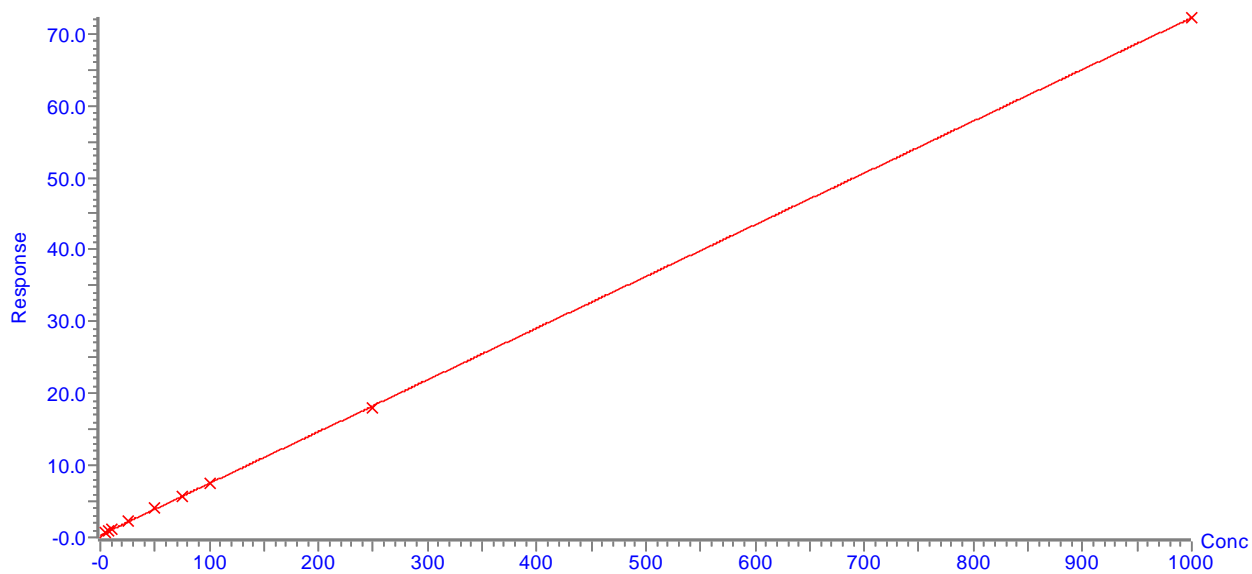

| Cis-aconitic acid |                  |          |       |       |          |
|-------------------|------------------|----------|-------|-------|----------|
|                   | Std Conc (ng/mL) | Response | Conc. | %Dev  | S/N      |
| 1                 | 5                | 0.618    | 4     | -19.5 | 262.676  |
| 2                 | 7.5              | 0.877    | 7.6   | 1.6   | 421.364  |
| 3                 | 10               | 1.101    | 10.7  | 7.4   | 347.242  |
| 4                 | 25               | 2.212    | 26.2  | 4.8   | 1174.904 |
| 5                 | 50               | 4.194    | 53.8  | 7.5   | 1201.202 |
| 6                 | 75               | 5.662    | 74.2  | -1.1  | 2392.026 |
| 7                 | 100              | 7.578    | 100.8 | 0.8   | 2716.852 |
| 8                 | 250              | 18.058   | 246.6 | -1.4  | 2669.967 |
| 9                 | 1000             | 72.118   | 998.5 | -0.1  | 1408.557 |

Compound name: Citric acid/isocitric acid

Correlation coefficient:  $r = 0.999128$ ,  $r^2 = 0.998257$

Calibration curve:  $0.00944203 * x + 0.0834325$

Response type: Internal Std ( Ref 2 ), Area \* ( IS Conc. / IS Area )

Curve type: Linear, Origin: Exclude, Weighting: 1/x, Axis trans: None

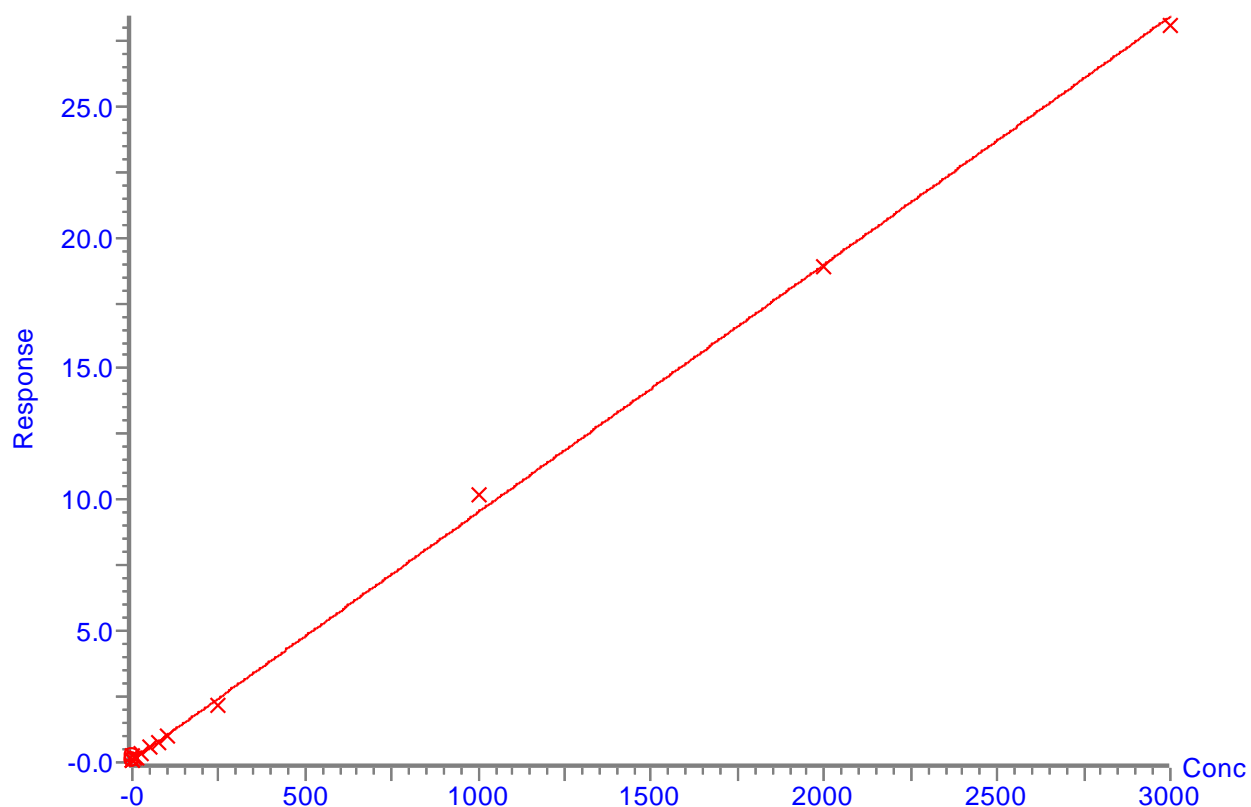

| Citric acid/Isocitric acid |                  |          |        |       |          |
|----------------------------|------------------|----------|--------|-------|----------|
|                            | Std Conc (ng/mL) | Response | Conc.  | %Dev  | S/N      |
| 1                          | 5                | 0.136    | 5.6    | 12.1  | 131.562  |
| 2                          | 7.5              | 0.158    | 7.9    | 6     | 302.151  |
| 3                          | 10               | 0.184    | 10.7   | 6.8   | 193.272  |
| 4                          | 25               | 0.307    | 23.7   | -5.1  | 152.824  |
| 5                          | 50               | 0.555    | 49.9   | -0.2  | 309.744  |
| 6                          | 75               | 0.791    | 75     | 0     | 662.182  |
| 7                          | 100              | 1.016    | 98.8   | -1.2  | 658.932  |
| 8                          | 250              | 2.198    | 223.9  | -10.4 | 851.186  |
| 9                          | 1000             | 10.162   | 1067.4 | 6.7   | 1996.178 |
| 10                         | 2000             | 18.889   | 1991.7 | -0.4  | 3148.883 |
| 11                         | 3000             | 28.106   | 2967.9 | -1.1  | 1552.699 |

Compound name: Glutaconic acid  
 Correlation coefficient:  $r = 0.997375$ ,  $r^2 = 0.994756$   
 Calibration curve:  $2.34841 \cdot x + -24.7825$   
 Response type: Internal Std ( Ref 9 ), Area \* ( IS Conc. / IS Area )  
 Curve type: Linear, Origin: Exclude, Weighting: 1/x, Axis trans: None

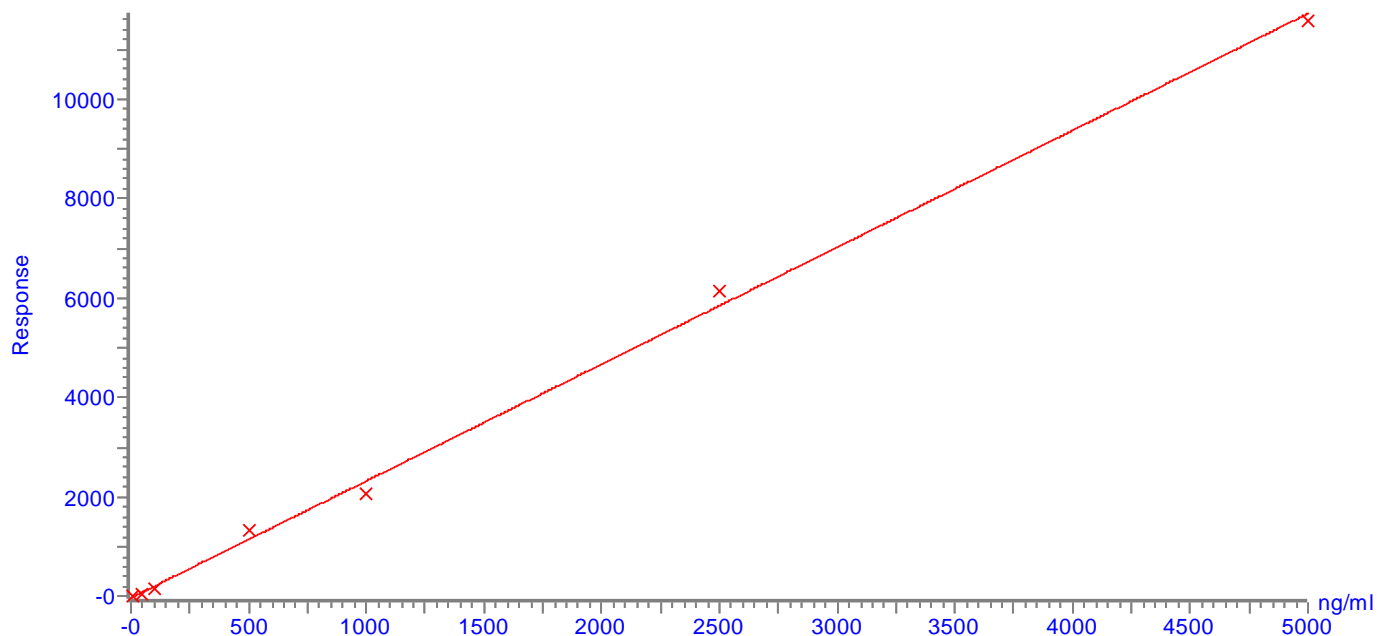

| Glutaconic acid |                  |             |         |       |          |
|-----------------|------------------|-------------|---------|-------|----------|
|                 | Std Conc (ng/mL) | Response    | Conc.   | %Dev  | S/N      |
| 1               | 10               | 10.540981   | 15.04   | 50.4  | 2564.754 |
| 2               | 50               | 48.524753   | 31.22   | -37.6 | 3055.709 |
| 3               | 100              | 159.631071  | 78.53   | -21.5 | 1530.47  |
| 4               | 500              | 1336.1956   | 579.53  | 15.9  | 889.113  |
| 5               | 1000             | 2061.873038 | 888.54  | -11.1 | 1412.777 |
| 6               | 2500             | 6142.626038 | 2626.20 | 5     | 3393.81  |
| 7               | 5000             | 11578.58322 | 4940.94 | -1.2  | 3629.895 |



Compound name: 4-Hydroxy proline\_1

Correlation coefficient:  $r = 0.995351$ ,  $r^2 = 0.990724$

Calibration curve:  $0.00443723 * x + 0.0118856$

Response type: Internal Std ( Ref 2 ), Area \* ( IS Conc. / IS Area )

Curve type: Linear, Origin: Exclude, Weighting: 1/x, Axis trans: None

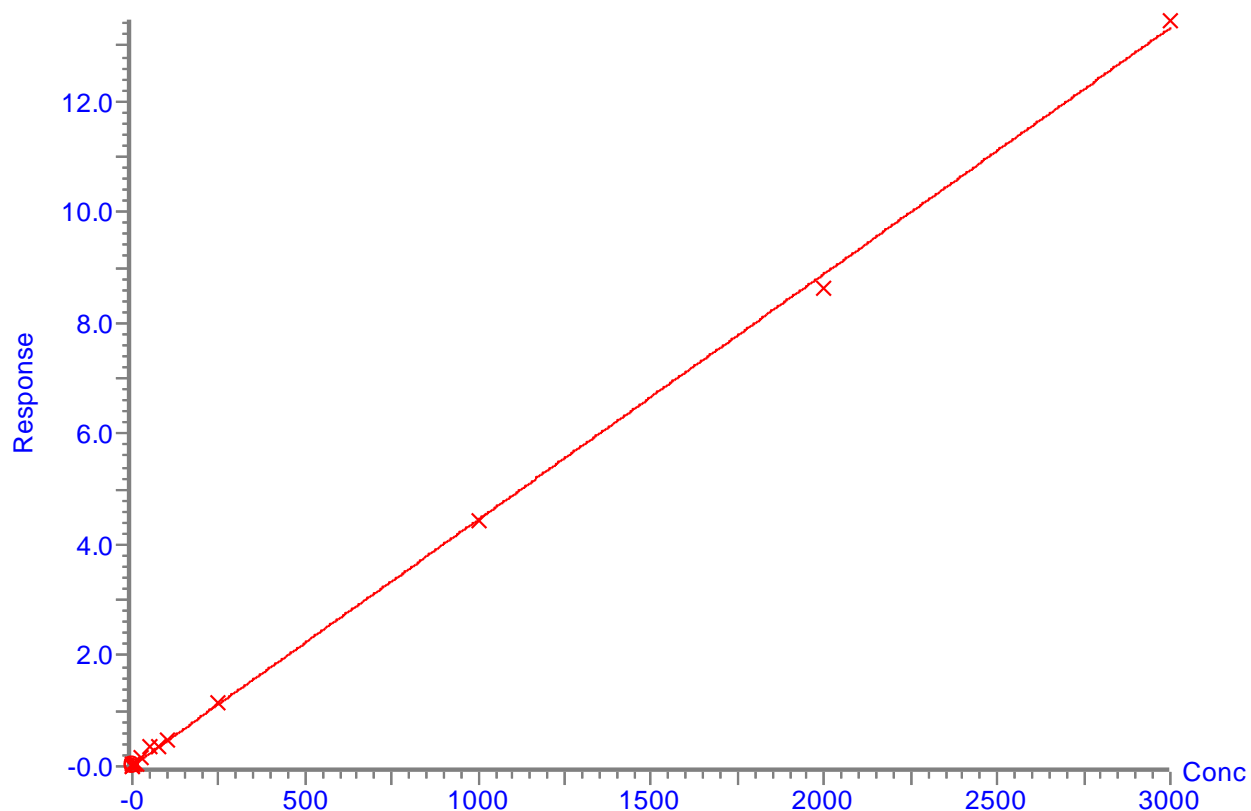

| 4-Hydroxy proline |                  |          |        |      |          |
|-------------------|------------------|----------|--------|------|----------|
|                   | Std Conc (ng/mL) | Response | Conc.  | %Dev | S/N      |
| 1                 | 0.5              | 0.014    | 0.5    | 4.4  | 11.07    |
| 2                 | 5                | 0.035    | 5.2    | 3.4  | 78.973   |
| 3                 | 7.5              | 0.048    | 8.1    | 7.4  | 66.68    |
| 4                 | 10               | 0.057    | 10.1   | 1.2  | 126.872  |
| 5                 | 75               | 0.363    | 79.1   | 5.5  | 669.205  |
| 6                 | 100              | 0.461    | 101.2  | 1.2  | 462.217  |
| 7                 | 250              | 1.141    | 254.5  | 1.8  | 1350.353 |
| 8                 | 1000             | 4.412    | 991.7  | -0.8 | 2251.292 |
| 9                 | 2000             | 8.639    | 1944.3 | -2.8 | 1613.748 |
| 10                | 3000             | 13.453   | 3029.3 | 1    | 1397.954 |

Compound name: Asparagine

Correlation coefficient:  $r = 0.997806$ ,  $r^2 = 0.995618$

Calibration curve:  $0.00278259 * x + 0.00729158$

Response type: Internal Std ( Ref 2 ), Area \* ( IS Conc. / IS Area )

Curve type: Linear, Origin: Exclude, Weighting:  $1/x$ , Axis trans: None

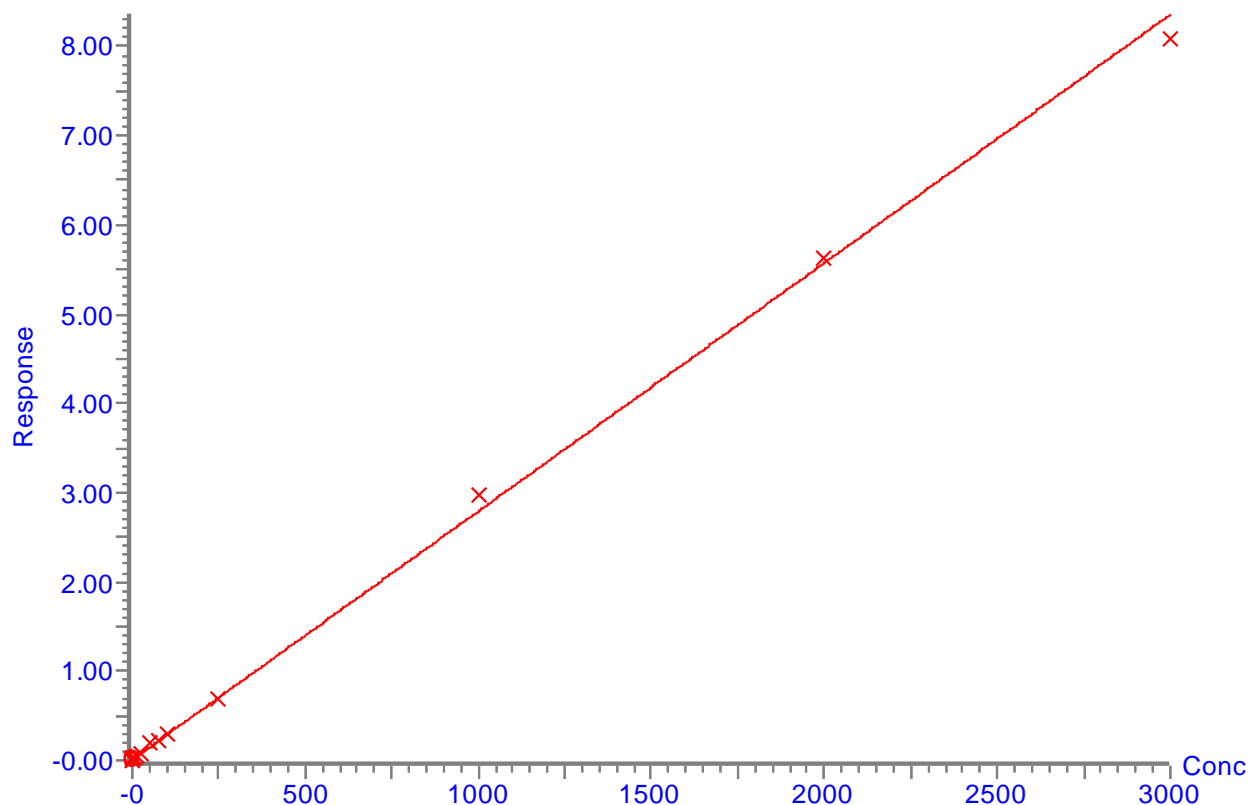

| Asparagine |                  |          |        |      |          |
|------------|------------------|----------|--------|------|----------|
|            | Std Conc (ng/mL) | Response | Conc.  | %Dev | S/N      |
| 1          | 1                | 0.01     | 0.9    | -8.3 | 16.588   |
| 2          | 5                | 0.022    | 5.2    | 3.7  | 18.472   |
| 3          | 7.5              | 0.026    | 6.9    | -8.1 | 140.86   |
| 4          | 10               | 0.038    | 11     | 10.4 | 57.269   |
| 5          | 25               | 0.082    | 26.8   | 7.3  | 186.195  |
| 6          | 50               | 0.193    | 66.7   | 33.4 | 413.956  |
| 7          | 75               | 0.229    | 79.6   | 6.1  | 325.61   |
| 8          | 100              | 0.292    | 102.4  | 2.4  | 271.221  |
| 9          | 250              | 0.681    | 242.2  | -3.1 | 686.278  |
| 10         | 1000             | 2.981    | 1068.6 | 6.9  | 1691.112 |
| 11         | 2000             | 5.621    | 2017.3 | 0.9  | 1242.195 |
| 12         | 3000             | 8.081    | 2901.4 | -3.3 | 1112.973 |

Compound name: Ornithine  
 Correlation coefficient:  $r = 0.998451$ ,  $r^2 = 0.996905$   
 Calibration curve:  $0.00703109 * x + 0.0208763$   
 Response type: Internal Std ( Ref 9 ), Area \* ( IS Conc. / IS Area )  
 Curve type: Linear, Origin: Exclude, Weighting: 1/x, Axis trans: None

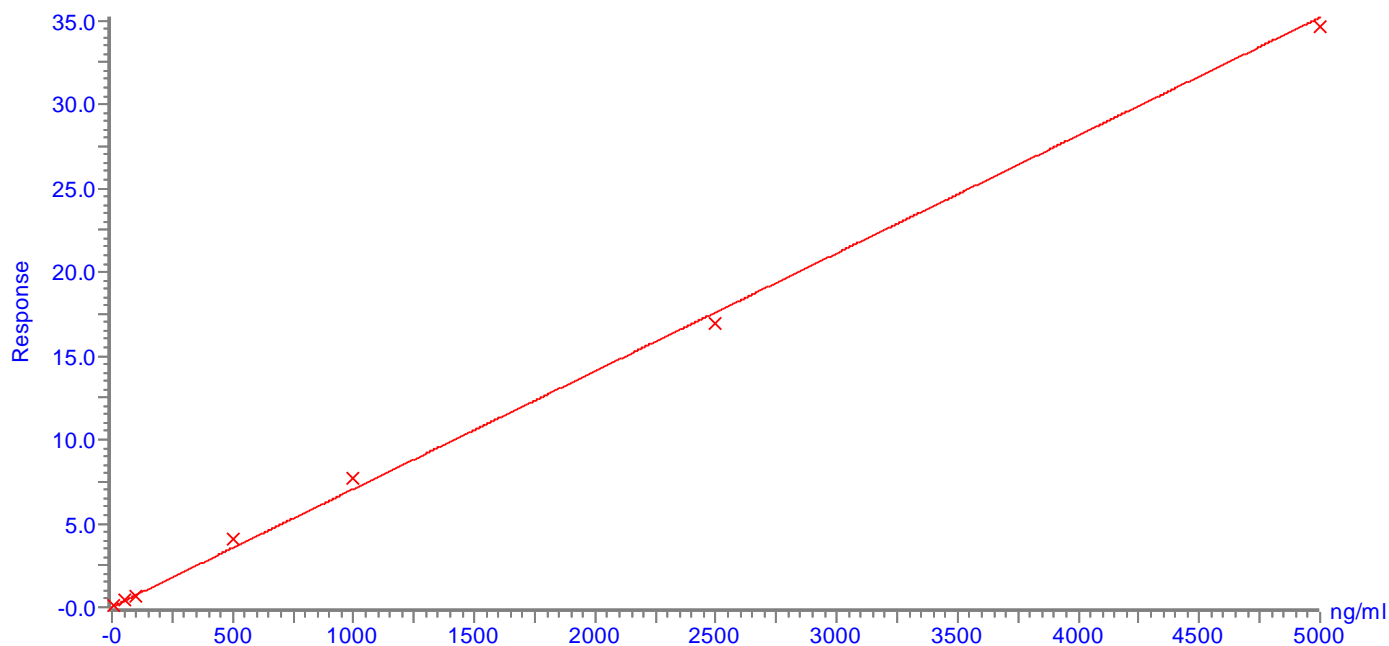

| Ornithine |                  |           |         |       |         |
|-----------|------------------|-----------|---------|-------|---------|
|           | Std Conc (ng/mL) | Response  | Conc.   | %Dev  | S/N     |
| 1         | 10               | 0.078005  | 8.13    | -18.7 | 81.35   |
| 2         | 50               | 0.395586  | 53.29   | 6.6   | 65.633  |
| 3         | 100              | 0.667839  | 92.01   | -8    | 49.484  |
| 4         | 500              | 4.079116  | 577.18  | 15.4  | 65.398  |
| 5         | 1000             | 7.745784  | 1098.68 | 9.9   | 55.301  |
| 6         | 2500             | 16.976087 | 2411.46 | -3.5  | 59.303  |
| 7         | 5000             | 34.608548 | 4919.24 | -1.6  | 156.764 |

Compound name: Glutaric acid

Correlation coefficient:  $r = 0.999083$ ,  $r^2 = 0.998166$

Calibration curve:  $0.00278281 * x + 0.00400399$

Response type: Internal Std ( Ref 2 ), Area \* ( IS Conc. / IS Area )

Curve type: Linear, Origin: Exclude, Weighting: 1/x, Axis trans: None

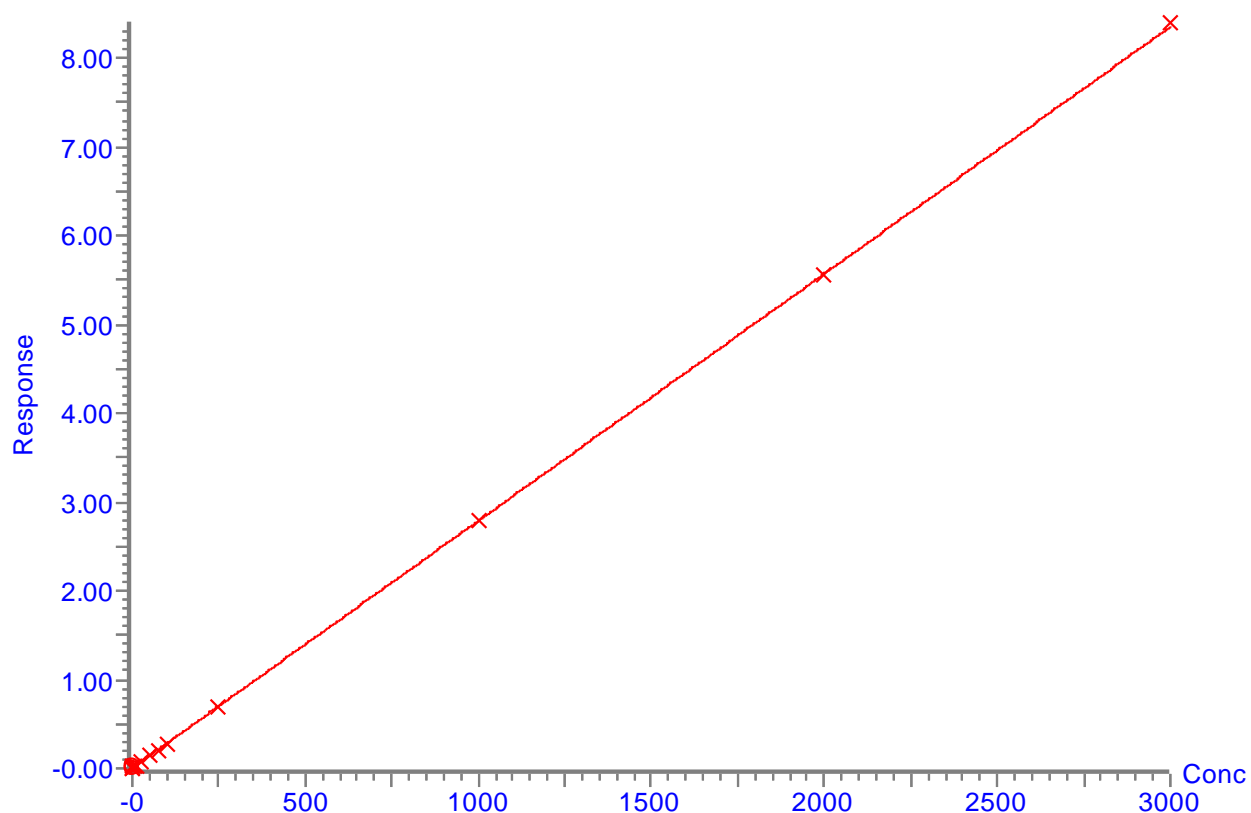

| Glutaric acid |                  |          |        |       |          |
|---------------|------------------|----------|--------|-------|----------|
|               | Std Conc (ng/mL) | Response | Conc.  | %Dev  | S/N      |
| 1             | 0.5              | 0.005    | 0.4    | -14.2 | 18.001   |
| 2             | 1                | 0.007    | 1.2    | 20.3  | 21.331   |
| 3             | 5                | 0.02     | 5.7    | 13.7  | 29.349   |
| 4             | 7.5              | 0.025    | 7.7    | 2.5   | 39.328   |
| 5             | 10               | 0.036    | 11.4   | 13.8  | 95.076   |
| 6             | 25               | 0.071    | 24.2   | -3.3  | 147.115  |
| 7             | 50               | 0.137    | 47.9   | -4.1  | 101.843  |
| 8             | 100              | 0.279    | 98.6   | -1.4  | 271.273  |
| 9             | 250              | 0.682    | 243.7  | -2.5  | 588.313  |
| 10            | 1000             | 2.793    | 1002.2 | 0.2   | 1175.049 |
| 11            | 2000             | 5.552    | 1993.8 | -0.3  | 589.023  |
| 12            | 3000             | 8.399    | 3016.9 | 0.6   | 862.082  |

Compound name: Adipic acid

Correlation coefficient:  $r = 0.998075$ ,  $r^2 = 0.996154$

Calibration curve:  $0.0093574 * x + 0.036464$

Response type: Internal Std ( Ref 2 ), Area \* ( IS Conc. / IS Area )

Curve type: Linear, Origin: Exclude, Weighting: 1/x, Axis trans: None

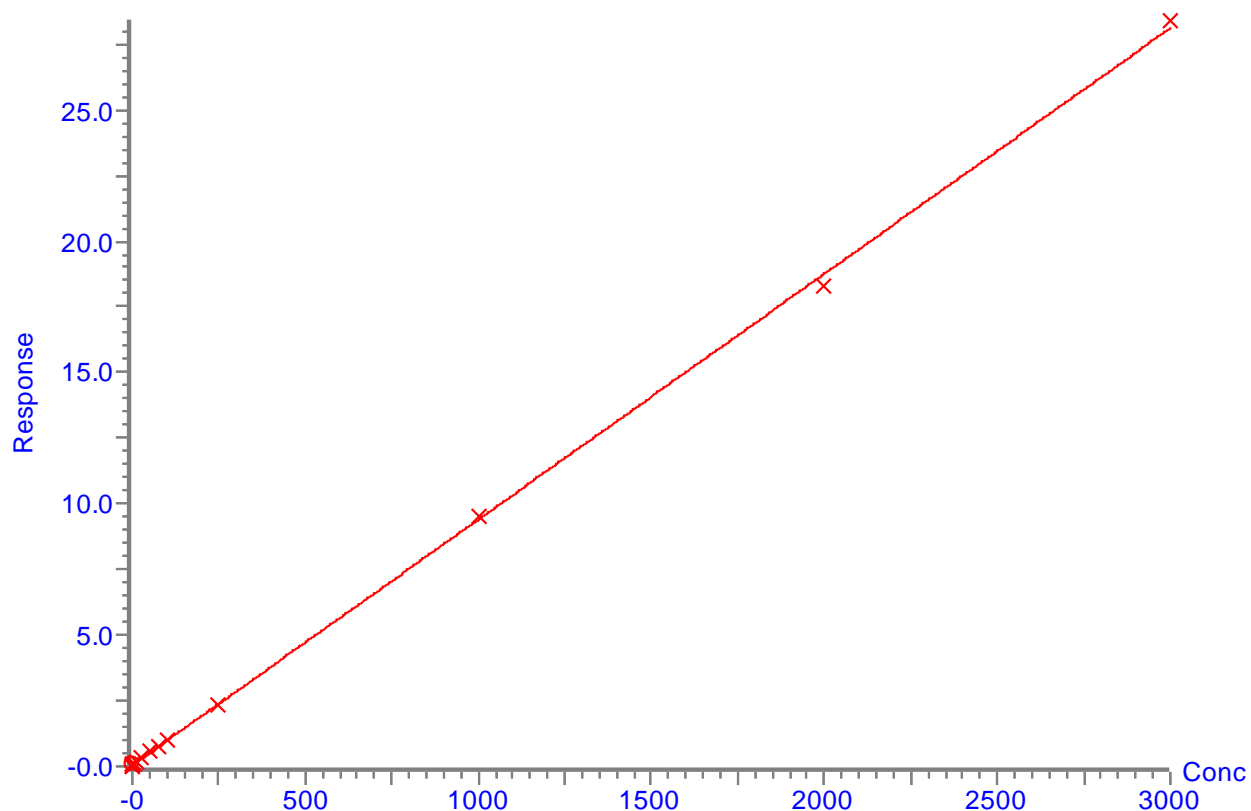

| Adipic acid |                  |          |        |      |          |
|-------------|------------------|----------|--------|------|----------|
|             | Std Conc (ng/mL) | Response | Conc.  | %Dev | S/N      |
| 1           | 5                | 0.087    | 5.4    | 8.1  | 165.821  |
| 2           | 7.5              | 0.109    | 7.8    | 3.8  | 180.741  |
| 3           | 10               | 0.135    | 10.6   | 5.6  | 348.563  |
| 4           | 25               | 0.298    | 28     | 11.9 | 608.109  |
| 5           | 50               | 0.551    | 55     | 10   | 1766.288 |
| 6           | 75               | 0.719    | 73     | -2.7 | 1308.082 |
| 7           | 100              | 1.027    | 105.8  | 5.8  | 1050.058 |
| 8           | 250              | 2.36     | 248.3  | -0.7 | 3313.35  |
| 9           | 1000             | 9.511    | 1012.5 | 1.3  | 5591.138 |
| 10          | 2000             | 18.303   | 1952.1 | -2.4 | 3789.475 |
| 11          | 3000             | 28.394   | 3030.5 | 1    | 9399.621 |

Compound name: Glutamic acid\_366

Correlation coefficient:  $r = 0.995877$ ,  $r^2 = 0.991772$

Calibration curve:  $0.0132351 * x + 2.4606$

Response type: Internal Std ( Ref 2 ), Area \* ( IS Conc. / IS Area )

Curve type: Linear, Origin: Exclude, Weighting:  $1/x$ , Axis trans: None

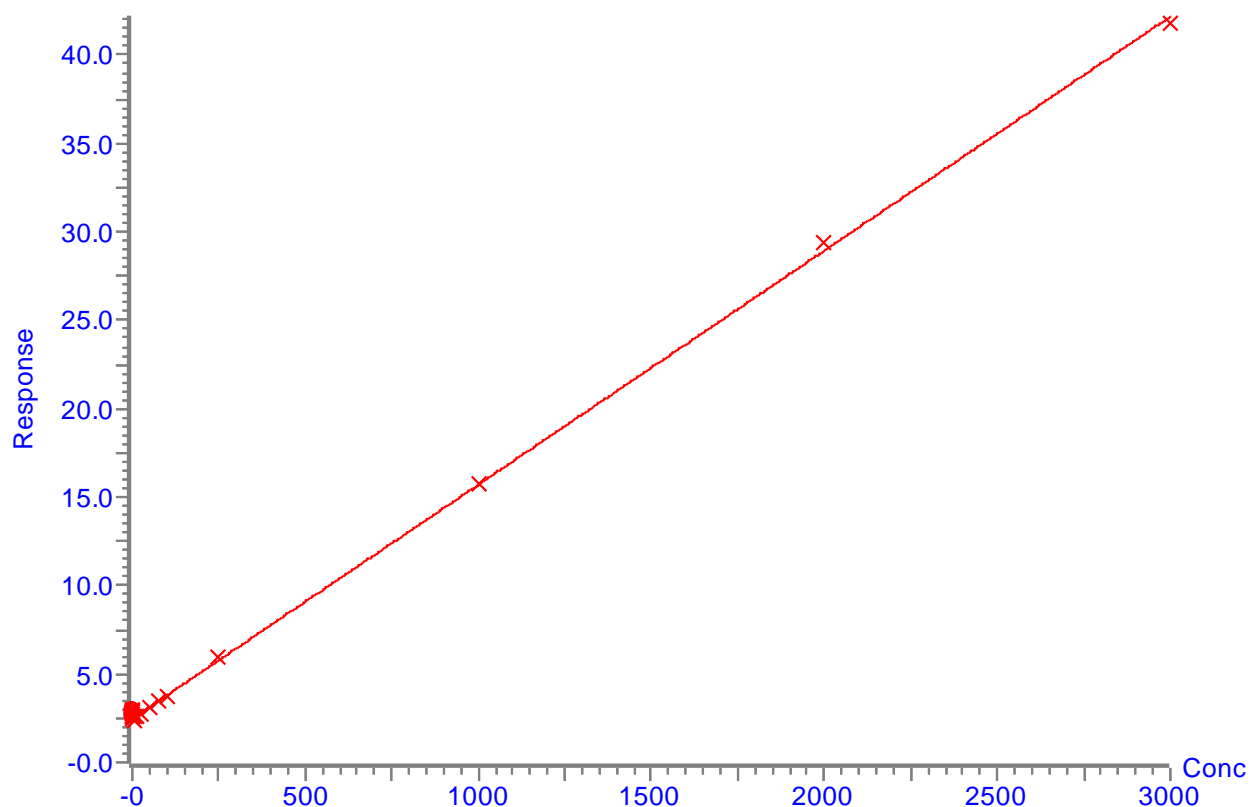

| Glutamic acid |                  |          |        |      |          |
|---------------|------------------|----------|--------|------|----------|
|               | Std Conc (ng/mL) | Response | Conc.  | %Dev | S/N      |
| 1             | 7.5              | 2.572    | 8.4    | 11.9 | 2351.609 |
| 2             | 10               | 2.616    | 11.7   | 17.3 | 2674.701 |
| 3             | 25               | 2.789    | 24.8   | -0.9 | 3141.115 |
| 4             | 50               | 3.074    | 46.3   | -7.3 | 2203.972 |
| 5             | 75               | 3.455    | 75.1   | 0.2  | 2953.287 |
| 6             | 100              | 3.752    | 97.6   | -2.4 | 3152.474 |
| 7             | 250              | 5.971    | 265.2  | 6.1  | 3196.995 |
| 8             | 1000             | 15.728   | 1002.4 | 0.2  | 5718.103 |
| 9             | 2000             | 29.385   | 2034.3 | 1.7  | 5983.388 |
| 10            | 3000             | 41.75    | 2968.6 | -1   | 5562.169 |

Compound name: Mevalonic acid

Correlation coefficient:  $r = 0.999014$ ,  $r^2 = 0.998030$

Calibration curve:  $0.00937525 * x + 0.00491091$

Response type: Internal Std ( Ref 2 ), Area \* ( IS Conc. / IS Area )

Curve type: Linear, Origin: Exclude, Weighting: 1/x, Axis trans: None

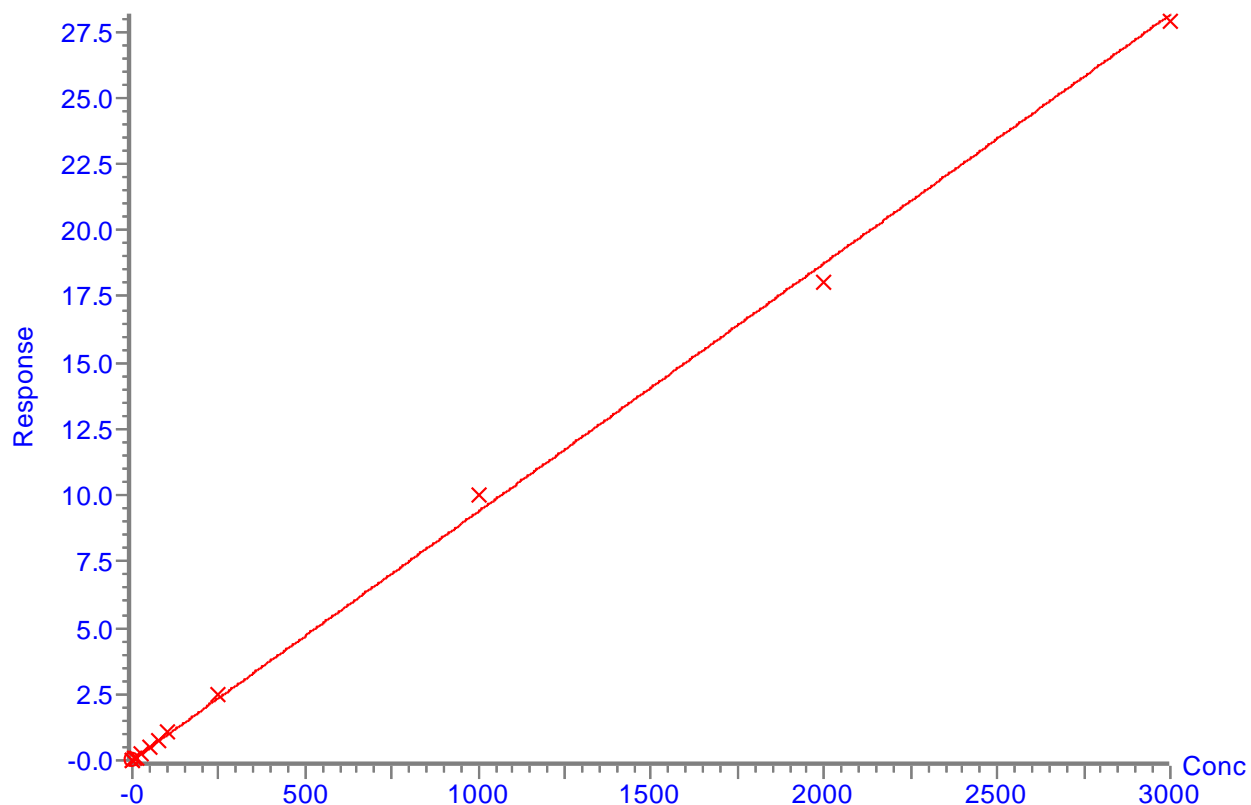

| Mevalonic acid |                  |          |        |      |          |
|----------------|------------------|----------|--------|------|----------|
|                | Std Conc (ng/mL) | Response | Conc.  | %Dev | S/N      |
| 1              | 5                | 0.053    | 5.2    | 3.1  | 58.476   |
| 2              | 7.5              | 0.083    | 8.3    | 11.2 | 77.254   |
| 3              | 10               | 0.101    | 10.2   | 2.4  | 85.062   |
| 4              | 25               | 0.255    | 26.7   | 6.7  | 224.564  |
| 5              | 50               | 0.474    | 50.1   | 0.1  | 395.52   |
| 6              | 75               | 0.727    | 77     | 2.7  | 855.387  |
| 7              | 100              | 1.045    | 110.9  | 10.9 | 595.855  |
| 8              | 250              | 2.5      | 266.2  | 6.5  | 980.161  |
| 9              | 1000             | 10.002   | 1066.4 | 6.6  | 5317.859 |
| 10             | 2000             | 18.051   | 1924.8 | -3.8 | 4089.659 |
| 11             | 3000             | 27.912   | 2976.6 | -0.8 | 5951.023 |

Compound name: Hydroxy glutaric acid\_209

Correlation coefficient:  $r = 0.999213$ ,  $r^2 = 0.998427$

Calibration curve:  $0.00432507 * x + 0.00487617$

Response type: Internal Std ( Ref 2 ), Area \* ( IS Conc. / IS Area )

Curve type: Linear, Origin: Exclude, Weighting: 1/x, Axis trans: None

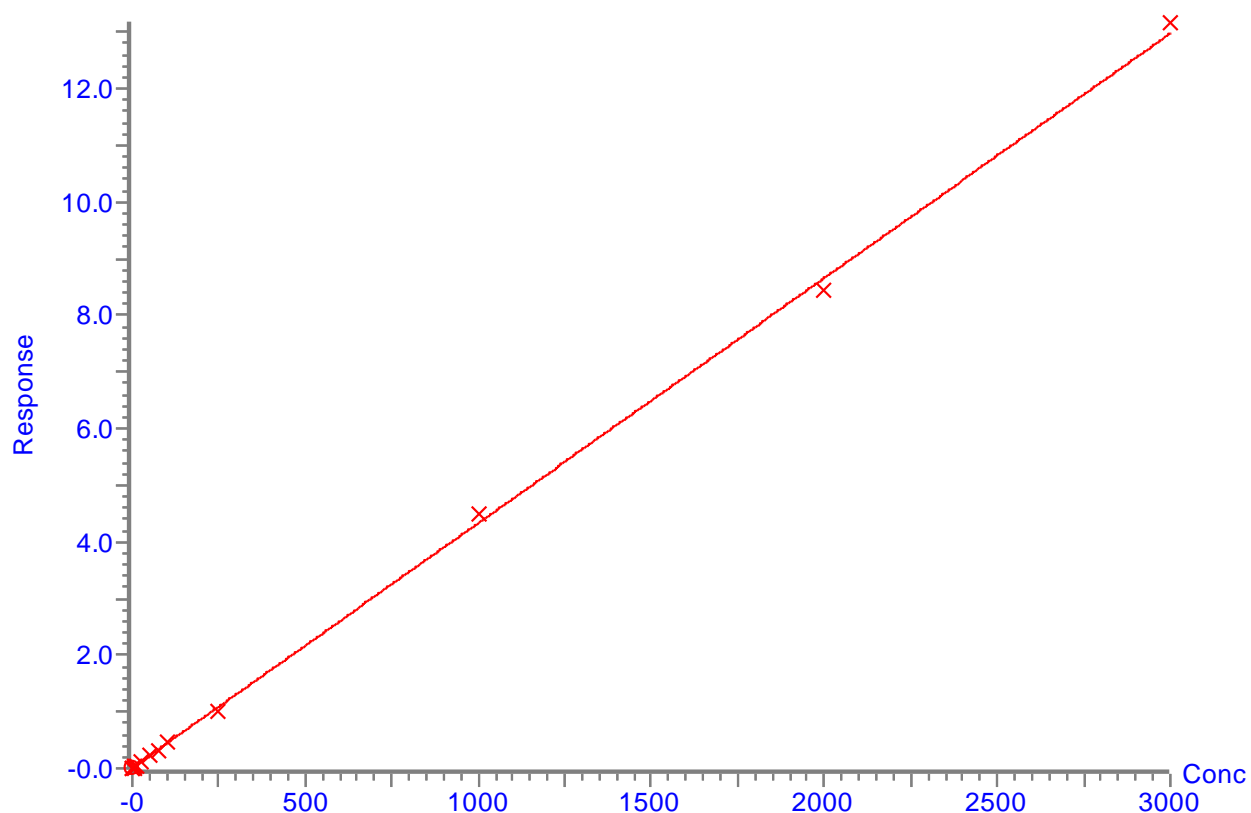

| 2-Hydroxy glutaric acid |                  |          |        |       |           |
|-------------------------|------------------|----------|--------|-------|-----------|
|                         | Std Conc (ng/mL) | Response | Conc.  | %Dev  | S/N       |
| 1                       | 0.1              | 0.005    | 0.1    | -12.1 | 21.875    |
| 2                       | 1                | 0.009    | 1      | 0.9   | 39.404    |
| 3                       | 2.5              | 0.014    | 2.2    | -11.1 | 34.338    |
| 4                       | 7.5              | 0.035    | 7.1    | -5.9  | 49.336    |
| 5                       | 10               | 0.043    | 8.8    | -11.7 | 62.991    |
| 6                       | 50               | 0.22     | 49.7   | -0.7  | 454.623   |
| 7                       | 75               | 0.3      | 68.2   | -9.1  | 654.408   |
| 8                       | 100              | 0.466    | 106.5  | 6.5   | 879.274   |
| 9                       | 250              | 1.013    | 233    | -6.8  | 2217.616  |
| 10                      | 1000             | 4.493    | 1037.6 | 3.8   | 21505.275 |
| 11                      | 2000             | 8.424    | 1946.5 | -2.7  | 32870.682 |
| 12                      | 3000             | 13.167   | 3043.2 | 1.4   | 17852.673 |



Compound name: Dihydroorotic acid  
 Correlation coefficient:  $r = 0.999571$ ,  $r^2 = 0.999142$   
 Calibration curve:  $0.00687943 * x + 0.709507$   
 Response type: Internal Std ( Ref 2 ), Area \* ( IS Conc. / IS Area )  
 Curve type: Linear, Origin: Exclude, Weighting: 1/x, Axis trans: None

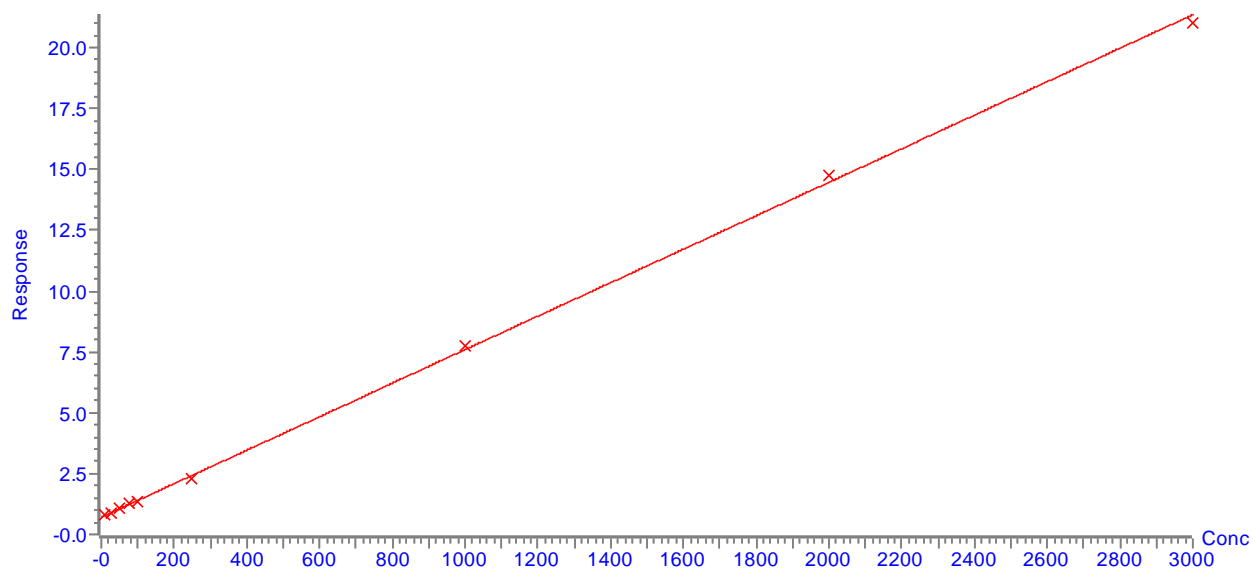

| Dihydroorotic acid |                  |          |        |      |          |
|--------------------|------------------|----------|--------|------|----------|
|                    | Std Conc (ng/mL) | Response | Conc.  | %Dev | S/N      |
| 1                  | 10               | 0.781    | 10.3   | 3.5  | 1432.641 |
| 2                  | 25               | 0.868    | 23     | -8.1 | 1102.432 |
| 3                  | 50               | 1.068    | 52.1   | 4.1  | 1668.92  |
| 4                  | 75               | 1.275    | 82.3   | 9.7  | 1280.8   |
| 5                  | 100              | 1.374    | 96.6   | -3.4 | 1012.984 |
| 6                  | 250              | 2.276    | 227.8  | -8.9 | 1184.004 |
| 7                  | 1000             | 7.775    | 1027.1 | 2.7  | 1998.545 |
| 8                  | 2000             | 14.727   | 2037.6 | 1.9  | 2702.132 |
| 9                  | 3000             | 21.027   | 2953.3 | -1.6 | 3671.185 |

Compound name: 2,2-dimethyl glutaric acid  
 Correlation coefficient:  $r = 0.998795$ ,  $r^2 = 0.997591$   
 Calibration curve:  $0.0356825 \cdot x + -0.38609$   
 Response type: Internal Std ( Ref 9 ), Area \* ( IS Conc. / IS Area )  
 Curve type: Linear, Origin: Exclude, Weighting: 1/x, Axis trans: None

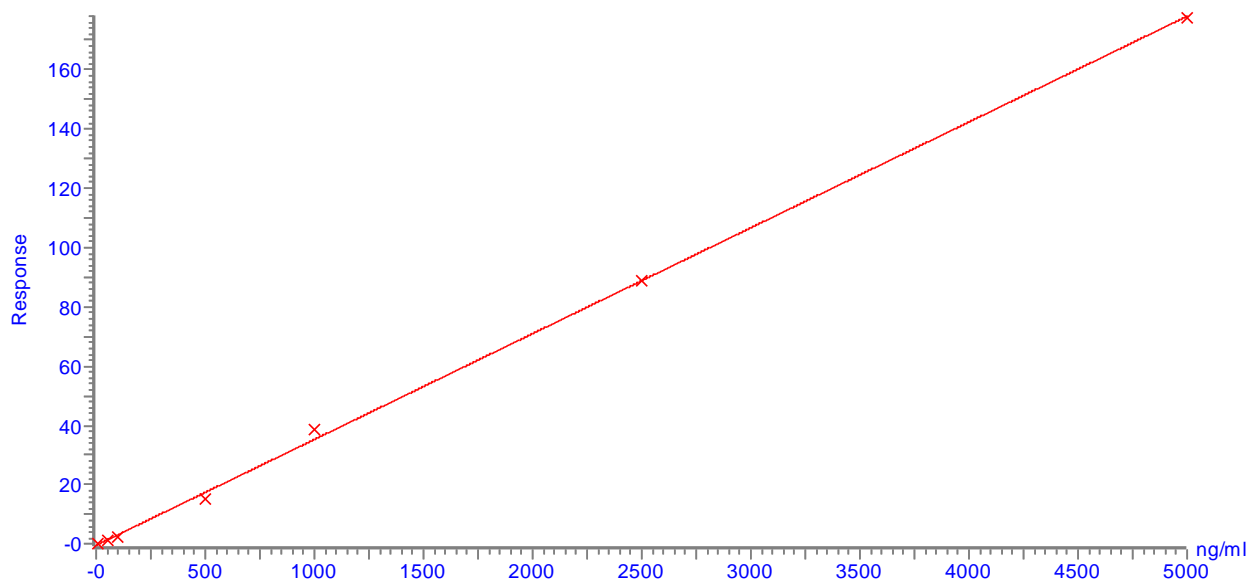

| 2,2-dimethyl glutaric acid |                  |            |         |       |         |
|----------------------------|------------------|------------|---------|-------|---------|
|                            | Std Conc (ng/mL) | Response   | Conc.   | %Dev  | S/N     |
| 1                          | 10               | 0.117666   | 14.12   | 41.2  | 91.188  |
| 2                          | 50               | 1.056333   | 40.42   | -19.2 | 153.423 |
| 3                          | 100              | 2.476715   | 80.23   | -19.8 | 213.698 |
| 4                          | 500              | 15.489613  | 444.92  | -11   | 298.275 |
| 5                          | 1000             | 38.418582  | 1087.50 | 8.7   | 177.175 |
| 6                          | 2500             | 89.099081  | 2507.81 | 0.3   | 184.401 |
| 7                          | 5000             | 177.491396 | 4985.00 | -0.3  | 382.643 |

Compound name: 2-Hydroxyoctanoic acid  
 Correlation coefficient:  $r = 0.996977$ ,  $r^2 = 0.993962$   
 Calibration curve:  $0.111386 * x + 0.106068$   
 Response type: Internal Std ( Ref 4 ), Area \* ( IS Conc. / IS Area )  
 Curve type: Linear, Origin: Exclude, Weighting: 1/x, Axis trans: None

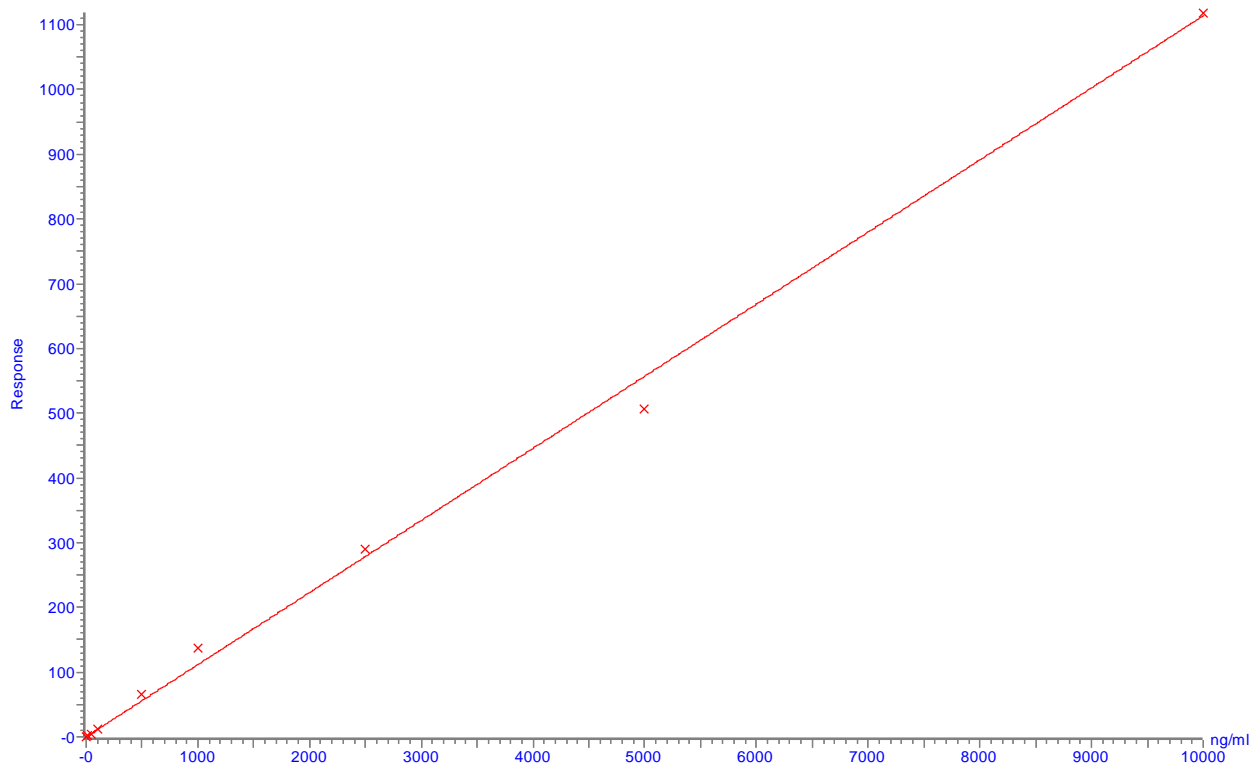

| 2-Hydroxy octanoic acid |                  |          |        |       |         |
|-------------------------|------------------|----------|--------|-------|---------|
|                         | Std Conc (ng/mL) | Response | Conc.  | %Dev  | S/N     |
| 1                       | 1                | 0.106    | 0.5    | -52.6 | 394.858 |
| 2                       | 5                | 0.769    | 6.2    | 24.5  | 461.058 |
| 3                       | 10               | 1.412    | 11.8   | 18    | 578.191 |
| 4                       | 50               | 5.085    | 43.7   | -12.7 | 401.847 |
| 5                       | 100              | 12.2     | 105.4  | 5.4   | 740.947 |
| 6                       | 500              | 66.702   | 578.2  | 15.6  | 351.503 |
| 7                       | 1000             | 114.295  | 991.1  | -0.9  | 369.303 |
| 8                       | 2500             | 293.928  | 2549.5 | 2     | 193.089 |
| 9                       | 5000             | 597.148  | 5180.1 | 3.6   | 269.731 |
| 10                      | 10000            | 1118.094 | 9699.5 | -3    | 463.901 |

Compound name: 3-Hydroxy octanoic acid  
 Correlation coefficient:  $r = 0.996814$ ,  $r^2 = 0.993637$   
 Calibration curve:  $0.0257817 \cdot x + -0.0668806$   
 Response type: Internal Std ( Ref 4 ), Area \* ( IS Conc. / IS Area )  
 Curve type: Linear, Origin: Exclude, Weighting: 1/x, Axis trans: None

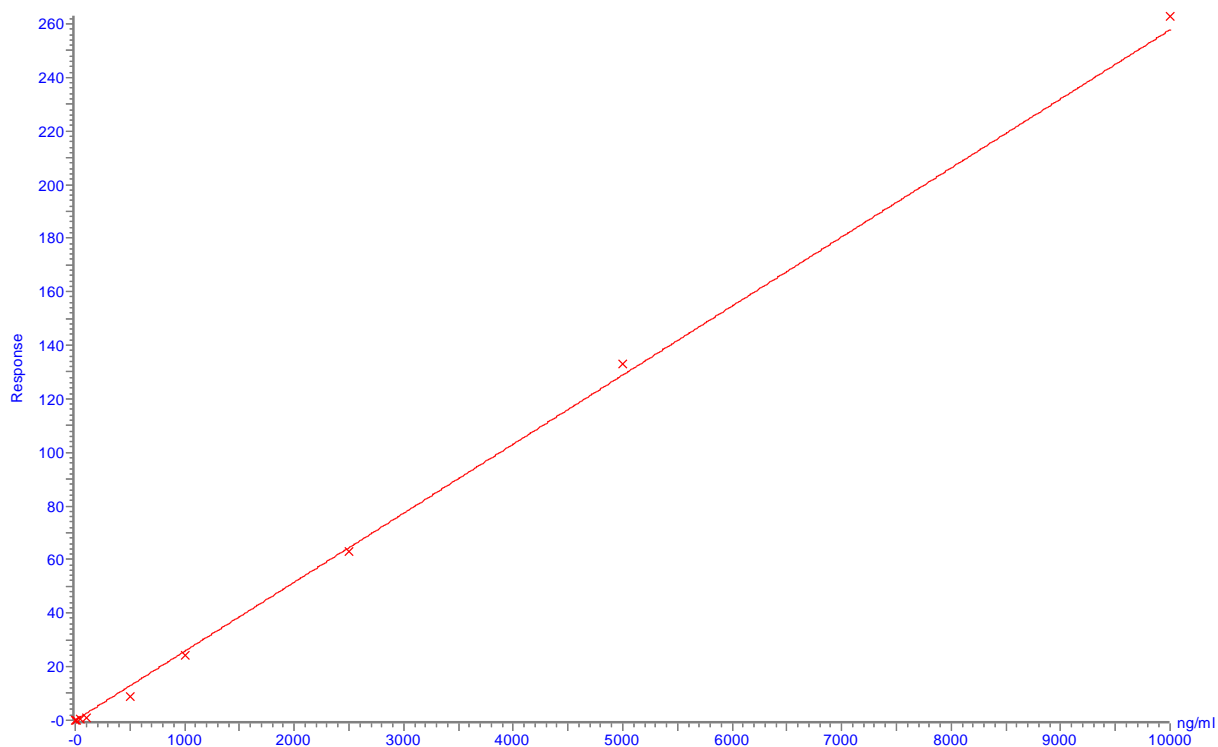

| 3-Hydroxy octanoic acid |                  |          |         |       |         |
|-------------------------|------------------|----------|---------|-------|---------|
|                         | Std Conc (ng/mL) | Response | Conc.   | %Dev  | S/N     |
| 1                       | 5                | 0.044    | 4.3     | -14.6 | 144.845 |
| 2                       | 10               | 0.09     | 6.1     | -38.7 | 342.514 |
| 3                       | 50               | 0.604    | 26.8    | -46.4 | 340.841 |
| 4                       | 100              | 0.858    | 37      | -63   | 185.768 |
| 5                       | 500              | 8.712    | 352.7   | -29.5 | 393.728 |
| 6                       | 1000             | 24.354   | 981.6   | -1.8  | 447.17  |
| 7                       | 2500             | 62.968   | 2533.9  | 1.4   | 144.924 |
| 8                       | 5000             | 115.681  | 4653.1  | -6.9  | 753.258 |
| 9                       | 10000            | 262.8    | 10567.5 | 5.7   | 859.763 |

Compound name: Hippuric acid

Correlation coefficient:  $r = 0.997902$ ,  $r^2 = 0.995808$

Calibration curve:  $0.000401555 * x + 0.01879$

Response type: Internal Std ( Ref 2 ), Area \* ( IS Conc. / IS Area )

Curve type: Linear, Origin: Exclude, Weighting: 1/x, Axis trans: None

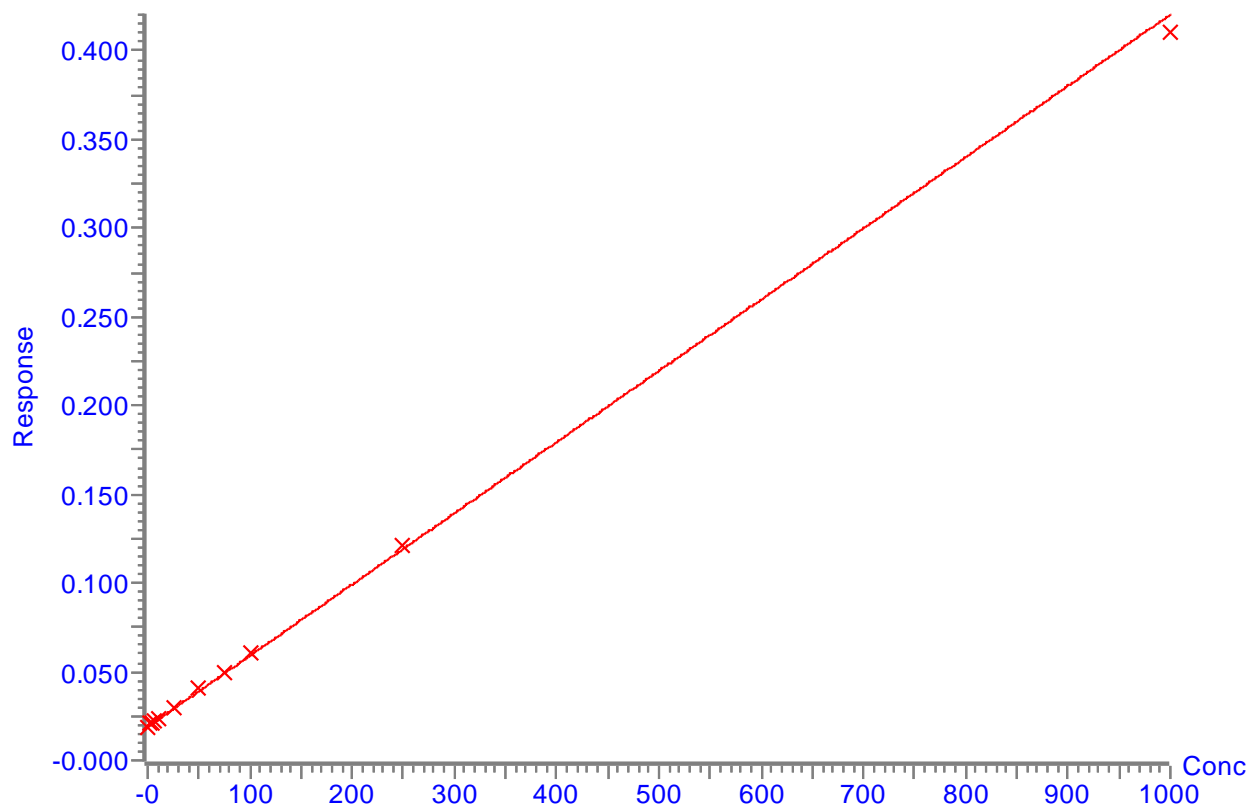

| Hippuric acid |                  |          |       |      |         |
|---------------|------------------|----------|-------|------|---------|
|               | Std Conc (ng/mL) | Response | Conc. | %Dev | S/N     |
| 1             | 5                | 0.021    | 5.8   | 16.5 | 47.737  |
| 2             | 7.5              | 0.022    | 7.7   | 2.4  | 64.29   |
| 3             | 10               | 0.024    | 12.6  | 26.2 | 28.452  |
| 4             | 25               | 0.03     | 28.3  | 13.1 | 47      |
| 5             | 50               | 0.04     | 53.5  | 7    | 134.372 |
| 6             | 75               | 0.05     | 77.9  | 3.8  | 119.733 |
| 7             | 100              | 0.061    | 105.1 | 5.1  | 103.963 |
| 8             | 250              | 0.121    | 255.5 | 2.2  | 108.609 |
| 9             | 1000             | 0.411    | 975.7 | -2.4 | 343.67  |

Compound name: Arginine

Correlation coefficient:  $r = 0.998952$ ,  $r^2 = 0.997906$

Calibration curve:  $1.95965 * x + -14.6425$

Response type: Internal Std ( Ref 9 ), Area \* ( IS Conc. / IS Area )

Curve type: Linear, Origin: Exclude, Weighting: 1/x, Axis trans: None

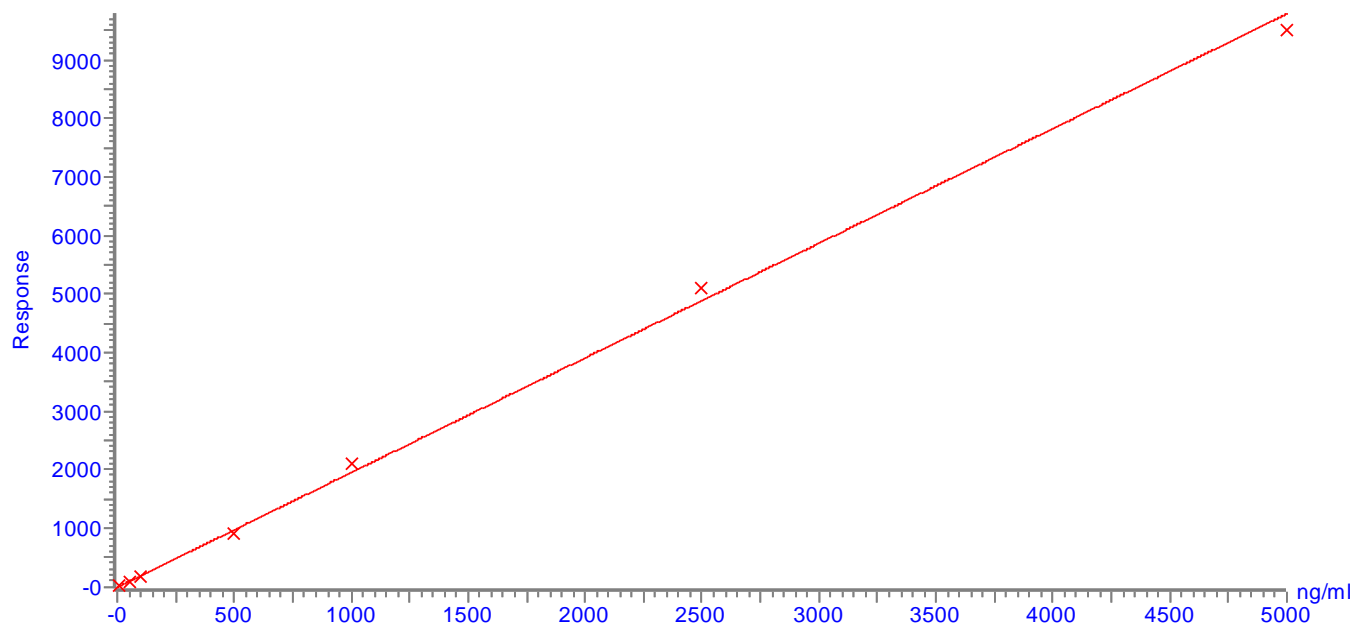

| Arginine |                  |          |       |      |          |
|----------|------------------|----------|-------|------|----------|
|          | Std Conc (ng/mL) | Response | Conc. | %Dev | S/N      |
| 1        | 5                | 0.422    | 4.5   | -9.1 | 344.129  |
| 2        | 7.5              | 0.679    | 7.7   | 2.7  | 333.202  |
| 3        | 10               | 0.856    | 9.9   | -1.2 | 470.464  |
| 4        | 25               | 2.124    | 25.5  | 1.9  | 568.347  |
| 5        | 50               | 4.312    | 52.4  | 4.8  | 1465.04  |
| 6        | 75               | 6.281    | 76.6  | 2.2  | 1766.518 |
| 7        | 100              | 8.201    | 100.3 | 0.3  | 5199.527 |
| 8        | 250              | 20.002   | 245.5 | -1.8 | 5029.683 |

Compound name: 10-Undecenoic acid

Correlation coefficient:  $r = 0.998897$ ,  $r^2 = 0.997795$

Calibration curve:  $0.00658025 * x + 0.0014644$

Response type: Internal Std ( Ref 2 ), Area \* ( IS Conc. / IS Area )

Curve type: Linear, Origin: Exclude, Weighting: 1/x, Axis trans: None

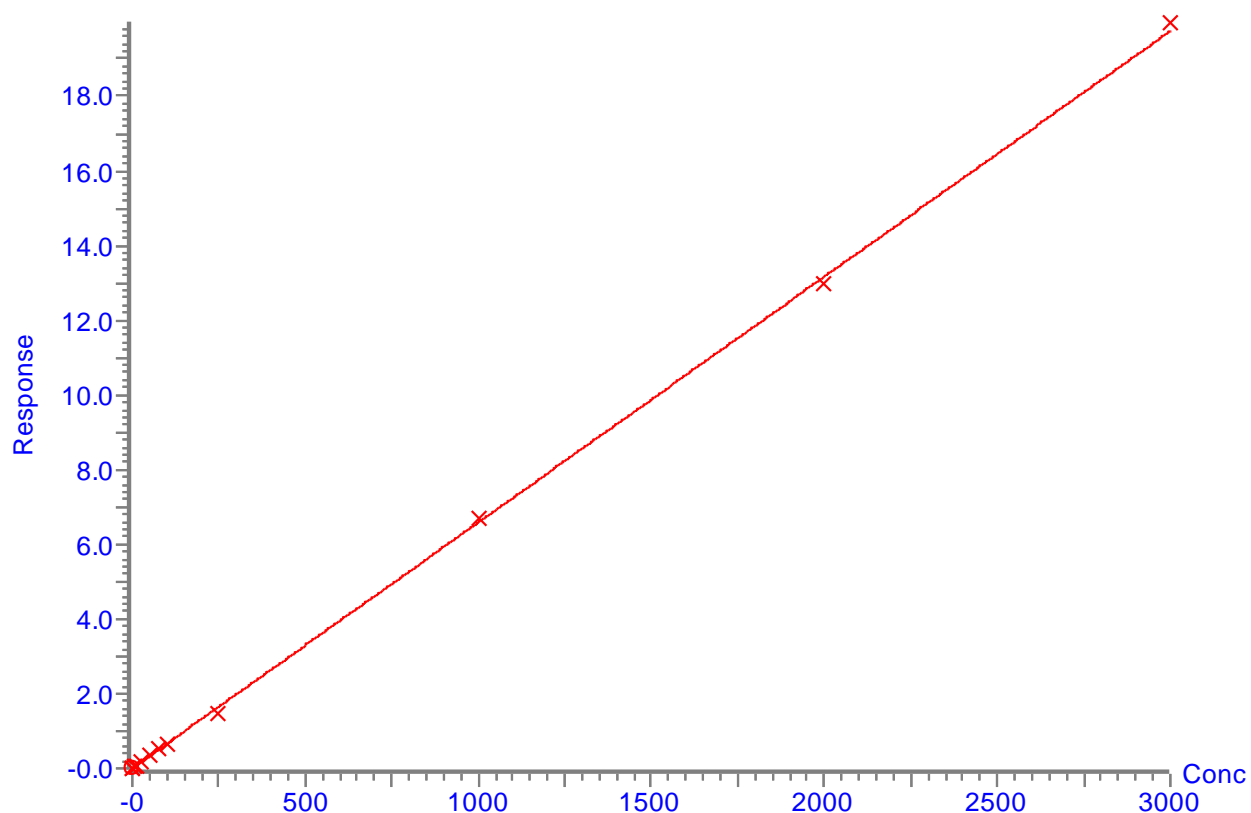

| 10-undecenoic acid |                  |          |        |       |          |
|--------------------|------------------|----------|--------|-------|----------|
|                    | Std Conc (ng/mL) | Response | Conc.  | %Dev  | S/N      |
| 1                  | 5                | 0.035    | 5.1    | 1.1   | 81.014   |
| 2                  | 7.5              | 0.055    | 8.2    | 9.2   | 152.38   |
| 3                  | 10               | 0.071    | 10.6   | 6     | 166.352  |
| 4                  | 25               | 0.185    | 27.9   | 11.5  | 290.09   |
| 5                  | 50               | 0.364    | 55.2   | 10.3  | 425.348  |
| 6                  | 75               | 0.515    | 78     | 4     | 689.435  |
| 7                  | 100              | 0.665    | 100.9  | 0.9   | 719.426  |
| 8                  | 250              | 1.458    | 221.4  | -11.5 | 880.615  |
| 9                  | 1000             | 6.67     | 1013.4 | 1.3   | 3513.382 |
| 10                 | 2000             | 12.971   | 1971.1 | -1.4  | 2934.238 |
| 11                 | 3000             | 19.966   | 3034   | 1.1   | 1799.157 |

Compound name: Tridecanoic acid

Correlation coefficient:  $r = 0.999471$ ,  $r^2 = 0.998941$

Calibration curve:  $0.0161738 * x + 0.0606132$

Response type: Internal Std ( Ref 2 ), Area \* ( IS Conc. / IS Area )

Curve type: Linear, Origin: Exclude, Weighting: 1/x, Axis trans: None

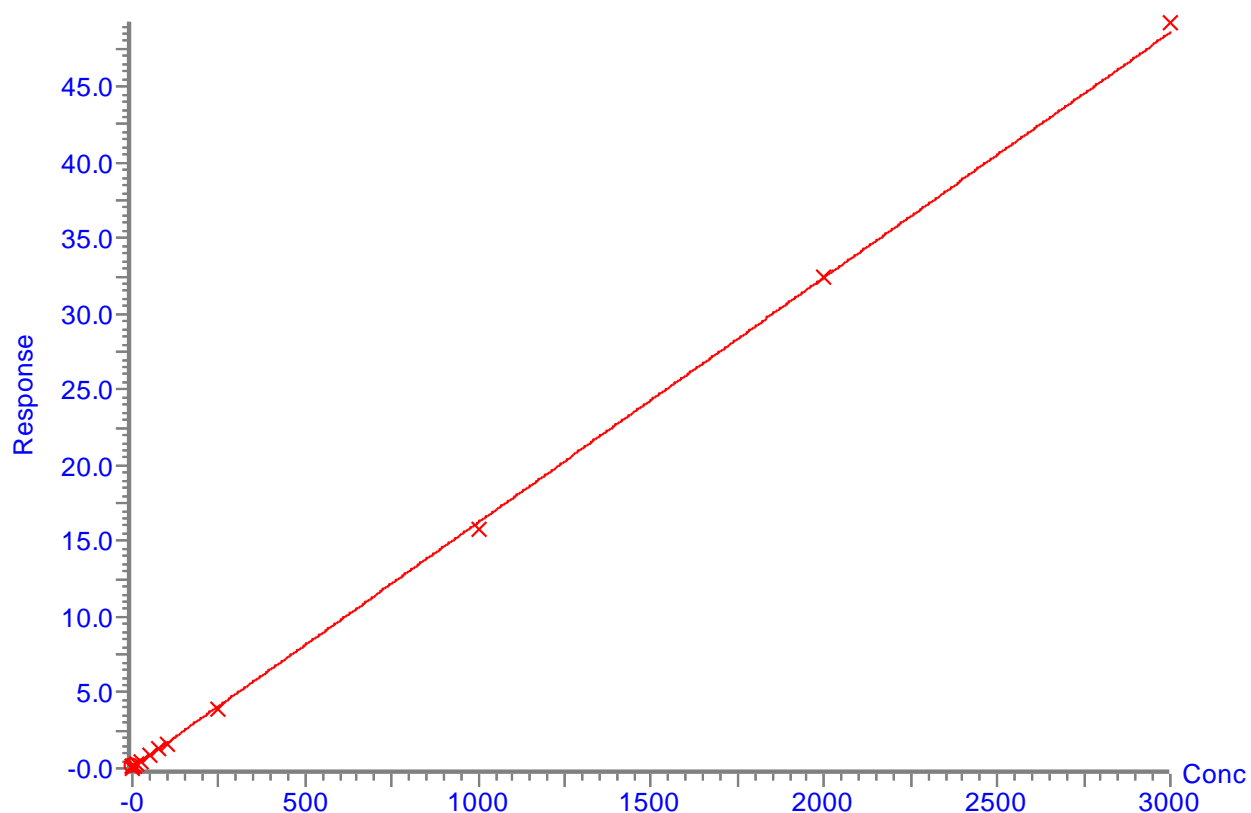

| Tridecanoic acid |                  |          |        |      |      |
|------------------|------------------|----------|--------|------|------|
|                  | Std Conc (ng/mL) | Response | Conc.  | %Dev | S/N  |
| 1                | 0.5              | 0.069    | 0.5    | 6.3  | 0.5  |
| 2                | 1                | 0.078    | 1.1    | 5.9  | 1    |
| 3                | 2.5              | 0.101    | 2.5    | 0.2  | 2.5  |
| 4                | 7.5              | 0.173    | 6.9    | -7.7 | 7.5  |
| 5                | 10               | 0.224    | 10.1   | 0.9  | 10   |
| 6                | 50               | 0.85     | 48.8   | -2.4 | 50   |
| 7                | 100              | 1.654    | 98.5   | -1.5 | 100  |
| 8                | 250              | 3.909    | 237.9  | -4.8 | 250  |
| 9                | 1000             | 15.831   | 975    | -2.5 | 1000 |
| 10               | 2000             | 32.369   | 1997.6 | -0.1 | 2000 |
| 11               | 3000             | 49.23    | 3040   | 1.3  | 3000 |



Compound name: 2/3-Hydroxy Dodecanoic acid  
 Correlation coefficient:  $r = 0.999673$ ,  $r^2 = 0.999346$   
 Calibration curve:  $0.00594629 * x + 0.000476821$   
 Response type: Internal Std ( Ref 2 ), Area \* ( IS Conc. / IS Area )  
 Curve type: Linear, Origin: Exclude, Weighting: 1/x, Axis trans: None

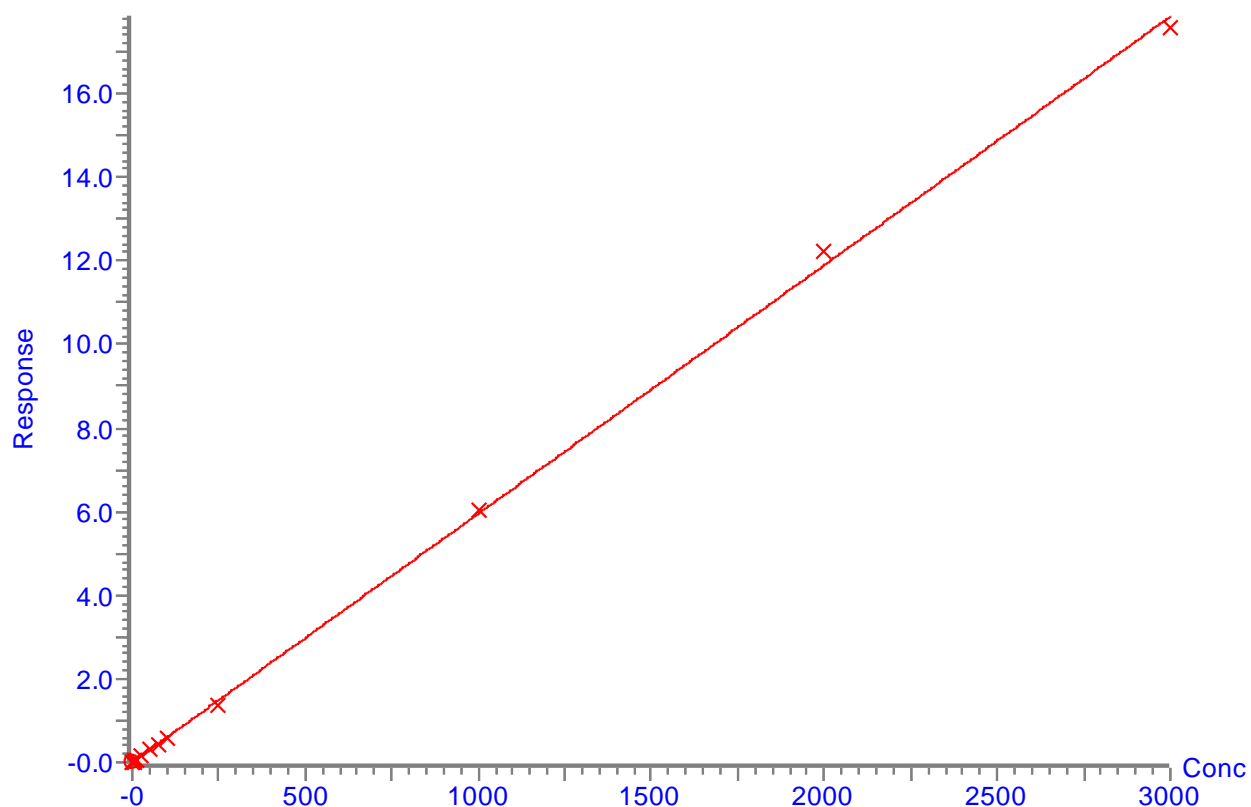

| 2/3-Hydroxy Dodecanoic acid |                  |          |        |       |          |
|-----------------------------|------------------|----------|--------|-------|----------|
|                             | Std Conc (ng/mL) | Response | Conc.  | %Dev  | S/N      |
| 1                           | 5                | 0.026    | 4.3    | -13.5 | 75.201   |
| 2                           | 7.5              | 0.044    | 7.3    | -2.4  | 128.067  |
| 3                           | 10               | 0.055    | 9.1    | -8.7  | 126.026  |
| 4                           | 25               | 0.137    | 23     | -8    | 327.292  |
| 5                           | 50               | 0.296    | 49.7   | -0.6  | 485.893  |
| 6                           | 75               | 0.422    | 70.9   | -5.4  | 404.852  |
| 7                           | 100              | 0.57     | 95.8   | -4.2  | 549.867  |
| 8                           | 250              | 1.381    | 232.2  | -7.1  | 723.783  |
| 9                           | 1000             | 6.042    | 1016   | 1.6   | 2228.381 |
| 10                          | 2000             | 12.216   | 2054.2 | 2.7   | 2423.403 |
| 11                          | 3000             | 17.601   | 2959.9 | -1.3  | 1049.675 |

Compound name: Myristic acid

Correlation coefficient:  $r = 0.997841$ ,  $r^2 = 0.995686$

Calibration curve:  $0.0156622 * x + 0.0735729$

Response type: Internal Std ( Ref 2 ), Area \* ( IS Conc. / IS Area )

Curve type: Linear, Origin: Exclude, Weighting:  $1/x$ , Axis trans: None

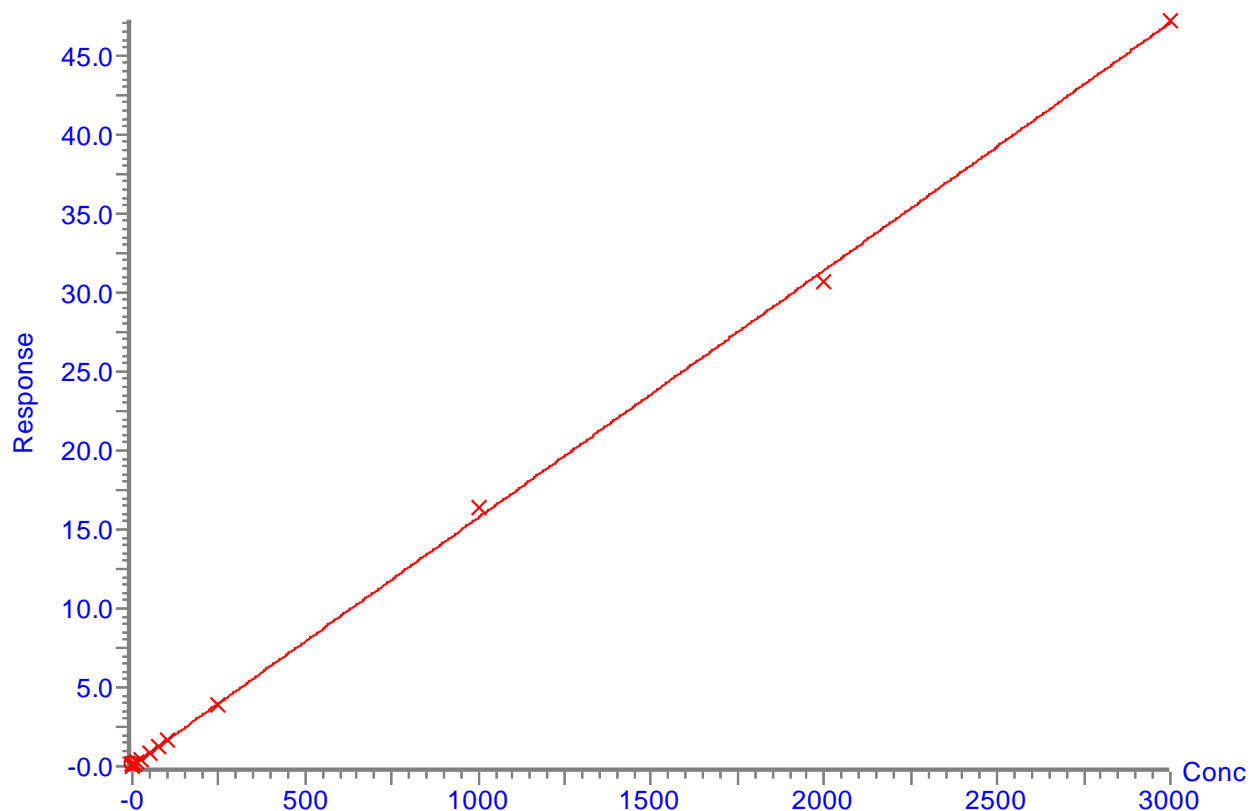

| Myristic acid |                  |          |        |      |          |
|---------------|------------------|----------|--------|------|----------|
|               | Std Conc (ng/mL) | Response | Conc.  | %Dev | S/N      |
| 1             | 1                | 0.09     | 1.1    | 5    | 209.817  |
| 2             | 5                | 0.154    | 5.1    | 2.8  | 310.251  |
| 3             | 10               | 0.238    | 10.5   | 4.9  | 565.674  |
| 4             | 25               | 0.466    | 25     | 0.1  | 641.044  |
| 5             | 50               | 0.879    | 51.4   | 2.8  | 1210.16  |
| 6             | 75               | 1.24     | 74.5   | -0.7 | 1756.053 |
| 7             | 100              | 1.689    | 103.1  | 3.1  | 2051.857 |
| 8             | 250              | 3.902    | 244.5  | -2.2 | 2207.526 |
| 9             | 1000             | 16.332   | 1038.1 | 3.8  | 4383.967 |
| 10            | 2000             | 30.673   | 1953.7 | -2.3 | 4971.424 |
| 11            | 3000             | 47.194   | 3008.5 | 0.3  | 4167.69  |

Compound name: Dodecanedioic acid

Correlation coefficient:  $r = 0.999513$ ,  $r^2 = 0.999026$

Calibration curve:  $0.00201398 * x + 0.0047634$

Response type: Internal Std ( Ref 2 ), Area \* ( IS Conc. / IS Area )

Curve type: Linear, Origin: Exclude, Weighting: 1/x, Axis trans: None

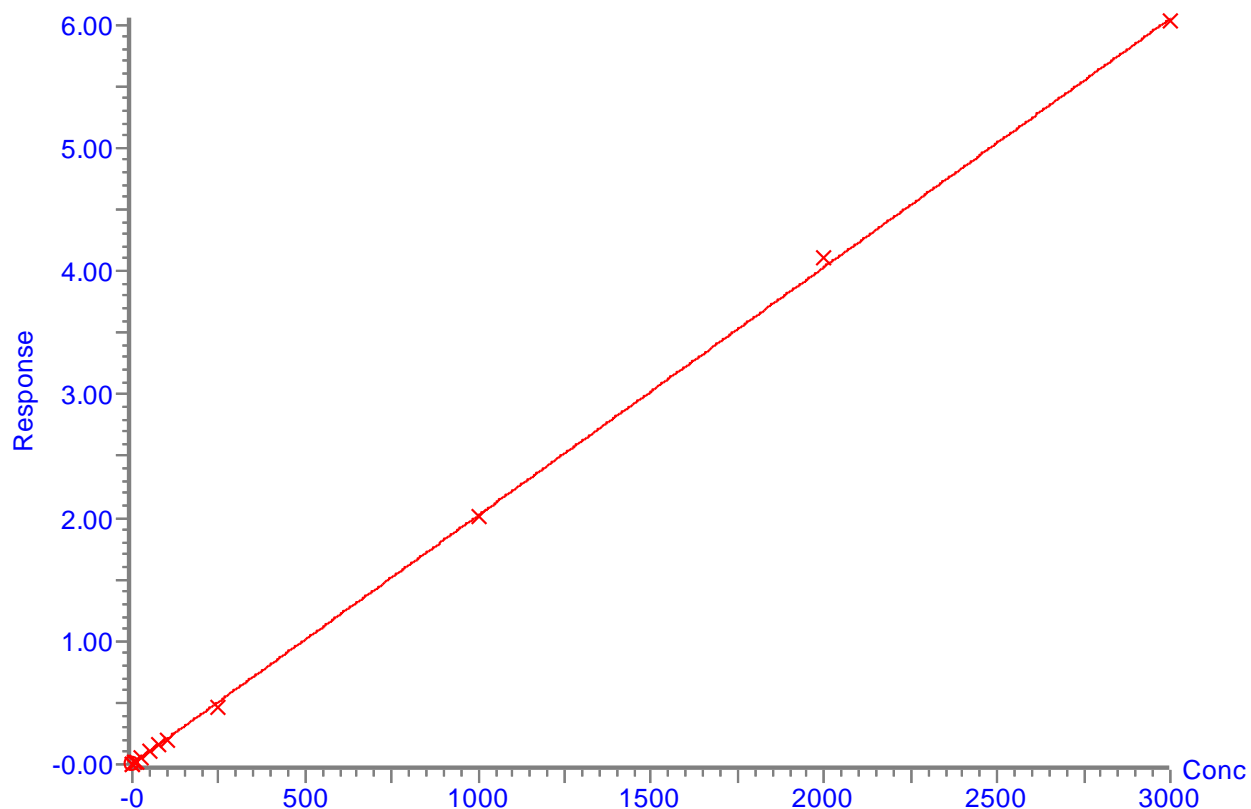

| Dodecanedioic acid |                  |          |        |      |         |
|--------------------|------------------|----------|--------|------|---------|
|                    | Std Conc (ng/mL) | Response | Conc.  | %Dev | S/N     |
| 1                  | 1                | 0.007    | 1      | 1.6  | 8.145   |
| 2                  | 5                | 0.015    | 5.1    | 1.7  | 16.362  |
| 3                  | 7.5              | 0.02     | 7.5    | -0.5 | 13.32   |
| 4                  | 10               | 0.025    | 10.2   | 2.2  | 34.392  |
| 5                  | 50               | 0.105    | 49.6   | -0.7 | 84.76   |
| 6                  | 100              | 0.194    | 94     | -6   | 124.554 |
| 7                  | 250              | 0.469    | 230.6  | -7.8 | 119.77  |
| 8                  | 1000             | 2.012    | 996.4  | -0.4 | 772.149 |
| 9                  | 2000             | 4.117    | 2041.7 | 2.1  | 693.657 |
| 10                 | 3000             | 6.026    | 2989.6 | -0.3 | 342.897 |

Compound name: Hydroxy Myristic acid

Correlation coefficient:  $r = 0.995931$ ,  $r^2 = 0.991878$

Calibration curve:  $0.0183036 * x + 0.0072617$

Response type: Internal Std ( Ref 2 ), Area \* ( IS Conc. / IS Area )

Curve type: Linear, Origin: Exclude, Weighting:  $1/x$ , Axis trans: None

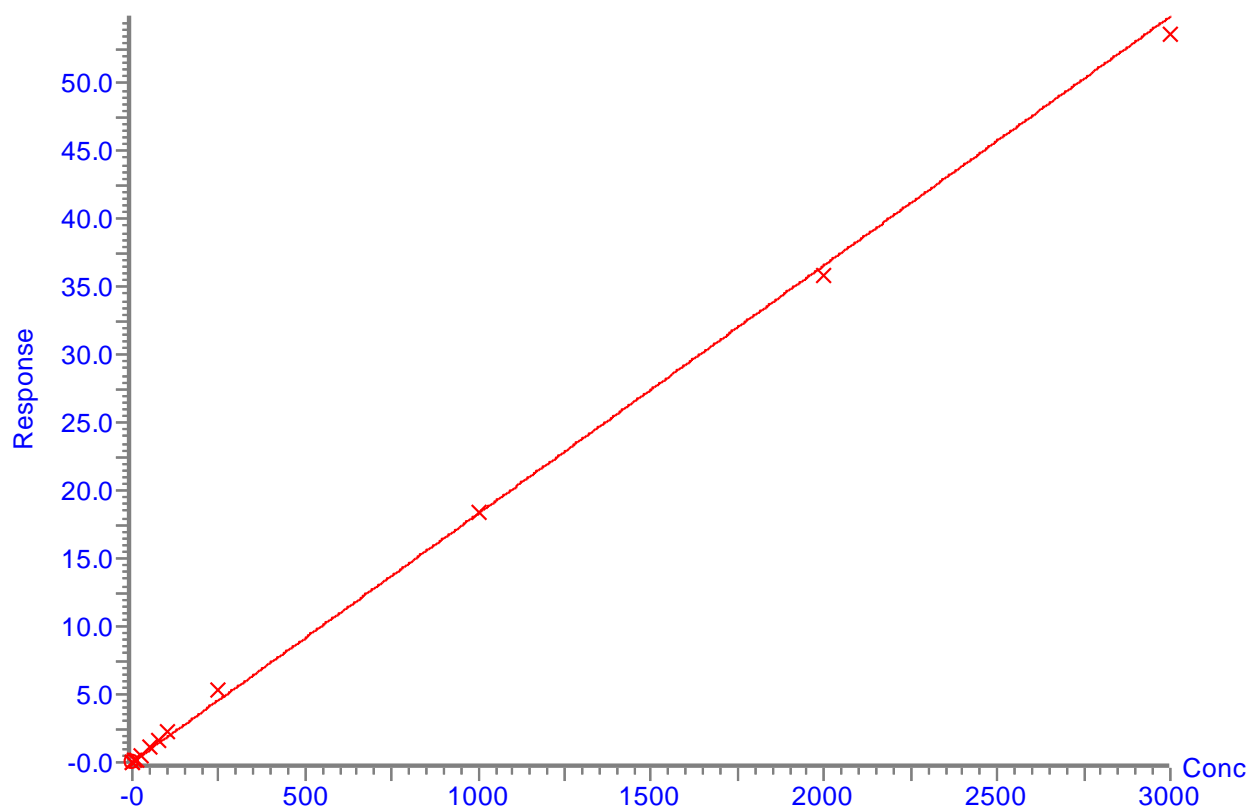

| Hydroxy Myristic acid |                  |          |        |      |          |
|-----------------------|------------------|----------|--------|------|----------|
|                       | Std Conc (ng/mL) | Response | Conc.  | %Dev | S/N      |
| 1                     | 5                | 0.115    | 5.9    | 18.2 | 187.74   |
| 2                     | 7.5              | 0.168    | 8.8    | 17.4 | 270.668  |
| 3                     | 10               | 0.238    | 12.6   | 26.1 | 623.022  |
| 4                     | 25               | 0.553    | 29.8   | 19.3 | 1124.301 |
| 5                     | 50               | 1.103    | 59.9   | 19.7 | 957.243  |
| 6                     | 75               | 1.677    | 91.2   | 21.6 | 1710.829 |
| 7                     | 100              | 2.255    | 122.8  | 22.8 | 2215.766 |
| 8                     | 250              | 5.388    | 294    | 17.6 | 3260.147 |
| 9                     | 1000             | 18.475   | 1008.9 | 0.9  | 1589.311 |
| 10                    | 2000             | 35.864   | 1959   | -2.1 | 4322.782 |
| 11                    | 3000             | 53.666   | 2931.6 | -2.3 | 2639.124 |

Compound name: Pentadecanoic acid

Correlation coefficient:  $r = 0.998564$ ,  $r^2 = 0.997131$

Calibration curve:  $0.0134157 \cdot x + 0.091921$

Response type: Internal Std ( Ref 2 ), Area \* ( IS Conc. / IS Area )

Curve type: Linear, Origin: Exclude, Weighting:  $1/x$ , Axis trans: None

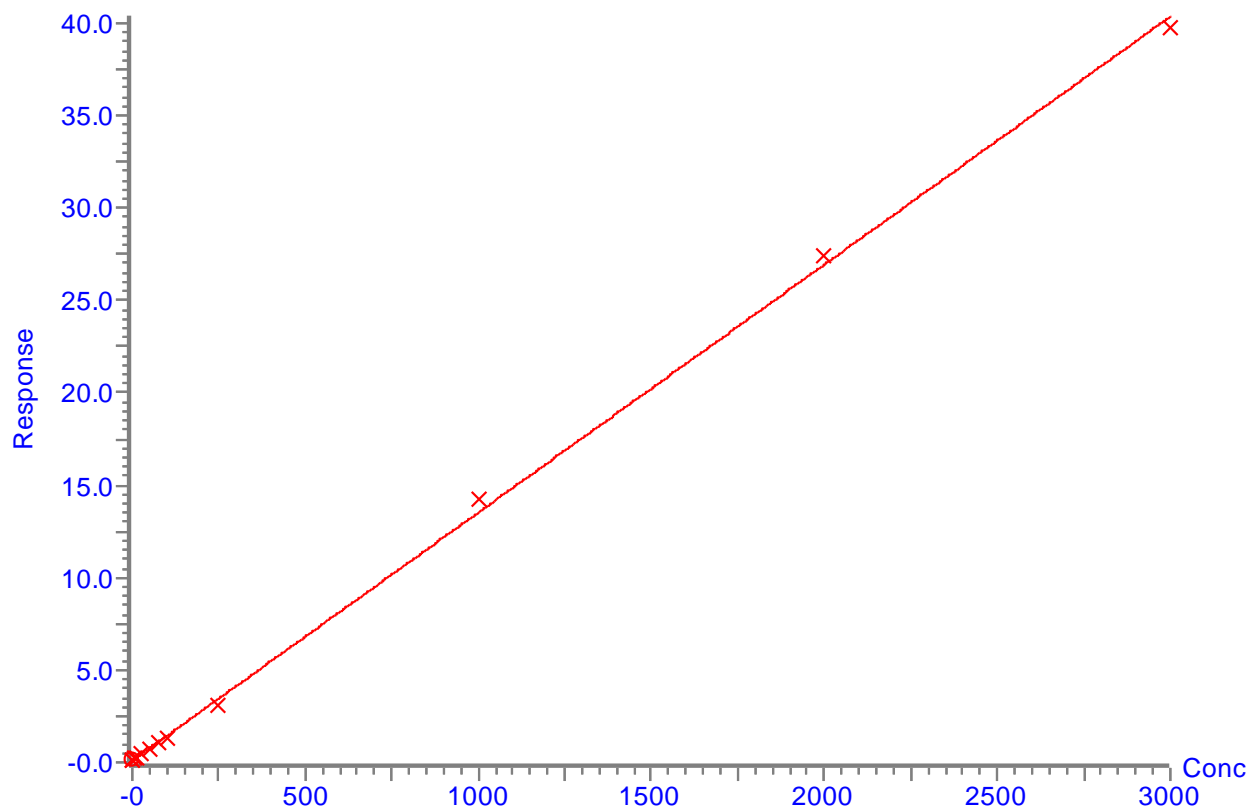

| Pentadecanoic acid |                  |          |        |       |           |
|--------------------|------------------|----------|--------|-------|-----------|
|                    | Std Conc (ng/mL) | Response | Conc.  | %Dev  | S/N       |
| 1                  | 0.5              | 0.099    | 0.5    | 5.4   | 363.658   |
| 2                  | 1                | 0.104    | 0.9    | -6.5  | 358.519   |
| 3                  | 2.5              | 0.15     | 4.4    | 74.5  | 218.5     |
| 4                  | 10               | 0.209    | 8.7    | -12.9 | 706.547   |
| 5                  | 25               | 0.42     | 24.5   | -2.2  | 1084.423  |
| 6                  | 50               | 0.733    | 47.8   | -4.4  | 1728.278  |
| 7                  | 75               | 1.047    | 71.2   | -5.1  | 2058.311  |
| 8                  | 100              | 1.341    | 93.1   | -6.9  | 2012.386  |
| 9                  | 250              | 3.076    | 222.4  | -11   | 2535.801  |
| 10                 | 1000             | 14.194   | 1051.1 | 5.1   | 8344.425  |
| 11                 | 2000             | 27.41    | 2036.3 | 1.8   | 10764.43  |
| 12                 | 3000             | 39.693   | 2951.9 | -1.6  | 13692.682 |

Compound name: Palmitoleic acid

Correlation coefficient:  $r = 0.998733$ ,  $r^2 = 0.997467$

Calibration curve:  $0.00426706 * x + 0.00263467$

Response type: Internal Std ( Ref 2 ), Area \* ( IS Conc. / IS Area )

Curve type: Linear, Origin: Exclude, Weighting: 1/x, Axis trans: None

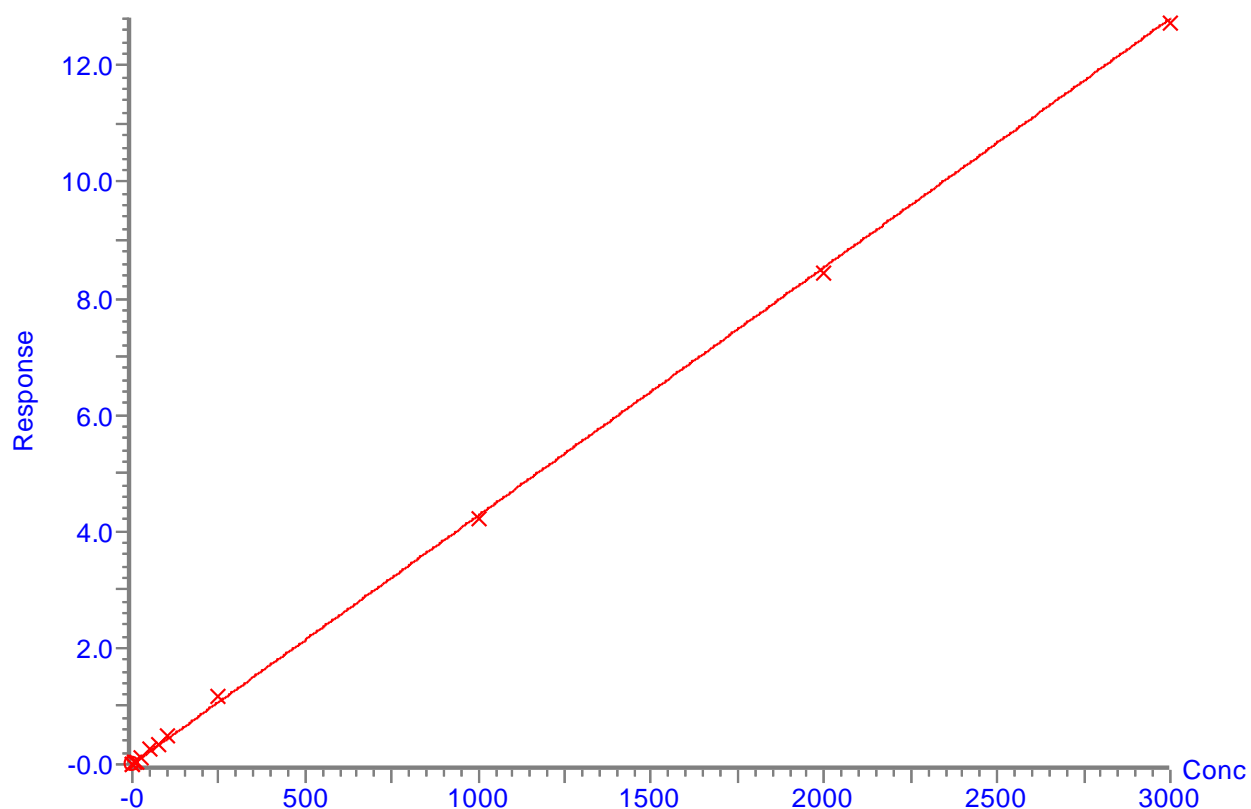

| Palmitoleic acid |                  |          |        |       |          |
|------------------|------------------|----------|--------|-------|----------|
|                  | Std Conc (ng/mL) | Response | Conc.  | %Dev  | S/N      |
| 1                | 1                | 0.007    | 1      | -1.1  | 11.876   |
| 2                | 5                | 0.024    | 5.1    | 1     | 88.446   |
| 3                | 7.5              | 0.035    | 7.7    | 2.5   | 106.638  |
| 4                | 10               | 0.041    | 9      | -10.5 | 148.634  |
| 5                | 25               | 0.113    | 25.9   | 3.7   | 231.977  |
| 6                | 50               | 0.259    | 60     | 20    | 707.551  |
| 7                | 75               | 0.353    | 82.1   | 9.4   | 671.369  |
| 8                | 100              | 0.474    | 110.4  | 10.4  | 795.536  |
| 9                | 250              | 1.182    | 276.4  | 10.6  | 1471.554 |
| 10               | 1000             | 4.205    | 984.9  | -1.5  | 3420.18  |
| 11               | 2000             | 8.452    | 1980.1 | -1    | 2702.507 |
| 12               | 3000             | 12.728   | 2982.3 | -0.6  | 2775.838 |

Compound name: Heptadecenoic acid

Correlation coefficient:  $r = 0.998315$ ,  $r^2 = 0.996633$

Calibration curve:  $0.0137598 * x + 0.0026414$

Response type: Internal Std ( Ref 2 ), Area \* ( IS Conc. / IS Area )

Curve type: Linear, Origin: Exclude, Weighting: 1/x, Axis trans: None

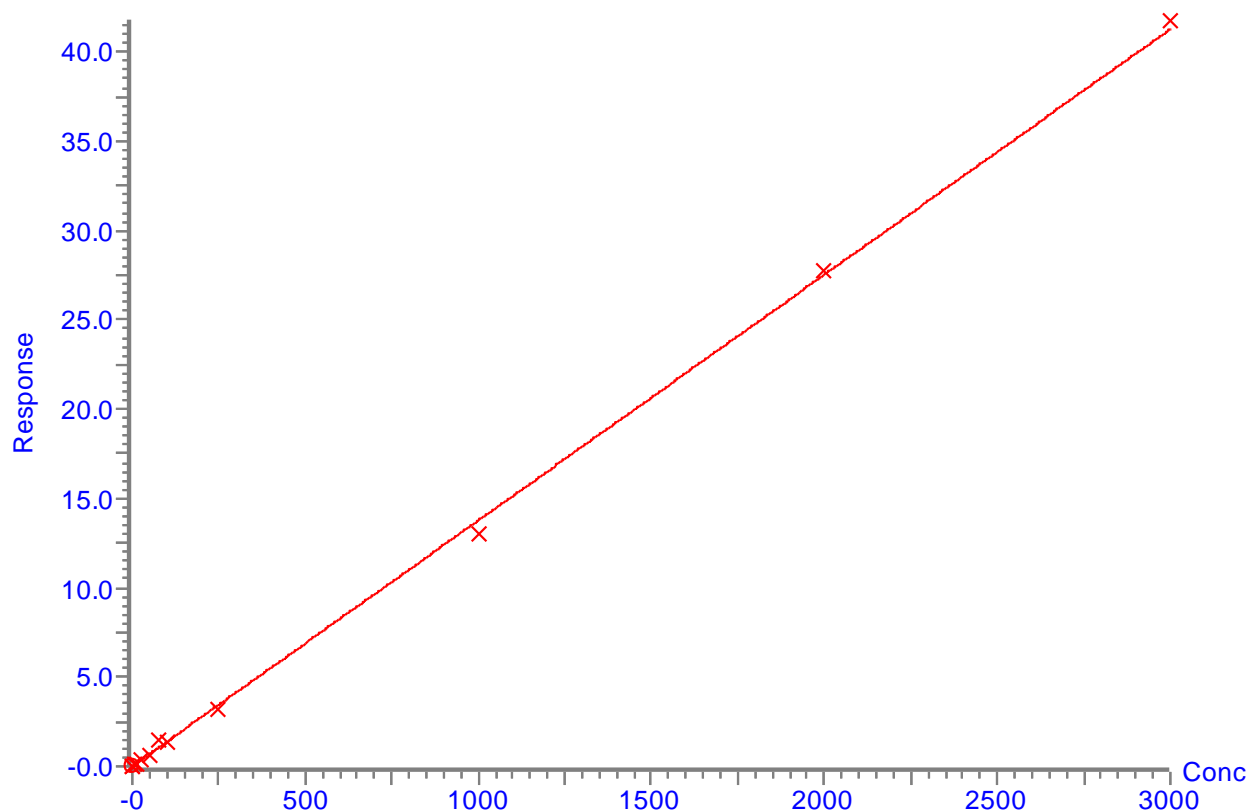

| Heptadecenoic acid |                  |          |        |       |          |
|--------------------|------------------|----------|--------|-------|----------|
|                    | Std Conc (ng/mL) | Response | Conc.  | %Dev  | S/N      |
| 1                  | 5                | 0.075    | 5.3    | 5.1   | 102.27   |
| 2                  | 7.5              | 0.102    | 7.2    | -3.4  | 98.516   |
| 3                  | 10               | 0.132    | 9.4    | -6    | 229.273  |
| 4                  | 25               | 0.341    | 24.6   | -1.6  | 295.633  |
| 5                  | 50               | 0.583    | 42.2   | -15.7 | 450.271  |
| 6                  | 75               | 1.472    | 106.8  | 42.4  | 1026.598 |
| 7                  | 100              | 1.333    | 96.7   | -3.3  | 923.408  |
| 8                  | 250              | 3.166    | 229.9  | -8    | 1321.608 |
| 9                  | 1000             | 13.014   | 945.6  | -5.4  | 3961.499 |
| 10                 | 2000             | 27.813   | 2021.1 | 1.1   | 3366.878 |
| 11                 | 3000             | 41.752   | 3034.2 | 1.1   | 3187.396 |

Compound name: Heptadecanoic acid

Correlation coefficient:  $r = 0.998497$ ,  $r^2 = 0.996997$

Calibration curve:  $0.0140287 * x + 0.0761505$

Response type: Internal Std ( Ref 2 ), Area \* ( IS Conc. / IS Area )

Curve type: Linear, Origin: Exclude, Weighting: 1/x, Axis trans: None

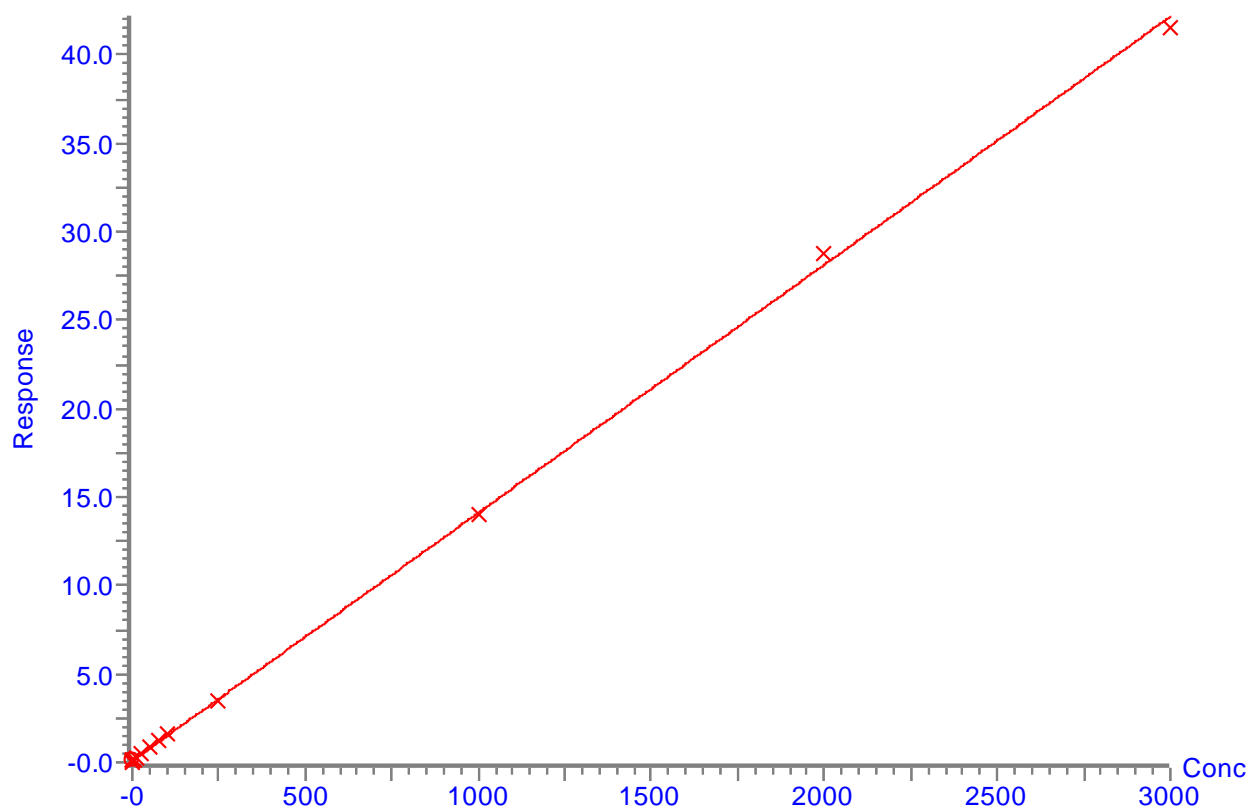

| Heptadecanoic acid |                  |          |        |      |           |
|--------------------|------------------|----------|--------|------|-----------|
|                    | Std Conc (ng/mL) | Response | Conc.  | %Dev | S/N       |
| 1                  | 1                | 0.09     | 1      | -1.2 | 276.607   |
| 2                  | 5                | 0.152    | 5.4    | 8    | 709.384   |
| 3                  | 10               | 0.228    | 10.9   | 8.5  | 587.996   |
| 4                  | 50               | 0.816    | 52.7   | 5.5  | 2298.744  |
| 5                  | 75               | 1.178    | 78.6   | 4.8  | 2995.649  |
| 6                  | 100              | 1.565    | 106.1  | 6.1  | 2138.893  |
| 7                  | 250              | 3.507    | 244.6  | -2.2 | 3574.939  |
| 8                  | 1000             | 14.073   | 997.8  | -0.2 | 11299.334 |
| 9                  | 2000             | 28.737   | 2043.1 | 2.2  | 10419.188 |
| 10                 | 3000             | 41.511   | 2953.6 | -1.5 | 12254.106 |



Compound name: Hydroxy Palmitic acid

Correlation coefficient:  $r = 0.998731$ ,  $r^2 = 0.997463$

Calibration curve:  $0.0110666 * x + 0.00292661$

Response type: Internal Std ( Ref 2 ), Area \* ( IS Conc. / IS Area )

Curve type: Linear, Origin: Exclude, Weighting:  $1/x$ , Axis trans: None

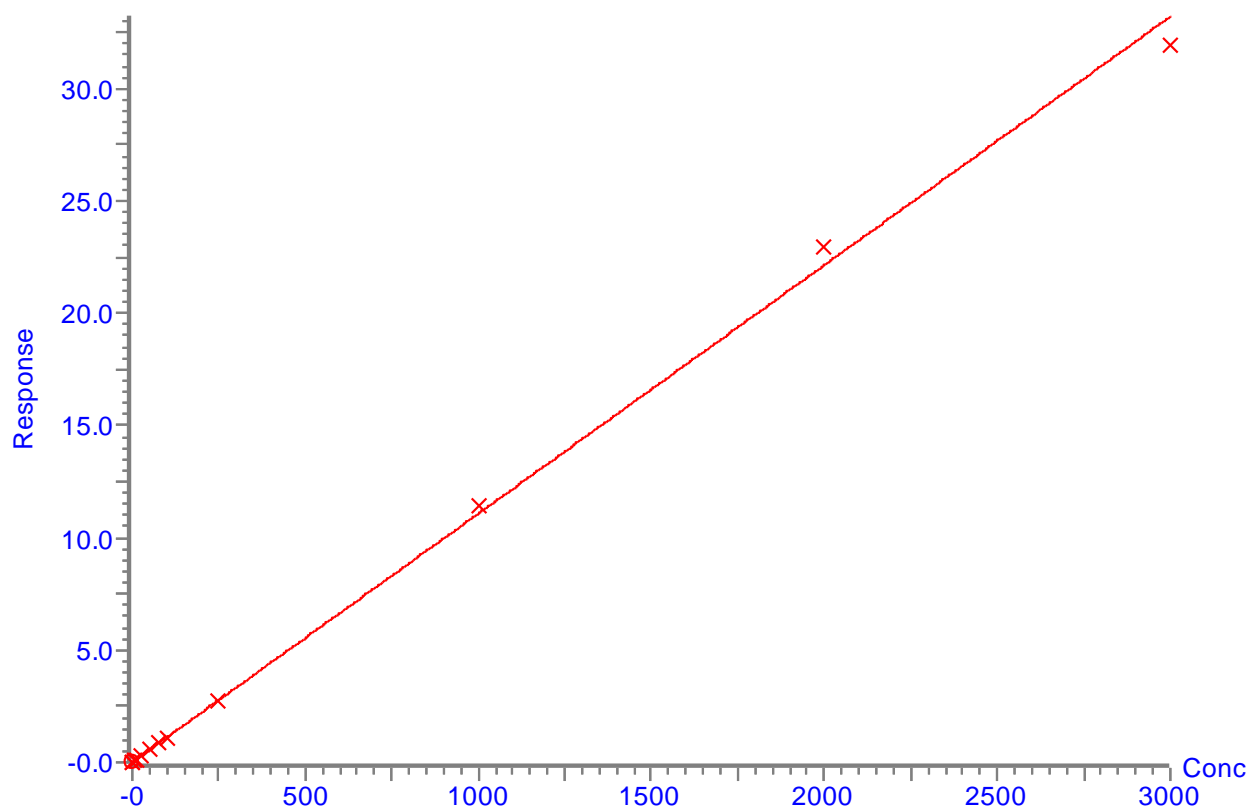

| Hydroxy palmitic acid |                  |          |        |      |          |
|-----------------------|------------------|----------|--------|------|----------|
|                       | Std Conc (ng/mL) | Response | Conc.  | %Dev | S/N      |
| 1                     | 5                | 0.063    | 5.4    | 8.8  | 104.988  |
| 2                     | 7.5              | 0.09     | 7.9    | 5    | 215.196  |
| 3                     | 10               | 0.116    | 10.3   | 2.5  | 300.859  |
| 4                     | 25               | 0.279    | 24.9   | -0.3 | 547.866  |
| 5                     | 50               | 0.612    | 55.1   | 10.2 | 693.024  |
| 6                     | 75               | 0.903    | 81.3   | 8.4  | 790.14   |
| 7                     | 100              | 1.078    | 97.1   | -2.9 | 989.615  |
| 8                     | 250              | 2.756    | 248.8  | -0.5 | 1798.74  |
| 9                     | 1000             | 11.432   | 1032.7 | 3.3  | 4180.396 |
| 10                    | 2000             | 22.995   | 2077.6 | 3.9  | 3293.208 |
| 11                    | 3000             | 31.927   | 2884.7 | -3.8 | 2393.853 |

Compound name: Linoelaidic acid

Correlation coefficient:  $r = 0.999447$ ,  $r^2 = 0.998895$

Calibration curve:  $0.00110851 * x + -0.000189746$

Response type: Internal Std ( Ref 2 ), Area \* ( IS Conc. / IS Area )

Curve type: Linear, Origin: Exclude, Weighting: 1/x, Axis trans: None

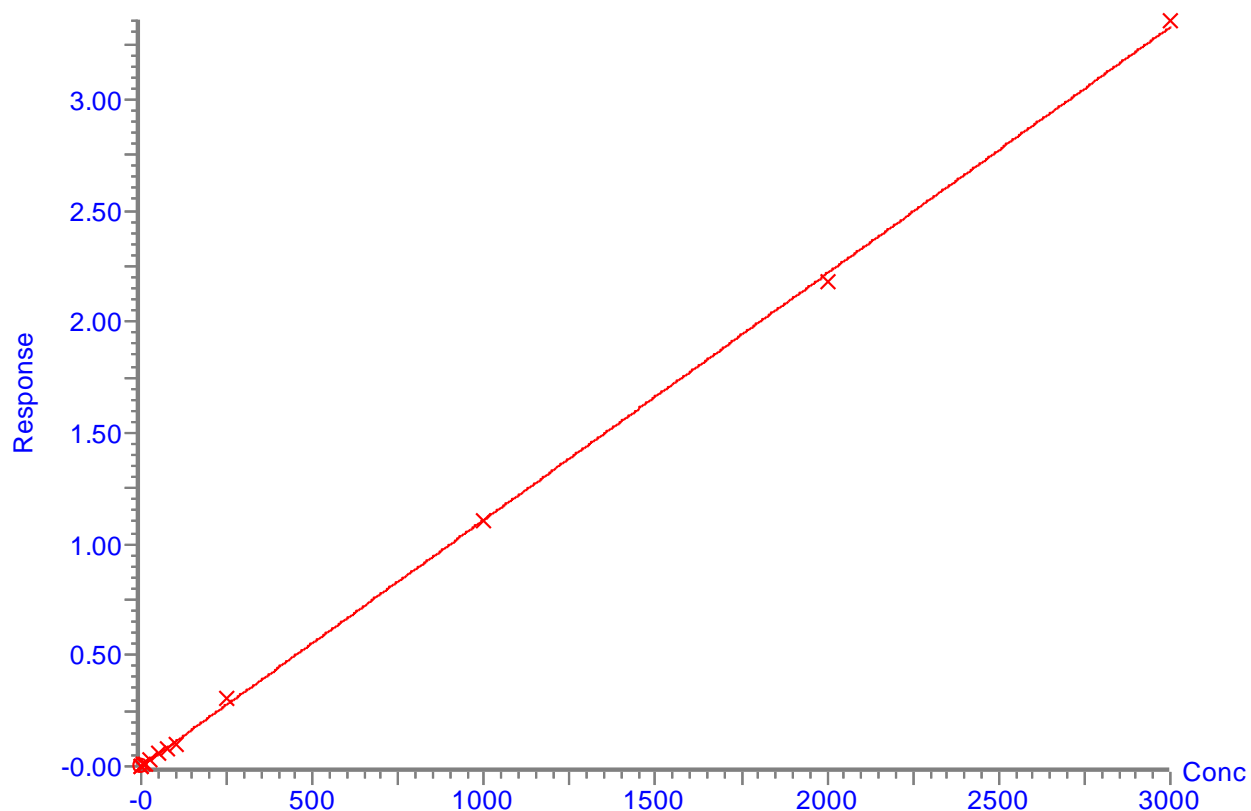

| Linoelaidic acid |                  |          |        |       |         |
|------------------|------------------|----------|--------|-------|---------|
|                  | Std Conc (ng/mL) | Response | Conc.  | %Dev  | S/N     |
| 1                | 5                | 0.005    | 5.1    | 2.6   | 7.934   |
| 2                | 7.5              | 0.008    | 7.6    | 1     | 47529   |
| 3                | 10               | 0.012    | 10.7   | 6.6   | 29.364  |
| 4                | 25               | 0.026    | 23.9   | -4.3  | 51.805  |
| 5                | 50               | 0.056    | 51     | 2     | 174.215 |
| 6                | 75               | 0.077    | 69.8   | -6.9  | 58.605  |
| 7                | 100              | 0.098    | 88.3   | -11.7 | 105.284 |
| 8                | 250              | 0.306    | 276.6  | 10.6  | 122.065 |
| 9                | 1000             | 1.107    | 998.9  | -0.1  | 343.617 |
| 10               | 2000             | 2.18     | 1966.6 | -1.7  | 316.201 |
| 11               | 3000             | 3.354    | 3025.6 | 0.9   | 196.14  |

Compound name: 12 (Z)-Conjugated Linoleic acid  
 Correlation coefficient:  $r = 0.998756$ ,  $r^2 = 0.997513$   
 Calibration curve:  $0.00102806 * x + 0.000569885$   
 Response type: Internal Std ( Ref 2 ), Area \* ( IS Conc. / IS Area )  
 Curve type: Linear, Origin: Exclude, Weighting: 1/x, Axis trans: None

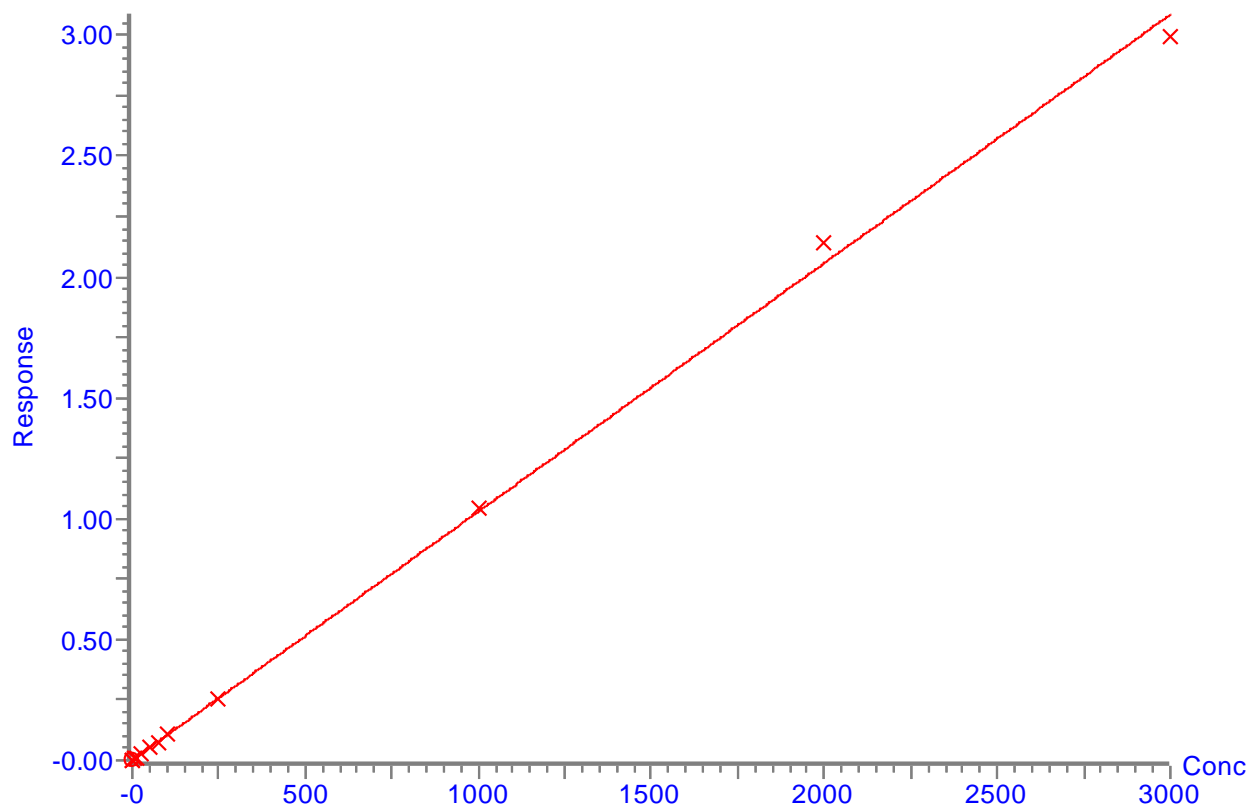

| 12 (Z)-Conjugated Linoleic acid |                  |          |        |      |          |
|---------------------------------|------------------|----------|--------|------|----------|
|                                 | Std Conc (ng/mL) | Response | Conc.  | %Dev | S/N      |
| 1                               | 5                | 0.006    | 5.1    | 1.8  | 20.342   |
| 2                               | 7.5              | 0.009    | 7.9    | 4.9  | 49.527   |
| 3                               | 10               | 0.01     | 9.4    | -5.6 | 45.033   |
| 4                               | 25               | 0.026    | 24.5   | -1.9 | 130.461  |
| 5                               | 50               | 0.055    | 52.8   | 5.6  | 213.843  |
| 6                               | 75               | 0.077    | 74.1   | -1.1 | 187.888  |
| 7                               | 100              | 0.108    | 104.2  | 4.2  | 273.089  |
| 8                               | 250              | 0.254    | 246.3  | -1.5 | 346.345  |
| 9                               | 1000             | 1.044    | 1014.6 | 1.5  | 1455.32  |
| 10                              | 2000             | 2.138    | 2078.9 | 3.9  | 1053.672 |
| 11                              | 3000             | 2.991    | 2908.5 | -3   | 657.434  |

Compound name: Oleic acid

Correlation coefficient:  $r = 0.999328$ ,  $r^2 = 0.998656$

Calibration curve:  $0.007765 * x + 0.014601$

Response type: Internal Std ( Ref 2 ), Area \* ( IS Conc. / IS Area )

Curve type: Linear, Origin: Exclude, Weighting: 1/x, Axis trans: None

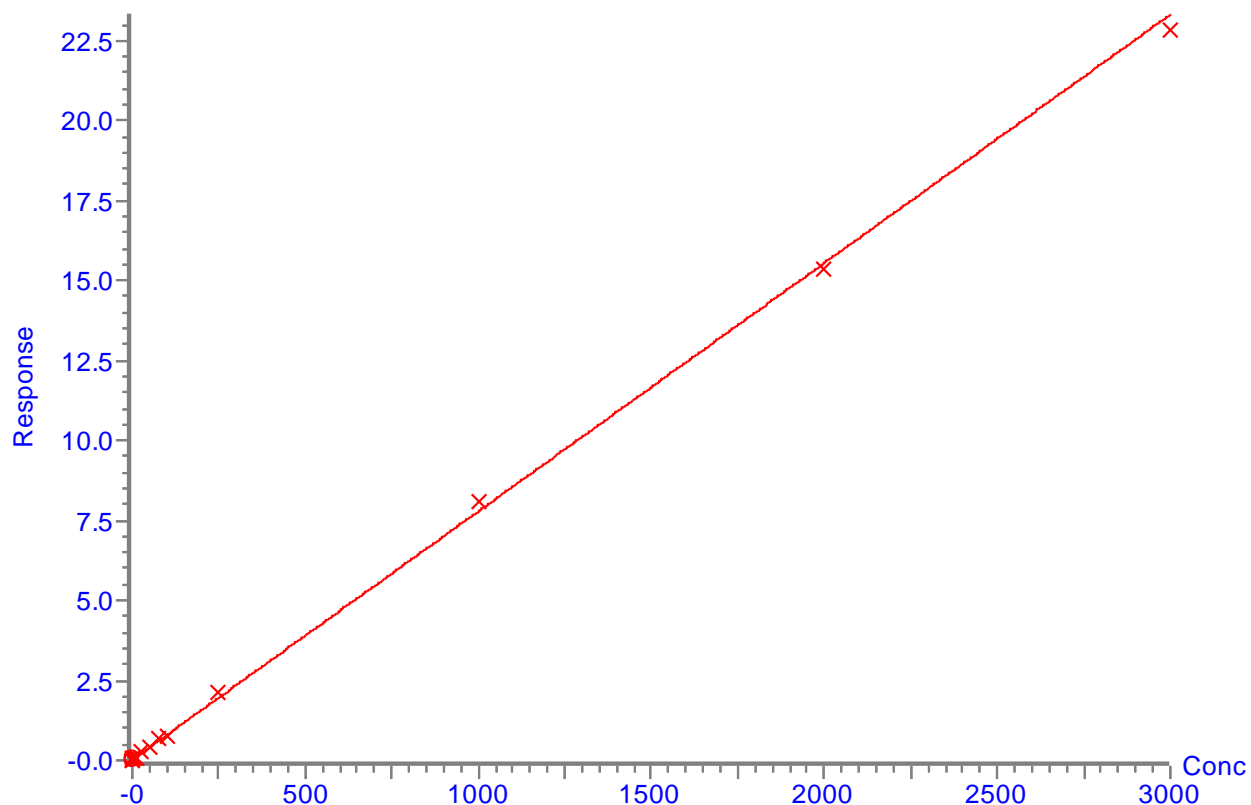

| Oleic acid/ Elaidic acid |                  |          |        |      |          |
|--------------------------|------------------|----------|--------|------|----------|
|                          | Std Conc (ng/mL) | Response | Conc.  | %Dev | S/N      |
| 1                        | 0.5              | 0.019    | 0.5    | 8.9  | 54.504   |
| 2                        | 2.5              | 0.033    | 2.3    | -7.4 | 107.855  |
| 3                        | 5                | 0.064    | 6.4    | 27.6 | 208.393  |
| 4                        | 10               | 0.099    | 10.9   | 8.6  | 343.074  |
| 5                        | 50               | 0.434    | 54     | 7.9  | 1273.842 |
| 6                        | 75               | 0.677    | 85.3   | 13.8 | 1560.042 |
| 7                        | 100              | 0.773    | 97.7   | -2.3 | 2213.919 |
| 8                        | 250              | 2.125    | 271.8  | 8.7  | 2916.637 |
| 9                        | 1000             | 8.097    | 1040.9 | 4.1  | 9092.642 |
| 10                       | 2000             | 15.362   | 1976.5 | -1.2 | 8931.033 |
| 11                       | 3000             | 22.846   | 2940.3 | -2   | 4990.092 |

Compound name: Stearic acid

Correlation coefficient:  $r = 0.998386$ ,  $r^2 = 0.996774$

Calibration curve:  $0.0115371 * x + 0.118623$

Response type: Internal Std ( Ref 2 ), Area \* ( IS Conc. / IS Area )

Curve type: Linear, Origin: Exclude, Weighting:  $1/x$ , Axis trans: None

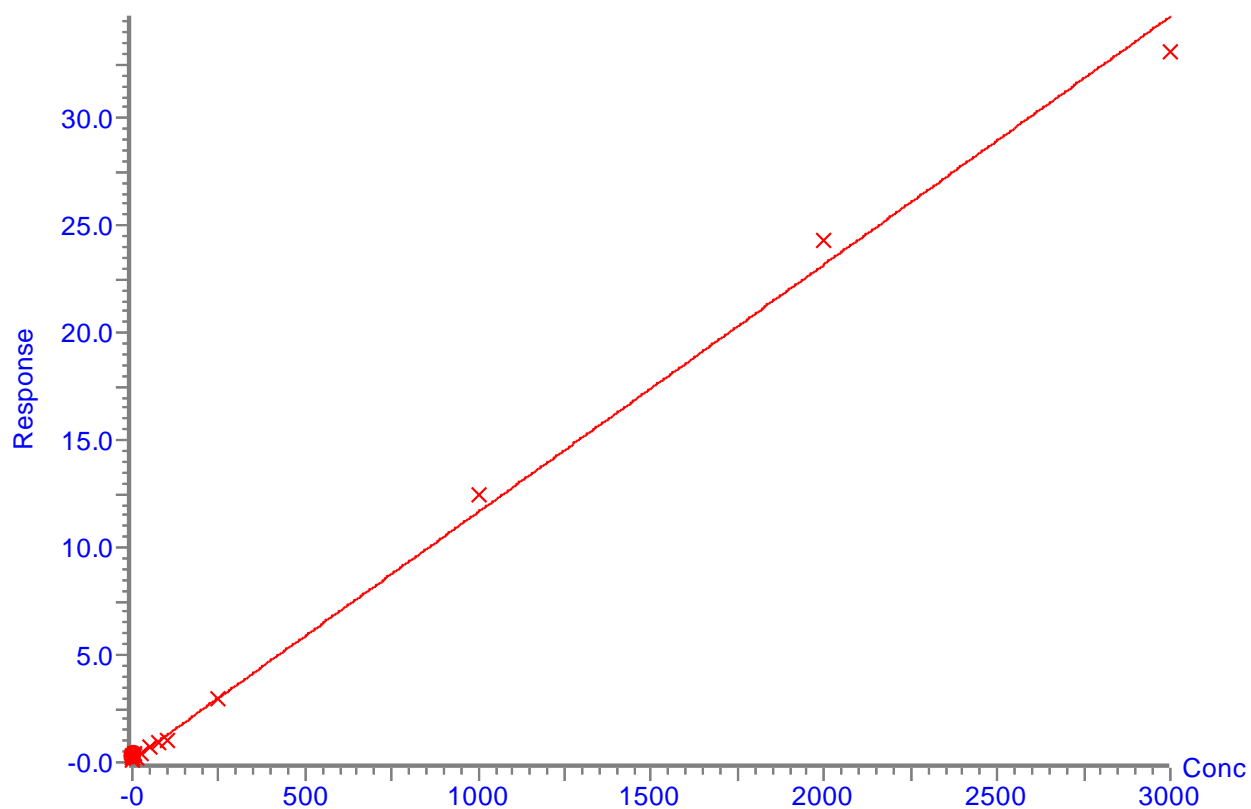

| Stearic acid |                  |          |        |       |           |
|--------------|------------------|----------|--------|-------|-----------|
|              | Std Conc (ng/mL) | Response | Conc.  | %Dev  | S/N       |
| 1            | 10               | 0.227    | 9.4    | -6.1  | 679.262   |
| 2            | 25               | 0.458    | 29.4   | 17.5  | 1529.29   |
| 3            | 50               | 0.717    | 51.9   | 3.7   | 2615.256  |
| 4            | 75               | 0.964    | 73.3   | -2.3  | 2451.263  |
| 5            | 100              | 1.022    | 78.3   | -21.7 | 2472.615  |
| 6            | 250              | 2.967    | 246.9  | -1.2  | 2744.846  |
| 7            | 1000             | 12.422   | 1066.4 | 6.6   | 12633.493 |
| 8            | 2000             | 24.27    | 2093.4 | 4.7   | 12328.398 |
| 9            | 3000             | 33.125   | 2860.9 | -4.6  | 8414.797  |

Compound name: 9-Cis Retinoic acid

Correlation coefficient:  $r = 0.999836$ ,  $r^2 = 0.999673$

Calibration curve:  $0.0137313 * x + 0.00204714$

Response type: Internal Std ( Ref 2 ), Area \* ( IS Conc. / IS Area )

Curve type: Linear, Origin: Exclude, Weighting: 1/x, Axis trans: None

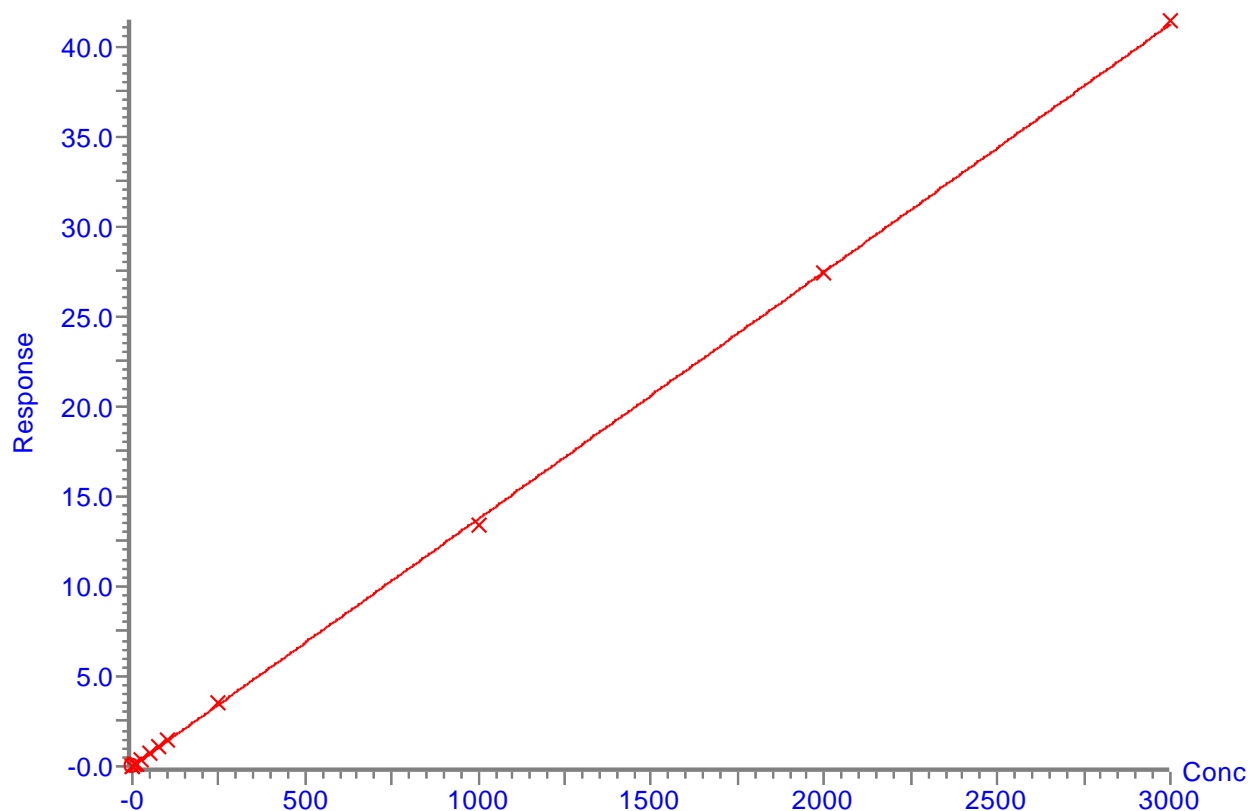

| ATRA/9-cis RA* |                  |          |        |      |          |
|----------------|------------------|----------|--------|------|----------|
|                | Std Conc (ng/mL) | Response | Conc.  | %Dev | S/N      |
| 1              | 5                | 0.076    | 5.4    | 7.6  | 328.88   |
| 2              | 7.5              | 0.105    | 7.5    | -0.4 | 593.677  |
| 3              | 10               | 0.133    | 9.5    | -4.9 | 700.496  |
| 4              | 25               | 0.343    | 24.8   | -0.8 | 715.793  |
| 5              | 50               | 0.753    | 54.7   | 9.3  | 2072.766 |
| 6              | 75               | 1.059    | 77     | 2.6  | 2585.369 |
| 7              | 100              | 1.47     | 106.9  | 6.9  | 3202.88  |
| 8              | 250              | 3.536    | 257.3  | 2.9  | 4272.171 |
| 9              | 1000             | 13.351   | 972.2  | -2.8 | 4385.433 |
| 10             | 2000             | 27.356   | 1992.1 | -0.4 | 5731.976 |
| 11             | 3000             | 41.405   | 3015.2 | 0.5  | 7656.861 |

Compound name: Eicosapentoic acid

Correlation coefficient:  $r = 0.999242$ ,  $r^2 = 0.998485$

Calibration curve:  $0.00061325 * x + 0.00182942$

Response type: Internal Std ( Ref 2 ), Area \* ( IS Conc. / IS Area )

Curve type: Linear, Origin: Exclude, Weighting: 1/x, Axis trans: None

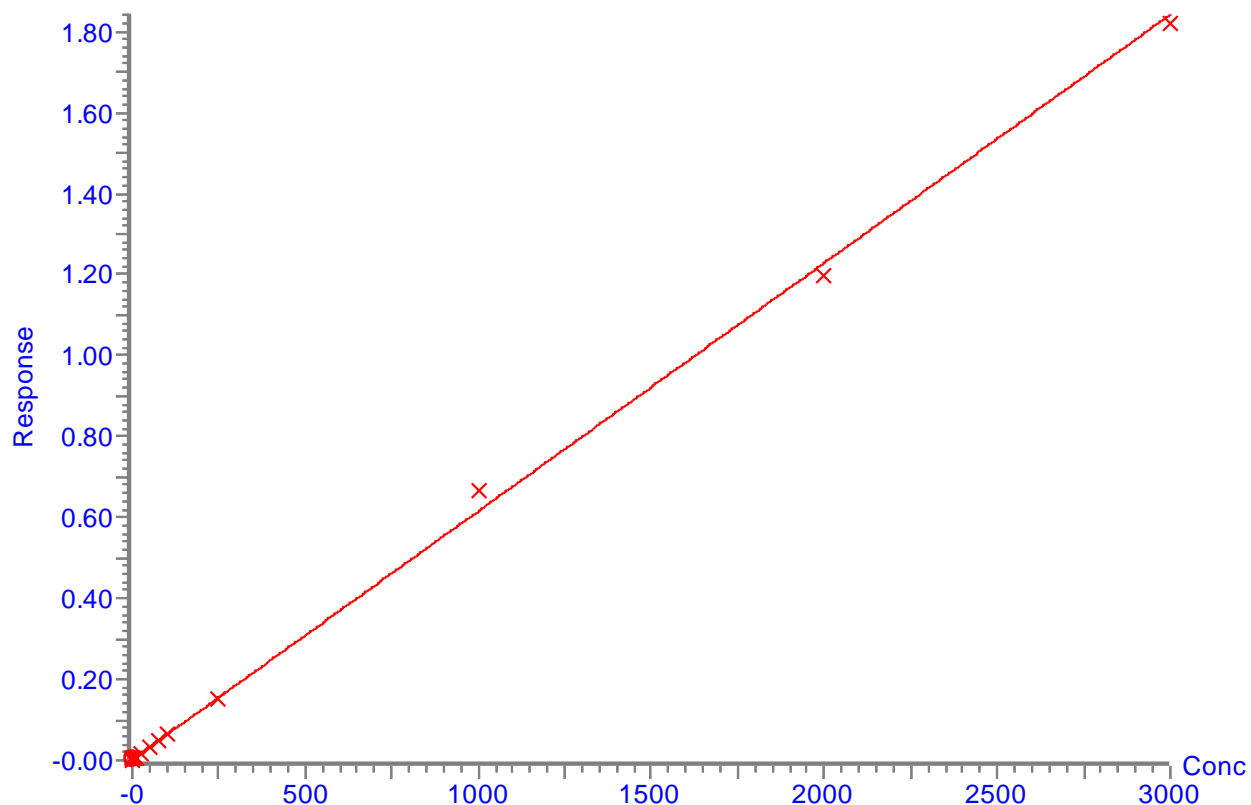

| Eicosapentoic acid |                  |          |        |      |         |
|--------------------|------------------|----------|--------|------|---------|
|                    | Std Conc (ng/mL) | Response | Conc.  | %Dev | S/N     |
| 1                  | 5                | 0.005    | 4.7    | -5.2 | 11.69   |
| 2                  | 7.5              | 0.006    | 7.3    | -2.5 | 18.975  |
| 3                  | 10               | 0.008    | 9.5    | -5.3 | 22.926  |
| 4                  | 50               | 0.034    | 52.8   | 5.6  | 70.393  |
| 5                  | 100              | 0.065    | 103.1  | 3.1  | 94.996  |
| 6                  | 250              | 0.153    | 247    | -1.2 | 240.832 |
| 7                  | 1000             | 0.668    | 1087.1 | 8.7  | 501.716 |
| 8                  | 2000             | 1.198    | 1950.7 | -2.5 | 573.391 |
| 9                  | 3000             | 1.817    | 2960.6 | -1.3 | 766.304 |

Compound name: Arachidonic acid

Correlation coefficient:  $r = 0.997152$ ,  $r^2 = 0.994312$

Calibration curve:  $0.000244034 * x + 0.0023204$

Response type: Internal Std ( Ref 2 ), Area \* ( IS Conc. / IS Area )

Curve type: Linear, Origin: Exclude, Weighting: 1/x, Axis trans: None

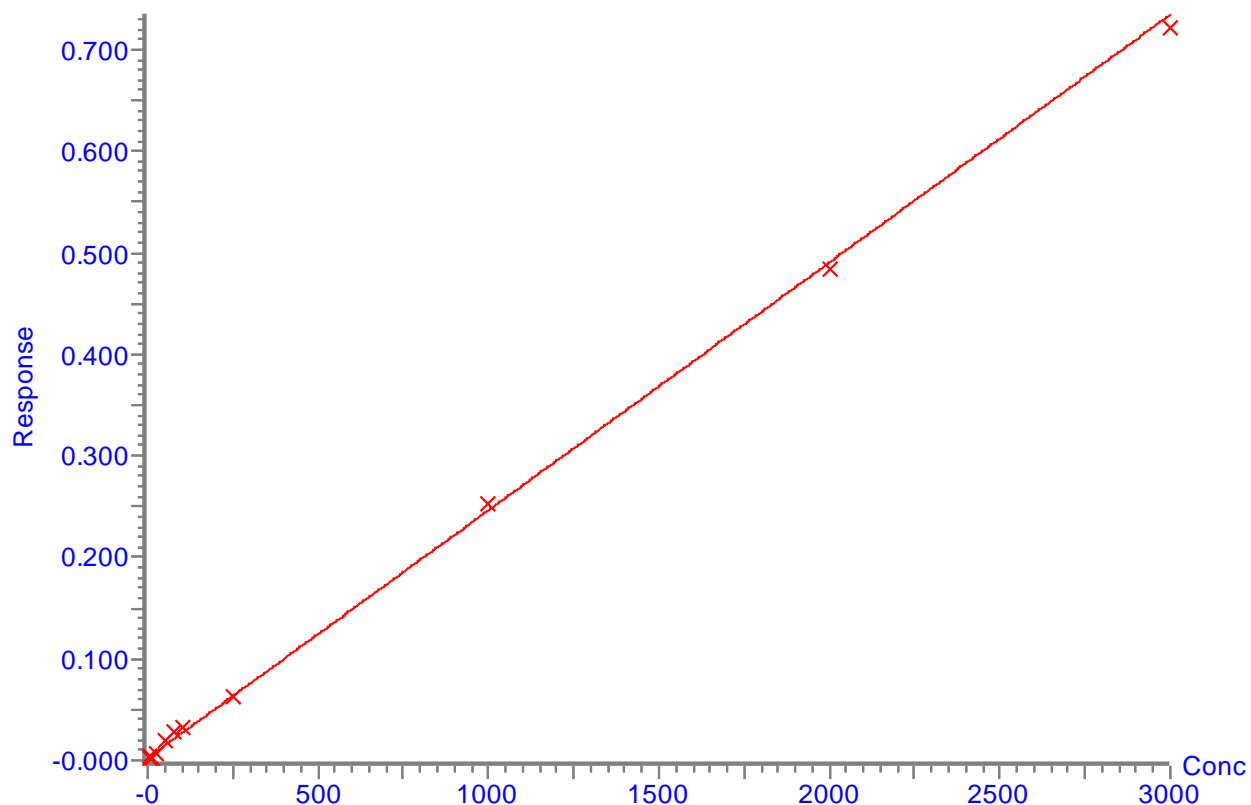

| Arachidonic acid |                  |          |        |       |         |
|------------------|------------------|----------|--------|-------|---------|
|                  | Std Conc (ng/mL) | Response | Conc.  | %Dev  | S/N     |
| 1                | 5                | 0.004    | 6.4    | 28.3  | 19.804  |
| 2                | 25               | 0.007    | 20.5   | -17.9 | 46.666  |
| 3                | 100              | 0.033    | 125    | 25    | 86.985  |
| 4                | 250              | 0.062    | 246    | -1.6  | 215.079 |
| 5                | 1000             | 0.253    | 1026.5 | 2.7   | 334.591 |
| 6                | 2000             | 0.483    | 1970.7 | -1.5  | 426.774 |
| 7                | 3000             | 0.721    | 2944.6 | -1.8  | 382.969 |



Compound name: Cis-11-Eicosenoic acid

Correlation coefficient:  $r = 0.998829$ ,  $r^2 = 0.997660$

Calibration curve:  $0.00606426 * x + 0.0371558$

Response type: Internal Std ( Ref 2 ), Area \* ( IS Conc. / IS Area )

Curve type: Linear, Origin: Exclude, Weighting: 1/x, Axis trans: None

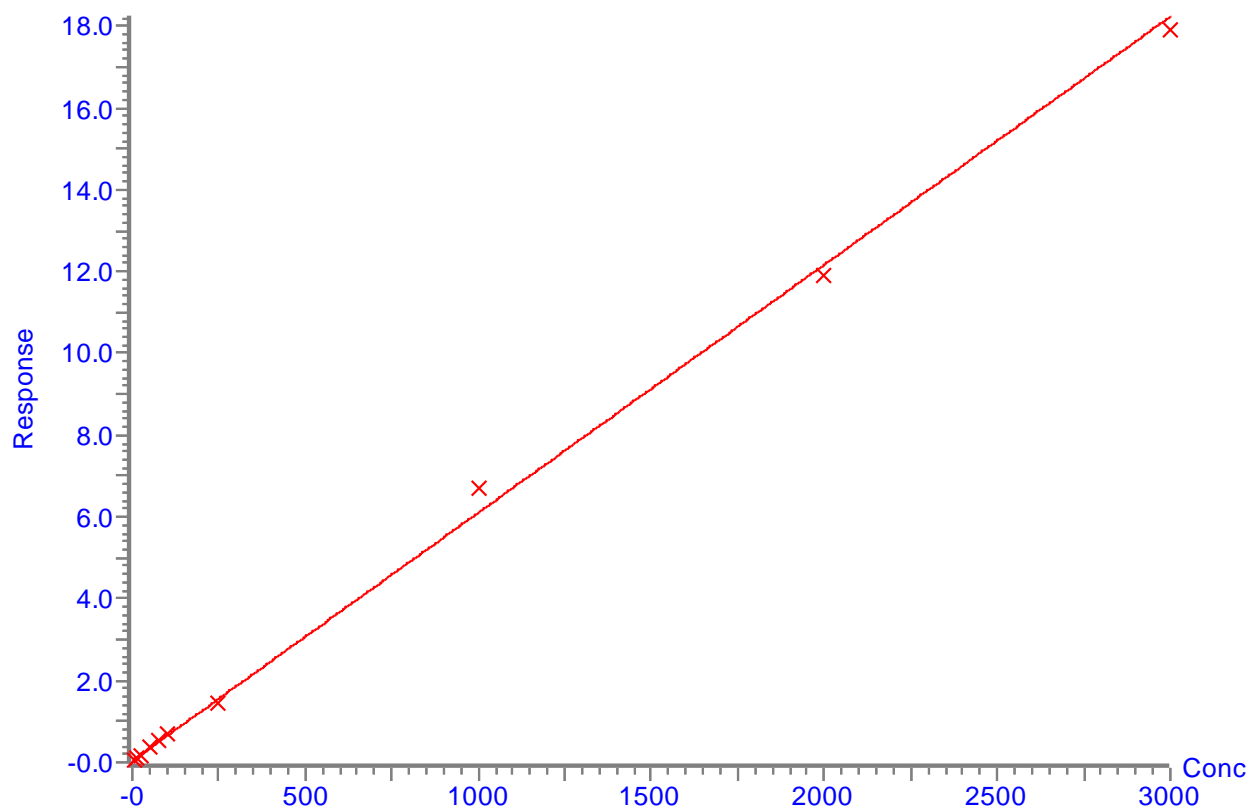

| Cis-11-Eicosenoic acid |                  |          |        |       |          |
|------------------------|------------------|----------|--------|-------|----------|
|                        | Std Conc (ng/mL) | Response | Conc.  | %Dev  | S/N      |
| 1                      | 5                | 0.062    | 4.1    | -18.8 | 36.156   |
| 2                      | 10               | 0.099    | 10.2   | 2.5   | 257.704  |
| 3                      | 50               | 0.372    | 55.2   | 10.5  | 393.266  |
| 4                      | 75               | 0.523    | 80.1   | 6.7   | 871.83   |
| 5                      | 100              | 0.687    | 107.2  | 7.2   | 598.323  |
| 6                      | 250              | 1.45     | 233    | -6.8  | 689.51   |
| 7                      | 1000             | 6.708    | 1099.9 | 10    | 2895.52  |
| 8                      | 2000             | 11.891   | 1954.7 | -2.3  | 3528.598 |
| 9                      | 3000             | 17.905   | 2946.5 | -1.8  | 2713.495 |

Compound name: Docosahexanoic acid

Correlation coefficient:  $r = 0.999459$ ,  $r^2 = 0.998918$

Calibration curve:  $0.00330324 * x + 0.0268456$

Response type: Internal Std ( Ref 2 ), Area \* ( IS Conc. / IS Area )

Curve type: Linear, Origin: Exclude, Weighting: 1/x, Axis trans: None

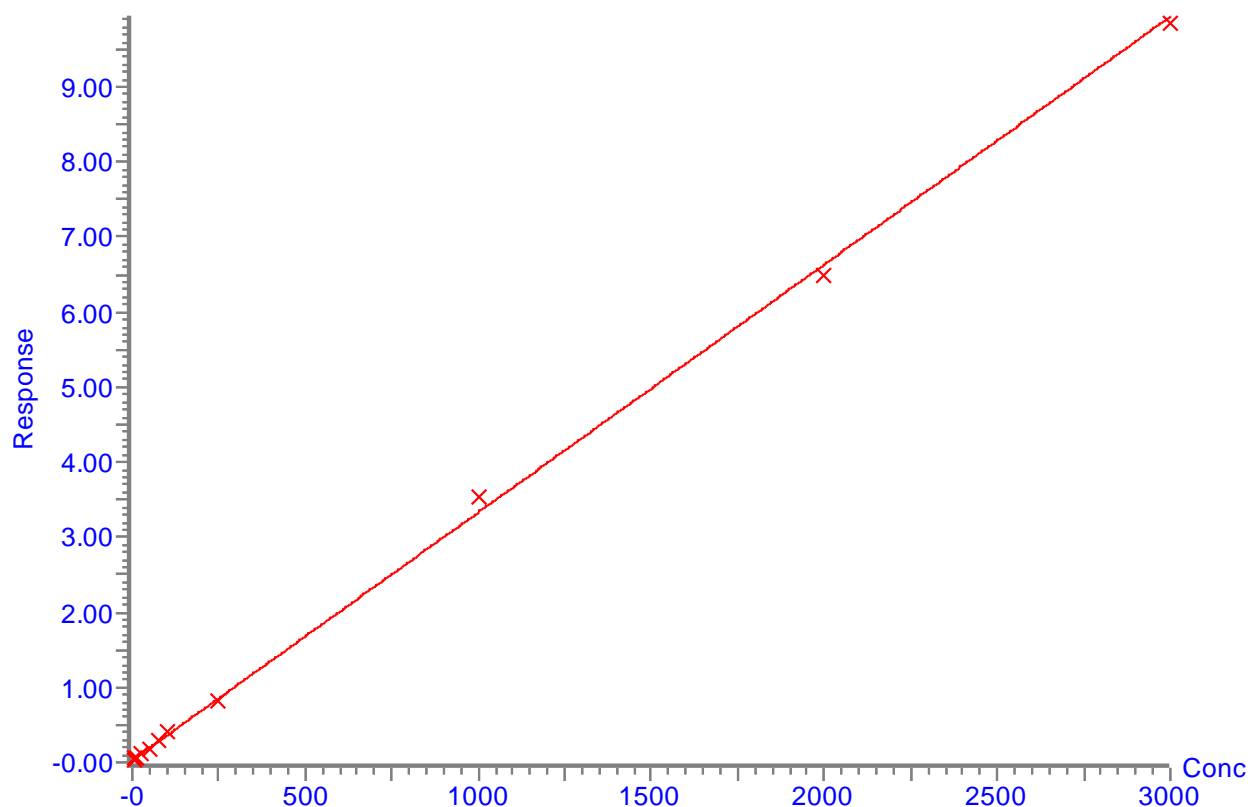

| Docosahexanoic acid |                  |          |        |       |          |
|---------------------|------------------|----------|--------|-------|----------|
|                     | Std Conc (ng/mL) | Response | Conc.  | %Dev  | S/N      |
| 1                   | 5                | 0.041    | 4.3    | -14.4 | 122.235  |
| 2                   | 7.5              | 0.051    | 7.3    | -3.3  | 133.223  |
| 3                   | 10               | 0.06     | 10     | -0.3  | 175.761  |
| 4                   | 25               | 0.109    | 24.8   | -0.9  | 178.293  |
| 5                   | 50               | 0.19     | 49.3   | -1.3  | 409.613  |
| 6                   | 100              | 0.395    | 111.6  | 11.6  | 618.861  |
| 7                   | 250              | 0.826    | 242    | -3.2  | 1181.065 |
| 8                   | 1000             | 3.523    | 1058.3 | 5.8   | 3092.259 |
| 9                   | 2000             | 6.491    | 1957   | -2.1  | 3529.447 |
| 10                  | 3000             | 9.858    | 2976.3 | -0.8  | 2172.369 |

Compound name: Heneicosanoic acid

Correlation coefficient:  $r = 0.999456$ ,  $r^2 = 0.998913$

Calibration curve:  $0.00305218 * x + 0.0109285$

Response type: Internal Std ( Ref 2 ), Area \* ( IS Conc. / IS Area )

Curve type: Linear, Origin: Exclude, Weighting: 1/x, Axis trans: None

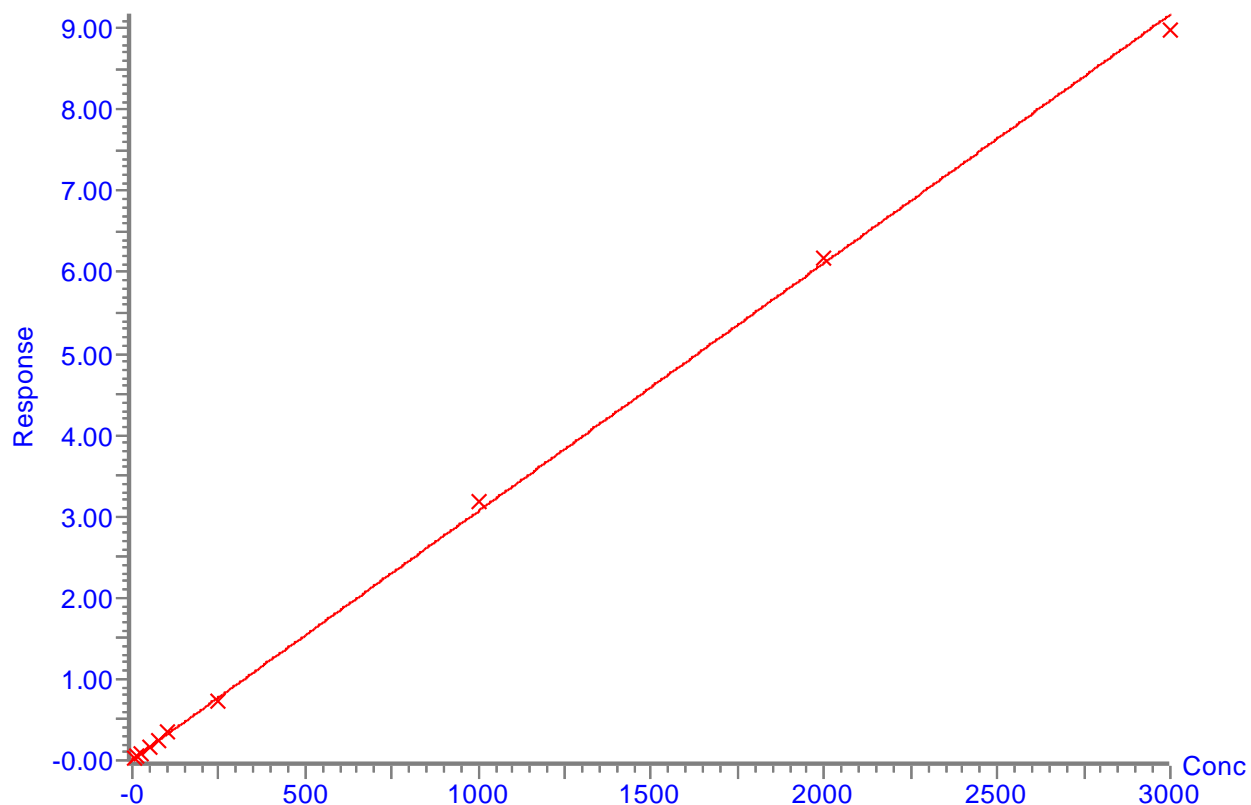

| Heneicosanoic acid |                  |          |        |       |          |
|--------------------|------------------|----------|--------|-------|----------|
|                    | Std Conc (ng/mL) | Response | Conc.  | %Dev  | S/N      |
| 1                  | 5                | 0.023    | 3.9    | -21.1 | 118.01   |
| 2                  | 7.5              | 0.031    | 6.7    | -11.3 | 72.407   |
| 3                  | 10               | 0.044    | 10.7   | 6.9   | 117.077  |
| 4                  | 25               | 0.093    | 26.9   | 7.7   | 242.978  |
| 5                  | 50               | 0.162    | 49.5   | -1    | 350.94   |
| 6                  | 75               | 0.254    | 79.8   | 6.4   | 615.026  |
| 7                  | 100              | 0.364    | 115.5  | 15.5  | 826.18   |
| 8                  | 250              | 0.73     | 235.8  | -5.7  | 2347.317 |
| 9                  | 1000             | 3.178    | 1037.8 | 3.8   | 6827.286 |
| 10                 | 2000             | 6.166    | 2016.7 | 0.8   | 9642.639 |
| 11                 | 3000             | 8.982    | 2939.2 | -2    | 5897.276 |

Compound name: Erucic acid

Correlation coefficient:  $r = 0.999371$ ,  $r^2 = 0.998743$

Calibration curve:  $0.00769466 * x + 0.0538197$

Response type: Internal Std ( Ref 2 ), Area \* ( IS Conc. / IS Area )

Curve type: Linear, Origin: Exclude, Weighting:  $1/x$ , Axis trans: None

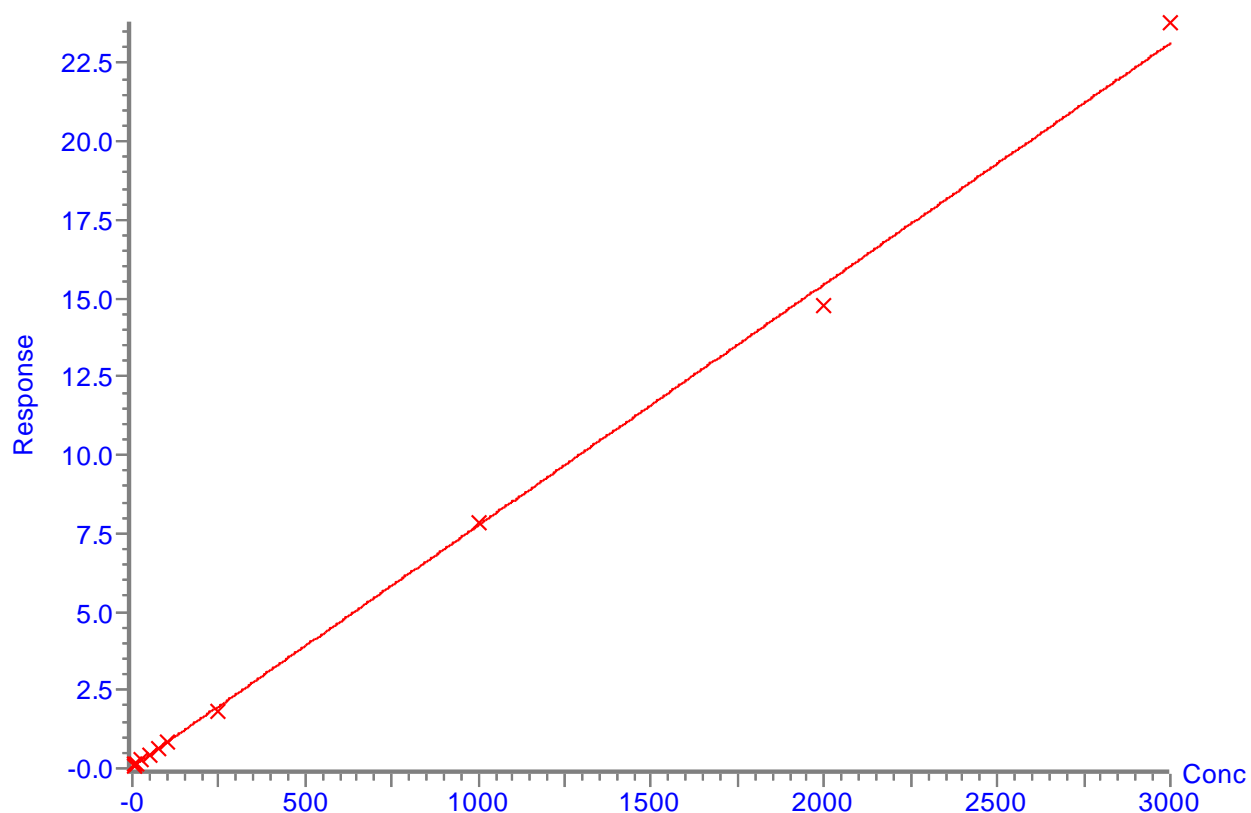

| Erucic acid |                  |          |        |      |           |
|-------------|------------------|----------|--------|------|-----------|
|             | Std Conc (ng/mL) | Response | Conc.  | %Dev | S/N       |
| 1           | 5                | 0.091    | 4.9    | -2.3 | 558.851   |
| 2           | 7.5              | 0.11     | 7.3    | -2.5 | 492.309   |
| 3           | 10               | 0.126    | 9.4    | -5.5 | 445.142   |
| 4           | 25               | 0.272    | 28.4   | 13.4 | 1750.-    |
| 5           | 50               | 0.44     | 50.2   | 0.5  | 2770.539  |
| 6           | 75               | 0.636    | 75.6   | 0.8  | 2446.582  |
| 7           | 100              | 0.846    | 103    | 3    | 5774.891  |
| 8           | 250              | 1.843    | 232.6  | -7   | 4391.293  |
| 9           | 1000             | 7.833    | 1011   | 1.1  | 30413.483 |
| 10          | 2000             | 14.791   | 1915.2 | -4.2 | 13979.304 |
| 11          | 3000             | 23.791   | 3084.9 | 2.8  | 15593.152 |

Compound name: 2-Phenyl-2-propyl-succinic acid  
 Correlation coefficient:  $r = 0.999212$ ,  $r^2 = 0.998424$   
 Calibration curve:  $9.82132 \times 10^{-5} \cdot x + 0.00588662$   
 Response type: Internal Std ( Ref 2 ), Area \* ( IS Conc. / IS Area )  
 Curve type: Linear, Origin: Exclude, Weighting: 1/x, Axis trans: None

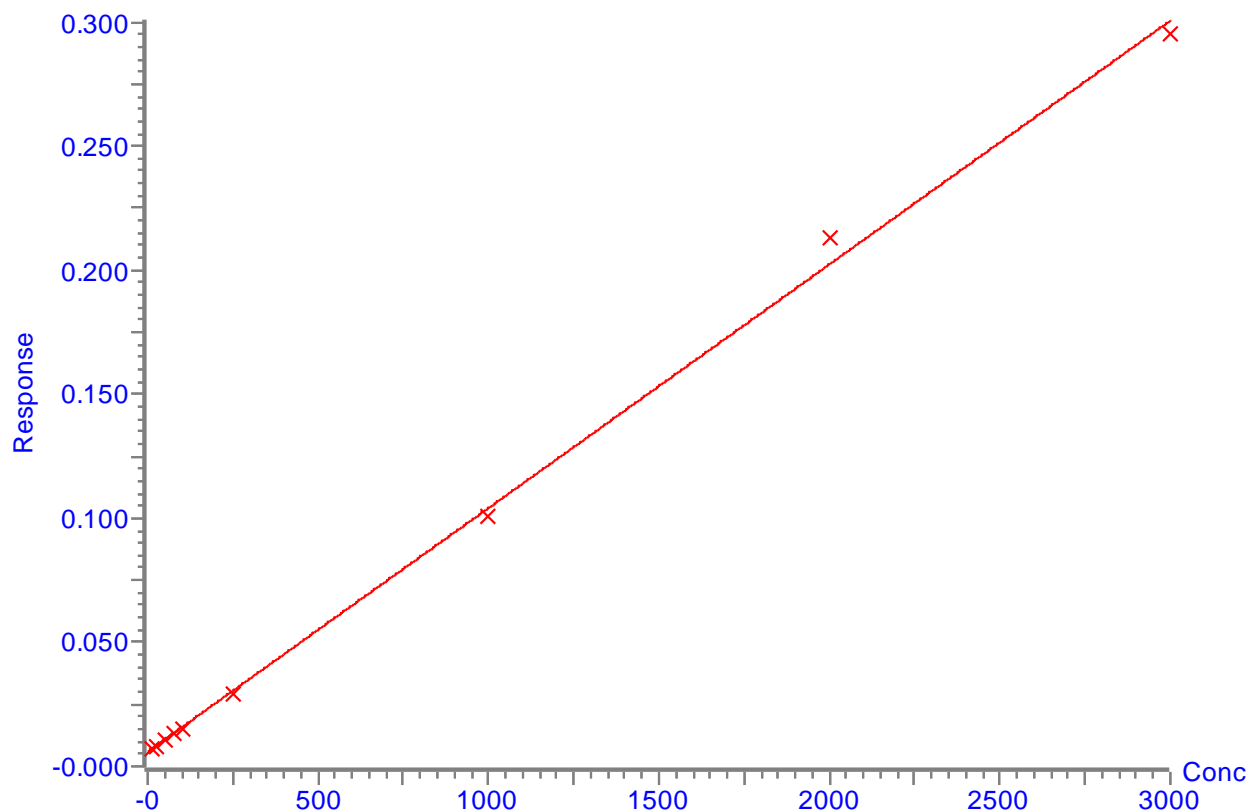

|   | Std Conc (ng/mL) | Response | Conc.  | %Dev | S/N      |
|---|------------------|----------|--------|------|----------|
| 1 | 10               | 0.007    | 11.7   | 17.5 | 39.249   |
| 2 | 25               | 0.008    | 23.2   | -7.2 | 198.082  |
| 3 | 50               | 0.011    | 51.2   | 2.4  | 164.202  |
| 4 | 75               | 0.013    | 74.5   | -0.7 | 311.305  |
| 5 | 100              | 0.015    | 92.7   | -7.3 | 69.705   |
| 6 | 250              | 0.029    | 237.2  | -5.1 | 380.154  |
| 7 | 1000             | 0.101    | 968.9  | -3.1 | 1860.709 |
| 8 | 2000             | 0.213    | 2108.3 | 5.4  | 849.824  |
| 9 | 3000             | 0.295    | 2942.2 | -1.9 | 1910.75  |

## List of acronyms

1. MRM- multiple reaction monitoring
2. TCA- tricarboxylic acid
3. CA- carboxylic acid
4. CV- coefficient of variation
5. 4-Cl-OPD- 4-Chloro-*o*-phenylenediamine
6. OPD- *o*-phenylenediamine
7. NIST- National Institute of Standards and Technology
8. CID- collision induced dissociation
9. RSD- relative standard deviation
10. RT- retention time
11. LOD- limit of detection
12. S/N ratio- signal to noise ratio
13. CCM-carboxylic containing metabolite

Supplementary Table S4. List of dysregulated CCMs (carbon containing metabolites) in pancreatic cancer cell lines (PANC-1 and PPCL68 individually as well as combined) when compared to normal pancreatic epithelial cells (HPDE and HPNE individually as well as combined).

|                                 | cancer vs normal |          |            | PANC1 vs HPNE |        |          | PANC1 vs HPDE |           |        | PPCL68 vs HPNE |          |           | PPCL68 vs HPDE |          |          |
|---------------------------------|------------------|----------|------------|---------------|--------|----------|---------------|-----------|--------|----------------|----------|-----------|----------------|----------|----------|
|                                 | FC               | log2(FC) | FDR        | log10(FD)     | FC     | log2(FC) | FDR           | log10(FD) | FC     | log2(FC)       | FDR      | log10(FD) | FC             | log2(FC) | FDR      |
| Arachidonic acid                | 8.848            | 3.1454   | 9.03E-12   | 11.044        | 6.5316 | 2.7074   | 6.15E-06      | 5.2109    | 7.7749 | 2.9588         | 8.83E-06 | 5.0538    | 9.7498         | 3.2854   | 2.20E-06 |
| Palmitoleic acid                | 2.354            | 1.2354   | 8.41E-09   | 8.0753        | 2.7821 | 1.4762   | 6.15E-06      | 5.2109    | 2.125  | 1.0875         | 5.13E-05 | 4.2902    | 2.6548         | 1.4086   | 4.43E-05 |
| Docosahexanoic acid             | 2.636            | 1.3984   | 1.06E-08   | 7.9763        | 3.2489 | 1.6999   | 3.33E-06      | 5.477     | 2.4903 | 1.3163         | 0.000131 | 3.8831    | 2.8264         | 1.499    | 4.43E-05 |
| Oleic acid                      | 4.119            | 2.0421   | 4.15E-08   | 7.3821        | 7.0423 | 2.816    | 4.07E-06      | 5.3905    | 4.1668 | 2.0589         | 0.000109 | 3.9631    | 4.037          | 2.0133   | 8.86E-07 |
| Oxaloacetic acid                | 2.876            | 1.524    | 4.63E-08   | 7.3344        | 2.4067 | 1.2671   | 0.000127      | 3.8956    | 4.1614 | 2.0571         | 8.34E-06 | 5.0789    | 2.1324         | 1.0925   | 0.000351 |
| Elaidic acid                    | 4.277            | 2.0967   | 7.54E-07   | 6.1228        | 8.3357 | 3.0593   | 3.33E-06      | 5.477     | 4.456  | 2.1558         | 6.12E-05 | 4.213     | 3.943          | 1.9793   | 2.04E-05 |
| Henicosanoic acid               | 3.62             | 1.856    | 2.15E-06   | 5.6678        | 5.5035 | 2.4604   | 6.15E-06      | 5.2109    | 2.1032 | 1.0726         | 0.001176 | 2.9297    | 7.5889         | 2.9239   | 2.00E-06 |
| Glutamine                       | 2.038            | 1.0269   | 1.08E-05   | 4.9665        | 1.7116 | 0.77531  | 0.001996      | 2.6999    | 2.8387 | 1.5052         | 1.06E-05 | 4.9761    | 1.5546         | 0.63651  | 0.019341 |
| 2-oxo-butiric acid              | 2.207            | 1.1418   | 3.27E-05   | 4.4858        | 2.1797 | 1.1241   | 0.00224       | 2.6498    | 2.9299 | 1.5509         | 5.39E-06 | 5.2683    | 1.6685         | 0.73859  | 0.077597 |
| Adipic acid                     | 1.785            | 0.83628  | 3.27E-05   | 4.4858        | 1.4789 | 0.56456  | 0.021064      | 1.6765    | 2.1489 | 1.1036         | 0.000716 | 3.1448    | 1.5353         | 0.61852  | 0.003681 |
| Linoleic acid                   | 2.717            | 1.4418   | 3.27E-05   | 4.4858        | 2.9305 | 1.5511   | 0.000355      | 3.4498    | 1.6218 | 0.69758        | 0.004771 | 2.3214    | 4.6951         | 2.2312   | 0.000341 |
| Arginine                        | 2.404            | 1.2655   | 4.93E-05   | 4.307         | 1.6323 | 0.70689  | 0.012714      | 1.8957    | 2.9922 | 1.5812         | 8.32E-05 | 4.0801    | 2.0834         | 1.0589   | 0.019132 |
| Gluconic acid                   | 3.386            | 1.7595   | 4.93E-05   | 4.307         | 3.2123 | 1.6836   | 0.007092      | 2.1493    | 4.4731 | 2.1613         | 1.06E-05 | 4.9761    | 2.605          | 1.3813   | 0.050999 |
| Heptadecanoic acid              | 3.543            | 1.8248   | 5.07E-05   | 4.2948        | 2.5638 | 1.3583   | 0.012714      | 1.8957    | 2.4705 | 1.304          | 0.015628 | 1.8061    | 4.6551         | 2.2188   | 0.000894 |
| 9-Cis Retinoic acid             | 2.119            | 1.0838   | 5.34E-05   | 4.2722        | 2.0455 | 1.0324   | 0.007164      | 2.1449    | 2.073  | 1.0517         | 0.004483 | 2.316     | 2.1641         | 1.1138   | 0.013582 |
| Alpha-keto glutaric acid        | 2.218            | 1.1492   | 5.34E-05   | 4.2722        | 1.703  | 0.76809  | 0.006192      | 2.2082    | 3.1184 | 1.6408         | 0.000459 | 3.338     | 1.7262         | 0.78757  | 0.014897 |
| Dodecanedioic acid              | 1.679            | 0.74785  | 5.34E-05   | 4.2722        | 2.3551 | 1.2358   | 6.15E-06      | 5.2109    | 1.5127 | 0.59708        | 0.008392 | 2.0761    | 1.9387         | 0.95512  | 6.29E-05 |
| Valine                          | 1.542            | 0.62498  | 6.47E-05   | 4.189         | 1.5948 | 0.67336  | 0.007164      | 2.1449    | 1.3145 | 0.39448        | 0.013874 | 1.8578    | 1.8185         | 0.86273  | 0.002142 |
| Mevalonic acid                  | 0.509            | -0.97563 | 7.35E-05   | 4.1335        | 0.5136 | -0.96122 | 0.007282      | 2.1378    | 0.5905 | -0.75996       | 0.010964 | 1.96      | 0.4372         | -1.1936  | 0.006269 |
| Glutamic acid                   | 1.752            | 0.80897  | 9.52E-05   | 4.0214        | 1.5483 | 0.63071  | 0.004351      | 2.3614    | 2.3058 | 1.2052         | 0.000292 | 3.5349    | 1.3801         | 0.46475  | 0.065899 |
| Succinic acid                   | 1.701            | 0.76671  | 9.52E-05   | 4.0214        | 1.5974 | 0.67573  | 0.009749      | 2.0111    | 2.1445 | 1.1006         | 0.000716 | 3.1448    | 1.3713         | 0.45557  | 0.060181 |
| Homocysteine                    | 3.664            | 1.8734   | 9.76E-05   | 4.0104        | 3.2328 | 1.6928   | 0.005799      | 2.2366    | 5.935  | 2.5692         | 1.06E-05 | 4.9761    | 2.4271         | 1.2792   | 0.11242  |
| Alanine                         | 1.431            | 0.51708  | 0.00012475 | 3.9039        | 1.504  | 0.58876  | 0.007917      | 2.1014    | 1.4068 | 0.49247        | 0.002726 | 2.0822    | 1.4569         | 0.54293  | 0.015451 |
| N-Acetyl glutamine              | 1.9              | 0.92617  | 0.00012475 | 3.9039        | 2.3038 | 1.204    | 0.000671      | 3.1733    | 1.5725 | 0.65304        | 0.003448 | 1.4888    | 2.3804         | 1.2512   | 0.000299 |
| Hydroxy Myristic acid           | 2.212            | 1.1454   | 0.00012962 | 3.8873        | 2.2737 | 1.185    | 0.004034      | 2.3943    | 3.1549 | 1.6576         | 0.000369 | 3.433     | 1.5326         | 0.61598  | 0.11242  |
| 2/3-Hydroxy Dodecanoic acid     | 3.891            | 1.9603   | 0.00014392 | 3.8419        | 4.2307 | 2.0809   | 0.001138      | 2.9437    | 5.9867 | 2.5818         | 3.35E-05 | 4.4747    | 2.4107         | 1.2695   | 0.13352  |
| Pyruvic acid                    | 1.393            | 0.47781  | 0.00014392 | 3.8419        | 1.3804 | 0.46507  | 0.016538      | 1.7815    | 1.3295 | 0.41091        | 0.012411 | 1.9062    | 1.4581         | 0.54413  | 0.013964 |
| 2-Phenyl-2-propyl-succinic acid | 3.453            | 1.7878   | 0.00014625 | 3.8349        | 3.9655 | 1.9875   | 0.00224       | 2.6498    | 1.6411 | 0.71465        | 0.0982   | 1.0079    | 7.8305         | 2.9691   | 0.000351 |
| Ornithine                       | 0.525            | -0.9284  | 0.00019489 | 3.7102        | 0.4972 | -1.0081  | 0.009304      | 2.0313    | 0.5866 | -0.76959       | 0.021922 | 1.6591    | 0.4736         | -1.0782  | 0.012067 |
| Eicosapentenoic acid            | 2.73             | 1.449    | 0.00022661 | 3.6447        | 7.7616 | 2.9563   | 4.06E-05      | 4.3911    | 1.9167 | 0.93662        | 0.000109 | 3.9631    | 6.0244         | 2.5908   | 0.000174 |
| Pentadecanoic acid              | 1.629            | 0.70382  | 0.0002689  | 3.5704        | 2.6033 | 1.3803   | 5.28E-06      | 5.2776    | 1.4811 | 0.58669        | 0.002094 | 2.6791    | 1.8884         | 0.91715  | 2.04E-05 |
| Hydroxy Palmitic acid           | 3.037            | 1.6027   | 0.00029919 | 3.5241        | 3.2578 | 1.7039   | 0.009304      | 2.0313    | 4.383  | 2.1319         | 0.001677 | 2.7756    | 2.0366         | 1.0262   | 0.11086  |
| 3-NitroTyrosine                 | 2.178            | 1.1229   | 0.00031653 | 3.4996        | 2.3902 | 1.2571   | 0.005799      | 2.2366    | 1.4348 | 0.52081        | 0.14775  | 0.83047   | 3.4158         | 1.7722   | 0.000894 |
| Threonine                       | 1.859            | 0.89431  | 0.00032551 | 3.4874        | 1.4883 | 0.57362  | 0.016212      | 1.7902    | 2.3867 | 1.255          | 0.001834 | 2.7365    | 1.5295         | 0.61304  | 0.063956 |
| Sarcosine                       | 0.645            | -0.63342 | 0.00040312 | 3.3946        | 0.7259 | -0.46212 | 0.049299      | 1.3072    | 0.6851 | -0.54564       | 0.00272  | 2.5654    | 0.6018         | -0.73266 | 0.027351 |
| Asparagine                      | 0.536            | -0.90057 | 0.00048272 | 3.3163        | 0.5001 | -0.99962 | 0.012714      | 1.8957    | 0.58   | -0.78598       | 0.025451 | 1.5943    | 0.4975         | -1.0073  | 0.021946 |
| Stearic acid                    | 1.531            | 0.61449  | 0.00048272 | 3.3163        | 1.7742 | 0.82713  | 0.004354      | 2.3611    | 1.2534 | 0.32586        | 0.05747  | 1.2406    | 1.924          | 0.94408  | 0.003681 |
| Gamma-amino butyric acid        | 1.349            | 0.43145  | 0.00057463 | 3.2406        | 1.4285 | 0.51452  | 0.012148      | 1.9155    | 1.3159 | 0.39606        | 0.058643 | 1.2318    | 1.3841         | 0.46891  | 0.008177 |
| Palmitic acid                   | 1.546            | 0.6285   | 0.00066541 | 3.1769        | 2.311  | 1.2085   | 0.000186      | 3.7303    | 1.3431 | 0.42556        | 0.002098 | 2.6781    | 1.895          | 0.9222   | 0.001823 |
| Histamine                       | 1.329            | 0.40979  | 0.00096704 | 3.0146        | 1.2705 | 0.34543  | 0.023616      | 1.6268    | 1.4721 | 0.55792        | 0.001176 | 2.9297    | 1.2045         | 0.26845  | 0.21485  |
| Cis-11-Eicosenoic acid          | 2.546            | 1.3482   | 0.0009833  | 3.0073        | 12.713 | 3.6682   | 1.81E-06      | 5.7415    | 1.2943 | 0.37218        | 0.16134  | 0.79225   | 14.84          | 3.8914   | 8.86E-07 |
| Myristic acid                   | 1.356            | 0.43899  | 0.0013715  | 2.8628        | 1.4732 | 0.55892  | 0.018834      | 1.7251    | 1.3932 | 0.47836        | 0.025238 | 1.5979    | 1.316          | 0.39615  | 0.053722 |
| Heptadecanoic acid              | 1.828            | 0.87035  | 0.0014779  | 2.8304        | 2.9678 | 1.5694   | 0.000113      | 3.946     | 1.9206 | 0.94157        | 0.003774 | 2.4232    | 1.6851         | 0.75287  | 0.013964 |
| 4-methyl-2-Oxo-pentanoic acid   | 1.29             | 0.36721  | 0.0003173  | 2.5204        | 1.063  | 0.088149 | 0.53864       | 0.2687    | 1.3674 | 0.45139        | 0.000716 | 3.1448    | 1.2296         | 0.2982   | 0.13352  |
| Fumaric acid                    | 1.266            | 0.34039  | 0.0003173  | 2.5204        | 1.1379 | 0.18642  | 0.30449       | 0.51642   | 1.2729 | 0.34812        | 0.008392 | 2.0761    | 1.26           | 0.33344  | 0.10144  |
| 4-Hydroxy proline               | 0.699            | -0.51703 | 0.0031082  | 2.5075        | 0.667  | -0.58429 | 0.022387      | 1.65      | 0.7916 | -0.33719       | 0.13086  | 0.88318   | 0.6206         | -0.68818 | 0.024728 |
| Glyoxalic acid                  | 1.7              | 0.76528  | 0.0035744  | 2.4468        | 2.053  | 1.0377   | 0.009438      | 2.0251    | 2.3332 | 1.2223         | 0.005788 | 2.2375    | 1.1423         | 0.1919   | 0.27604  |
| Methyl adipic acid              | 1.208            | 0.27282  | 0.0037914  | 2.4212        | 1.2894 | 0.36672  | 0.013756      | 1.8615    | 1.2284 | 0.29674        | 0.052211 | 1.2822    | 1.187          | 0.24727  | 0.063956 |
| Docosatetraenoic acid           | 0.456            | -1.1321  | 0.0042389  | 2.3728        | 0.3859 | -1.3739  | 0.037749      | 1.4231    | 0.8116 | -0.3011        | 0.22754  | 0.64295   | 0.2873         | -1.7994  | 0.016242 |
| Cis-Aconitic acid               | 1.745            | 0.80315  | 0.010359   | 1.9847        | 0.969  | -0.04548 | 0.64382       | 0.19123   | 5.4082 | 2.4351         | 0.000128 | 3.8923    | 1.0886         | 0.12243  | 0.71117  |
| Ureidopropionic acid            | 0.728            | -0.45874 | 0.015418   | 1.812         | 0.6799 | -0.55666 | 0.057692      | 1.2389    | 0.8007 | -0.32074       | 0.23446  | 0.62992   | 0.6656         | -0.58726 | 0.051528 |
| Glycine                         | 1.452            | 0.53814  | 0.02261    | 1.6457        | 1.6572 | 0.72878  | 0.048303      | 1.316     | 1.8893 | 0.91783        | 0.014551 | 1.8371    | 1.0686         | 0.095734 | 0.70038  |
| Hippuric acid                   | 0.456            | -1.1327  | 0.029037   | 1.5371        | 0.4255 | -1.2328  | 0.057692      | 1.2389    | 0.4606 | -1.1184        | 0.23446  | 0.62992   | 0.4545         | -1.1376  | 0.092501 |
| 10-Undecenoic acid              | 1.341            | 0.42355  | 0.032812   | 1.484         | 1.1799 | 0.23865  | 0.5624        | 0.24996   | 1.4048 | 0.49038        | 0.16969  | 0.77034   | 1.2878         | 0.36492  | 0.14427  |
| Lactic acid                     | 0.8              | -0.3211  | 0.033188   | 1.479         | 0.915  | -0.12823 | 0.51258       | 0.29023   | 0.6318 | -0.66236       | 0.000658 | 3.1815    | 1.0446         | 0.062993 | 0.70038  |
| Oxalic acid                     | 1.358            | 0.44153  | 0.04644    | 1.3331        | 1.5508 | 0.63303  | 0.005299      | 2.2758    | 1.631  | 0.70573        | 0.003774 | 2.4232    | 1.0985         | 0.13558  | 0.85935  |
| Erucic acid                     | 1.482            | 0.56729  | 0.087516   | 1.0579        | 4.4684 | 2.1598   | 0.003432      | 2.4645    | 0.5985 | -0.74061       | 0.025451 | 1.5943    | 8.0762         | 3.0137   | 0.000341 |
| Ascorbic acid                   | 1.189            | 0.25007  | 0.091005   | 1.0409        | 1.3726 | 0.45689  | 0.015175      | 1.8189    | 1.3635 | 0.44735        | 0.010521 | 1.9779    | 1.0138         | 0.019835 | 0.92049  |
| Citric acid/isocitric acid      | 1.194            | 0.25564  | 0.091005   | 1.0409        | 2.0655 | 1.0465   | 5.28E-06      | 5.2776    | 1.0109 | 0.015577       | 0.89068  | 0.050276  | 1.5678         | 0.64875  | 0.000245 |
| Propionic acid                  | 1.245            | 0.31586  | 0.10986    | 0.95915       | 1.3872 | 0.47218  | 0.049414      | 1.3061    | 1.5984 | 0.67664        | 0.013874 | 1.8578    | 0.9378         | -0.09262 | 0.59965  |
| Glutaconic acid                 | 1.167            | 0.22236  | 0.11646    | 0.93383       | 1.9691 | 0.97755  | 1.57E-05      | 4.8031    | 0.988  | -0.01748       | 0.90903  | 0.041421  | 1.5228         | 0.60669  | 0.002032 |

Supplementary Table S5. List of dysregulated CCMs (carbon containing metabolites) in the media isolated from pancreatic cancer cell lines (PANC-1 and PPCL68) and normal pancreatic epithelial cells (HPDE and HPNE) when compared to the control media used for the growth of the each mentioned cell line, respectively.

|                               | PANC1 media vs IMEM media |          |          |             | PPCL68 media vs Advanced media |          |           |             | HPNE media vs KSFM media |          |          |             | HPDE media vs KSFM media |          |          |             |          |
|-------------------------------|---------------------------|----------|----------|-------------|--------------------------------|----------|-----------|-------------|--------------------------|----------|----------|-------------|--------------------------|----------|----------|-------------|----------|
|                               | FC                        | log2(FC) | FDR      | -log10(FDR) | FC                             | log2(FC) | FDR       | -log10(FDR) | FC                       | log2(FC) | FDR      | -log10(FDR) | FC                       | log2(FC) | FDR      | -log10(FDR) |          |
| Gamma-amino butyric acid      | ↑                         | 25.183   | 4.6544   | 5.71E-08    | 7.2433                         | 23.73    | 4.5689    | 4.68E-10    | 9.3298                   | 108.7    | 6.7637   | 4.80E-10    | 9.319                    | 91.88    | 6.5216   | 5.99E-08    | 7.2227   |
| Pyruvic acid                  | ↑                         | 4.6663   | 2.2223   | 4.05E-06    | 5.3926                         | 10.38    | 3.3756    | 2.29E-08    | 7.6409                   | 10.95    | 3.4524   | 7.66E-08    | 7.1157                   | 11.74    | 3.5538   | 8.92E-06    | 5.0496   |
| Alanine                       | ↑                         | 4.3167   | 2.1099   | 6.57E-06    | 5.1826                         | 0.793    | -0.33469  | 0.47658     | 0.32186                  | 11       | 3.4587   | 2.11E-07    | 6.6759                   | 12.33    | 3.6244   | 3.40E-05    | 4.4689   |
| Ornithine                     | ↑                         | 1.5934   | 0.67214  | 0.072642    | 1.1388                         | 1.116    | 0.1585    | 0.61387     | 0.21193                  | 2.388    | 1.2555   | 0.00048162  | 3.3173                   | 1.924    | 0.94394  | 0.15755     | 0.80258  |
| Oxalic acid                   | ↓                         | 0.876    | -0.19095 | 0.80591     | 0.093711                       | 0.258    | -1.9519   | 3.54E-05    | 4.451                    | 2.361    | 1.2396   | 0.0029331   | 2.5327                   | 1.402    | 0.48744  | 0.71846     | 0.1436   |
| Oxaloacetic acid              | ↑                         | 1.8359   | 0.87646  | 0.003023    | 2.5195                         | 0.975    | -0.036322 | 0.79663     | 0.098742                 | 2.33     | 1.2203   | 0.0029331   | 2.5327                   | 1.866    | 0.89955  | 0.14389     | 0.84198  |
| Malonic acid                  | ↑                         | 1.5462   | 0.62877  | 0.15917     | 0.79815                        | 1.525    | 0.60868   | 0.15795     | 0.80149                  | 2.811    | 1.4909   | 0.0045586   | 2.3412                   | 2.007    | 1.0049   | 0.1395      | 0.85542  |
| 4-Hydroxy proline             | ↑                         | 1.7393   | 0.79849  | 0.013532    | 1.8686                         | 0.98     | -0.029092 | 0.89044     | 0.050393                 | 2.208    | 1.1427   | 0.0045586   | 2.3412                   | 2.02     | 1.0141   | 0.14792     | 0.82998  |
| Ureidopropionic acid          | ↑                         | 1.7659   | 0.82042  | 0.032511    | 1.488                          | 0.97     | -0.043488 | 0.76912     | 0.11401                  | 2.21     | 1.1442   | 0.0054824   | 2.261                    | 1.985    | 0.98879  | 0.14389     | 0.84198  |
| 3-Hydroxybutyric acid         | ↑                         | 1.514    | 0.59835  | 0.20442     | 0.68948                        | 1.342    | 0.42463   | 0.17476     | 0.75756                  | 2.751    | 1.4597   | 0.005452    | 2.2563                   | 2.054    | 1.0382   | 0.1395      | 0.85542  |
| Asparagine                    | ↑                         | 1.866    | 0.89992  | 0.002082    | 2.6814                         | 0.794    | -0.33295  | 0.60437     | 0.2187                   | 2.079    | 1.0558   | 0.013878    | 1.8577                   | 1.664    | 0.73447  | 0.26209     | 0.58155  |
| Propionic acid                | ↑                         | 1.4222   | 0.50814  | 0.1803      | 0.74401                        | 1.159    | 0.21222   | 0.76912     | 0.11401                  | 1.491    | 0.5765   | 0.017544    | 1.7559                   | 1.844    | 0.88303  | 0.1395      | 0.85542  |
| 4-methyl-2-Oxo-pentanoic acid | ↓                         | 0.8766   | -0.18998 | 0.68951     | 0.16146                        | 0.565    | -0.82411  | 0.17476     | 0.75756                  | 0.572    | -0.80551 | 0.025733    | 1.5895                   | 0.571    | -0.8082  | 0.1395      | 0.85542  |
| Myristic acid                 | ↑                         | 1.0351   | 0.049809 | 0.94238     | 0.025775                       | 1.201    | 0.26467   | 0.24221     | 0.6158                   | 1.529    | 0.61273  | 0.038979    | 1.4092                   | 1.319    | 0.39958  | 0.26209     | 0.58155  |
| Threonine                     | ↓                         | 0.899    | -0.15366 | 0.8823      | 0.054384                       | 0.954    | -0.067305 | 0.79663     | 0.098742                 | 3.009    | 1.5892   | 0.049564    | 1.3048                   | 2.952    | 1.5615   | 0.41426     | 0.38273  |
| 4-Pyridoxic acid              | ↓                         | 0.9441   | -0.08304 | 0.83856     | 0.076464                       | 11.92    | 3.575     | 1.18E-06    | 5.9293                   | 2.398    | 1.2617   | 0.12836     | 0.89155                  | 1.138    | 0.18688  | 0.91616     | 0.03803  |
| Heneicosanoic acid            | ↑                         | 1.1634   | 0.21836  | 0.83856     | 0.076464                       | 2.473    | 1.3063    | 0.0082731   | 2.0823                   | 1.886    | 0.91526  | 0.37426     | 0.42682                  | 1.942    | 0.95738  | 0.28794     | 0.54069  |
| Docosahexanoic acid           | ↓                         | 0.7865   | -0.34646 | 0.80591     | 0.093711                       | 2.217    | 1.1483    | 0.015069    | 1.8219                   | 1.114    | 0.15542  | 0.6685      | 0.1749                   | 0.864    | -0.21155 | 0.90625     | 0.042753 |
| 3-Hydroxy Octanoic acid       | ↓                         | 0.7941   | -0.33263 | 0.46886     | 0.32895                        | 18.67    | 4.2224    | 8.64E-10    | 9.0635                   | 1.026    | 0.037329 | 0.92561     | 0.033572                 | 0.52     | -0.9439  | 0.1043      | 0.9817   |
