# Supplementary material for: An Optimized Method for LC-MS Based Quantification of Endogenous Organic Acids: Metabolic Perturbations in Pancreatic Cancer
Source: Preprints.org preprint supplement (doi:10.20944/preprints202404.0528.v1), 2024-04-08
Supplement: Supplementary file 3 [file supplementary]

Archive with 3 entries (3 files):
- Supplementary Information/Jain et al_Bulleted SOP.docx
- Supplementary Information/Jain et al_Bulleted SOP.pdf
- Supplementary Information/Jain et al_Supplementary Information.pdf
